# Supplementary material for: Association of breast cancer risk in BRCA1 and BRCA2 mutation carriers with genetic variants showing differential allelic expression: identification of a modifier of breast cancer risk at locus 11q22.3
Source: PubMed Central journal article supplement (PMC5222911; doi:10.1007/s10549-016-4018-2), 2016-10-28
Supplement: 10549_2016_4018_MOESM1_ESM.pdf [file 10549_2016_4018_MOESM1_ESM.pdf]

**Online Resource 1. Number of BRCA1 and BRCA2 mutation carriers by study**

| Acronym     | Study                                                                             | Country                   | Number of carriers |
|-------------|-----------------------------------------------------------------------------------|---------------------------|--------------------|
| BCFR        | Breast Cancer Family Registry                                                     | USA/Australia/Canada      | 812                |
| BFBICC      | Baltic Familial Breast Ovarian Cancer Consortium                                  | Latvia/Lithuania          | 146                |
| BIDMC       | Beth Israel Deaconess Medical Center                                              | USA                       | 54                 |
| BMBSA       | BRCA-gene mutations and breast cancer in South African women                      | South Africa              | 207                |
| BRICOH      | Beckman Research Institute of the City of Hope                                    | USA                       | 304                |
| CBCS        | Rigshospitalet                                                                    | Denmark                   | 391                |
| CNIO        | Spanish National Cancer Centre                                                    | Spain                     | 340                |
| COH         | City of Hope Cancer Center                                                        | USA                       | 332                |
| CONSIT TEAM | CONsorzio Studi Italiani sui Tumori Ereditari Alla Mammella                       | Italy                     | 1,323              |
| DEMOKRITOS  | National Centre for Scientific Research Demokritos                                | Greece                    | 195                |
| DFCI        | Dana Farber Cancer Institute                                                      | USA                       | 290                |
| DKFZ        | German Cancer Research Center                                                     | Germany/Pakistan/Colombia | 85                 |
| EMBRACE     | Epidemiological Study of Familial Breast Cancer                                   | UK                        | 2,479              |
| FCCC        | Fox Chase Cancer Center                                                           | USA                       | 169                |
| G-FAST      | Ghent University Hospital                                                         | Belgium                   | 270                |
| GC-HBOC     | German Familial Breast Group                                                      | Germany                   | 1,516              |
| GEMO        | Genetic Modifiers of cancer risk in BRCA1/2 mutation carriers                     | France/USA                | 2,116              |
| GEORGETOWN  | Georgetown University                                                             | USA                       | 16                 |
| GOG         | Gynecologic Oncology Group                                                        | USA                       | 657                |
| HCSC        | Hospital Clinico San Carlos                                                       | Spain                     | 244                |
| HEBCS       | Helsinki Breast Cancer Study                                                      | Finland                   | 218                |
| HEBON       | Genen Omgeving studie van de werkgroep Hereditair Borstkanker Onderzoek Nederland | Netherlands               | 2,008              |
| HUNBOCS     | Molecular Genetic Studies of Breast- and Ovarian Cancer in Hungary                | Hungary                   | 143                |
| HVH         | University Hospital Vall d'Hebron                                                 | Spain                     | 117                |
| ICO         | Institut Català d'Oncologia                                                       | Spain                     | 438                |
| IHCC        | International Hereditary Cancer Centre                                            | Poland                    | 703                |
| ILUH        | Iceland Landspítali - University Hospital                                         | Iceland                   | 129                |
| INHERIT     | Interdisciplinary HHealth Research Internal Team BReast CAncer susceptibility     | Canada (Quebec)           | 145                |
| IOVHBOCS    | Istituto Oncologico Veneto                                                        | Italy                     | 260                |
| IPOBCS      | Portuguese Oncology Institute-Porto Breast Cancer Study                           | Portugal                  | 95                 |
| KCONFAB     | Kathleen Cuningham Consortium for Research into Familial Breast Cancer            | Australia/New Zealand     | 1,167              |
| MAGIC       | Modifiers and Genetics in Cancer                                                  | USA                       | 54                 |
| MCGILL      | McGill University                                                                 | Canada (Quebec)           | 81                 |
| MAYO        | Mayo Clinic                                                                       | USA                       | 417                |
| MOD SQUAD   | Modifier Study of Quantitative Effects on Disease                                 | Czech Republic/Belgium    | 174                |
| MSKCC       | Memorial Sloane Kettering Cancer Center                                           | USA                       | 556                |
| MUV         | General Hospital Vienna                                                           | Austria                   | 646                |
| NCI         | National Cancer Institute                                                         | USA                       | 241                |
| NICCC       | National Israeli Cancer Control Center                                            | Israel                    | 169                |
| NNPIO       | N.N. Petrov Institute of Oncology                                                 | Russia                    | 51                 |
| OCGN        | Ontario Cancer Genetics Network                                                   | Canada                    | 391                |
| OSU CCG     | The Ohio State University Comprehensive Cancer Center                             | USA                       | 148                |
| OUH         | Odense University Hospital                                                        | Denmark                   | 573                |
| PBCS        | Università di Pisa                                                                | Italy                     | 80                 |
| SMC         | Sheba Medical Centre                                                              | Israel                    | 367                |
| SWE-BRCA    | Swedish Breast Cancer Study                                                       | Sweden                    | 540                |
| UCHICAGO    | University of Chicago                                                             | USA                       | 97                 |
| UCLA        | University of California Los Angeles                                              | USA                       | 41                 |
| UCSF        | University of California San Francisco                                            | USA                       | 130                |
| UKGRFOCR    | UK and Gilda Radner Familial Ovarian Cancer Registries                            | UK/USA                    | 77                 |
| UPENN       | University of Pennsylvania                                                        | USA                       | 655                |
| UTMDACC     | University of Texas MD Anderson Cancer Center                                     | USA                       | 115                |
| VFCTG       | Victorian Familial Cancer Trials Group                                            | Australia                 | 59                 |
| WCP         | Women's Cancer Program at Cedars-Sinai Medical Center                             | USA                       | 286                |
|             |                                                                                   | <b>TOTAL</b>              | <b>23,463</b>      |
