# Supplementary material for: Association of breast cancer risk in BRCA1 and BRCA2 mutation carriers with genetic variants showing differential allelic expression: identification of a modifier of breast cancer risk at locus 11q22.3
Source: PubMed Central journal article supplement (PMC5222911; doi:10.1007/s10549-016-4018-2), 2016-10-28
Supplement: 10549_2016_4018_MOESM3_ESM.pdf [file 10549_2016_4018_MOESM3_ESM.pdf]

Online Resource 3: List of selected genes and genetic variants associated with differential allelic expression

| Submitted SNP | Surrogates genotyped on the ICOGS array in replacement of original candidate SNPs | Chromosome | Position of genotyped SNPs* | Genes in which genotyped SNPs are located | Genes in which differential allelic expression is observed |
|---------------|-----------------------------------------------------------------------------------|------------|-----------------------------|-------------------------------------------|------------------------------------------------------------|
| rs11102709    | rs11102707                                                                        | 1          | 114493583                   | HIPK1                                     | DCLRE1B                                                    |
| rs1805415     | rs1136410                                                                         | 1          | 226555302                   | PARP1                                     | PARP1                                                      |
| rs11810440    | rs11806633                                                                        | 1          | 227308416                   | CDC42BPA                                  | CDC42BPA                                                   |
| rs11811771    | rs11811771                                                                        | 1          | 114463049                   | Intergenic                                | DCLRE1B                                                    |
| rs12025623    | rs12025623                                                                        | 1          | 21892479                    | ALPL                                      | ALPL                                                       |
| rs1395472     | rs12058802                                                                        | 1          | 91923254                    | Intergenic                                | CDC7                                                       |
| rs12087525    | rs12087525                                                                        | 1          | 114489754                   | HIPK1                                     | DCLRE1B                                                    |
| rs12093351    | rs12093351                                                                        | 1          | 114529464                   | Intergenic                                | DCLRE1B                                                    |
| rs12125947    | rs12125947                                                                        | 1          | 91990487                    | CDC7                                      | CDC7                                                       |
| rs13374264    | rs13374264                                                                        | 1          | 46683014                    | LURAP1 / POMGNT1                          | RAD54L                                                     |
| rs13447450    | rs13447450                                                                        | 1          | 91965850                    | CDC7                                      | CDC7                                                       |
| rs13447454    | rs13447454                                                                        | 1          | 91966406                    | CDC7                                      | CDC7                                                       |
| rs1767429     | rs1767429                                                                         | 1          | 21889340                    | ALPL                                      | ALPL                                                       |
| rs2020902     | rs2020902                                                                         | 1          | 15834360                    | CASP9                                     | CASP9                                                      |
| rs11119792    | rs2028706                                                                         | 1          | 211831380                   | NEK2                                      | NEK2                                                       |
| rs2233025     | rs2233025                                                                         | 1          | 11735652                    | MAD2L2                                    | MAD2L2                                                     |
| rs2336030     | rs2336030                                                                         | 1          | 11736600                    | MAD2L2                                    | MAD2L2                                                     |
| rs2805053     | rs2805053                                                                         | 1          | 162781787                   | HSD17B7                                   | HSD17B7                                                    |
| rs2911571     | rs2911571                                                                         | 1          | 85156821                    | SSX2IP                                    | PRKACB                                                     |
| rs6667862     | rs1052576                                                                         | 1          | 15832543                    | CASP9                                     | CASP9                                                      |
| rs4645989     | rs4645989                                                                         | 1          | 15850343                    | CASP9                                     | CASP9                                                      |
| rs4646047     | rs4646047                                                                         | 1          | 15831783                    | CASP9                                     | CASP9                                                      |
| rs4646091     | rs4646091                                                                         | 1          | 15822043                    | CASP9                                     | CASP9                                                      |
| rs471144      | rs471144                                                                          | 1          | 152454255                   | Intergenic                                | MCI-1                                                      |
| rs513826      | rs513826                                                                          | 1          | 38166022                    | CDC48                                     | CDC48                                                      |
| rs17485896    | rs522712                                                                          | 1          | 91943207                    | Intergenic                                | CDC7                                                       |
| rs6668665     | rs6673329                                                                         | 1          | 162794500                   | Intergenic                                | HSD17B7                                                    |
| rs6674384     | rs6674384                                                                         | 1          | 114455907                   | DCLRE1B                                   | DCLRE1B                                                    |
| rs6676779     | rs6676779                                                                         | 1          | 243875486                   | AKT3                                      | AKT3                                                       |
| rs510208      | rs686083                                                                          | 1          | 38149193                    | C1orf109                                  | CDC48                                                      |
| rs697004      | rs697004                                                                          | 1          | 211842808                   | NEK2                                      | NEK2                                                       |
| rs7521639     | rs7521639                                                                         | 1          | 227223736                   | CDC42BPA                                  | CDC42BPA                                                   |
| rs7546172     | rs7546172                                                                         | 1          | 227622011                   | CDC42BPA                                  | CDC42BPA                                                   |
| rs885814      | rs885814                                                                          | 1          | 21875916                    | ALPL                                      | ALPL                                                       |
| rs9793263     | rs9793263                                                                         | 1          | 46722389                    | RAD54L                                    | RAD54L                                                     |
| rs4675093     | rs10205923                                                                        | 2          | 227614557                   | IRS1                                      | IRS1                                                       |
| rs10490250    | rs10490250                                                                        | 2          | 58509628                    | Intergenic                                | FANCL                                                      |
| rs10495944    | rs10495944                                                                        | 2          | 47703290                    | MSH2                                      | MSH2                                                       |
| rs11674814    | rs11674814                                                                        | 2          | 202153846                   | ALS2CR12                                  | STRADB                                                     |
| rs11903456    | rs11903456                                                                        | 2          | 58393836                    | FANCL                                     | FANCL                                                      |
| rs12464787    | rs12464787                                                                        | 2          | 179440029                   | TTN-AS1/TTN                               | TTN                                                        |
| rs748869      | rs12477063                                                                        | 2          | 215673664                   | BARD1/LOC101928103                        | BARD1                                                      |
| rs13026390    | rs13001462                                                                        | 2          | 215678346                   | LOC101928103                              | BARD1                                                      |
| rs13019654    | rs13019654                                                                        | 2          | 47689217                    | MSH2                                      | MSH2                                                       |
| rs13021937    | rs13021937                                                                        | 2          | 215673937                   | BARD1                                     | BARD1                                                      |
| rs1421        | rs1421                                                                            | 2          | 47613870                    | EPCAM                                     | MSH2                                                       |
| rs16822638    | rs16822647                                                                        | 2          | 227651123                   | IRS1                                      | IRS1                                                       |
| rs11890159    | rs17702263                                                                        | 2          | 173459590                   | PDK1                                      | PDK1                                                       |
| rs17758988    | rs2063018                                                                         | 2          | 28318008                    | BRE                                       | BRE                                                        |
| rs207928      | rs207928                                                                          | 2          | 217036441                   | XRCC5                                     | XRCC5                                                      |
| rs2305354     | rs2305354                                                                         | 2          | 100019496                   | REV1                                      | REV1                                                       |
| rs4075604     | rs4075604                                                                         | 2          | 173387668                   | Intergenic                                | PDK1                                                       |
| rs4233638     | rs4663992                                                                         | 2          | 234889177                   | TRPM8                                     | UGT1A1                                                     |
| rs668844      | rs668844                                                                          | 2          | 217021602                   | XRCC5                                     | XRCC5                                                      |
| rs6715570     | rs6715570                                                                         | 2          | 215673440                   | BARD1                                     | BARD1                                                      |
| rs6721310     | rs6721310                                                                         | 2          | 28319320                    | BRE                                       | BRE                                                        |
| rs6757091     | rs6757091                                                                         | 2          | 215672793                   | BARD1                                     | BARD1                                                      |
| rs726379      | rs726379                                                                          | 2          | 231685198                   | CAB39                                     | CAB39                                                      |
| rs7609252     | rs12052479                                                                        | 2          | 173404804                   | BUB1                                      | BUB1                                                       |
| rs768298      | rs768298                                                                          | 2          | 58410972                    | FANCL                                     | FANCL                                                      |
| rs6443276     | rs13066757                                                                        | 3          | 10045030                    | EMC3-AS1                                  | FANCD2                                                     |
| rs13073141    | rs13073141                                                                        | 3          | 51410485                    | DOCK3                                     | rad54L2                                                    |
| rs13082648    | rs13082648                                                                        | 3          | 142129008                   | XRN1                                      | ATR                                                        |
| rs13099560    | rs13099560                                                                        | 3          | 48204768                    | CDC25A                                    | CDC25A                                                     |
| rs16838754    | rs16838754                                                                        | 3          | 131843104                   | Intergenic                                | TOPBP1                                                     |
| rs2087760     | rs2087760                                                                         | 3          | 27375730                    | SLC4A7                                    | SLC4A7                                                     |
| rs1043943     | rs4103004                                                                         | 3          | 20042834                    | PP2D1                                     | XPC                                                        |
| rs4241370     | rs4241370                                                                         | 3          | 133794199                   | Intergenic                                | RYK                                                        |
| rs10804625    | rs4552343                                                                         | 3          | 133842112                   | Intergenic                                | RYK                                                        |
| rs6807775     | rs6807775                                                                         | 3          | 65133697                    | Intergenic                                | BAP1                                                       |
| rs7611218     | rs7611218                                                                         | 3          | 10063960                    | CIDECP                                    | FANCD2                                                     |
| rs7626117     | rs7626117                                                                         | 3          | 10140671                    | FAND2                                     | FANCD2                                                     |
| rs6795164     | rs7639683                                                                         | 3          | 133973731                   | Intergenic                                | RYK                                                        |
| rs7653368     | rs7653368                                                                         | 3          | 47985361                    | CDC25A                                    | CDC25A                                                     |
| rs803335      | rs803335                                                                          | 3          | 10085035                    | FANCD2                                    | FANCD2                                                     |
| rs4693089     | rs11099601                                                                        | 4          | 84382763                    | FAM175A                                   | FAM175A                                                    |
| rs2866416     | rs11946020                                                                        | 4          | 103944742                   | SLC9B2                                    | UBE2D3                                                     |
| rs1354360     | rs1354360                                                                         | 4          | 70616322                    | SULT1B1                                   | SULT1E1                                                    |
| rs1389999     | rs1389999                                                                         | 4          | 14858341                    | LINC00504                                 | CPEB2                                                      |
| rs1503721     | rs1503721                                                                         | 4          | 70679571                    | Intergenic                                | SULT1E1                                                    |
| rs223385      | rs150895                                                                          | 4          | 103712589                   | 4:102791432                               | UBE2D3                                                     |
| rs17355027    | rs17355027                                                                        | 4          | 84388915                    | FAM175A                                   | FAM175A                                                    |
| rs17802877    | rs17802877                                                                        | 4          | 1720346                     | TMEM129                                   | TACC3                                                      |
| rs223497      | rs223497                                                                          | 4          | 103653976                   | MANBA                                     | UBE2D3                                                     |
| rs93059       | rs230530                                                                          | 4          | 103453980                   | NFKB1                                     | UBE2D3                                                     |
| rs11722394    | rs2788865                                                                         | 4          | 26446006                    | Intergenic                                | RB1                                                        |
| rs2854915     | rs2854915                                                                         | 4          | 1721654                     | TACC3/TMEM129                             | TACC3                                                      |
| rs3774936     | rs3774937                                                                         | 4          | 103434253                   | NFKB1                                     | NFKB                                                       |

|            |            |    |           |                  |                  |
|------------|------------|----|-----------|------------------|------------------|
| rs4647601  | rs4647601  | 4  | 185570032 | CASP3            | CASP3            |
| rs4647616  | rs4647610  | 4  | 185567931 | CASP3            | CASP3            |
| rs6830624  | rs6830624  | 4  | 104020422 | BDH2             | CENPE            |
| rs11728699 | rs7439493  | 4  | 110656730 | Intergenic       | CASP6            |
| rs798755   | rs798755   | 4  | 1720824   | TMEM129          | TACC3            |
| rs1494961  | rs971539   | 4  | 84433804  | Intergenic       | FAM175A          |
| rs2168805  | rs980455   | 4  | 103418957 | Intergenic       | NFKB             |
| rs9998559  | rs9998559  | 4  | 15113921  | Intergenic       | CPEB2            |
| rs12517451 | rs12517451 | 5  | 79920073  | Intergenic       | MSH3             |
| rs878234   | rs13171253 | 5  | 43160433  | ZNF131           | MGC42105/NIM1K   |
| rs13176284 | rs13176284 | 5  | 34754248  | RAI14            | Rad1             |
| rs2915794  | rs1432693  | 5  | 147609136 | Intergenic       | SPINK7           |
| rs1650697  | rs1650697  | 5  | 79950781  | DHFR et MSH3     | MSH3             |
| rs17772583 | rs17772583 | 5  | 131953510 | Rad50            | Rad50            |
| rs2362974  | rs2362974  | 5  | 36156654  | SKP2             | SKP2             |
| rs374745   | rs2546163  | 5  | 76995054  | TBCA             | TBCA             |
| rs2652218  | rs2652217  | 5  | 76980244  | Intergenic       | TBCA             |
| rs2662370  | rs2662370  | 5  | 76981357  | Intergenic       | TBCA             |
| rs2706369  | rs2706369  | 5  | 131932203 | Rad50            | Rad50            |
| rs29636    | rs29635    | 5  | 171024355 | Intergenic       | NPM1             |
| rs359454   | rs359445   | 5  | 173285204 | Intergenic       | CPEB4            |
| rs3797306  | rs3797306  | 5  | 43127925  | ZNF131           | MGC42105         |
| rs425463   | rs425463   | 5  | 79901952  | Intergenic       | MSH3             |
| rs4302608  | rs4302608  | 5  | 170840504 | Intergenic       | NPM1             |
| rs6151599  | rs6151599  | 5  | 79951032  | DHFR et MSH3     | MSH3             |
| rs6453340  | rs6453340  | 5  | 76962274  | Intergenic       | TBCA             |
| rs7702272  | rs7702272  | 5  | 36160854  | SKP2             | SKP2             |
| rs7707008  | rs7707008  | 5  | 170801952 | Intergenic       | NPM1             |
| rs7722173  | rs7722173  | 5  | 176384683 | UIMC1            | UIMC1            |
| rs1077394  | rs1077394  | 6  | 31610384  | BAG6             | AIF              |
| rs1144708  | rs1144708  | 6  | 31710020  | MSH5-SAPCD1      | AIF              |
| rs11753187 | rs11753187 | 6  | 111781972 | REV3L            | REV3             |
| rs12208908 | rs12208908 | 6  | 109048366 | Intergenic       | FOXO3            |
| rs1159806  | rs1268166  | 6  | 109008232 | Intergenic       | FOXO3            |
| rs13210247 | rs13210247 | 6  | 111922720 | TRAF3IP2         | FYN              |
| rs4947349  | rs1480380  | 6  | 32913246  | Intergenic       | BRD2             |
| rs17254634 | rs17254634 | 6  | 80751942  | TTK              | TTK              |
| rs195385   | rs195385   | 6  | 37333796  | RNF8             | RNF8             |
| rs206776   | rs206776   | 6  | 32953711  | Intergenic       | BRD2             |
| rs210170   | rs210170   | 6  | 33525680  | Intergenic       | BAK1             |
| rs2179070  | rs2179070  | 6  | 111885752 | TRAF3IP2-AS1     | REV3L            |
| rs2269058  | rs2269058  | 6  | 37324857  | RNF8             | RNF8             |
| rs2280152  | rs2280152  | 6  | 112375889 | WISP3            | FYN              |
| rs2284923  | rs2284923  | 6  | 37348920  | RNF8             | RNF8             |
| rs3106191  | rs3106191  | 6  | 33280505  | TAPBP            | DAXX             |
| rs3130000  | rs3130000  | 6  | 30628082  | DHX16            | MDC1             |
| rs3176326  | rs3176326  | 6  | 36647289  | CDKN1A           | CDKN1A           |
| rs3777947  | rs3777947  | 6  | 112433664 | Intergenic       | FYN              |
| rs396746   | rs396746   | 6  | 33557045  | GGNBP1           | BAK1             |
| rs465969   | rs465969   | 6  | 111655530 | REV3L            | REV3L            |
| rs4710127  | rs4710127  | 6  | 167276041 | RPS6KA2          | RPS6KA2          |
| rs671271   | rs671271   | 6  | 112261385 | Intergenic       | FYN              |
| rs726230   | rs726230   | 6  | 11200574  | NEDD9            | NEDD9            |
| rs733590   | rs733590   | 6  | 36645203  | CDKN1A           | CDKN1A           |
| rs1740377  | rs809193   | 6  | 112020414 | FYN              | FYN              |
| rs9276931  | rs9276931  | 6  | 32928984  | Intergenic       | BRD2             |
| rs9296095  | rs9296095  | 6  | 33542523  | BAK1             | BAK1             |
| rs9386747  | rs9386747  | 6  | 109038738 | Intergenic       | FOXO3            |
| rs9457245  | rs9457245  | 6  | 167340715 | Intergenic       | RPS6KA2          |
| rs9468322  | rs9468322  | 6  | 28231243  | Intergenic       | NKAPL            |
| rs1534078  | rs10241838 | 7  | 96343665  | Intergenic       | SHFM1            |
| rs12666800 | rs12666800 | 7  | 45906594  | Intergenic       | IGFBP-1          |
| rs6968090  | rs6968090  | 7  | 96318575  | SHFM1            | SHFM1            |
| rs6948097  | rs7804722  | 7  | 92288106  | CDK6             | CDK6             |
| rs10104637 | rs10104637 | 8  | 95393925  | RAD54B           | RAD54B           |
| rs1011683  | rs1011683  | 8  | 91020834  | DECR1            | NBN              |
| rs11574158 | rs11574158 | 8  | 30891353  | PURG/WRN         | WRN              |
| rs11574398 | rs11574398 | 8  | 31025343  | WRN              | WRN              |
| rs11786591 | rs11786591 | 8  | 74916344  | 8q21             | 8q21             |
| rs13279327 | rs13279327 | 8  | 48442384  | SPIDR            | PRKDC            |
| rs17525603 | rs17525603 | 8  | 80588407  | Intergenic       | ESR1             |
| rs11779458 | rs2445614  | 8  | 128212594 | Intergenic       | Intergenic       |
| rs2515102  | rs2450551  | 8  | 95351843  | Intergenic       | RAD54B           |
| rs6982040  | rs6982040  | 8  | 48708742  | PRKDC            | PRKDC            |
| rs1056171  | rs1056171  | 9  | 133761001 | ABL1             | ABL1             |
| rs10972278 | rs10972278 | 9  | 35000289  | Intergenic       | FANCG            |
| rs11535662 | rs11535662 | 9  | 140143801 | 9orf173 /FAM166A | NELFB ( COBRA1 ) |
| rs12004745 | rs12004745 | 9  | 21812349  | MTAP             | CDKN2B           |
| rs4284139  | rs16923815 | 9  | 100480357 | Intergenic       | XPA              |
| rs2808682  | rs2039971  | 9  | 21815166  | MTAP             | XPA              |
| rs2069422  | rs2069422  | 9  | 22008026  | CDKN2B           | CDKN2B           |
| rs28631372 | rs28631372 | 9  | 140148051 | C9orf173         | NEFLB ( COBRA1 ) |
| rs595429   | rs595429   | 9  | 35055669  | VCP              | FANCG            |
| rs6597642  | rs6597642  | 9  | 133725767 | ABL1             | ABL1             |
| rs10829172 | rs10764686 | 10 | 27475494  | MASTL            | MASTL            |
| rs1127687  | rs1127687  | 10 | 115490109 | CASP7            | CASP7            |
| rs11574852 | rs11574852 | 10 | 104161475 | NFKB2            | NFKB2            |
| rs7099427  | rs12255933 | 10 | 126579158 | Intergenic       | BID              |
| rs12411618 | rs12411618 | 10 | 94052164  | CPEB             | CPEB             |
| rs2260184  | rs1904415  | 10 | 62540453  | CDK1             | CDK1             |
| rs1937881  | rs1937881  | 10 | 5066511   | AKR1C3           | AKR1C3           |
| rs2227309  | rs2227309  | 10 | 115489167 | CASP7            | CASP7            |
| rs2419851  | rs2419851  | 10 | 115380608 | NRAP             | CASP7            |
| rs3780926  | rs3780926  | 10 | 27436295  | YME1L1           | MASTL            |

|            |            |    |           |                   |                  |
|------------|------------|----|-----------|-------------------|------------------|
| rs3814231  | rs3814231  | 10 | 115481018 | CASP7             | CASP7            |
| rs11191389 | rs4147155  | 10 | 104536771 | WBP1L             | CYP17A1          |
| rs4353229  | rs4353229  | 10 | 115489589 | CASP7             | CASP7            |
| rs4919438  | rs6584354  | 10 | 102007714 | CWF19L1           | CHUK             |
| rs7091128  | rs7091128  | 10 | 27466473  | MASTL             | MASTL            |
| rs788221   | rs788209   | 10 | 27434716  | YME1L1            | MASTL            |
| rs7900024  | rs7900024  | 10 | 27444763  | MASTL             | MASTL            |
| rs882474   | rs882474   | 10 | 27477865  | Intergenic        | MASTL            |
| rs11020789 | rs10765682 | 11 | 94198269  | MRE11A            | MRE11            |
| rs10768975 | rs10838158 | 11 | 43752522  | HSD17B12          | HSD17B12         |
| rs11555762 | rs11555762 | 11 | 43876698  | HSD17B12          | AR               |
| rs11606458 | rs11606458 | 11 | 6623918   | ILK               | ILK              |
| rs12271212 | rs12271212 | 11 | 77197817  | Intergenic        | PAK1             |
| rs17140162 | rs17140162 | 11 | 125490616 | STT3A             | CHEK1            |
| rs1805363  | rs1805363  | 11 | 94226952  | MRE11             | MRE11            |
| rs624366   | rs183459   | 11 | 108089197 | NPAT              | ATM              |
| rs2255538  | rs2255538  | 11 | 6629042   | ILK               | ILK              |
| rs830084   | rs2279238  | 11 | 47282024  | NR1H3             | DDB2             |
| rs228589   | rs228592   | 11 | 108123189 | ATM               | ATM              |
| rs2862961  | rs2862961  | 11 | 43656535  | LOC101928704      | AR               |
| rs2957873  | rs2957873  | 11 | 47249294  | DDB2              | DDB2             |
| rs3212907  | rs3212907  | 11 | 69468776  | CCND1             | CCND1            |
| rs2013867  | rs326222   | 11 | 47259668  | DDB2              | DDB2             |
| rs3814707  | rs3814707  | 11 | 65560785  | OVOL1             | KATS             |
| rs7926512  | rs4244812  | 11 | 65480768  | KATS              | KATS             |
| rs4435030  | rs4435030  | 11 | 74806005  | Intergenic        | RB1              |
| rs4647709  | rs4647709  | 11 | 47237359  | DDB2              | DDB2             |
| rs601046   | rs511484   | 11 | 100918433 | PGR               | PGR              |
| rs656040   | rs656040   | 11 | 65621057  | SNX32             | Mus81            |
| rs6589007  | rs6589007  | 11 | 108040104 | NPAT              | ATM              |
| rs6592537  | rs6592537  | 11 | 70172975  | PPF1A1            | FADD             |
| rs660442   | rs660442   | 11 | 64042997  | BAD               | BAD              |
| rs7110437  | rs7110437  | 11 | 43780553  | HSD17B12          | HSD17B12         |
| rs7118659  | rs7118659  | 11 | 43817125  | HSD17B12          | HSD17B12         |
| rs7131110  | rs7131110  | 11 | 43846850  | HSD17B12          | HSD17B12         |
| rs7928422  | rs7928422  | 11 | 43749199  | HSD17B12          | HSD17B12         |
| rs7928685  | rs7928685  | 11 | 6773439   | Intergenic        | ILK              |
| rs7951583  | rs7951583  | 11 | 9573518   | LOC105376543      | WEE1             |
| rs9667035  | rs9667035  | 11 | 1907653   | LSP1              | LSP1             |
| rs10160981 | rs10160981 | 12 | 110904075 | GNP3              | RAD9B            |
| rs7301841  | rs10842893 | 12 | 27422886  | STK38L            | STK38L           |
| rs7313628  | rs10846535 | 12 | 124130388 | GTF2H3            | GTF2H3           |
| rs10876864 | rs10876864 | 12 | 56401085  | IKZF4             | CDK2             |
| rs4758677  | rs11060333 | 12 | 122678607 | LRRC43            | DIABLO           |
| rs12368451 | rs12368451 | 12 | 99115661  | APAF1             | APAF1            |
| rs1291351  | rs1291351  | 12 | 13084082  | CDKN1B            | CDKN1B           |
| rs1502337  | rs1502337  | 12 | 111062852 | TCTN1             | RAD9B            |
| rs17497606 | rs17497606 | 12 | 27494449  | ARNTL2            | STK38L           |
| rs203343   | rs203343   | 12 | 120233601 | CIT               | CIT              |
| rs2066827  | rs2066827  | 12 | 12871099  | CDKN1B            | CDKN1B           |
| rs2069502  | rs2069502  | 12 | 58144665  | CDK4              | CDK4             |
| rs2162679  | rs2162679  | 12 | 102871259 | IGF1              | IGF1             |
| rs2996028  | rs2996028  | 12 | 120165155 | CIT               | CIT              |
| rs3850952  | rs3850952  | 12 | 124090802 | DDX55             | GTF2H3           |
| rs6488889  | rs6488889  | 12 | 124144793 | GTF2H3            | GTF2H3           |
| rs6490269  | rs6490269  | 12 | 120207175 | CIT               | CIT              |
| rs841626   | rs703842   | 12 | 58162739  | CYP27B1/METTL1    | STK38L           |
| rs7971802  | rs708170   | 12 | 27237085  | C12orf71          | STK38L           |
| rs7967755  | rs7967755  | 12 | 986004    | WNK1              | Rad52            |
| rs7971725  | rs7971725  | 12 | 98981483  | Intergenic        | Apaf1            |
| rs904654   | rs904654   | 12 | 120189888 | CIT               | CIT              |
| rs4964035  | rs922275   | 12 | 27402709  | STK38L            | STK38L           |
| rs12870195 | rs11164141 | 13 | 114259570 | TFDP1             | TFDP1            |
| rs7325708  | rs12870278 | 13 | 103543243 | METTL21EP         | ERCC5            |
| rs1408047  | rs1408047  | 13 | 103484918 | BIVM-ERCC5        | ERCC5            |
| rs1887894  | rs1887894  | 13 | 21607600  | lasts2            | Lasts2           |
| rs2232642  | rs2232642  | 13 | 108861048 | LIG4              | LIG4             |
| rs4119478  | rs4119478  | 13 | 73254212  | Intergenic        | C13ORF34/BORA    |
| rs7317356  | rs4150792  | 13 | 114288971 | TFDP1             | TFDP1            |
| rs7335262  | rs7328482  | 13 | 21877418  | LINC00539/MIPEPP3 | LATS2            |
| rs4545698  | rs9509492  | 13 | 21608971  | LATS2             | TFDP1            |
| rs2877455  | rs12880109 | 14 | 68813032  | RAD51B            | RAD51L1          |
| rs17105760 | rs17105760 | 14 | 68984500  | RAD51B (Rad51L1)  | RAD51B (Rad51L1) |
| rs17106237 | rs17106237 | 14 | 69203145  | Intergenic        | RAD51B (Rad51L1) |
| rs11160756 | rs2896489  | 14 | 104108743 | KLC1              | XRCC3            |
| rs2357479  | rs3020445  | 14 | 64788644  | ESR2              | ESR2             |
| rs4983559  | rs4983559  | 14 | 105277209 | Intergenic        | AKT1             |
| rs861537   | rs861537   | 14 | 104167075 | KLC1/XRCC3        | XRCC3            |
| rs11072076 | rs11072076 | 15 | 69473147  | GLCE              | SMAD3            |
| rs7180135  | rs12592524 | 15 | 41003463  | RAD51             | RAD51            |
| rs12902785 | rs12902785 | 15 | 66928241  | Intergenic        | SMAD3            |
| rs12908284 | rs12908284 | 15 | 40999504  | RAD51             | RAD51            |
| rs1565866  | rs1565866  | 15 | 40455894  | BUB1B             | BUB1B            |
| rs2118612  | rs2118612  | 15 | 67400490  | SMAD3             | SMAD3            |
| rs2619679  | rs2619679  | 15 | 40986237  | RAD51-AS1         | RAD51            |
| rs389480   | rs389480   | 15 | 91351930  | BLM               | BLM              |
| rs4779041  | rs4779041  | 15 | 83337059  | AP3B2/LOC283692   | CPEB1            |
| rs570933   | rs570933   | 15 | 43824030  | MAP1A             | TP53BP1          |
| rs7178117  | rs6494633  | 15 | 67423306  | SMAD3             | SMAD3            |
| rs7165509  | rs7165509  | 15 | 40945900  | CASC5             | Rad51            |
| rs7178873  | rs7178873  | 15 | 40489387  | BUB1B             | BUB1B            |
| rs1061621  | rs1061621  | 16 | 1376892   | UBE2I             | UBE2I            |
| rs11076628 | rs11076628 | 16 | 89875246  | FANCA             | FANCA            |
| rs11643201 | rs11643201 | 16 | 83312375  | CDH13             | HSD17B2          |

|            |            |    |          |                  |          |
|------------|------------|----|----------|------------------|----------|
| rs2028265  | rs12051039 | 16 | 78488305 | WVVOX            | WVVOX    |
| rs12446804 | rs12447418 | 16 | 19539858 | CCP110           | CP110    |
| rs12923828 | rs12923828 | 16 | 78265497 | WVVOX            | WVVOX    |
| rs16947165 | rs16947165 | 16 | 78159277 | WVVOX            | WVVOX    |
| rs1886701  | rs1886701  | 16 | 68676932 | CDH3             | CDH1     |
| rs2023671  | rs2023671  | 16 | 23849839 | PRKCB            | PRKCB    |
| rs8052688  | rs2268049  | 16 | 1371154  | UBE2I            | UBE2I    |
| rs249941   | rs249941   | 16 | 23644738 | PALB2            | PALB2    |
| rs2745098  | rs2745098  | 16 | 1536535  | PTX4             | UBE2I    |
| rs3136042  | rs3136042  | 16 | 14014055 | ERCC4            | ERCC4    |
| rs2159113  | rs4785722  | 16 | 89863110 | ZNF276           | FANCA    |
| rs3785403  | rs6500437  | 16 | 89789898 | ZNF276           | FANCA    |
| rs7189213  | rs6564520  | 16 | 78306219 | WVVOX            | WVVOX    |
| rs8057970  | rs7135     | 16 | 19514483 | GDE1             | CP110    |
| rs7195066  | rs7195066  | 16 | 89836323 | FANCA            | FANCA    |
| rs7195624  | rs7195624  | 16 | 9010213  | USP7             | USP7     |
| rs7302     | rs7302     | 16 | 1375263  | UBE2I            | UBE2I    |
| rs8061528  | rs8061528  | 16 | 3656482  | SLX4             | BTBD12   |
| rs9927946  | rs9927946  | 16 | 9083367  | Intergenic       | USP7     |
| rs9935995  | rs9935995  | 16 | 19592730 | C16orf62         | CP110    |
| rs12952884 | rs12952884 | 17 | 49226051 | Intergenic       | NME1     |
| rs17734    | rs17734    | 17 | 1801144  | RPA1             | RPA1     |
| rs17761467 | rs17761467 | 17 | 1805677  | Intergenic       | RPA1     |
| rs2854152  | rs17817865 | 17 | 53032425 | STRADA           | STRADA   |
| rs3744768  | rs2070776  | 17 | 62007498 | CD79B            | RPA1     |
| rs2078486  | rs2078486  | 17 | 7583083  | TP53             | SHBG     |
| rs2239680  | rs2239680  | 17 | 76219783 | BIRC5            | BIRC5    |
| rs9891949  | rs2278637  | 17 | 8062102  | VAMP2            | AURKB    |
| rs1042522  | rs2287498  | 17 | 7592560  | TP53/WRAP53      | TP53     |
| rs3027247  | rs3027247  | 17 | 8130867  | CTC1             | AURKB    |
| rs1468501  | rs3826392  | 17 | 11922904 | MAP2K4           | MAP2K4   |
| rs4252596  | rs4252596  | 17 | 37855834 | ERBB2            | ERBB2    |
| rs4794136  | rs4794136  | 17 | 48433958 | XYLT2            | Eme-1    |
| rs7217885  | rs7217885  | 17 | 48405172 | Intergenic       | Eme-1    |
| rs8066463  | rs8066463  | 17 | 61818390 | STRADA           | STRADA   |
| rs8079273  | rs8079273  | 17 | 7597478  | WRAP53           | P53      |
| rs9911630  | rs9911630  | 17 | 41188342 | APAF1-ANKS1B     | BRCA1    |
| rs11082221 | rs11082221 | 18 | 20531677 | RBBP8            | RBBP8    |
| rs12966424 | rs12966424 | 18 | 12678486 | Cep76            | Cep76    |
| rs13381022 | rs13381022 | 18 | 18532756 | ROCK1            | ROCK1    |
| rs4800640  | rs4800640  | 18 | 18969404 | GREB1L           | ROCK1    |
| rs6567131  | rs6567131  | 18 | 57579140 | Intergenic       | PMAIP1   |
| rs16973592 | rs7234479  | 18 | 20599564 | RBBP8            | RBBP8    |
| rs9304261  | rs9304261  | 18 | 20606596 | RBBP8            | RBBP8    |
| rs16973631 | rs9319956  | 18 | 57594068 | Intergenic       | RBBP8    |
| rs4556910  | rs16963425 | 19 | 30340724 | Intergenic       | CCNE1    |
| rs12052070 | rs17294094 | 19 | 48720926 | CARD8            | AR       |
| rs1805419  | rs1805419  | 19 | 49459104 | BAX              | BAX      |
| rs2298881  | rs2298881  | 19 | 45926916 | ERCC1            | ERCC1    |
| rs3764640  | rs3764640  | 19 | 1207238  | STK11            | STK11    |
| rs1009316  | rs3817074  | 19 | 49459212 | BAX              | BAX      |
| rs7247515  | rs7247515  | 19 | 40755915 | AKT2             | AKT      |
| rs751731   | rs751731   | 19 | 33463058 | C19ORF40         | C19ORF40 |
| rs17362677 | rs16979815 | 20 | 54941087 | FAM210B          | AURKA    |
| rs2267857  | rs2267860  | 20 | 43655135 | STK4             | STK4     |
| rs2422978  | rs2422978  | 20 | 4763108  | RASSF2           | PCNA     |
| rs4815608  | rs4813643  | 20 | 3787755  | LOC101929125     | CDC25B   |
| rs6088857  | rs6060446  | 20 | 30231637 | COX4I2           | BCL2L1   |
| rs6086987  | rs6086987  | 20 | 9685155  | PAK7             | PAK7     |
| rs6133777  | rs6133777  | 20 | 9995950  | Intergenic       | PAK7     |
| rs85021    | rs85021    | 20 | 45179495 | OCSTAMP          | ube2c    |
| rs910671   | rs910671   | 20 | 43601921 | STK4             | STK4     |
| rs988166   | rs988166   | 20 | 54920858 | AURKA            | AURKA    |
| rs235314   | rs235314   | 21 | 46271452 | PTTG1IP          | SUMO3    |
| rs2838690  | rs2838690  | 21 | 46222486 | LINC01424/UBE2G2 | SUMO3    |
| rs9306116  | rs2838693  | 21 | 46227872 | SUMO3            | SUMO     |
| rs4239838  | rs4239838  | 21 | 46202309 | UBE2G2           | SUMO3    |
| rs104664   | rs104664   | 22 | 45711854 | FAM118A          | SMC1B    |
| rs138691   | rs138691   | 22 | 39115310 | GTPBP1           | RB1      |
| rs181390   | rs181390   | 22 | 18222263 | BID              | BID      |
| rs4822002  | rs4822011  | 22 | 41550954 | EP300            | EP300    |
| rs5762814  | rs5762814  | 22 | 29203964 | Intergenic       | CHEK2    |
| rs737866   | rs737866   | 22 | 19930109 | COMT             | COMT     |
| rs9620797  | rs738200   | 22 | 28792887 | TTC28            | CHEK2    |
| rs738207   | rs738207   | 22 | 35829452 | MCM5             | MCM5     |
| rs740603   | rs740603   | 22 | 19945177 | COMT             | COMT     |
| rs9332362  | rs9332362  | 22 | 19949103 | COMT             | COMT     |
| rs9605031  | rs9605031  | 22 | 19921378 | TXNRD2           | COMT     |
| rs9607761  | rs9607761  | 22 | 41371418 | Intergenic       | EP300    |

Build 37 coordinates
