# Supplementary material for: Association of breast cancer risk in BRCA1 and BRCA2 mutation carriers with genetic variants showing differential allelic expression: identification of a modifier of breast cancer risk at locus 11q22.3
Source: Breast Cancer Res Treat. 2016 Oct 28;161(1):117–34. doi: 10.1007/s10549-016-4018-2 (PMC5222911; doi:10.1007/s10549-016-4018-2)
Supplement: Supplementary file 5 — Supplementary material 5 (XLSX 281 kb) [file 10549_2016_4018_MOESM5_ESM.xlsx]

## Sheet: BC risk
Online Resource 5a. Associations with overall and estrogen receptor-positive and -negative breast cancer in BRCA1 and BRCA2 mutation carriers
BRCA1 carriers										Overall risk				Tumour subtype specific risk
SNP	Chromos	Position	Nearby genes	Nctrl	Ncase	allele1	allele2	MAF		HR	95% CI	p-value		HR_ERpos	95% CI ERpos	p_ERpos	HR_ERneg	95% CI ERneg	p_ERneg	p_dif
rs2233025	1	11735652	FBXO2:FBXO44:FBXO6:MAD2L2:C1orf187	7452	7790	G	A	0.176388		1.009	(0.955-1.064)	0.776603		0.952	(0.837-1.084)	0.461894	1.026	(0.962-1.093)	0.434825	0.339346
rs2336030	1	11736600	FBXO2:FBXO44:FBXO6:MAD2L2:C1orf187	7451	7786	G	A	0.327394		0.974	(0.932-1.018)	0.259028		0.95	(0.856-1.053)	0.329465	0.981	(0.932-1.033)	0.470671	0.59762
rs4646091	1	15822043	CTRC:CELA2A:CELA2B:CASP9:DNAJC16	7454	7797	A	G	0.232018		0.9904	(0.943-1.04)	0.702599		1.042	(0.932-1.164)	0.468124	0.975	(0.920-1.033)	0.39598	0.323834
rs1052576	1	15832543	CASP9	7340	7678	G	A	0.46		0.997	(0.956-1.039)	0.917		1.025	(0.934-1.125)	0.598	0.989	(0.941-1.038)	0.649	0.514
rs2020902	1	15834360	CELA2A:CELA2B:CASP9:DNAJC16	7453	7796	A	G	0.146174		1.006	(0.950-1.066)	0.840868		1.088	(0.959-1.234)	0.189822	0.982	(0.917-1.051)	0.601927	0.178989
rs4645989	1	15850343	CELA2B:CASP9:DNAJC16:AGMAT	7446	7785	A	G	0.301162		1.014	(0.969-1.061)	0.569994		0.932	(0.841-1.033)	0.18044	1.04	(0.986-1.096)	0.148169	0.0738638
rs885814	1	21875916	ALPL:RAP1GAP	7455	7796	G	A	0.323684		1.001	(0.957-1.047)	0.973947		1	(0.907-1.113)	0.925592	1	(0.948-1.054)	0.988593	0.931577
rs1767429	1	21889340	ALPL:RAP1GAP	7445	7780	A	G	0.417701		0.9967	(0.955-1.039)	0.82231		0.979	(0.891-1.076)	0.660514	1.002	(0.953-1.053)	0.930085	0.680201
rs12025623	1	21892479	ALPL:RAP1GAP	7453	7796	G	A	0.363663		1.001	(0.957-1.045)	0.952919		0.973	(0.881-1.074)	0.58558	1.009	(0.959-1.061)	0.731872	0.534621
rs686083	1	38149193	RSPO1:C1orf109:CDCA8:EPHA10	7453	7795	G	A	0.268822		0.9997	(0.954-1.047)	0.981295		1.031	(0.930-1.143)	0.556215	0.99	(0.938-1.045)	0.723462	0.50664
rs513826	1	38166022	C1orf109:CDCA8:EPHA10	7453	7797	A	G	0.455607		0.9738	(0.933-1.015)	0.230953		1.011	(0.917-1.114)	0.823447	0.963	(0.916-1.012)	0.135617	0.402549
rs13374264	1	46683014	TSPAN1:POMGNT1:C1orf190:RAD54L	7455	7797	G	A	0.000917912		0.5007	(0.243-1.03)	0.094716		NA	(NA-NA)	NA	NA	(NA-NA)	NA	NA
rs9793263	1	46722389	C1orf190:RAD54L:LRRC41:UQCRH	7439	7773	G	A	0.403234		0.977	(0.937-1.019)	0.284928		0.945	(0.860-1.039)	0.247387	0.987	(0.939-1.036)	0.587923	0.457094
rs12058802	1	91923254	CDC7	7455	7795	G	A	0.490623		0.9652	(0.926-1.006)	0.098023		0.938	(0.852-1.033)	0.19255	0.974	(0.927-1.022)	0.277764	0.520451
rs522712	1	91943207	CDC7	7454	7797	A	C	0.372894		1.001	(0.959-1.044)	0.982953		1.045	(0.949-1.151)	0.368683	0.988	(0.939-1.039)	0.632118	0.330919
rs13447450	1	91965850	CDC7	7454	7797	G	A	0.367845		0.9954	(0.953-1.039)	0.786228		1.03	(0.931-1.139)	0.563664	0.985	(0.936-1.037)	0.568975	0.462847
rs13447454	1	91966406	CDC7	7436	7794	G	A	0.129744		1.058	(0.993-1.128)	0.0756621		1.04	(0.901-1.201)	0.587986	1.064	(0.987-1.145)	0.102449	0.794745
rs12125947	1	91990487	CDC7	7453	7795	A	G	0.467963		1.026	(0.984-1.069)	0.253045		1.051	(0.953-1.157)	0.31794	1.019	(0.97-1.07)	0.459916	0.59572
rs2911571	1	104108743	SSX2IP	7452	7794	G	A	0.144202		1.008	(0.951-1.068)	0.770648		0.938	(0.817-1.079)	0.373285	1.029	(0.962-1.101)	0.40312	0.264126
rs6674384	1	114455907	PTPN22:BCL2L15:AP4B1:DCLRE1B:HIPK1	7453	7793	G	A	0.28132		0.9767	(0.932-1.023)	0.368503		0.931	(0.839-1.033)	0.180561	0.991	(0.938-1.046)	0.7343	0.3194
rs11811771	1	114463049	PTPN22:BCL2L15:AP4B1:DCLRE1B:HIPK1	7455	7797	A	G	0.425288		1.027	(0.985-1.07)	0.242895		1.079	(0.983-1.183)	0.108153	1.011	(0.963-1.061)	0.653593	0.240955
rs11102707	1	114493583	AP4B1:DCLRE1B:HIPK1:OLFML3	7447	7791	G	A	0.234151		0.9738	(0.926-1.024)	0.330608		0.918	(0.820-1.027)	0.136587	0.991	(0.934-1.051)	0.758731	0.253484
rs12093351	1	114529464	HIPK1:OLFML3	7451	7796	T	A	0.000229553		1.881	(0.383-9.232)	0.421295		NA	(NA-NA)	NA	NA	(NA-NA)	NA	NA
rs471144	1	152454255	LCE5A:CRCT1	7453	7796	A	C	0.0740376		1.071	(0.987-1.161)	0.10034		1.263	(1.07-1.491)	0.00586604	1.014	(0.922-1.115)	0.767277	0.026997
rs2805053	1	162781787	DDR2:HSD17B7:C1orf110	7440	7784	A	G	0.488111		1.018	(0.976-1.06)	0.418989		0.983	(0.896-1.079)	0.728168	1.028	(0.979-1.079)	0.260142	0.425527
rs6673329	1	162794500	DDR2:HSD17B7:C1orf110	7422	7761	G	A	0.0210762		NA	(NA-NA)	0.0149245		0.839	(0.611-1.153)	0.280638	0.838	(0.706-0.9934)	0.041733	0.988142
rs2028706	1	211831380	NEK2	7455	7797	A	C	0.233412		1.012	(0.964-1.061)	0.614788		1	(0.896-1.121)	0.965388	1.015	(0.958-1.074)	0.618416	0.858732
rs697004	1	211842808	NEK2	7455	7796	C	A	0.316176		0.9848	(0.942-1.03)	0.505024		0.997	(0.899-1.107)	0.966575	0.981	(0.930-1.034)	0.471269	0.784149
rs1136410	1	226555302	PARP1	7455	7796	A	G	0.161		1.039	(0.981-1.101)	0.209		0.997	(0.873-1.137)	0.961	1.052	(0.984-1.125)	0.134	0.487
rs11806633	1	227308416	CDC42BPA	7455	7797	A	G	0.0645489		1.128	(1.039-1.225)	0.00479372		1.095	(0.904-1.325)	0.351787	1.138	(1.033-1.254)	0.00903953	0.733746
rs6676779	1	243875486	AKT3	7453	7797	A	G	0.136033		1.038	(0.977-1.102)	0.241027		1.007	(0.875-1.158)	0.926646	1.047	(0.975-1.123)	0.201841	0.639803
rs2063018	2	28318008	BRE	7455	7797	A	G	0.29		1.054	(1.008-1.103)	0.022		1.002	(0.901-1.113)	0.975	1.071	(1.016-1.129)	0.011	0.288
rs6721310	2	28319320	BRE	7454	7793	G	A	0.338722		1.064	(1.018-1.111)	0.00537592		0.98	(0.884-1.088)	0.7131	1.089	(1.035-1.146)	0.000961643	0.0879228
rs1421	2	47613870	EPCAM:MIR559:MSH2	7455	7797	A	G	0.120148		0.9866	(0.927-1.05)	0.703052		1.039	(0.895-1.206)	0.614342	0.971	(0.901-1.046)	0.437398	0.448713
rs10495944	2	47703290	MSH2:KCNK12	7455	7797	G	A	0.119361		0.9741	(0.915-1.037)	0.444185		1.043	(0.898-1.211)	0.580579	0.954	(0.884-1.028)	0.214916	0.320648
rs11903456	2	58393836	VRK2:FANCL	7424	7765	G	A	0.212028		1.002	(0.953-1.053)	0.906835		1.015	(0.905-1.138)	0.798549	0.998	(0.941-1.059)	0.951053	0.807526
rs768298	2	58410972	VRK2:FANCL	7454	7797	G	A	0.298276		0.9783	(0.935-1.023)	0.340943		1.057	(0.956-1.167)	0.279813	0.955	(0.906-1.007)	0.0885796	0.0926914
rs10490250	2	58509628	FANCL	7455	7797	A	C	0.194958		0.9767	(0.927-1.028)	0.387826		0.98	(0.868-1.107)	0.75147	0.975	(0.917-1.037)	0.428826	0.942442
rs2305354	2	100019496	EIF5B:REV1	7451	7796	G	A	0.447072		1.057	(1.015-1.1)	0.00712664		0.997	(0.905-1.1)	0.963198	1.075	(1.025-1.128)	0.00296643	0.199641
rs4075604	2	173387668	Intergenic	7455	7796	G	A	0.22		1.001	(0.952-1.052)	0.996		0.97	(0.862-1.091)	0.608	1.01	(0.952-1.071)	0.737	0.562
rs12052479	2	173404804	ITGA6:PDK1	7454	7795	C	A	0.216047		1	(0.951-1.051)	0.971958		0.965	(0.858-1.086)	0.561682	1.01	(0.952-1.072)	0.731762	0.521665
rs17702263	2	173459590	PDK1	7454	7796	A	G	0.145443		1.045	(0.986-1.108)	0.146399		1.013	(0.884-1.161)	0.849619	1.055	(0.984-1.131)	0.127638	0.622191
rs12464787	2	179440029	MIR548N:TTN	7455	7797	G	A	0.283996		1.025	(0.979-1.074)	0.250902		1.076	(0.969-1.194)	0.167631	1.01	(0.957-1.066)	0.707091	0.311808
rs11674814	2	202153846	ALS2CR12	7448	7794	G	A	0.42		0.979	(0.939-1.02)	0.326		0.929	(0.843-1.024)	0.137	0.994	(0.946-1.044)	0.811	0.245
rs6757091	2	215672793	BARD1	7454	7797	G	C	0.39		1.022	(0.980-1.066)	0.271		1.111	(1.009-1.224)	0.033	0.997	(0.948-1.047)	0.891	0.059
rs6715570	2	215673440	BARD1	7453	7795	G	A	0.288825		1.009	(0.963-1.056)	0.670141		1.067	(0.961-1.184)	0.219904	0.991	(0.939-1.046)	0.75171	0.236389
rs12477063	2	215673664	BARD1	7452	7795	A	G	0.390601		1.02	(0.977-1.063)	0.326499		1.104	(1.002-1.217)	0.0445921	0.995	(0.947-1.046)	0.845946	0.0720363
rs13001462	2	215678346	BARD1	7454	7795	G	A	0.242016		0.9986	(0.951-1.048)	0.997193		1.046	(0.936-1.168)	0.424001	0.985	(0.929-1.042)	0.592408	0.360975
rs207928	2	217036441	XRCC5	7454	7797	G	A	0.422497		0.986	(0.945-1.028)	0.534229		1.036	(0.945-1.136)	0.447215	0.971	(0.925-1.02)	0.241812	0.236724
rs10205923	2	227614557	IRS1	7455	7796	G	A	0.0796997		0.9744	(0.903-1.051)	0.523178		1.02	(0.859-1.21)	0.822959	0.961	(0.878-1.051)	0.380712	0.559945
rs16822647	2	227651123	IRS1:RHBDD1	7455	7796	A	G	0.080421		0.9703	(0.899-1.047)	0.454748		0.957	(0.802-1.142)	0.625364	0.974	(0.890-1.066)	0.567846	0.864871
rs726379	2	231685198	CAB39:ITM2C	7454	7794	A	G	0.260034		0.9766	(0.931-1.024)	0.331157		0.868	(0.778-0.9679)	0.0108239	1.011	(0.956-1.067)	0.704434	0.0179605
rs4663992	2	234889177	TRPM8	7451	7794	C	A	0.341948		0.9846	(0.942-1.028)	0.48085		1.011	(0.912-1.12)	0.834843	0.977	(0.927-1.029)	0.373315	0.577926
rs7609252	2	111419426	RGPD8:BUB1	7455	7797	A	G	0.028193		1.001	(0.884-1.132)	0.981745		0.944	(0.703-1.269)	0.705611	1.017	(0.880-1.175)	0.817619	0.673444
rs3769823	2	202122995	CASP10:CASP8:ALS2CR12	7455	7796	G	A	0.318274		1.08	(1.033-1.129)	0.000723221		1.123	(1.018-1.24)	0.0209494	1.068	(1.014-1.124)	0.0131933	0.386128
rs6735656	2	202124502	CASP10:CASP8:ALS2CR12	7451	7787	A	C	0.285077		1.076	(1.028-1.126)	0.00173241		1.149	(1.038-1.27)	0.00708615	1.055	(0.999-1.113)	0.0504933	0.159285
rs11688692	2	202189451	CASP8:ALS2CR12	7453	7796	A	G	0.420028		0.9767	(0.937-1.018)	0.278583		0.927	(0.841-1.021)	0.123687	0.992	(0.944-1.042)	0.746144	0.241812
rs13066757	3	10045030	TMEM111:LOC401052:CIDECP:FANCD2	7433	7777	C	A	0.167324		1.036	(0.981-1.094)	0.230657		1.068	(0.940-1.213)	0.31347	1.027	(0.962-1.095)	0.423602	0.609708
rs7626117	3	10140671	FANCD2:C3orf24:C3orf10:VHL	7454	7796	G	A	0.176426		1.015	(0.962-1.071)	0.625908		1.039	(0.919-1.174)	0.541645	1.008	(0.946-1.073)	0.803471	0.681627
rs4103004	3	20042834	RAB5A:C3orf48:KAT2B	7455	7796	G	A	0.391843		0.9848	(0.944-1.027)	0.462424		0.872	(0.790-0.9635)	0.00697654	1.021	(0.970-1.073)	0.423964	0.00812824
rs13099560	3	48204768	CDC25A	7387	7730	A	G	0.351227		1.03	(0.985-1.076)	0.166313		1.044	(0.945-1.154)	0.392171	1.025	(0.973-1.08)	0.34472	0.758855
rs13073141	3	51410485	DOCK3:MANF:RBM15B:VPRBP	7454	7796	A	G	0.150787		1.019	(0.9619-1.079)	0.550172		1.071	(0.939-1.222)	0.305968	1.003	(0.937-1.075)	0.921944	0.409759
rs6807775	3	65133697		7455	7796	G	A	0.347223		0.9921	(0.9504-1.036)	0.746162		0.987	(0.8951-1.09)	0.804672	0.994	(0.944-1.045)	0.799794	0.920186
rs16838754	3	131843104		7455	7797	A	G	0.136081		0.9736	(0.9169-1.034)	0.408567		0.99	(0.8712-1.126)	0.880633	0.969	(0.903-1.039)	0.373225	0.774458
rs4241370	3	133794199	SLCO2A1	7450	7797	A	C	0.459074		1.018	(0.9767-1.06)	0.430503		1.019	(0.9242-1.123)	0.706696	1.017	(0.968-1.069)	0.496877	0.977307
rs4552343	3	133842112	RYK	7455	7797	A	G	0.0693352		1.049	(0.9661-1.14)	0.258688		1.025	(0.8472-1.241)	0.796592	1.057	(0.958-1.165)	0.26605	0.79048
rs7639683	3	133973731	RYK	7435	7777	A	G	0.451223		0.9954	(0.9552-1.037)	0.774556		1.034	(0.9419-1.136)	0.478929	0.984	(0.936-1.033)	0.514799	0.374372
rs13082648	3	142129008	XRN1:ATR	7453	7795	G	A	0.423531		0.9863	(0.9465-1.028)	0.488294		1.066	(0.967-1.175)	0.199231	0.963	(0.917-1.012)	0.136852	0.0848743
rs13323290	3	15467029	METTL6:EAF1:COLQ	7418	7759	G	A	0.0625618		1.092	(1.007-1.185)	0.0408154		1.116	(0.9236-1.348)	0.256048	1.085	(0.984-1.196)	0.100916	0.806812
rs798755	4	1720824	FAM53A:SLBP:TMEM129:TACC3	7453	7790	G	A	0.202618		1.021	(0.9705-1.074)	0.403563		0.991	(0.8812-1.116)	0.888773	1.03	(0.970-1.093)	0.327818	0.586528
rs2854915	4	1721654	FAM53A:SLBP:TMEM129:TACC3	7425	7721	A	G	0.448006		1.023	(0.9819-1.067)	0.284596		1.01	(0.9177-1.112)	0.833816	1.027	(0.978-1.079)	0.276949	0.77125
rs1389999	4	14858341		7454	7795	A	G	0.346023		0.9404	(0.9009-0.9817)	0.00527319		0.937	(0.849-1.035)	0.20198	0.941	(0.894-0.990)	0.0201598	0.948205
rs9998559	4	15113921	CPEB2	7442	7784	G	C	0.401287		0.9904	(0.9495-1.033)	0.636794		0.902	(0.8163-0.9981)	0.0457982	1.018	(0.968-1.07)	0.477442	0.0445657
rs2788865	4	26446006	RBPJ:CCKAR	7454	7796	A	G	0.387344		1.011	(0.9692-1.055)	0.639585		0.972	(0.883-1.072)	0.577864	1.023	(0.973-1.075)	0.368179	0.382235
rs1354360	4	70616322	SULT1B1	7449	7781	A	G	0.346783		1	(0.9582-1.045)	0.965404		0.998	(0.9046-1.102)	0.97699	1.001	(0.950-1.054)	0.970854	0.967628
rs1503721	4	70679571	SULT1E1	7455	7797	A	G	0.308124		0.9884	(0.9449-1.034)	0.567852		0.997	(0.9025-1.102)	0.953352	0.986	(0.935-1.039)	0.596112	0.849557
rs11099601	4	84382763	FAM175A	7454	7794	G	A	0.49		0.996	(0.9562-1.037)	0.894		0.988	(0.9007-1.084)	0.801	0.998	(0.951-1.047)	0.941	0.855
rs17355027	4	84388915	HELQ:MRPS18C:FAM175A	7454	7796	G	A	0.0996721		0.9496	(0.8861-1.018)	0.128826		0.962	(0.8295-1.117)	0.613715	0.946	(0.872-1.026)	0.178748	0.845544
rs971539	4	84433804	FAM175A:AGPAT9	7436	7779	G	A	0.492836		1.001	(0.961-1.043)	0.912195		0.976	(0.889-1.071)	0.609777	1.009	(0.961-1.058)	0.726232	0.554226
rs980455	4	103418957	NFKB1	7452	7792	A	G	0.377788		1.006	(0.964-1.049)	0.760034		1.033	(0.936-1.138)	0.519745	0.998	(0.949-1.049)	0.934933	0.563372
rs3774937	4	103434253	NFKB1	7453	7797	A	G	0.322623		1.013	(0.970-1.058)	0.55907		1.053	(0.953-1.163)	0.310864	1.001	(0.950-1.054)	0.967092	0.40457
rs230530	4	103453980	NFKB1	7450	7794	A	G	0.458377		0.9885	(0.949-1.029)	0.579643		0.989	(0.899-1.088)	0.820182	0.988	(0.941-1.038)	0.638203	0.991205
rs223497	4	103653976	MANBA	7452	7794	A	G	0.485078		1.003	(0.962-1.044)	0.941106		1.053	(0.957-1.158)	0.286075	0.988	(0.941-1.037)	0.62609	0.266437
rs150895	4	103712589	MANBA:UBE2D3	7454	7795	G	A	0.480195		1.023	(0.982-1.065)	0.322859		1.109	(1.009-1.219)	0.031786	0.998	(0.950-1.048)	0.940347	0.0645282
rs11946020	4	103944742	NHEDC1:NHEDC2	7453	7797	A	G	0.346689		1.011	(0.969-1.055)	0.642302		1.065	(0.962-1.177)	0.222994	0.995	(0.945-1.047)	0.850385	0.267018
rs6830624	4	104020422	NHEDC2:BDH2:CENPE	7455	7795	A	G	0.283148		0.968	(0.924-1.013)	0.16488		0.99	(0.893-1.1)	0.863882	0.961	(0.910-1.015)	0.150517	0.623485
rs7439493	4	110656730	CCDC109B:CASP6:PLA2G12A:CFI	7454	7796	G	A	0.422066		0.9911	(0.950-1.033)	0.651972		0.911	(0.823-1.007)	0.0691956	1.016	(0.967-1.067)	0.518338	0.0674915
rs4647610	4	185567931	CASP3:CCDC111:MLF1IP	7455	7796	G	A	0.137532		1.057	(0.995-1.122)	0.0753564		1.144	(1.004-1.304)	0.0432655	1.031	(0.959-1.108)	0.407939	0.190467
rs4647601	4	185570032	CASP3:CCDC111:MLF1IP	7452	7786	C	A	0.475948		0.9676	(0.928-1.009)	0.12486		0.903	(0.825-0.989)	0.0291963	0.988	(0.940-1.037)	0.621046	0.101424
rs13176284	5	34754248	RAI14	7455	7796	G	A	0.255918		1.039	(0.991-1.089)	0.118387		1.069	(0.958-1.193)	0.231928	1.03	(0.974-1.089)	0.292735	0.569214
rs2362974	5	36156654	LMBRD2:MIR580:SKP2:C5orf33	7454	7797	A	G	0.125238		1.026	(0.964-1.092)	0.381988		1.048	(0.911-1.206)	0.510325	1.02	(0.946-1.098)	0.604946	0.74521
rs7702272	5	36160854	LMBRD2:MIR580:SKP2:C5orf33	7421	7761	G	A	0.0595442		0.9939	(0.910-1.085)	0.857006		0.802	(0.640-1.004)	0.0547068	1.052	(0.951-1.164)	0.323784	0.0389511
rs3797306	5	43127925	ZNF131	7455	7797	A	G	0.125098		0.9645	(0.905-1.028)	0.241073		1.016	(0.875-1.178)	0.836575	0.949	(0.880-1.024)	0.175656	0.446979
rs13171253	5	43160433	ZNF131:MGC42105	7454	7794	G	A	0.125033		0.9666	(0.907-1.03)	0.268947		1.015	(0.875-1.178)	0.839944	0.952	(0.882-1.027)	0.201151	0.46914
rs29635	5	47249294		7444	7778	A	G	0.266654		1.022	(0.976-1.07)	0.390818		1.049	(0.946-1.162)	0.362996	1.014	(0.960-1.07)	0.614342	0.582444
rs12656399	5	56026843		7455	7796	A	G	0.103075		1.049	(0.980-1.122)	0.187487		1.203	(1.043-1.388)	0.011316	1.003	(0.9254-1.088)	0.933009	0.0378444
rs6453340	5	76962274	OTP:TBCA	7455	7797	C	A	0.0749082		0.9718	(0.900-1.048)	0.461908		0.938	(0.785-1.121)	0.483749	0.982	(0.898-1.074)	0.691283	0.669745
rs2652217	5	76980244	OTP:TBCA	7455	7797	G	A	0.402275		0.9669	(0.927-1.008)	0.127403		1.044	(0.947-1.15)	0.383861	0.945	(0.899-0.992)	0.0233806	0.0850319
rs2546163	5	76995054	TBCA	7431	7770	A	G	0.313729		0.9754	(0.933-1.019)	0.277547		1.063	(0.960-1.177)	0.234725	0.95	(0.901-1.001)	0.0525868	0.0632901
rs425463	5	79901952	ANKRD34B:DHFR:MTRNR2L2:MSH3	7430	7755	G	A	0.340171		1.058	(1.013-1.105)	0.00945564		1.038	(0.937-1.148)	0.475182	1.065	(1.012-1.121)	0.0161451	0.669234
rs12517451	5	79920073	Intergenic	7455	7796	G	A	0.25		1.049	(1.001-1.1)	0.043		1.1	(0.985-1.227)	0.091	1.035	(0.978-1.095)	0.232	0.359
rs1650697	5	79950781	DHFR:MTRNR2L2:MSH3	7443	7790	G	A	0.248178		1.052	(1.004-1.102)	0.0339851		1.099	(0.984-1.227)	0.091887	1.038	(0.981-1.098)	0.192812	0.387047
rs6151599	5	79951032	DHFR:MTRNR2L2:MSH3	7434	7791	A	G	0.0813465		1.082	(1.002-1.169)	0.0411719		0.916	(0.760-1.104)	0.359511	1.132	(1.037-1.236)	0.00565525	0.0509475
rs2706369	5	131932203	RAD50	7446	7774	C	A	0.00476347		0.9963	(0.763-1.301)	0.975134		0.548	(0.249-1.206)	0.135091	1.13	(0.845-1.509)	0.409105	0.0968902
rs17772583	5	131953510	RAD50:IL13	7454	7797	A	G	0.237591		0.9948	(0.947-1.045)	0.803236		0.991	(0.887-1.108)	0.878912	0.996	(0.940-1.055)	0.887789	0.94625
rs1432693	5	147609136	SPINK6:SPINK13	7454	7797	A	G	0.0765524		0.9786	(0.906-1.057)	0.54914		1.019	(0.852-1.219)	0.832852	0.966	(0.882-1.058)	0.458808	0.617075
rs7707008	5	170801952	MIR3912:NPM1:FGF18	7455	7797	G	A	0.169912		0.981	(0.928-1.036)	0.515697		1.083	(0.961-1.221)	0.189564	0.951	(0.890-1.015)	0.129624	0.0699582
rs4302608	5	170840504	MIR3912:NPM1:FGF18	7454	7796	G	A	0.434262		1.047	(1.005-1.09)	0.0323222		0.986	(0.895-1.087)	0.788605	1.065	(1.015-1.118)	0.0105832	0.188794
rs359445	5	173285204	CPEB4	7452	7792	A	G	0.16413		0.9827	(0.927-1.041)	0.561067		1.043	(0.916-1.187)	0.522071	0.965	(0.901-1.032)	0.300494	0.313232
rs7722173	5	176384683	UIMC1	7454	7796	A	G	0.05		1.048	(0.956-1.147)	0.314		1.065	(0.869-1.304)	0.542	1.042	(0.936-1.16)	0.448	0.858
rs726230	6	11200574	NEDD9	7454	7796	A	C	0.203508		0.9842	(0.935-1.035)	0.503865		0.956	(0.849-1.078)	0.466355	0.993	(0.935-1.053)	0.805723	0.603533
rs9468322	6	28231243	LOC222699:ZNF193:ZKSCAN4:NKAPL:ZNF187:PGBD1	7455	7795	G	A	0.0451148		1.022	(0.923-1.132)	0.652957		1.002	(0.799-1.256)	0.98711	1.029	(0.915-1.156)	0.635632	0.842225
rs3130000	6	30628082	PPP1R10:MRPS18B:ATAT1:C6orf136:DHX16:KIAA1949:NRM:MDC1	7451	7796	G	A	0.0771299		0.9654	(0.895-1.04)	0.389485		1.077	(0.912-1.271)	0.383329	0.9324	(0.850-1.023)	0.137742	0.163886
rs1077394	6	31610384	NCR3:AIF1:PRRC2A:SNORA38:BAG6:APOM:C6orf47:GPANK1:CSNK2B:LY6G5B:LY6G5C:ABHD16A		7797	A	G	0.305239		0.9851	(0.942-1.03)	0.510712		0.995	(0.899-1.102)	0.932425	0.982	(0.932-1.035)	0.493724	0.819125
rs1144708	6	31710020	ABHD16A:LY6G6F:LY6G6E:LY6G6D:LY6G6C:C6orf25:DDAH2:CLIC1:MSH5:C6orf26:C6orf27:VARS	7452	7791	G	A	0.351735		1.052	(1.008-1.097)	0.0258051		1.065	(0.963-1.177)	0.21853	1.048	(0.996-1.103)	0.0700009	0.795518
rs1480380	6	32913246	LOC100294145:HLA-DMB:HLA-DMA:BRD2	7455	7797	G	A	0.0735969		0.9911	(0.914-1.074)	0.856584		1.009	(0.843-1.208)	0.918152	0.986	(0.897-1.083)	0.763783	0.824076
rs206776	6	32953711	HLA-DMB:HLA-DMA:BRD2:HLA-DOA	7450	7793	G	A	0.318868		1.034	(0.989-1.081)	0.152632		1.01	(0.915-1.115)	0.837677	1.041	(0.989-1.096)	0.123766	0.608681
rs210170	6	33525680	BAK1:GGNBP1:C6orf227	7451	7791	G	A	0.347002		1.004	(0.961-1.049)	0.827902		0.974	(0.882-1.076)	0.608749	1.013	(0.962-1.067)	0.61574	0.509935
rs9296095	6	33542523	BAK1:GGNBP1:C6orf227:ITPR3	7451	7793	A	G	0.213855		1.043	(0.991-1.097)	0.119567		0.947	(0.840-1.068)	0.376073	1.072	(1.011-1.137)	0.0195012	0.0797985
rs396746	6	33557045	BAK1:GGNBP1:C6orf227:ITPR3	7446	7781	C	A	0.125468		0.9964	(0.936-1.06)	0.932839		1.023	(0.889-1.177)	0.748732	0.988	(0.918-1.063)	0.754449	0.680379
rs733590	6	36645203	CDKN1A	7452	7794	A	G	0.38925		1.018	(0.976-1.062)	0.413275		1.07	(0.970-1.18)	0.175774	1.003	(0.953-1.055)	0.898751	0.276138
rs3176326	6	36647289	CDKN1A	7452	7793	G	A	0.216268		1.01	(0.961-1.062)	0.696148		1.071	(0.955-1.2)	0.240442	0.993	(0.935-1.053)	0.803098	0.266824
rs2269058	6	37324857	TBC1D22B:RNF8	7454	7795	A	C	0.494393		0.9956	(0.955-1.037)	0.897267		1.023	(0.929-1.125)	0.641335	0.987	(0.940-1.036)	0.608955	0.537229
rs2284923	6	37348920	TBC1D22B:RNF8	7455	7796	G	A	0.464822		1.008	(0.967-1.051)	0.765121		0.948	(0.863-1.042)	0.269754	1.027	(0.978-1.078)	0.281466	0.157195
rs17254634	6	80751942	TTK	7447	7790	G	A	0.181827		1.009	(0.95-1.063)	0.716087		0.966	(0.853-1.096)	0.596439	1.021	(0.959-1.087)	0.509302	0.465767
rs1268166	6	109008232	FOXO3	7454	7797	A	G	0.351682		0.9702	(0.929-1.012)	0.198561		0.983	(0.891-1.084)	0.732862	0.966	(0.918-1.016)	0.178748	0.765197
rs9386747	6	109038738	FOXO3:NCRNA00222	7454	7794	A	G	0.112769		0.9877	(0.92-1.055)	0.737996		1.066	(0.924-1.23)	0.379753	0.964	(0.892-1.042)	0.35675	0.242673
rs12208908	6	109048366	FOXO3:NCRNA00222	7455	7795	G	A	0.213115		0.9996	(0.950-1.051)	0.962233		0.91	(0.805-1.03)	0.136498	1.027	(0.967-1.09)	0.380465	0.102707
rs465969	6	111655530	REV3L	7427	7769	G	A	0.0901882		1.003	(0.934-1.077)	0.927284		1.034	(0.877-1.219)	0.688329	0.993	(0.912-1.082)	0.877753	0.685591
rs2179070	6	111885752	LOC643749:TRAF3IP2	7455	7797	A	G	0.06845		1.02	(0.941-1.105)	0.643278		1.119	(0.930-1.346)	0.23291	0.99	(0.899-1.09)	0.842343	0.27533
rs13210247	6	111922720	LOC643749:TRAF3IP2	7451	7792	A	G	0.0713442		1.044	(0.964-1.129)	0.298389		1.069	(0.892-1.282)	0.469352	1.036	(0.943-1.137)	0.458113	0.770764
rs809193	6	112020414	FYN	7455	7797	A	G	0.222168		1.01	(0.96-1.062)	0.737558		1.002	(0.892-1.126)	0.972807	1.012	(0.954-1.073)	0.69399	0.887537
rs2280152	6	112375889	WISP3:TUBE1:C6orf225	7445	7792	A	G	0.273217		0.9965	(0.951-1.043)	0.841742		1.092	(0.982-1.213)	0.103485	0.969	(0.917-1.023)	0.256786	0.0603405
rs3777947	6	112433664	WISP3:TUBE1:C6orf225:LAMA4	7451	7796	A	G	0.271693		0.9893	(0.945-1.036)	0.614197		1.087	(0.978-1.208)	0.119718	0.961	(0.909-1.015)	0.150715	0.0511303
rs4710127	6	167276041	RPS6KA2	7416	7751	G	A	0.181974		0.9531	(0.903-1.006)	0.0726977		0.978	(0.868-1.104)	0.726661	0.946	(0.887-1.008)	0.0841952	0.631969
rs9457245	6	167340715	RNASET2	7454	7797	G	A	0.0773392		0.9201	(0.851-0.9945)	0.0398756		0.946	(0.795-1.126)	0.535311	0.913	(0.833-1)	0.0503129	0.728926
rs12666800	7	45906594	IGFBP1:IGFBP3	7449	7788	G	A	0.115771		0.9514	(0.893-1.014)	0.129707		0.84	(0.715-0.9876)	0.0347585	0.986	(0.915-1.061)	0.701129	0.0953886
rs7804722	7	92288106	CDK6	7452	7797	A	G	0.303102		1.021	(0.975-1.069)	0.369521		1.067	(0.967-1.177)	0.196125	1.007	(0.955-1.063)	0.788189	0.326282
rs6968090	7	96318575	SHFM1	7405	7724	A	G	0.209829		0.978	(0.929-1.029)	0.356776		0.899	(0.798-1.012)	0.0784367	1.002	(0.944-1.064)	0.935388	0.122192
rs10241838	7	96343665	SHFM1	7439	7779	A	G	0.340156		0.9986	(0.955-1.044)	0.954235		0.978	(0.888-1.078)	0.655934	1.005	(0.954-1.058)	0.856935	0.642028
rs11574158	8	30891353	PURG:WRN	7454	7796	G	A	0.0316721		0.9181	(0.814-1.035)	0.190347		0.971	(0.752-1.255)	0.825907	0.902	(0.779-1.043)	0.163343	0.633907
rs11574398	8	31025343	WRN	7454	7796	G	A	0.360426		1.016	(0.973-1.06)	0.508202		1.001	(0.906-1.106)	0.978778	1.02	(0.969-1.073)	0.441955	0.758063
rs13279327	8	48442384	KIAA0146	7454	7795	A	G	0.309266		0.9906	(0.947-1.035)	0.700247		1	(0.904-1.106)	0.995861	0.988	(0.938-1.041)	0.660596	0.842265
rs6982040	8	48708742	PRKDC	7445	7790	G	A	0.00380702		1.077	(0.805-1.441)	0.618144		1.191	(0.575-2.468)	0.637369	1.043	(0.715-1.52)	0.828368	0.772622
rs1011683	8	91020834	NBN:DECR1	7454	7796	A	C	0.325705		1.003	(0.960-1.048)	0.887581		1.018	(0.923-1.121)	0.726232	0.999	(0.949-1.051)	0.972983	0.753045
rs2450551	8	95351843	RAD54B	7451	7790	C	A	0.0455023		0.9046	(0.817-1.002)	0.0528519		1.035	(0.838-1.279)	0.746144	0.866	(0.767-0.975)	0.0181979	0.156678
rs10104637	8	95393925	RAD54B	7455	7797	A	G	0.0431747		1.018	(0.919-1.127)	0.578598		1.046	(0.833-1.312)	0.698344	1.01	(0.895-1.138)	0.875393	0.794331
rs2445614	8	128212594		7455	7796	G	A	0.246902		1.03	(0.981-1.08)	0.246632		1.13	(1.015-1.259)	0.0261058	1	(0.944-1.059)	0.996625	0.0598694
rs12004745	9	21812349	MTAP	7455	7797	T	A	0.05		1.007	(0.915-1.108)	0.866		1.008	(0.818-1.242)	0.941	1.007	(0.901-1.126)	0.899	0.996
rs2039971	9	21815166	MTAP	7452	7790	C	A	0.0508135		1.017	(0.923-1.12)	0.679204		1.031	(0.836-1.269)	0.775853	1.013	(0.904-1.134)	0.82476	0.887761
rs2069422	9	22008026	C9orf53:CDKN2A:CDKN2B-AS1:CDKN2B	7451	7792	A	C	0.111264		1.042	(0.975-1.113)	0.212012		0.795	(0.672-0.9419)	0.00792653	1.118	(1.038-1.204)	0.00321192	0.000462772
rs10972278	9	35000289	KIAA1045:DNAJB5:C9orf131	7454	7796	A	G	0.298033		1.021	(0.975-1.069)	0.331788		1.001	(0.900-1.112)	0.990771	1.027	(0.973-1.084)	0.322916	0.672925
rs595429	9	35055669	C9orf131:VCP:FANCG:PIGO:STOML2:KIAA1539	7455	7795	G	A	0.457016		0.9697	(0.930-1.011)	0.156773		0.938	(0.851-1.034)	0.197603	0.979	(0.932-1.028)	0.399013	0.457135
rs4877005	9	92325852	LOC100129066	7454	7795	A	G	0.379074		0.9936	(0.952-1.036)	0.732869		0.948	(0.860-1.046)	0.287136	1.008	(0.958-1.059)	0.769456	0.304129
rs16923815	9	100480357	NCBP1:XPA	7455	7797	G	A	0.300879		1.031	(0.986-1.079)	0.186014		1.006	(0.907-1.116)	0.90805	1.039	(0.985-1.095)	0.15331	0.602327
rs6597642	9	133725767	ABL1:QRFP	7455	7796	G	A	0.129434		1.045	(0.982-1.11)	0.179652		1.151	(1.008-1.315)	0.0380228	1.013	(0.943-1.089)	0.718432	0.109046
rs1056171	9	133761001	ABL1:QRFP:FIBCD1	7436	7775	A	G	0.48054		0.9934	(0.954-1.034)	0.698683		1.038	(0.945-1.141)	0.432724	0.98	(0.933-1.029)	0.419613	0.309689
rs11535662	9	140143801	TPRN:TMEM203:NDOR1:RNF208:C9orf169:LOC643596:SLC34A3:TUBB2C:FAM166A:C9orf173:COBRA1:C9orf167	7453	7794	G	A	0.0682429		0.9862	(0.907-1.071)	0.773053		1.166	(0.979-1.387)	0.0845079	0.934	(0.843-1.033)	0.1845	0.0397154
rs28631372	9	43656535	TMEM203:NDOR1:RNF208:C9orf169:LOC643596:SLC34A3:TUBB2C:FAM166A:C9orf173:COBRA1:C9orf167:NRARP	7447	7773	G	A	0.25956		0.9682	(0.923-1.015)	0.170019		0.966	(0.865-1.079)	0.544042	0.969	(0.915-1.025)	0.267991	0.972378
rs1937881	10	5066511	AKR1C1:AKR1C2	7455	7797	G	A	0.18296		0.9761	(0.925-1.029)	0.365461		1.107	(0.983-1.246)	0.0920587	0.938	(0.879-0.999)	0.0479996	0.0208894
rs788209	10	27434716	ANKRD26:YME1L1:MASTL:ACBD5	7430	7779	A	C	0.145835		1.013	(0.956-1.074)	0.670546		0.942	(0.819-1.084)	0.406743	1.035	(0.965-1.109)	0.335618	0.267796
rs10764686	10	27475494	YME1L1:MASTL:ACBD5	7199	7500	G	A	0.353357		1.012	(0.969-1.056)	0.567652		1.027	(0.930-1.134)	0.592472	1.007	(0.956-1.061)	0.782821	0.742088
rs1904415	10	62540453	CDK1	7394	7721	A	C	0.241747		1.012	(0.965-1.062)	0.582017		1.052	(0.943-1.174)	0.362099	1.001	(0.945-1.059)	0.984208	0.443426
rs12411618	10	94052164	CPEB3:MARCH5	7454	7794	G	A	0.139067		1.025	(0.967-1.086)	0.381401		1.092	(0.960-1.241)	0.180561	1.005	(0.938-1.077)	0.881054	0.287562
rs6584354	10	102007714	CHUK:CWF19L1:SNORA12:BLOC1S2:PKD2L1	7424	7773	A	C	0.485458		0.9773	(0.938-1.018)	0.290886		0.948	(0.862-1.043)	0.274524	0.986	(0.940-1.035)	0.572812	0.48491
rs11574852	10	104161475	GBF1:NFKB2:PSD:FBXL15:CUEDC2:MIR146B:C10orf95	7344	7682	A	C	0.0349062		0.9044	(0.804-1.017)	0.0810843		1.078	(0.848-1.37)	0.537978	0.853	(0.737-0.985)	0.0305869	0.117226
rs4147155	10	104536771	SFXN2:C10orf26	7455	7796	G	A	0.143007		1.023	(0.965-1.084)	0.450053		1.029	(0.905-1.168)	0.665593	1.021	(0.953-1.094)	0.546458	0.926513
rs2419851	10	115380608	HABP2:NRAP	7455	7797	C	A	0.115821		0.977	(0.915-1.043)	0.530642		0.907	(0.783-1.052)	0.198823	0.998	(0.925-1.076)	0.962243	0.277356
rs2227309	10	115489167	CASP7	7444	7780	G	A	0.25		1.001	(0.954-1.05)	0.988		0.992	(0.886-1.109)	0.883	1.004	(0.948-1.062)	0.898	0.857
rs4353229	10	115489589	CASP7:C10orf81	7434	7766	A	G	0.255066		1.001	(0.953-1.05)	0.998909		0.986	(0.882-1.103)	0.809766	1.005	(0.949-1.063)	0.867391	0.782195
rs1127687	10	115490109	CASP7:C10orf81	7453	7789	G	A	0.228087		0.9858	(0.938-1.035)	0.596114		0.947	(0.842-1.065)	0.364917	0.998	(0.941-1.057)	0.931356	0.459669
rs12255933	10	126579158		7454	7797	C	A	0.189004		1.052	(0.999-1.106)	0.0566693		1.023	(0.899-1.163)	0.729686	1.061	(0.997-1.127)	0.0583385	0.638583
rs9667035	11	1907653	LSP1	7419	7750	A	G	0.32		1.004	(0.960-1.049)	0.808		1.001	(0.900-1.112)	0.99	1.005	(0.953-1.059)	0.867	0.952
rs11606458	11	6623918	DNHD1:RRP8:ILK:TAF10:TPP1:DCHS1	7455	7797	G	A	0.247148		0.9959	(0.950-1.044)	0.867039		1.097	(0.985-1.222)	0.0908075	0.966	(0.913-1.022)	0.233898	0.0523046
rs2255538	11	6629042	DNHD1:RRP8:ILK:TAF10:TPP1:DCHS1	7442	7786	G	A	0.260376		0.9924	(0.947-1.039)	0.748969		1.07	(0.964-1.188)	0.203231	0.97	(0.917-1.025)	0.272126	0.119109
rs7928685	11	6773439	GVINP1:OR2AG2:OR2AG1:OR6A2	7455	7797	A	G	0.164929		1.018	(0.962-1.076)	0.534793		0.985	(0.866-1.122)	0.829342	1.027	(0.962-1.097)	0.42108	0.594611
rs10838158	11	43752522	HSD17B12	7442	7781	A	G	0.309827		0.9973	(0.954-1.042)	0.907926		1.082	(0.978-1.195)	0.123213	0.973	(0.923-1.025)	0.299819	0.0752785
rs7110437	11	43780553	HSD17B12	7454	7797	A	C	0.309291		0.9967	(0.953-1.042)	0.885444		1.075	(0.973-1.189)	0.154221	0.974	(0.924-1.026)	0.317069	0.0965275
rs7118659	11	43817125	HSD17B12	7454	7794	A	G	0.312992		0.9979	(0.954-1.043)	0.925963		1.09	(0.986-1.204)	0.0901328	0.971	(0.921-1.023)	0.270936	0.052524
rs7131110	11	43846850	HSD17B12	7455	7796	G	A	0.31		0.997	(0.953-1.042)	0.889		1.092	(0.989-1.205)	0.08	0.969	(0.919-1.021)	0.239	0.043
rs4647709	11	47237359	ARFGAP2:PACSIN3:DDB2:ACP2:NR1H3	7455	7795	G	A	0.0881311		1.073	(0.998-1.154)	0.043232		1.118	(0.953-1.311)	0.170448	1.06	(0.973-1.154)	0.178869	0.575236
rs326222	11	47259668	DDB2:ACP2:NR1H3:MADD	7455	7796	G	A	0.277195		0.9874	(0.943-1.033)	0.56759		0.911	(0.818-1.016)	0.0936784	1.011	(0.958-1.066)	0.69493	0.109529
rs2279238	11	47282024	DDB2:ACP2:NR1H3:MADD	7455	7796	G	A	0.145958		0.9696	(0.914-1.028)	0.301525		0.912	(0.796-1.046)	0.190338	0.987	(0.921-1.057)	0.70375	0.338132
rs660442	11	64042997	TRPT1:NUDT22:DNAJC4:VEGFB:FKBP2:PPP1R14B:PLCB3:BAD:GPR137:KCNK4:C11orf20:ESRRA:TRMT112:PRDX5	7450	7791	G	A	0.209238		0.9767	(0.928-1.027)	0.346751		1.067	(0.950-1.199)	0.271927	0.95	(0.894-1.009)	0.0972544	0.0979873
rs4244812	11	65480768	KAT5:RNASEH2C	7448	7792	A	G	0.481594		0.9967	(0.956-1.039)	0.819008		0.971	(0.884-1.068)	0.550065	1.004	(0.957-1.054)	0.859196	0.554566
rs656040	11	65621057	SNX32:CFL1:MUS81:EFEMP2:CTSW:FIBP:CCDC85B:FOSL1	7452	7794	G	A	0.331825		1.014	(0.971-1.059)	0.527731		1.026	(0.928-1.135)	0.612327	1.011	(0.959-1.064)	0.691655	0.797312
rs3212907	11	69468776	CCND1:ORAOV1:FGF19	7453	7796	G	A	0.0375107		1.016	(0.910-1.133)	0.765729		0.814	(0.615-1.078)	0.150814	1.076	(0.951-1.217)	0.242845	0.0851371
rs6592537	11	70172975	PPFIA1:MIR548K	7454	7796	G	A	0.11482		0.9873	(0.926-1.052)	0.702043		0.98	(0.845-1.136)	0.791701	0.989	(0.918-1.066)	0.780425	0.917192
rs4435030	11	74806005	Intergenic	7453	7795	C	A	0.38		1.03	(0.988-1.074)	0.182		0.967	(0.877-1.069)	0.528	1.049	(0.999-1.102)	0.055	0.175
rs12271212	11	77197817	PAK1	7455	7797	G	A	0.230691		0.985	(0.937-1.035)	0.545042		0.95	(0.846-1.066)	0.385591	0.996	(0.939-1.055)	0.880738	0.498795
rs2957873	11	85156821	PACSIN3:DDB2:ACP2:NR1H3:MADD	7455	7796	A	G	0.182152		0.9619	(0.911-1.015)	0.165834		0.913	(0.804-1.038)	0.165087	0.977	(0.916-1.041)	0.466061	0.382048
rs10765682	11	94198269	MRE11A:ANKRD49:LOC643037	7455	7797	A	G	0.100347		1.036	(0.968-1.109)	0.312346		0.951	(0.812-1.115)	0.538461	1.061	(0.981-1.148)	0.134134	0.238405
rs511484	11	100918433	PGR	7449	7789	G	C	0.250328		0.964	(0.919-1.011)	0.133826		0.963	(0.867-1.071)	0.489875	0.964	(0.911-1.02)	0.204211	0.992301
rs6589007	11	108040104	ACAT1:NPAT	7451	7797	G	A	0.415005		1.062	(1.019-1.107)	0.00467328		1.083	(0.985-1.19)	0.098233	1.056	(1.003-1.109)	0.0286753	0.6635
rs183459	11	108089197	NPAT:ATM	7447	7789	A	C	0.408047		1.061	(1.018-1.105)	0.00579705		1.084	(0.986-1.191)	0.0932706	1.054	(1.003-1.107)	0.0370307	0.617427
rs228592	11	108123189	NPAT:ATM	7449	7792	A	C	0.417755		1.061	(1.018-1.106)	0.00549535		1.083	(0.985-1.19)	0.0964672	1.055	(1.004-1.108)	0.0338354	0.635482
rs17140162	11	125490616	EI24:STT3A:CHEK1	7455	7797	C	A	0.000721217		0.8997	(0.479-1.689)	0.828399		0.67	(0.131-3.417)	0.630562	0.99	(0.450-2.175)	0.97913	0.702097
rs7967755	12	986004	WNK1:RAD52	7454	7797	A	G	0.156613		0.9268	(0.876-0.98)	0.00749501		0.959	(0.842-1.093)	0.535364	0.917	(0.857-0.979)	0.010175	0.555532
rs2066827	12	12871099	GPR19:CDKN1B:APOLD1:MIR613	7445	7791	A	C	0.24534		0.9953	(0.949-1.043)	0.886076		0.976	(0.870-1.094)	0.676493	1.001	(0.946-1.058)	0.96993	0.71088
rs1291351	12	13084082	CDKN1B	7455	7796	C	G	0.03		0.928	(0.816-1.055)	0.251		1.002	(0.756-1.327)	0.988	0.905	(0.775-1.057)	0.208	0.553
rs708170	12	27237085	C12orf71	7442	7786	G	A	0.309758		0.9636	(0.922-1.007)	0.109698		0.961	(0.864-1.07)	0.470842	0.964	(0.914-1.016)	0.172625	0.965461
rs922275	12	27402709	STK38L	7455	7797	G	A	0.363821		1.011	(0.968-1.055)	0.67935		1.053	(0.954-1.162)	0.302078	0.998	(0.948-1.05)	0.941583	0.363316
rs10842893	12	27422886	STK38L	7445	7785	G	A	0.0990151		0.9631	(0.898-1.033)	0.352994		0.904	(0.764-1.07)	0.242328	0.981	(0.903-1.064)	0.642567	0.417338
rs17497606	12	27494449	STK38L:ARNTL2	7445	7789	G	A	0.214947		0.9886	(0.939-1.04)	0.654694		1.015	(0.902-1.142)	0.799931	0.981	(0.923-1.041)	0.522986	0.62126
rs10876864	12	56401085	SILV:CDK2:RAB5B:SUOX:IKZF4:RPS26	7440	7789	A	G	0.404885		1.004	(0.962-1.047)	0.846815		0.998	(0.910-1.095)	0.971808	1.006	(0.957-1.057)	0.820816	0.892714
rs2069502	12	58144665	OS9:AGAP2:LOC100130776:TSPAN31:CDK4:MARCH9:CYP27B1:METTL1:FAM119B:TSFM:AVIL	7452	7796	G	A	0.312336		0.9992	(0.955-1.045)	0.978988		1.002	(0.900-1.114)	0.973905	0.998	(0.947-1.052)	0.951739	0.957291
rs703842	12	58162739	CYP27B1/METTL1	7419	7750	A	G	0.32		1.004	(0.960-1.049)	0.808		1.001	(0.900-1.112)	0.99	1.005	(0.953-1.059)	0.867	0.952
rs12368451	12	99115661	APAF1:ANKS1B	7257	7591	A	G	0.448815		0.9841	(0.943-1.027)	0.514172		0.986	(0.897-1.085)	0.785444	0.983	(0.935-1.033)	0.507122	0.949351
rs2162679	12	102871259	IGF1	7455	7797	A	G	0.164437		1.055	(0.998-1.115)	0.058857		0.957	(0.841-1.09)	0.512775	1.085	(1.018-1.157)	0.0118245	0.10079
rs10160981	12	110904075	ARPC3:GPN3:C12orf24:VPS29:RAD9B	7455	7797	G	A	0.19581		1.001	(0.950-1.054)	0.994561		1.01	(0.894-1.141)	0.873449	0.998	(0.939-1.061)	0.957046	0.873721
rs1502337	12	111062852	PPTC7:TCTN1:HVCN1	7453	7796	G	A	0.335661		1.037	(0.992-1.083)	0.113875		0.992	(0.897-1.098)	0.885024	1.05	(0.998-1.105)	0.0592591	0.344828
rs904654	12	120189888	CIT:MIR1178	7454	7795	G	A	0.482851		1.015	(0.974-1.056)	0.496823		1.051	(0.955-1.155)	0.305738	1.004	(0.957-1.053)	0.872169	0.419078
rs6490269	12	120207175	CIT	7437	7781	G	A	0.502858		1.018	(0.978-1.06)	0.386997		1.062	(0.965-1.167)	0.214469	1.006	(0.958-1.055)	0.818786	0.335227
rs203343	12	120233601	CIT	7454	7793	A	G	0.183413		0.9873	(0.935-1.042)	0.626355		0.942	(0.831-1.068)	0.350845	1.001	(0.939-1.066)	0.975501	0.416666
rs11060333	12	122678607	MLXIP:LRRC43:IL31:B3GNT4:DIABLO:VPS33A	7453	7792	A	G	0.246277		0.9833	(0.938-1.031)	0.508294		1.055	(0.942-1.18)	0.354467	0.962	(0.908-1.019)	0.186507	0.180197
rs3850952	12	124090802	TMED2:DDX55:EIF2B1:GTF2H3	7443	7787	C	A	0.295043		1.017	(0.972-1.064)	0.450994		1.03	(0.928-1.143)	0.574021	1.013	(0.960-1.068)	0.632713	0.785996
rs10846535	12	124130388	TMED2:DDX55:EIF2B1:GTF2H3:TCTN2	7453	7795	A	G	0.431499		0.9896	(0.949-1.031)	0.627446		1.007	(0.914-1.108)	0.893538	0.985	(0.937-1.034)	0.534304	0.70055
rs1887894	13	21607600	LATS2	7454	7796	G	A	0.25		0.9921	(0.946-1.04)	0.741		0.995	(0.892-1.109)	0.928	0.991	(0.937-1.048)	0.755	0.953
rs9509492	13	21608971	LATS2	7454	7797	G	A	0.277785		0.9964	(0.952-1.042)	0.888361		1.009	(0.909-1.12)	0.864456	0.993	(0.940-1.047)	0.787774	0.792754
rs7328482	13	21877418		7454	7797	A	C	0.0406203		1.03	(0.929-1.142)	0.605608		0.996	(0.776-1.279)	0.980294	1.04	(0.921-1.173)	0.526573	0.776445
rs4119478	13	73254212	MIR548I4:MZT1:C13orf34	7451	7792	G	A	0.315653		0.9753	(0.932-1.02)	0.283843		0.943	(0.851-1.046)	0.267796	0.985	(0.935-1.038)	0.569691	0.481086
rs1408047	13	103484918	KDELC1:BIVM:ERCC5:LOC121952	7455	7797	A	G	0.311336		0.9663	(0.924-1.01)	0.136873		0.929	(0.838-1.028)	0.153613	0.978	(0.927-1.03)	0.396505	0.396144
rs12870278	13	103543243	BIVM:ERCC5:LOC121952	7455	7796	G	A	0.190315		0.9849	(0.934-1.038)	0.570574		0.863	(0.761-0.979)	0.0224832	1.023	(0.963-1.086)	0.461481	0.0214852
rs11164141	13	114259570	TFDP1:ATP4B	7452	7793	A	G	0.3755		0.9831	(0.943-1.025)	0.400308		0.996	(0.903-1.098)	0.935964	0.979	(0.932-1.029)	0.405451	0.772437
rs4150792	13	114288971	TFDP1:ATP4B:GRK1	7452	7790	G	A	0.376066		0.9782	(0.938-1.02)	0.291122		0.995	(0.902-1.096)	0.911835	0.973	(0.926-1.022)	0.279196	0.709677
rs3020445	14	64788644	ESR2:TEX21P	7455	7796	G	A	0.422235		1.009	(0.967-1.052)	0.708028		1.067	(0.969-1.173)	0.183506	0.992	(0.944-1.041)	0.739235	0.198551
rs12880109	14	68813032	RAD51L1	7453	7796	A	G	0.390124		0.9985	(0.957-1.041)	0.957518		1.192	(1.087-1.307)	0.000191775	0.946	(0.899-0.994)	0.0280011	3.31165e-05
rs17105760	14	68984500	RAD51L1	7455	7797	A	G	0.00222922		0.9558	(0.605-1.508)	0.876731		1.662	(0.743-3.714)	0.215663	0.755	(0.399-1.428)	0.388	0.155957
rs17106237	14	69203145		7455	7797	G	A	0.122804		0.9842	(0.925-1.047)	0.575269		1.087	(0.950-1.242)	0.224873	0.954	(0.885-1.027)	0.209917	0.10754
rs861537	14	104167075	KLC1:XRCC3:ZFYVE21:PPP1R13B	7415	7732	A	G	0.308378		0.9892	(0.945-1.035)	0.637809		1.065	(0.965-1.175)	0.205196	0.967	(0.917-1.019)	0.204914	0.0943231
rs4983559	14	105277209	AKT1:ZBTB42:MGC23270	7449	7785	A	G	0.394086		0.9744	(0.934-1.016)	0.24693		1.089	(0.989-1.199)	0.0824466	0.942	(0.895-0.990)	0.0187788	0.0125888
rs2896489	14	140148051	KLC1	7455	7795	G	A	0.30741		0.9923	(0.948-1.038)	0.740069		1.07	(0.969-1.18)	0.178268	0.961	(0.920-1.022)	0.247918	0.0912603
rs1565866	15	40455894	BUB1B	7455	7797	C	A	0.455252		1.03	(0.989-1.072)	0.187168		1.078	(0.980-1.184)	0.120101	1.016	(0.968-1.066)	0.516339	0.298921
rs7178873	15	40489387	BUB1B:PAK6	7455	7796	G	A	0.00190151		1.197	(0.755-1.896)	0.468473		2.418	(1.142-5.121)	0.0210457	0.852	(0.445-1.63)	0.628867	0.046153
rs7165509	15	40945900	CASC5:RAD51	7455	7796	A	G	0.431742		1.03	(0.987-1.073)	0.177593		1.002	(0.908-1.105)	0.975636	1.038	(0.988-1.091)	0.13422	0.5383
rs12592524	15	41003463	CASC5:RAD51:FAM82A2	7455	7795	A	G	0.417082		1.029	(0.987-1.073)	0.183815		0.992	(0.898-1.094)	0.864964	1.041	(0.990-1.094)	0.113126	0.409311
rs570933	15	43824030	TP53BP1:MAP1A:PPIP5K1	7454	7797	A	G	0.311816		0.962	(0.919-1.006)	0.0940995		1.009	(0.910-1.118)	0.862831	0.948	(0.898-1)	0.050735	0.313946
rs12902785	15	66928241		7455	7796	A	G	0.321585		1.016	(0.973-1.062)	0.417681		1.048	(0.949-1.157)	0.348448	1.007	(0.956-1.061)	0.787274	0.497437
rs2118612	15	67400490	SMAD3	7453	7790	A	G	0.21		0.9599	(0.913-1.009)	0.112		1.005	(0.894-1.129)	0.932	0.946	(0.890-1.005)	0.074	0.396
rs6494633	15	67423306	SMAD3	7455	7794	G	A	0.424815		0.981	(0.940-1.023)	0.397849		0.989	(0.898-1.089)	0.828117	0.979	(0.930-1.029)	0.393825	0.848692
rs4779041	15	83337059	LOC440300:CPEB1:AP3B2:LOC338963	7455	7795	G	A	0.353705		1.007	(0.964-1.051)	0.72895		0.983	(0.890-1.086)	0.741973	1.014	(0.964-1.067)	0.587796	0.605892
rs2268049	16	1371154	UBE2I:BAIAP3:C16orf42:GNPTG:UNKL	7453	7789	G	A	0.140238		1.027	(0.968-1.088)	0.404866		1.157	(1.011-1.325)	0.0337367	0.988	(0.920-1.061)	0.740372	0.0570203
rs7302	16	1375263	UBE2I:BAIAP3:C16orf42:GNPTG:UNKL	7431	7761	C	A	0.112263		0.9724	(0.912-1.037)	0.402102		1.041	(0.901-1.202)	0.584071	0.952	(0.881-1.028)	0.206329	0.304129
rs1061621	16	1376892	UBE2I	7445	7768	G	A	0.15		1.029	(0.973-1.089)	0.332		1.132	(0.990-1.293)	0.07	0.999	(0.932-1.07)	0.982	0.129
rs2745098	16	1536535	CCDC154:CLCN7:PTX4:TELO2:IFT140:TMEM204	7452	7795	G	A	0.37168		0.9963	(0.954-1.039)	0.913602		1.008	(0.913-1.113)	0.871316	0.993	(0.944-1.044)	0.775543	0.793666
rs8061528	16	3656482	NLRC3:SLX4:DNASE1	7455	7796	G	A	0.204839		1.01	(0.961-1.062)	0.675665		1.047	(0.930-1.177)	0.446469	0.991	(0.941-1.061)	0.993148	0.517137
rs7195624	16	9010213	CARHSP1:USP7	7449	7786	C	A	0.289367		1.002	(0.957-1.049)	0.968509		1.008	(0.907-1.12)	0.881928	1.001	(0.948-1.056)	0.981065	0.907264
rs9927946	16	9083367	USP7	7451	7792	A	G	0.435183		0.9942	(0.953-1.036)	0.88588		0.961	(0.871-1.058)	0.415608	1.005	(0.956-1.055)	0.855937	0.440684
rs3136042	16	14014055	ERCC4	7437	7784	G	A	0.019414		1.094	(0.944-1.268)	0.254389		1.036	(0.725-1.478)	0.847221	1.112	(0.935-1.321)	0.227727	0.736306
rs7135	16	19514483	MIR1972-2:TMC5:GDE1:CP110	7453	7794	A	G	0.266872		0.9611	(0.917-1.007)	0.108457		1.001	(0.901-1.111)	0.987054	0.949	(0.898-1.003)	0.0655134	0.397954
rs12447418	16	19539858	MIR1972-2:TMC5:GDE1:CP110:C16orf62	7455	7795	A	G	0.200098		0.9579	(0.91-1.008)	0.119266		1.018	(0.903-1.148)	0.76644	0.931	(0.883-1)	0.0502529	0.271729
rs9935995	16	19592730	MIR1972-2:CP110:C16orf62	7455	7795	G	A	0.217607		0.9643	(0.917-1.014)	0.175524		1.027	(0.914-1.154)	0.649445	0.946	(0.89-1.005)	0.0705146	0.242673
rs249941	16	23644738	MIR1972-2:NDUFAB1:PALB2:DCTN5:PLK1	7453	7797	G	A	0.190852		1.023	(0.970-1.077)	0.406204		1.021	(0.905-1.152)	0.733303	1.023	(0.962-1.087)	0.464054	0.978918
rs2023671	16	23849839	MIR1972-2:PRKCB	7455	7797	A	C	0.257999		1.002	(0.956-1.05)	0.865233		0.984	(0.882-1.097)	0.773086	1.007	(0.953-1.065)	0.793519	0.719888
rs1886701	16	68676932	MIR1972-2:CDH3	7455	7797	C	A	0.000524521		1.087	(0.396-2.979)	0.807094		NA	(NA-NA)	NA	NA	(NA-NA)	NA	NA
rs16947165	16	78159277	WWOX	7454	7795	A	G	0.306086		0.9691	(0.927-1.012)	0.206718		1.062	(0.961-1.172)	0.237227	0.942	(0.893-0.993)	0.0273275	0.0482861
rs12923828	16	78265497	WWOX	7455	7797	T	A	0.146833		0.9917	(0.936-1.051)	0.796678		0.986	(0.861-1.127)	0.834319	0.994	(0.927-1.064)	0.852205	0.923281
rs6564520	16	78306219	WWOX	7455	7795	G	A	0.41541		1.001	(0.960-1.043)	0.945931		1.028	(0.938-1.127)	0.552195	0.993	(0.945-1.042)	0.7659	0.522274
rs12051039	16	78488305	WWOX	7451	7793	A	C	0.055858		1.01	(0.925-1.102)	0.864336		1.038	(0.851-1.265)	0.713202	1.002	(0.903-1.11)	0.976789	0.76391
rs11643201	16	83312375	CDH13	7455	7796	G	A	0.104911		0.9931	(0.928-1.062)	0.82565		0.992	(0.851-1.156)	0.919515	0.993	(0.918-1.075)	0.868503	0.989343
rs6500437	16	89789898	ZNF276	7249	7500	A	G	0.28		1.021	(0.973-1.07)	0.367		0.954	(0.856-1.064)	0.399	1.041	(0.986-1.099)	0.147	0.173
rs7195066	16	89836323	C16orf7:ZNF276:FANCA	7451	7797	G	A	0.311221		1.012	(0.968-1.059)	0.551323		0.931	(0.837-1.035)	0.188028	1.037	(0.984-1.094)	0.171475	0.0885796
rs4785722	16	89863110	ZNF276	7449	7794	A	G	0.29		1.015	(0.97-1.062)	0.491		0.936	(0.841-1.041)	0.22	1.04	(0.986-1.096)	0.148	0.092
rs11076628	16	89875246	FANCA:SPIRE2	7455	7795	A	G	0.376787		1.026	(0.983-1.071)	0.215586		0.941	(0.850-1.041)	0.235056	1.053	(1.002-1.108)	0.0428072	0.0596532
rs17734	17	1801144	RPA1:RTN4RL1	7434	7771	A	G	0.4073		0.9997	(0.959-1.042)	0.972539		1.001	(0.908-1.104)	0.983062	0.999	(0.951-1.05)	0.976522	0.975554
rs17761467	17	1805677	RPA1:RTN4RL1	7455	7795	G	A	0.173311		0.989	(0.937-1.044)	0.75727		1.052	(0.933-1.187)	0.405655	0.97	(0.910-1.034)	0.352315	0.26298
rs2078486	17	7583083	SHBG:ATP1B2:TP53:WRAP53:EFNB3:DNAH2	7450	7795	G	A	0.0762217		1.001	(0.925-1.081)	0.995666		0.899	(0.741-1.088)	0.273922	1.032	(0.942-1.129)	0.494879	0.219904
rs2287498	17	7592560	TP53/WRAP53	7455	7797	G	A	0.08		1.004	(0.928-1.084)	0.937		0.921	(0.762-1.112)	0.392	1.029	(0.939-1.126)	0.538	0.32
rs8079273	17	7597478	ATP1B2:TP53:WRAP53:EFNB3:DNAH2	7454	7794	G	A	0.0154774		1.001	(0.848-1.182)	0.938668		1.351	(0.970-1.88)	0.074819	0.898	(0.731-1.103)	0.3039	0.0488646
rs2278637	17	8062102	ALOXE3:HES7:PER1:VAMP2:TMEM107:MIR3676:C17orf59:AURKB	7444	7791	A	C	0.348113		1.007	(0.963-1.052)	0.749438		1.018	(0.918-1.128)	0.730776	1.004	(0.953-1.057)	0.892422	0.812999
rs3027247	17	8071592	MIR3676:C17orf59:AURKB:C17orf44:C17orf68:PFAS	7453	7794	A	C	0.290615		1.049	(1.003-1.097)	0.0440443		1.108	(0.996-1.231)	0.0570546	1.032	(0.977-1.089)	0.25568	0.264318
rs3826392	17	11922904	DNAH9:ZNF18:MAP2K4	7454	7796	A	C	0.24118		0.9986	(0.951-1.048)	0.997827		1.084	(0.974-1.207)	0.13828	0.973	(0.919-1.031)	0.355057	0.0913739
rs4252596	17	37855834	STARD3:TCAP:PNMT:PGAP3:ERBB2:C17orf37:GRB7	7455	7796	C	A	0.130811		0.9961	(0.935-1.061)	0.902627		1.04	(0.904-1.196)	0.579403	0.983	(0.912-1.058)	0.647238	0.496225
rs9911630	17	41188342	APAF1:ANKS1B	7455	7796	A	G	0.33		0.935	(0.892-0.98)	0.004		0.956	(0.868-1.052)	0.359	0.929	(0.879-0.981)	0.008	0.612
rs7217885	17	48405172	MIR4315-1:TMEM92:XYLT2:MRPL27:EME1	7455	7797	A	G	0.000262261		1.158	(0.416-3.221)	0.694776		NA	(NA-NA)	NA	NA	(NA-NA)	NA	NA
rs4794136	17	48433958	MIR4315-1:XYLT2:MRPL27:EME1:LRRC59	7452	7792	A	G	0.479172		0.9657	(0.926-1.007)	0.119317		0.932	(0.848-1.024)	0.140909	0.977	(0.929-1.025)	0.340592	0.404131
rs12952884	17	49226051	MIR4315-1:SPAG9:NME1-NME2:NME1:NME2:MBTD1	7437	7777	G	A	0.386092		1.026	(0.982-1.071)	0.266765		1.057	(0.955-1.168)	0.283131	1.017	(0.966-1.07)	0.521159	0.522528
rs17817865	17	53032425	MIR4315-1:TOM1L1:COX11:STXBP4	7455	7797	G	A	0.269047		1.009	(0.962-1.057)	0.748669		1.028	(0.922-1.144)	0.619906	1.003	(0.949-1.061)	0.902426	0.712088
rs8066463	17	61818390	MIR4315-1:MAP3K3:LIMD2:STRADA:CCDC47:DDX42	7452	7795	A	G	0.324031		1.02	(0.975-1.067)	0.365954		1.04	(0.941-1.149)	0.441107	1.015	(0.962-1.07)	0.593637	0.679579
rs2070776	17	62007498	MIR4315-1:GH2:CSH1:CSHL1:GH1:CD79B:SCN4A	7455	7793	G	A	0.337159		1.01	(0.966-1.056)	0.662242		1.057	(0.957-1.168)	0.270344	0.996	(0.944-1.051)	0.88723	0.320011
rs2239680	17	76219783	TK1:AFMID:BIRC5:EPR1:LOC283999	7454	7794	A	G	0.268757		0.9977	(0.952-1.045)	0.865367		0.925	(0.828-1.034)	0.170334	1.02	(0.965-1.077)	0.47753	0.14027
rs12966424	18	12678486	SPIRE1:PSMG2:CEP76	7450	7786	A	G	0.446541		0.9788	(0.938-1.021)	0.3235		1.048	(0.952-1.154)	0.333696	0.959	(0.912-1.007)	0.0933869	0.117151
rs13381022	18	18532756	ROCK1	7454	7794	A	G	0.00901758		0.8569	(0.673-1.09)	0.181806		0.653	(0.350-1.216)	0.17923	0.911	(0.699-1.209)	0.548173	0.34472
rs11082221	18	20531677	RBBP8	7455	7797	A	G	0.03		0.924	(0.825-1.034)	0.198		0.953	(0.729-1.245)	0.725	0.916	(0.800-1.047)	0.197	0.803
rs7234479	18	20599564	RBBP8	7455	7796	A	C	0.121795		0.9777	(0.917-1.042)	0.491217		0.962	(0.832-1.112)	0.597818	0.983	(0.913-1.057)	0.638811	0.802711
rs9304261	18	20606596	RBBP8	7418	7767	G	A	0.202667		1.007	(0.957-1.059)	0.798163		1.019	(0.909-1.143)	0.742203	1.003	(0.945-1.064)	0.91746	0.813854
rs6567131	18	57579140	intergenic	7453	7793	C	G	0.45		1.011	(0.969-1.055)	0.591		1.003	(0.912-1.102)	0.956	1.014	(0.964-1.066)	0.584	0.843
rs9319956	18	57594068	PMAIP1	7453	7795	A	C	0.469701		1.023	(0.980-1.067)	0.28759		1.011	(0.920-1.11)	0.819807	1.027	(0.976-1.079)	0.301171	0.783841
rs3764640	19	1207238	SBNO2:STK11:C19orf26:ATP5D:MIDN	7444	7787	C	A	0.226348		0.9451	(0.899-0.993)	0.02707		0.93	(0.831-1.041)	0.209193	0.941	(0.896-1.007)	0.0818893	0.755765
rs16963425	19	30340724	CCNE1	7450	7790	G	A	0.27372		1.057	(1.009-1.107)	0.0175511		0.996	(0.895-1.108)	0.943476	1.075	(1.019-1.135)	0.00864855	0.227089
rs751731	19	33463058	CCDC123:C19orf40:RHPN2	7452	7795	G	A	0.29596		1.032	(0.987-1.079)	0.183518		0.954	(0.86-1.059)	0.375373	1.056	(1.003-1.113)	0.0385407	0.0979873
rs7247515	19	40755915	MAP3K10:TTC9B:CNTD2:AKT2:MIR641	7454	7796	G	A	0.0818689		0.972	(0.901-1.048)	0.461289		1.047	(0.885-1.238)	0.593507	0.95	(0.868-1.04)	0.26451	0.341792
rs2298881	19	45926916	PPP1R13L:CD3EAP:ERCC1:FOSB	7443	7792	C	A	0.109813		0.9502	(0.889-1.016)	0.134318		0.822	(0.701-0.964)	0.0164418	0.981	(0.916-1.068)	0.790509	0.0484012
rs17294094	19	48720926	SNAR-A9:LIG1:CARD8	7453	7796	A	G	0.448915		0.9818	(0.941-1.023)	0.361924		0.975	(0.886-1.073)	0.603332	0.984	(0.936-1.033)	0.513909	0.875267
rs1805419	19	49459104	SNAR-A9:NUCB1:DHDH:BAX:FTL:GYS1:RUVBL2	7429	7772	G	A	0.266726		0.9861	(0.940-1.034)	0.54145		1.006	(0.904-1.118)	0.916811	0.98	(0.927-1.036)	0.482725	0.686865
rs3817074	19	49459212	SNAR-A9:NUCB1:DHDH:BAX:FTL:GYS1:RUVBL2	7454	7796	G	A	0.114328		0.9573	(0.897-1.021)	0.205399		1.016	(0.880-1.172)	0.830959	0.931	(0.870-1.015)	0.113846	0.370824
rs4813643	20	3787755	C20orf27:SPEF1:CENPB:CDC25B:C20orf29:MAVS	7452	7788	A	G	0.410039		1.028	(0.985-1.072)	0.210414		1.017	(0.925-1.117)	0.730231	1.031	(0.981-1.083)	0.22315	0.804265
rs2422978	20	4763108	PRNT:RASSF2	7453	7795	A	G	0.268789		0.991	(0.945-1.039)	0.702102		0.995	(0.891-1.109)	0.921395	0.99	(0.937-1.046)	0.718951	0.943831
rs6086987	20	9685155	PAK7	7371	7700	A	G	0.0973724		1.01	(0.940-1.084)	0.780105		0.9937	(0.838-1.178)	0.942205	1.015	(0.933-1.103)	0.73597	0.838231
rs6133777	20	9995950	ANKRD5	7455	7796	C	A	0.452626		1.025	(0.984-1.067)	0.228369		1.037	(0.944-1.139)	0.445217	1.021	(0.973-1.071)	0.390463	0.782251
rs6060446	20	30231637	ID1:MIR3193:COX4I2:BCL2L1	7455	7797	A	G	0.202826		0.9955	(0.945-1.048)	0.880933		1.015	(0.902-1.142)	0.798731	0.981	(0.930-1.052)	0.735412	0.714933
rs910671	20	43601921	PABPC1L:TOMM34:STK4	7454	7797	C	A	0.496426		1.023	(0.981-1.066)	0.253472		0.99	(0.898-1.09)	0.830321	1.034	(0.983-1.086)	0.188794	0.452333
rs2267860	20	43655135	STK4	7454	7796	A	G	0.493934		1.017	(0.976-1.06)	0.379957		0.981	(0.891-1.08)	0.699781	1.029	(0.979-1.08)	0.261084	0.414065
rs85021	20	45179495	ZNF334:C20orf123:SLC13A3	7455	7795	A	G	0.341803		1.014	(0.970-1.06)	0.545131		1.049	(0.951-1.157)	0.338738	1.004	(0.953-1.057)	0.876352	0.454502
rs16979815	20	54941087	C20orf108:AURKA:CSTF1:CASS4	7452	7797	G	A	0.164962		0.9671	(0.915-1.022)	0.223074		0.929	(0.815-1.058)	0.268969	0.979	(0.916-1.045)	0.516937	0.505726
rs4239838	21	46202309	UBE2G2:SUMO3	7455	7797	A	G	0.43532		0.9928	(0.953-1.034)	0.748023		0.94	(0.854-1.033)	0.199368	1.009	(0.961-1.059)	0.711886	0.208761
rs2838690	21	46222486	UBE2G2:SUMO3:PTTG1IP	7455	7795	G	A	0.166393		0.9695	(0.919-1.022)	0.266184		0.995	(0.885-1.119)	0.934574	0.962	(0.903-1.024)	0.219904	0.627987
rs2838693	21	46227872	UBE2G2:SUMO3:PTTG1IP	7452	7795	C	A	0.103889		1.061	(0.993-1.134)	0.0869329		1.124	(0.968-1.304)	0.125122	1.043	(0.963-1.129)	0.296028	0.408727
rs235314	21	46271452	UBE2G2:SUMO3:PTTG1IP:ITGB2	7451	7787	A	G	0.45859		1.028	(0.986-1.07)	0.19137		1.042	(0.948-1.144)	0.388032	1.024	(0.975-1.074)	0.343157	0.750394
rs181390	22	18222263	BCL2L13:BID:MIR3198:MICAL3	7452	7789	G	A	0.337675		0.9919	(0.949-1.036)	0.681582		0.974	(0.881-1.077)	0.611981	0.997	(0.947-1.049)	0.914157	0.696537
rs9605031	22	19921378	TXNRD2:COMT:ARVCF	7454	7797	G	A	0.298538		0.9843	(0.940-1.03)	0.475216		1.044	(0.944-1.154)	0.399577	0.967	(0.916-1.02)	0.216112	0.204211
rs740603	22	19945177	COMT	7434	7765	G	A	0.45		0.982	(0.942-1.023)	0.437		0.947	(0.861-1.04)	0.254	0.993	(0.946-1.042)	0.774	0.399
rs9332362	22	19949103	TXNRD2:COMT:ARVCF	7450	7782	G	A	0.0292148		0.9977	(0.886-1.123)	0.952518		1.05	(0.7924-1.392)	0.733193	0.982	(0.851-1.133)	0.804234	0.693708
rs738200	22	28792887	TTC28	7455	7797	G	A	0.0858248		0.9654	(0.897-1.038)	0.322685		0.995	(0.839-1.18)	0.957335	0.956	(0.876-1.043)	0.315143	0.698249
rs5762814	22	29203964	CCDC117:XBP1	7454	7797	G	A	0.139138		0.9954	(0.936-1.058)	0.853279		1.008	(0.880-1.154)	0.909502	0.992	(0.922-1.066)	0.818888	0.840954
rs738207	22	35829452	HMOX1:MCM5	7451	7793	G	A	0.214347		1.001	(0.951-1.054)	0.986403		0.934	(0.824-1.058)	0.282505	1.022	(0.963-1.084)	0.471739	0.222838
rs9607761	22	41371418	XPNPEP3:RBX1	7455	7794	A	T	0.000196734		1.4	(0.933-2.1)	0.435607		NA	(NA-NA)	NA	NA	(NA-NA)	NA	NA
rs4822011	22	41550954	EP300	7455	7797	A	G	0.3849		0.9783	(0.937-1.02)	0.332674		0.99	(0.898-1.091)	0.840837	0.975	(0.927-1.025)	0.313946	0.788619
rs104664	22	45711854	UPK3A:FAM118A:SMC1B	7454	7797	A	G	0.128647		0.9911	(0.931-1.055)	0.796363		1.03	(0.891-1.19)	0.689525	0.979	(0.909-1.055)	0.582382	0.563196
BRCA2 carriers										Overall risk				Tumour subtype specific risk
SNP	Chromos	Position	Nearby genes	Nctrl	Ncase	allele1	allele2	MAF		HR	95% CI	p-value		HR_ERpos	95% CI ERpos	p_ERpos	HR_ERneg	95% CI ERneg	p_ERneg	p_dif
rs2020902	1	5066511	CELA2B:CASP9:DNAJC16:AGMAT	3878	4327	A	G	0.153138		1.015	(0.936-1.101)	0.628785		0.987	(0.899-1.083)	0.778534	1.115	(0.948-1.311)	0.18638	0.194924
rs2233025	1	11735652		3879	4326	G	A	0.176661		1.087	(1.009-1.172)	0.0264587		1.064	(0.975-1.161)	0.161086	1.166	(0.989-1.375)	0.0661926	0.34499
rs2336030	1	11736600	KCNK9:TRAPPC9	3879	4327	G	A	0.334329		1.004	(0.943-1.069)	0.9535		1.046	(0.973-1.124)	0.217619	0.869	(0.757-0.9967)	0.0447244	0.0203455
rs4646091	1	15822043	FANCL	3879	4330	A	G	0.238153		1.044	(0.975-1.117)	0.199825		1.015	(0.937-1.099)	0.71088	1.145	(0.987-1.327)	0.0730108	0.172971
rs1052576	1	15832543	CASP9	3868	4311	G	A	0.47		0.998	(0.94-1.059)	0.859		1.004	(0.937-1.075)	0.908	0.976	(0.857-1.11)	0.712	0.708
rs4645989	1	15850343	BAG3	3877	4318	A	G	0.292739		0.9639	(0.902-1.029)	0.296269		0.979	(0.908-1.055)	0.573295	0.914	(0.788-1.06)	0.234063	0.427062
rs885814	1	21875916	RAB5A:C3orf48:KAT2B	3881	4329	G	A	0.313581		0.9606	(0.901-1.023)	0.197656		0.936	(0.869-1.007)	0.0767695	1.05	(0.910-1.211)	0.501434	0.171361
rs1767429	1	21889340	SCRIB:MIR937:PUF60:NRBP2:EPPK1	3880	4330	A	G	0.409501		0.9558	(0.900-1.014)	0.130309		0.937	(0.873-1.004)	0.0641774	1.023	(0.893-1.172)	0.739917	0.267991
rs12025623	1	21892479	HABP2:NRAP	3876	4322	G	A	0.354538		0.9539	(0.897-1.014)	0.122565		0.93	(0.865-0.9984)	0.0451507	1.04	(0.903-1.196)	0.586085	0.177432
rs2028706	1	23849839	CDKN1A	3881	4330	A	C	0.228474		1.032	(0.963-1.106)	0.401516		1.021	(0.941-1.108)	0.616021	1.071	(0.913-1.256)	0.400375	0.618133
rs2805053	1	26446006	RIPK2	3856	4300	A	G	0.492092		1.044	(0.985-1.107)	0.160581		1.04	(0.971-1.115)	0.261084	1.059	(0.924-1.213)	0.408693	0.826634
rs686083	1	38149193		3880	4329	G	A	0.26276		0.9686	(0.904-1.037)	0.370137		0.973	(0.900-1.051)	0.489103	0.953	(0.820-1.107)	0.528539	0.810654
rs513826	1	38166022	ZNF572:SQLE:KIAA0196	3881	4330	A	G	0.446779		0.9347	(0.880-0.992)	0.0277504		0.923	(0.863-0.9877)	0.0202873	0.977	(0.859-1.111)	0.725483	0.449228
rs13374264	1	46683014		3881	4330	G	A	0.000548045			(-)	0.387708		NA	(NA-NA)	NA	NA	(NA-NA)	NA	NA
rs9793263	1	46722389	XRCC5	3877	4323	G	A	0.407256		0.9624	(0.907-1.021)	0.245272		0.961	(0.897-1.029)	0.250413	0.968	(0.850-1.102)	0.622048	0.920416
rs12058802	1	91923254	C10orf93	3881	4328	G	A	0.480996		1.041	(0.981-1.104)	0.19754		1.033	(0.965-1.106)	0.34689	1.07	(0.933-1.221)	0.338818	0.679048
rs522712	1	91943207	EIF5B:REV1	3881	4330	A	C	0.381744		0.9521	(0.897-1.01)	0.123673		0.945	(0.880-1.013)	0.109807	0.977	(0.851-1.12)	0.7343	0.68127
rs13447450	1	91965850	CDC42BPA	3881	4329	G	A	0.383374		0.9483	(0.892-1.007)	0.0942758		0.935	(0.871-1.003)	0.0601951	0.996	(0.866-1.145)	0.957135	0.440646
rs13447454	1	91966406	STK38L	3880	4330	G	A	0.131912		1.001	(0.918-1.092)	0.963236		1.014	(0.919-1.119)	0.778753	0.957	(0.790-1.157)	0.647395	0.594416
rs12125947	1	91990487	NLRC3:SLX4:DNASE1	3881	4329	A	G	0.482095		0.9287	(0.875-0.984)	0.0161254		0.907	(0.846-0.9714)	0.00536234	1.01	(0.878-1.16)	0.89074	0.191375
rs6674384	1	114455907	MYC	3881	4328	G	A	0.27482		0.9431	(0.884-1.006)	0.0765995		0.893	(0.827-0.963)	0.00363641	1.128	(0.980-1.297)	0.0912036	0.00516712
rs11811771	1	114463049	C20orf108:AURKA:CSTF1:CASS4	3881	4329	A	G	0.429781		1.032	(0.973-1.094)	0.282036		1.056	(0.985-1.131)	0.120485	0.954	(0.831-1.096)	0.508671	0.217468
rs11102707	1	114493583	CALY:PRAP1:C10orf125:ECHS1:MIR3944:PAOX:MTG1:SPRN	3877	4327	G	A	0.225256		0.936	(0.873-1.003)	0.0643187		0.897	(0.826-0.972)	0.00844306	1.078	(0.925-1.255)	0.336035	0.0425297
rs2911571	1	140148051		3880	4329	G	A	0.136314			(-)	0.630741		1.029	(0.931-1.137)	0.575784	0.993	(0.810-1.218)	0.94748	0.76939
rs471144	1	152454255	GVINP1:OR2AG2:OR2AG1:OR6A2	3879	4330	A	C	0.0723596		1	(0.895-1.117)	0.950898		0.912	(0.793-1.048)	0.193997	1.313	(1.05-1.642)	0.0170133	0.0103363
rs6673329	1	162794500	RNASET2	3874	4324	G	A	0.0209807		0.6345	(0.131-3.051)	0.34212		1.109	(0.874-1.408)	0.392462	1.099	(0.700-1.724)	0.681091	0.971819
rs697004	1	211842808	CCDC154:CLCN7:PTX4:TELO2:IFT140:TMEM204	3881	4329	C	A	0.330877		0.9656	(0.908-1.026)	0.229412		0.966	(0.899-1.038)	0.343534	0.963	(0.838-1.105)	0.586528	0.963484
rs1136410	1	226555302	PARP1	3880	4330	A	G	0.16		0.994	(0.919-1.074)	0.927		0.995	(0.908-1.09)	0.909	0.99	(0.825-1.187)	0.913	0.964
rs11806633	1	227308416	MIR3676:C17orf59:AURKB:C17orf44:C17orf68:PFAS	3880	4329	A	G	0.0690705		0.9854	(0.880-1.103)	0.851346		0.971	(0.851-1.106)	0.653834	1.037	(0.808-1.331)	0.775087	0.651192
rs6676779	1	243875486	ANKZF1:GLB1L:STK16:TUBA4A:TUBA4B:DNAJB2:PTPRN:MIR153-1:RESP18	3880	4329	A	G	0.130649		1.005	(0.919-1.098)	0.881829		1.031	(0.931-1.142)	0.553887	0.912	(0.739-1.126)	0.39324	0.319669
rs2063018	2	21815166	BRE	3868	4314	A	G	0.3		1.012	(0.948-1.08)	0.726		1.037	(0.964-1.116)	0.33	0.927	(0.802-1.071)	0.305	0.178
rs6721310	2	28319320	FAM53A:SLBP:TMEM129:TACC3	3881	4330	G	A	0.339971		1.026	(0.963-1.093)	0.432415		1.058	(0.986-1.135)	0.114717	0.92	(0.805-1.052)	0.222838	0.0677792
rs1421	2	47613870	CARHSP1:USP7	3881	4330	A	G	0.12599		1.052	(0.959-1.152)	0.261513		1.05	(0.946-1.165)	0.352984	1.057	(0.871-1.281)	0.5739	0.956334
rs10495944	2	47703290	RGPD8:BUB1	3881	4329	G	A	0.125152		1.048	(0.956-1.148)	0.27753		1.045	(0.941-1.16)	0.410829	1.059	(0.872-1.285)	0.563372	0.906148
rs11903456	2	58393836	MIR4315-1:TOM1L1:COX11:STXBP4	3875	4318	G	A	0.219883		1.079	(1.005-1.158)	0.0331223		1.099	(1.013-1.193)	0.0235972	1.007	(0.857-1.184)	0.927659	0.358084
rs768298	2	58410972	GBF1:NFKB2:PSD:FBXL15:CUEDC2:MIR146B:C10orf95	3881	4330	G	A	0.304652		1.053	(0.987-1.123)	0.0862111		1.061	(0.985-1.143)	0.11805	1.027	(0.889-1.185)	0.721458	0.695024
rs10490250	2	58509628	WWOX	3881	4330	A	C	0.203325		1.045	(0.972-1.123)	0.229202		1.039	(0.955-1.129)	0.369306	1.066	(0.907-1.253)	0.435693	0.786293
rs2305354	2	100019496	TP53BP1:MAP1A:PPIP5K1	3879	4330	G	A	0.452552		0.9684	(0.912-1.027)	0.272184		0.989	(0.923-1.056)	0.720097	0.905	(0.794-1.03)	0.130967	0.245803
rs4075604	2	173387668	Intergenic	3881	4330	G	A	0.21		1.031	(0.959-1.108)	0.449		1.011	(0.929-1.098)	0.804	1.105	(0.949-1.288)	0.197	0.314
rs12052479	2	173404804	C3orf19:C3orf20	3872	4316	C	A	0.212445		1.034	(0.961-1.111)	0.413181		1.012	(0.931-1.1)	0.775516	1.11	(0.952-1.293)	0.180197	0.301398
rs17702263	2	173459590	TRPM8	3880	4326	A	G	0.146722		1.025	(0.944-1.113)	0.606501		1.017	(0.925-1.119)	0.722933	1.053	(0.883-1.255)	0.561856	0.737541
rs12464787	2	179440029	ADCK5:CPSF1:MIR939:MIR1234:SLC39A4:VPS28:TONSL:CYHR1:KIFC2:FOXH1	3881	4330	G	A	0.282426		1.015	(0.952-1.083)	0.636168		0.998	(0.926-1.074)	0.946576	1.079	(0.934-1.246)	0.299145	0.352622
rs11674814	2	202153846	ALS2CR12	3880	4328	G	A	0.42		0.966	(0.909-1.026)	0.267		0.979	(0.913-1.049)	0.551	0.923	(0.804-1.058)	0.248	0.459
rs6757091	2	215672793	BARD1	3880	4327	G	C	0.39		0.996	(0.939-1.056)	0.9301		0.992	(0.926-1.063)	0.827	1.009	(0.8826-1.153)	0.9	0.839
rs6715570	2	215673440	SYT8:TNNI2:LSP1:MIR4298	3879	4329	G	A	0.292215		1.029	(0.964-1.099)	0.344288		1.035	(0.960-1.116)	0.365941	1.009	(0.8732-1.167)	0.899688	0.766813
rs12477063	2	215673664	CASP3:CCDC111:MLF1IP	3880	4329	A	G	0.393227		0.9989	(0.942-1.059)	0.991736		0.998	(0.931-1.069)	0.947814	1.003	(0.8777-1.147)	0.96253	0.944961
rs13001462	2	215678346	SLCO2A1	3875	4328	G	A	0.242838		1.029	(0.961-1.102)	0.387614		1.04	(0.961-1.124)	0.331764	0.992	(0.8526-1.154)	0.917728	0.599467
rs10205923	2	227614557	CDH13	3881	4330	G	A	0.0744124		0.938	(0.838-1.05)	0.252752		0.933	(0.816-1.065)	0.3039	0.957	(0.7422-1.233)	0.731872	0.867722
rs16822647	2	227651123	AKT3	3881	4330	A	G	0.0773962		0.9108	(0.815-1.017)	0.112234		0.903	(0.792-1.03)	0.128131	0.935	(0.725-1.205)	0.601793	0.822942
rs726379	2	231685198	SHFM1	3881	4328	A	G	0.25539		0.9316	(0.870-0.996)	0.0421766		0.932	(0.861-1.009)	0.0801923	0.932	(0.8025-1.083)	0.360371	0.996123
rs4663992	2	234889177	MIR4315-1:MAP3K3:LIMD2:STRADA:CCDC47:DDX42	3879	4330	C	A	0.344074		0.9972	(0.937-1.061)	0.935001		0.986	(0.918-1.058)	0.693147	1.038	(0.9031-1.192)	0.60146	0.531407
rs7609252	2	111419426	ITGA6:PDK1	3881	4330	A	G	0.0266715		0.9341	(0.777-1.122)	0.508177		0.948	(0.768-1.17)	0.621475	0.886	(0.586-1.34)	0.566072	0.778753
rs3769823	2	202122995	MIR1972-2:TMC5:GDE1:CP110:C16orf62	3881	4330	G	A	0.32219		1.038	(0.973-1.106)	0.247078		1.021	(0.948-1.099)	0.580083	1.097	(0.9583-1.257)	0.178748	0.365912
rs6735656	2	202124502	SYT8:TNNI2:LSP1:MIR4298:TNNT3	3881	4329	A	C	0.290378		1.04	(0.974-1.111)	0.230425		1.024	(0.949-1.105)	0.542895	1.098	(0.9529-1.264)	0.196795	0.405078
rs11688692	2	202189451		3881	4329	A	G	0.423082		0.9653	(0.908-1.025)	0.256731		0.979	(0.913-1.049)	0.54448	0.921	(0.8035-1.055)	0.233568	0.443659
rs668844	2	217021602	FAM53A:SLBP:TMEM129:TACC3	3692	4126	C	A	0.468086		1.034	(0.972-1.098)	0.284454		1.076	(1.003-1.153)	0.0404956	0.901	(0.788-1.031)	0.129959	0.0250996
rs13066757	3	10045030	RAD51L1	3833	4245	C	A	0.172506		0.9761	(0.903-1.055)	0.515327		1.001	(0.917-1.093)	0.973869	0.891	(0.7492-1.059)	0.190726	0.243191
rs7626117	3	10140671	RUNDC1:RPL27:IFI35:VAT1:RND2:BRCA1	3881	4327	G	A	0.182809		0.9708	(0.898-1.049)	0.437154		0.998	(0.914-1.09)	0.96924	0.878	(0.7399-1.042)	0.136587	0.197334
rs4103004	3	20042834	CCNE1	3880	4329	G	A	0.399013		0.9801	(0.923-1.041)	0.521228		0.982	(0.916-1.052)	0.607249	0.973	(0.856-1.106)	0.679313	0.906115
rs7653368	3	47985361	IL6ST	3879	4325	G	A	0.317406		1.018	(0.956-1.083)	0.551354		1.009	(0.938-1.085)	0.808643	1.049	(0.913-1.205)	0.495111	0.631821
rs13099560	3	48204768	MIR4315-1:MRC2:MARCH10:MIR548W	3824	4271	A	G	0.357505		0.994	(0.934-1.057)	0.917281		0.972	(0.905-1.043)	0.429306	1.073	(0.946-1.217)	0.26995	0.181414
rs13073141	3	51410485	YME1L1:MASTL:ACBD5	3881	4330	A	G	0.153087		0.9687	(0.893-1.05)	0.398154		0.947	(0.862-1.04)	0.259018	1.043	(0.876-1.24)	0.636235	0.350209
rs6807775	3	65133697	SHBG:ATP1B2:TP53:WRAP53:EFNB3:DNAH2	3880	4330	G	A	0.346407		1.02	(0.959-1.084)	0.545179		0.998	(0.930-1.071)	0.959868	1.096	(0.958-1.254)	0.181414	0.235888
rs16838754	3	131843104	DDB2:ACP2:NR1H3:MADD	3881	4330	A	G	0.13421		1.056	(0.970-1.148)	0.210978		1.056	(0.957-1.165)	0.272325	1.053	(0.871-1.273)	0.589836	0.980289
rs4241370	3	133794199	DNAH9:ZNF18:MAP2K4	3881	4330	A	C	0.463525		0.9934	(0.936-1.053)	0.821964		1.013	(0.946-1.084)	0.71432	0.929	(0.816-1.058)	0.266824	0.260518
rs4552343	3	133842112	DNHD1:RRP8:ILK:TAF10:TPP1:DCHS1	3881	4330	A	G	0.0670442		0.9713	(0.866-1.089)	0.629838		0.927	(0.808-1.063)	0.277356	1.126	(0.887-1.429)	0.327691	0.176601
rs7639683	3	133973731	HMOX1:MCM5	3872	4322	A	G	0.450146		0.9841	(0.9281-1.043)	0.605253		0.984	(0.918-1.054)	0.653915	0.982	(0.860-1.122)	0.793092	0.979436
rs13082648	3	142129008	KAT5:RNASEH2C	3881	4330	G	A	0.424492		1.014	(0.9567-1.075)	0.652531		1.054	(0.984-1.128)	0.133012	0.887	(0.777-1.012)	0.0749107	0.028115
rs803335	3	10085035	CTDSP1:VIL1:USP37	3814	4236	A	C	0.0827329		1.027	(0.9263-1.139)	0.587539		1.072	(0.951-1.208)	0.255864	0.877	(0.678-1.134)	0.31765	0.18044
rs13323290	3	15467029	METTL6:EAF1:COLQ	3867	4317	G	A	0.06		1.113	(0.9792-1.265)	0.09		1.126	(0.971-1.305)	0.114	1.063	(0.799-1.414)	0.674	0.731
rs2788865	4	1536535	TBCA	3881	4329	A	G	0.392814		0.9861	(0.9298-1.046)	0.657202		0.992	(0.925-1.063)	0.817401	0.966	(0.848-1.099)	0.599335	0.73034
rs798755	4	1720824	OCEL1:NR2F6:USHBP1:C19orf62:ANKLE1:ABHD8:MRPL34:DDA1:ANO8	3873	4317	G	A	0.207204		1.003	(0.9329-1.078)	0.90633		1.055	(0.971-1.147)	0.20365	0.83	(0.698-0.986)	0.0345354	0.0168493
rs1389999	4	14858341	ZRANB1:CTBP2	3879	4329	A	G	0.343689		0.9634	(0.9043-1.026)	0.28104		0.947	(0.880-1.019)	0.144724	1.023	(0.895-1.168)	0.7406	0.330127
rs9998559	4	15113921	TMEM65	3881	4329	G	C	0.402923		0.986	(0.9287-1.047)	0.630214		0.991	(0.924-1.062)	0.796114	0.969	(0.846-1.11)	0.650159	0.781599
rs2854915	4	46227872	CDC7	3789	4239	A	G	0.457524		0.9718	(0.9156-1.032)	0.33454		0.961	(0.897-1.03)	0.261084	1.009	(0.885-1.15)	0.896202	0.530936
rs1354360	4	70616322	NPAT:ATM	3877	4326	A	G	0.348897		0.9864	(0.9279-1.049)	0.721413		0.983	(0.913-1.058)	0.645204	0.998	(0.862-1.154)	0.97404	0.864941
rs1503721	4	70679571	SMAD3	3881	4330	A	G	0.311594		0.9856	(0.9255-1.05)	0.729832		0.979	(0.908-1.056)	0.586528	1.007	(0.869-1.167)	0.923885	0.751111
rs11099601	4	84382763	FAM175A	3881	4330	G	A	0.48		1.006	(0.9466-1.07)	0.781		1.002	(0.934-1.075)	0.947	1.02	(0.893-1.166)	0.767	0.819
rs17355027	4	84388915	KDELC1:BIVM:ERCC5:LOC121952	3879	4329	G	A	0.0986842		1.01	(0.913-1.118)	0.787977		0.984	(0.876-1.105)	0.782584	1.103	(0.894-1.36)	0.359054	0.352371
rs971539	4	84433804	KLC1	3878	4328	G	A	0.480441		0.9892	(0.930-1.052)	0.75003		0.991	(0.924-1.062)	0.79984	0.983	(0.860-1.123)	0.800787	0.915867
rs980455	4	103418957	IGFBP1:IGFBP3	3881	4330	A	G	0.380648		1.022	(0.963-1.083)	0.522298		1.017	(0.949-1.089)	0.631301	1.039	(0.911-1.183)	0.567609	0.783058
rs3774937	4	103434253	NSMCE2	3881	4330	A	G	0.326331		1.03	(0.969-1.094)	0.379375		1.019	(0.949-1.093)	0.597489	1.066	(0.930-1.221)	0.354439	0.573356
rs230530	4	103453980	MTAP	3881	4328	A	G	0.455171		0.9834	(0.928-1.042)	0.648996		0.985	(0.921-1.053)	0.654398	0.978	(0.861-1.111)	0.73597	0.928001
rs223497	4	103653976	JRK:PSCA:LY6K	3880	4329	A	G	0.487087		1.021	(0.963-1.082)	0.484989		1.03	(0.963-1.101)	0.381799	0.99	(0.871-1.124)	0.876276	0.593637
rs150895	4	103712589	SLC6A1	3881	4329	G	A	0.478685		0.9878	(0.931-1.047)	0.689194		0.997	(0.931-1.066)	0.92734	0.957	(0.840-1.09)	0.509108	0.596243
rs11946020	4	103944742	RAD50:IL13	3880	4330	A	G	0.34123		1.009	(0.949-1.072)	0.780886		1.01	(0.941-1.083)	0.788389	1.006	(0.877-1.154)	0.931893	0.963571
rs6830624	4	104020422	BARD1	3881	4330	A	G	0.285653		1.002	(0.939-1.069)	0.969485		1.032	(0.959-1.111)	0.399344	0.903	(0.781-1.044)	0.168078	0.114063
rs7439493	4	110656730	CASC5:RAD51:FAM82A2	3879	4329	G	A	0.434637		0.9943	(0.937-1.055)	0.800811		0.969	(0.904-1.038)	0.372653	1.086	(0.951-1.24)	0.221906	0.145387
rs4647610	4	185567931	RAI14	3881	4330	G	A	0.130252		1.014	(0.933-1.102)	0.776378		1.008	(0.913-1.113)	0.867745	1.034	(0.855-1.25)	0.726768	0.822733
rs4647601	4	185570032	NEK2	3870	4318	C	A	0.469773		0.9744	(0.920-1.032)	0.409818		0.974	(0.911-1.041)	0.443	0.975	(0.860-1.104)	0.688238	0.994973
rs13176284	5	34754248	PLCL2	3880	4329	G	A	0.254781		0.9607	(0.899-1.026)	0.229453		0.96	(0.888-1.038)	0.305277	0.962	(0.826-1.119)	0.611153	0.988142
rs2362974	5	36156654	MIR4315-1:TOM1L1:COX11:STXBP4	3881	4329	A	G	0.126188		1.047	(0.959-1.143)	0.30604		1.042	(0.942-1.153)	0.423747	1.066	(0.873-1.301)	0.529631	0.845483
rs7702272	5	36160854	BRE	3871	4321	G	A	0.0571289		0.9502	(0.837-1.078)	0.443053		0.943	(0.810-1.096)	0.444749	0.975	(0.735-1.293)	0.862105	0.843251
rs3797306	5	43127925	ATP1B2:TP53:WRAP53:EFNB3:DNAH2	3881	4330	A	G	0.122701		0.9246	(0.844-1.012)	0.116111		0.936	(0.842-1.039)	0.212988	0.889	(0.724-1.091)	0.259205	0.671976
rs13171253	5	43160433	GPRC5A:MIR614:GPRC5D:HEBP1	3881	4330	G	A	0.122336		0.9222	(0.842-1.01)	0.10489		0.932	(0.839-1.035)	0.188539	0.891	(0.725-1.094)	0.270739	0.711987
rs12656399	5	56026843	UBE2G2:SUMO3:PTTG1IP:ITGB2	3881	4330	A	G	0.102789		1.04	(0.945-1.144)	0.434148		1.029	(0.921-1.149)	0.612189	1.08	(0.873-1.336)	0.477573	0.700165
rs6453340	5	76962274	MIR4315-1:BRIP1:INTS2	3881	4330	C	A	0.0763001		1.008	(0.903-1.124)	0.892085		1.015	(0.894-1.151)	0.818803	0.984	(0.767-1.262)	0.900666	0.83518
rs2652217	5	76980244	DEAF1:TMEM80:EPS8L2:TALDO1	3881	4330	G	A	0.414992		0.9737	(0.916-1.035)	0.383455		0.976	(0.909-1.047)	0.493309	0.967	(0.841-1.111)	0.633384	0.910167
rs2546163	5	76995054	PMAIP1	3867	4316	A	G	0.326592		0.9473	(0.888-1.01)	0.0876524		0.961	(0.893-1.034)	0.289703	0.9	(0.778-1.041)	0.156471	0.441377
rs425463	5	79901952	CTRC:CELA2A:CELA2B:CASP9:DNAJC16	3874	4325	G	A	0.339005		0.9916	(0.933-1.054)	0.841241		1.014	(0.946-1.087)	0.687048	0.916	(0.799-1.05)	0.205762	0.198551
rs12517451	5	79920073	Intergenic	3881	4329	G	A	0.25		0.974	(0.911-1.041)	0.485		0.985	(0.911-1.063)	0.692	0.937	(0.803-1.094)	0.411	0.587
rs1650697	5	79950781	HSD17B12	3881	4329	G	A	0.247199		0.9714	(0.908-1.038)	0.439998		0.982	(0.908-1.061)	0.640491	0.936	(0.801-1.092)	0.399212	0.596767
rs6151599	5	79951032	REV3L	3877	4323	A	G	0.0846951		1.055	(0.952-1.168)	0.309838		1.095	(0.975-1.229)	0.125122	0.92	(0.711-1.189)	0.524007	0.238405
rs29635	5	85156821	UPK3A:FAM118A:SMC1B	3848	4296	A	G	0.267989		0.9882	(0.923-1.057)	0.7412		1.026	(0.949-1.109)	0.512775	0.862	(0.736-1.009)	0.0636742	0.0553337
rs17772583	5	131953510	MRE11A:ANKRD49:LOC643037	3881	4330	A	G	0.246681		1.012	(0.943-1.084)	0.72533		0.992	(0.915-1.075)	0.841266	1.082	(0.926-1.263)	0.319767	0.344126
rs1432693	5	147609136	PURG:WRN	3880	4329	A	G	0.0697405		0.9463	(0.840-1.065)	0.352012		0.916	(0.799-1.048)	0.201151	1.054	(0.828-1.342)	0.668382	0.318305
rs7707008	5	170801952		3880	4330	G	A	0.170767		1.105	(1.024-1.192)	0.0153919		1.152	(1.056-1.255)	0.00135211	0.95	(0.796-1.133)	0.565836	0.0588678
rs4302608	5	170840504	NEDD9	3880	4329	G	A	0.436959		0.9708	(0.914-1.03)	0.365569		0.928	(0.865-0.993)	0.0329572	1.135	(0.994-1.296)	0.0598333	0.0098878
rs359445	5	173285204	SIGIRR:ANO9:PTDSS2:RNH1	3878	4323	A	G	0.156139		0.9553	(0.881-1.035)	0.302378		0.979	(0.891-1.075)	0.652791	0.875	(0.718-1.066)	0.184749	0.336218
rs7722173	5	176384683	UIMC1	3879	4325	A	G	0.05		0.978	(0.859-1.113)	0.696		0.98	(0.844-1.137)	0.79	0.971	(0.721-1.307)	0.848	0.96
rs726230	6	11200574	RPS6KA2	3881	4330	A	C	0.193034		1.048	(0.974-1.128)	0.215235		1.026	(0.942-1.118)	0.55383	1.129	(0.954-1.335)	0.156988	0.335149
rs206776	6	12871099	PYCRL:TSTA3:ZNF623:ZNF707:BREA2	3868	4312	G	A	0.316137		0.9707	(0.911-1.034)	0.367237		0.942	(0.876-1.012)	0.102063	1.076	(0.938-1.233)	0.294925	0.0947359
rs9468322	6	28231243	LOC440300:CPEB1:AP3B2:LOC338963	3880	4329	G	A	0.0435498		1.235	(1.08-1.412)	0.0041813		1.302	(1.122-1.511)	0.000512397	1.002	(0.719-1.397)	0.988922	0.165197
rs3130000	6	30628082	ZNF131	3880	4330	G	A	0.0786236		1.026	(0.920-1.143)	0.683639		0.952	(0.832-1.089)	0.471824	1.292	(1.036-1.612)	0.0230199	0.0264555
rs1077394	6	31610384	TRPT1:NUDT22:DNAJC4:VEGFB:FKBP2:PPP1R14B:PLCB3:BAD:GPR137:KCNK4:C11orf20:ESRRA:TRMT112:PRDX5	3881	4330	A	G	0.318353		0.9939	(0.933-1.058)	0.844467		0.962	(0.893-1.036)	0.300945	1.112	(0.964-1.282)	0.14397	0.0894635
rs1144708	6	31710020	BUB1B:PAK6	3881	4330	G	A	0.365972		1.001	(0.941-1.064)	0.99826		1.006	(0.938-1.078)	0.87625	0.985	(0.864-1.123)	0.824953	0.790016
rs1480380	6	32913246	TTK	3881	4330	G	A	0.0840945		1.035	(0.927-1.154)	0.557414		1.027	(0.905-1.164)	0.682702	1.063	(0.845-1.338)	0.599931	0.792813
rs9296095	6	33542523	DOCK1	3881	4329	A	G	0.198843		0.976	(0.908-1.049)	0.533305		1.009	(0.928-1.096)	0.838021	0.866	(0.732-1.024)	0.0920587	0.117975
rs396746	6	33557045	DDR2:HSD17B7:C1orf110	3876	4323	C	A	0.129406		0.9712	(0.888-1.062)	0.530792		0.913	(0.821-1.015)	0.0908075	1.181	(0.976-1.429)	0.0871092	0.0239534
rs733590	6	36645203	NECAB1	3880	4326	A	G	0.374056		1.004	(0.945-1.066)	0.912639		1.006	(0.939-1.078)	0.854796	0.996	(0.87-1.14)	0.953209	0.895356
rs3176326	6	36647289	RBMS3	3880	4329	G	A	0.214521		1.003	(0.934-1.077)	0.968411		1.005	(0.925-1.091)	0.907913	0.997	(0.843-1.178)	0.97165	0.936367
rs2269058	6	37324857	FRY:ZAR1L:BRCA2	3881	4329	C	A	0.50067		1.011	(0.954-1.072)	0.617222		1.017	(0.950-1.088)	0.625074	0.992	(0.873-1.127)	0.900793	0.739462
rs2284923	6	37348920	ASCL2:C11orf21:TSPAN32	3881	4330	G	A	0.463951		0.9939	(0.937-1.054)	0.94423		1.002	(0.936-1.074)	0.944222	0.965	(0.846-1.1)	0.58958	0.619266
rs17254634	6	80751942	PLEC:PARP10:GRINA:SPATC1:OPLAH	3878	4328	G	A	0.181696		1.002	(0.928-1.081)	0.868691		1.001	(0.915-1.095)	0.983523	1.005	(0.845-1.195)	0.955541	0.969075
rs2179070	6	102871259	LOC222699:ZNF193:ZKSCAN4:NKAPL:ZNF187:PGBD1	3880	4330	A	G	0.0700365		1.014	(0.903-1.138)	0.727028		1.082	(0.948-1.234)	0.241297	0.784	(0.575-1.067)	0.121258	0.0710324
rs1268166	6	109008232	MIR548I4:MZT1:C13orf34	3881	4330	A	G	0.347826		0.977	(0.918-1.04)	0.463315		0.923	(0.857-0.992)	0.0306225	1.182	(1.028-1.359)	0.0191803	0.00269537
rs9386747	6	109038738	MIR4315-1:XYLT2:MRPL27:EME1:LRRC59	3880	4330	A	G	0.113581		1.058	(0.969-1.154)	0.252086		1.065	(0.961-1.179)	0.22901	1.035	(0.846-1.265)	0.738104	0.812541
rs12208908	6	109048366	UBE2G2:SUMO3:PTTG1IP	3881	4329	G	A	0.213825		1.055	(0.981-1.133)	0.153233		1.077	(0.993-1.169)	0.0730554	0.975	(0.83-1.146)	0.762266	0.288202
rs465969	6	111655530	NHEJ1:SLC23A3:C2orf24:FAM134A	3867	4314	G	A	0.0911258		0.9421	(0.846-1.049)	0.288115		0.979	(0.866-1.105)	0.72936	0.82	(0.635-1.058)	0.126333	0.231275
rs13210247	6	111922720	FAM164A	3881	4330	A	G	0.0700889		1.009	(0.898-1.133)	0.792256		1.073	(0.94-1.225)	0.296471	0.792	(0.585-1.072)	0.13173	0.0840912
rs809193	6	112020414	SHFM1	3880	4329	A	G	0.221221		0.9615	(0.896-1.032)	0.319183		0.981	(0.905-1.064)	0.647552	0.895	(0.764-1.047)	0.164321	0.313946
rs2280152	6	112375889	SLC38A9	3881	4327	A	G	0.27723		0.9519	(0.892-1.016)	0.135624		0.951	(0.882-1.025)	0.188028	0.955	(0.828-1.1)	0.523394	0.962513
rs3777947	6	112433664	ESR2:TEX21P	3880	4329	A	G	0.27549		0.9517	(0.892-1.015)	0.134536		0.956	(0.887-1.029)	0.230139	0.939	(0.814-1.083)	0.387047	0.835819
rs4710127	6	167276041	CDK1	3866	4321	G	A	0.18621		0.9697	(0.899-1.046)	0.39082		0.982	(0.899-1.072)	0.680913	0.929	(0.779-1.106)	0.408693	0.594481
rs9457245	6	167340715	MAP4	3881	4327	G	A	0.0787646		0.9489	(0.849-1.06)	0.321675		0.922	(0.810-1.05)	0.220057	1.042	(0.818-1.327)	0.738782	0.397624
rs210170	6	217036441	ABHD16A:LY6G6F:LY6G6E:LY6G6D:LY6G6C:C6orf25:DDAH2:CLIC1:MSH5:C6orf26:C6orf27:VARS	3881	4328	G	A	0.346936		1.026	(0.963-1.092)	0.411165		0.991	(0.922-1.065)	0.8121	1.155	(1.007-1.325)	0.0399502	0.0581982
rs12666800	7	45906594	LOC643749:TRAF3IP2	3874	4326	G	A	0.120976		1.024	(0.938-1.119)	0.585809		1.051	(0.951-1.161)	0.32568	0.933	(0.762-1.143)	0.505918	0.30852
rs7804722	7	92288106	FANCD2:C3orf24:C3orf10:VHL	3875	4327	A	G	0.310107		1.055	(0.990-1.123)	0.106251		1.032	(0.960-1.109)	0.391783	1.135	(0.992-1.299)	0.065236	0.230788
rs6968090	7	96318575	MAP3K1:C5orf35:MIER3	3865	4304	A	G	0.214225		0.974	(0.906-1.047)	0.494765		0.982	(0.901-1.07)	0.683782	0.945	(0.798-1.118)	0.506688	0.697201
rs10241838	7	96343665	XAF1:FBXO39:TEKT1:ALOX12P2	3871	4324	A	G	0.340024		1.029	(0.965-1.096)	0.391282		0.992	(0.923-1.066)	0.833519	1.16	(1.009-1.333)	0.0363417	0.0546413
rs11574158	8	30891353	MANBA:UBE2D3	3879	4329	G	A	0.0316155		0.552	(0.263-1.156)	0.863022		0.963	(0.789-1.174)	0.707091	1.074	(0.760-1.516)	0.685773	0.60146
rs11574398	8	31025343	RBBP8	3881	4330	G	A	0.359579		0.9915	(0.932-1.054)	0.85277		0.999	(0.931-1.073)	0.987858	0.965	(0.841-1.106)	0.604946	0.660927
rs13279327	8	48442384	PIK3CG	3880	4330	A	G	0.305725		1.031	(0.968-1.098)	0.401733		1.081	(1.005-1.163)	0.0353954	0.869	(0.748-1.009)	0.0653944	0.0122522
rs6982040	8	48708742	PRKDC	3876	4327	G	A	0.00402292		0.4968	(0.292-0.8426)	0.00271291		0.49	(0.252-0.9521)	0.0353125	0.514	(0.144-1.829)	0.3039	0.952804
rs1011683	8	91020834	EI24:STT3A:CHEK1	3881	4330	A	C	0.327609		1.007	(0.947-1.071)	0.763451		1.003	(0.934-1.077)	0.936606	1.022	(0.892-1.171)	0.750394	0.810153
rs2450551	8	95351843	PTPN22:BCL2L15:AP4B1:DCLRE1B:HIPK1	3879	4328	C	A	0.0453881		0.9744	(0.849-1.118)	0.683738		1.089	(0.934-1.268)	0.27634	0.591	(0.385-0.905)	0.0156125	0.0107753
rs10104637	8	95393925	MAP3K10:TTC9B:CNTD2:AKT2:MIR641	3881	4330	A	G	0.0398246		0.9294	(0.801-1.077)	0.316349		0.9	(0.751-1.077)	0.250413	1.031	(0.750-1.416)	0.850012	0.485717
rs2445614	8	128212594	TFDP1:ATP4B:GRK1	3881	4330	G	A	0.245524		1.01	(0.943-1.081)	0.728638		1.046	(0.967-1.13)	0.257713	0.891	(0.765-1.039)	0.140178	0.071467
rs28631372	9	1721654	MLXIP:LRRC43:IL31:B3GNT4:DIABLO:VPS33A	3858	4296	G	A	0.25742		1.013	(0.947-1.083)	0.69965		0.981	(0.907-1.061)	0.631672	1.128	(0.976-1.304)	0.102256	0.102707
rs12004745	9	21812349	MTAP	3881	4330	T	A	0.05		0.856	(0.745-0.9831)	0.022		0.903	(0.773-1.055)	0.198	0.701	(0.491-1)	0.05	0.213
rs2069422	9	32953711	LOC157381:ZNF572:SQLE:KIAA0196	3879	4328	A	C	0.106068		0.9716	(0.885-1.066)	0.544946		0.927	(0.831-1.033)	0.167631	1.132	(0.935-1.371)	0.201841	0.079946
rs10972278	9	35000289	C12orf71	3881	4330	A	G	0.294179		0.9547	(0.894-1.019)	0.14638		0.964	(0.895-1.038)	0.335513	0.924	(0.798-1.069)	0.289059	0.617005
rs595429	9	35055669		3881	4329	G	A	0.457004		0.9778	(0.922-1.036)	0.449378		0.97	(0.906-1.038)	0.380867	1.005	(0.880-1.147)	0.943191	0.656178
rs4877005	9	92325852	LOC100129066	3871	4320	A	G	0.38		0.942	(0.885-1.002)	0.055		0.916	(0.852-0.9839)	0.016	1.036	(0.903-1.189)	0.611	0.128
rs16923815	9	100480357	NPAT:ATM	3881	4326	G	A	0.308273		0.9767	(0.916-1.041)	0.493089		0.952	(0.884-1.026)	0.197199	1.066	(0.925-1.228)	0.375677	0.180804
rs2039971	9	120233601	NHEDC2:BDH2:CENPE	3877	4329	C	A	0.0476481		0.8755	(0.760-1.008)	0.0543411		0.927	(0.792-1.084)	0.341338	0.708	(0.491-1.019)	0.0631371	0.197334
rs6597642	9	133725767	DHFR:MTRNR2L2:MSH3	3881	4329	G	A	0.130633		1.012	(0.929-1.102)	0.743602		0.988	(0.893-1.093)	0.810848	1.097	(0.913-1.318)	0.320354	0.339293
rs1056171	9	133761001	CCDC117:XBP1	3879	4324	A	G	0.475009		0.9925	(0.937-1.051)	0.765534		0.963	(0.901-1.029)	0.268382	1.102	(0.968-1.254)	0.141001	0.0778608
rs11535662	9	140143801	PPP1R10:MRPS18B:ATAT1:C6orf136:DHX16:KIAA1949:NRM:MDC1	3878	4328	G	A	0.0703753		0.9724	(0.866-1.091)	0.600879		0.967	(0.845-1.105)	0.618983	0.992	(0.770-1.277)	0.951733	0.861271
rs1904415	10	21607600	FBXO2:FBXO44:FBXO6:MAD2L2:C1orf187	3852	4306	A	C	0.240684		0.9604	(0.896-1.028)	0.24878		0.939	(0.867-1.017)	0.122505	1.036	(0.892-1.203)	0.639574	0.267407
rs788209	10	27434716	UBE2G2:SUMO3	3870	4315	A	C	0.140073		0.9943	(0.915-1.08)	0.96323		0.982	(0.890-1.082)	0.709277	1.038	(0.853-1.263)	0.707685	0.630857
rs10764686	10	27475494	SBNO2:STK11:C19orf26:ATP5D:MIDN	3822	4269	G	A	0.35212		0.9919	(0.932-1.055)	0.825909		0.964	(0.896-1.036)	0.314663	1.095	(0.950-1.262)	0.208329	0.13156
rs1937881	10	62540453	ANKRD26:YME1L1:MASTL:ACBD5	3881	4330	G	A	0.182499		1.024	(0.948-1.104)	0.558399		1.048	(0.960-1.144)	0.292953	0.94	(0.790-1.117)	0.483081	0.285864
rs12411618	10	94052164	WISP1:NDRG1	3880	4328	G	A	0.139742		1.003	(0.922-1.09)	0.94337		0.986	(0.895-1.085)	0.766722	1.063	(0.885-1.275)	0.513021	0.482015
rs6584354	10	102007714	DNHD1:RRP8:ILK:TAF10:TPP1:DCHS1	3848	4277	A	C	0.498585		0.9589	(0.903-1.018)	0.181595		0.964	(0.900-1.032)	0.291214	0.943	(0.828-1.072)	0.369187	0.768701
rs11574852	10	104161475	FAM164A	3775	4206	A	C	0.0340809		1.072	(0.911-1.26)	0.427918		1.092	(0.906-1.315)	0.353991	1	(0.676-1.477)	0.997849	0.69844
rs4147155	10	104536771	CHUK:CWF19L1:SNORA12:BLOC1S2:PKD2L1	3881	4330	G	A	0.138351		1.067	(0.980-1.162)	0.115151		1.097	(0.997-1.208)	0.0572263	0.965	(0.798-1.166)	0.71098	0.236891
rs2227309	10	111885752	CASP7	3880	4327	G	A	0.25		1.008	(0.943-1.078)	0.814		0.982	(0.907-1.063)	0.653	1.103	(0.948-1.283)	0.204	0.198
rs2419851	10	115380608	FANCA:SPIRE2	3881	4330	C	A	0.110096		1.018	(0.928-1.116)	0.729519		1.028	(0.924-1.143)	0.610464	0.983	(0.804-1.201)	0.868765	0.706301
rs4353229	10	115489589	WWOX	3878	4320	A	G	0.254574		1.008	(0.943-1.078)	0.814991		0.982	(0.907-1.063)	0.660349	1.101	(0.946-1.281)	0.212252	0.205903
rs1127687	10	115490109	TOLLIP:LOC255512:BRSK2	3880	4328	G	A	0.228436		1.03	(0.962-1.102)	0.392503		1.035	(0.955-1.12)	0.402448	1.014	(0.869-1.183)	0.861653	0.824111
rs12255933	10	126579158	FAM175A:AGPAT9	3881	4330	C	A	0.172634		0.9696	(0.898-1.046)	0.41364		0.96	(0.878-1.048)	0.362765	1.003	(0.840-1.196)	0.977033	0.673877
rs9667035	11	1907653	ARPC3:GPN3:C12orf24:VPS29:RAD9B	3859	4306	G	A	0.031537		1.081	(0.922-1.267)	0.337134		1.1	(0.918-1.317)	0.299145	1.012	(0.710-1.441)	0.949095	0.685591
rs11606458	11	6623918	PKP3:SIGIRR:ANO9:PTDSS2:RNH1	3880	4330	G	A	0.250183		0.9656	(0.902-1.033)	0.308084		0.956	(0.883-1.035)	0.269164	0.998	(0.857-1.161)	0.977999	0.635181
rs2255538	11	6629042	SLC4A7	3874	4326	G	A	0.260305		0.9576	(0.894-1.025)	0.224427		0.954	(0.881-1.033)	0.245453	0.969	(0.833-1.126)	0.680735	0.861541
rs7928685	11	6773439	C9orf131:VCP:FANCG:PIGO:STOML2:KIAA1539	3881	4330	A	G	0.163561		0.9553	(0.883-1.033)	0.249656		0.923	(0.841-1.012)	0.0877594	1.071	(0.901-1.273)	0.432799	0.14701
rs10838158	11	43752522	CELA2A:CELA2B:CASP9:DNAJC16	3871	4325	A	G	0.307528		0.9942	(0.932-1.06)	0.818277		1.024	(0.951-1.101)	0.52885	0.896	(0.773-1.038)	0.144064	0.119948
rs7110437	11	43780553	PRKAR2B	3881	4330	A	C	0.305505		0.9966	(0.935-1.062)	0.876698		1.029	(0.956-1.106)	0.445295	0.89	(0.766-1.033)	0.124323	0.0940881
rs7118659	11	43817125	OS9:AGAP2:LOC100130776:TSPAN31:CDK4:MARCH9:CYP27B1:METTL1:FAM119B:TSFM:AVIL	3880	4330	A	G	0.310049		1	(0.938-1.066)	0.970546		1.034	(0.961-1.112)	0.363839	0.889	(0.767-1.03)	0.116704	0.0763938
rs7131110	11	43846850	HSD17B12	3874	4324	G	A	0.31		1	(0.938-1.066)	0.96		1.029	(0.956-1.107)	0.444	0.904	(0.779-1.048)	0.181	0.133
rs4647709	11	47237359	CASP10:CASP8:ALS2CR12	3880	4330	G	A	0.0897686		0.9221	(0.833-1.02)	0.122527		0.903	(0.802-1.016)	0.0884697	0.988	(0.788-1.238)	0.91928	0.496365
rs326222	11	47259668	ALPL:RAP1GAP	3881	4330	G	A	0.279686		0.9511	(0.889-1.017)	0.133567		0.938	(0.868-1.012)	0.100411	0.999	(0.866-1.153)	0.992688	0.448121
rs2279238	11	47282024	CAB39:ITM2C	3881	4330	G	A	0.143649		1.01	(0.926-1.101)	0.887788		0.996	(0.901-1.101)	0.93882	1.058	(0.876-1.276)	0.557759	0.587351
rs660442	11	64042997	FYN	3874	4324	G	A	0.212064		0.9813	(0.913-1.054)	0.62518		0.98	(0.903-1.062)	0.62019	0.987	(0.845-1.153)	0.871778	0.93155
rs4244812	11	65480768	CDC7	3879	4326	A	G	0.479707		0.9925	(0.936-1.052)	0.82965		1.023	(0.956-1.094)	0.503048	0.893	(0.785-1.015)	0.0830592	0.0683586
rs656040	11	65621057	CPEB4	3878	4326	G	A	0.327584		0.9576	(0.899-1.019)	0.177365		0.943	(0.877-1.013)	0.107676	1.011	(0.877-1.163)	0.882942	0.402112
rs3212907	11	69468776	ARFGAP2:PACSIN3:DDB2:ACP2:NR1H3	3881	4330	G	A	0.039581		1.062	(0.903-1.248)	0.420837		1.048	(0.875-1.254)	0.609914	1.113	(0.813-1.524)	0.504288	0.733414
rs6592537	11	70172975	HRAS:LRRC56:C11orf35:RASSF7:MIR210:LOC143666:PHRF1:IRF7:CDHR5:SCT	3881	4330	G	A	0.113872		1.047	(0.959-1.144)	0.295815		1.08	(0.974-1.196)	0.141645	0.938	(0.751-1.172)	0.575479	0.28334
rs4435030	11	74806005	GPR19:CDKN1B:APOLD1:MIR613	3881	4330	C	A	0.385946		0.9532	(0.898-1.012)	0.136949		0.943	(0.880-1.01)	0.0942643	0.99	(0.864-1.133)	0.87868	0.542841
rs12271212	11	77197817	MYO9B:USE1:OCEL1:NR2F6:USHBP1:C19orf62:ANKLE1:ABHD8	3881	4330	G	A	0.232797		1.001	(0.933-1.075)	0.997615		1.057	(0.975-1.146)	0.175774	0.817	(0.689-0.969)	0.0203339	0.00862922
rs10765682	11	94198269	MMAB:MVK	3881	4330	A	G	0.0995616		0.9972	(0.906-1.098)	0.939689		1.014	(0.908-1.132)	0.800435	0.938	(0.742-1.186)	0.593702	0.570109
rs511484	11	100918433	MIR1972-2:ABCC11:LONP2	3880	4329	G	C	0.257888		0.962	(0.899-1.029)	0.260907		0.961	(0.887-1.04)	0.322347	0.964	(0.820-1.133)	0.657235	0.971128
rs2957873	11	104108743	ZNF131:MGC42105	3881	4329	A	G	0.177832		0.9914	(0.914-1.075)	0.758683		0.988	(0.901-1.083)	0.799201	1.003	(0.841-1.196)	0.973136	0.884344
rs6589007	11	108040104	ATE1:NSMCE4A:TACC2	3881	4330	G	A	0.423883		1.005	(0.947-1.067)	0.910576		1.013	(0.943-1.086)	0.728493	0.98	(0.854-1.124)	0.770606	0.687505
rs183459	11	108089197	MIR1972-2:PRKCB	3880	4330	A	C	0.416139		1.006	(0.947-1.068)	0.888821		1.013	(0.943-1.086)	0.726875	0.983	(0.857-1.126)	0.801785	0.711987
rs228592	11	108123189	TALDO1:PDDC1:CEND1:SLC25A22:LRDD:RPLP2:SNORA52:PNPLA2:EFCAB4A:CD151:POLR2L:TSPAN4	3869	4317	A	C	0.42701		0.996	(0.938-1.057)	0.852445		1.002	(0.934-1.074)	0.956906	0.9758	(0.852-1.117)	0.722722	0.742203
rs17140162	11	125490616	CDKN1A	3881	4330	C	A	0.00133967		1.731	(1.006-2.979)	0.197316		NA	(NA-NA)	NA	NA	(NA-NA)	NA	NA
rs7967755	12	986004	PLEC:MIR661:PARP10:GRINA:SPATC1	3881	4330	A	G	0.158629		0.9547	(0.881-1.035)	0.252158		0.949	(0.864-1.042)	0.269361	0.974	(0.816-1.162)	0.768337	0.801277
rs207928	12	7583083	XRCC5	3881	4330	G	A	0.41		0.981	(0.929-1.047)	0.584		0.959	(0.894-1.028)	0.235	1.085	(0.947-1.244)	0.238	0.124
rs1291351	12	13084082	CASP7:C10orf81	3881	4330	C	G	0.0236268		0.7544	(0.607-0.936)	0.831906		1.066	(0.853-1.331)	0.575114	0.847	(0.541-1.322)	0.464012	0.38867
rs2069502	12	22008026	USP7	3880	4330	G	A	0.304811		1.028	(0.965-1.095)	0.370549		1.033	(0.959-1.111)	0.388414	1.012	(0.874-1.17)	0.877497	0.809396
rs708170	12	27237085	MIR4315-1:GH2:CSH1:CSHL1:GH1:CD79B:SCN4A	3871	4321	G	A	0.306274		0.9852	(0.925-1.049)	0.64079		0.973	(0.902-1.043)	0.410104	1.038	(0.902-1.194)	0.600528	0.410104
rs922275	12	27402709	BAK1:GGNBP1:C6orf227:ITPR3	3881	4327	G	A	0.354167		0.9834	(0.926-1.044)	0.632166		1.003	(0.936-1.075)	0.931833	0.917	(0.796-1.055)	0.227408	0.276746
rs10842893	12	27422886	RYK	3875	4312	G	A	0.0960669		1.013	(0.917-1.118)	0.85179		0.968	(0.863-1.086)	0.582819	1.171	(0.955-1.435)	0.12871	0.115964
rs17497606	12	27494449	CIT:MIR1178	3877	4322	G	A	0.222527		0.9999	(0.93-1.075)	0.983037		1.031	(0.949-1.119)	0.468971	0.895	(0.755-1.06)	0.200051	0.14973
rs2066827	12	28318008	WWOX	3874	4318	A	C	0.248047		1.04	(0.969-1.115)	0.222663		1.054	(0.973-1.141)	0.196527	0.991	(0.845-1.162)	0.912771	0.509011
rs10876864	12	56401085	STK38L	3880	4326	A	G	0.406958		0.992	(0.935-1.052)	0.803084		0.97	(0.905-1.04)	0.387618	1.071	(0.933-1.23)	0.329	0.227408
rs703842	12	58162739	CYP27B1/METTL1	3770	4257	A	G	0.31		1.016	(0.953-1.082)	0.591		1.022	(0.950-1.1)	0.555	0.994	(0.859-1.151)	0.939	0.747
rs2162679	12	67400490	NANOS1:EIF3A:SNORA19	3879	4329	A	G	0.163621		0.9474	(0.875-1.026)	0.186268		0.935	(0.851-1.026)	0.154627	0.992	(0.827-1.189)	0.930453	0.582944
rs7971725	12	98981483		3881	4330	T	A	6.08939e-05			(-)	0.505116		NA	(NA-NA)	NA	NA	(NA-NA)	NA	NA
rs12368451	12	99115661	NBN:DECR1	3784	4218	A	G	0.4507		1.015	(0.955-1.078)	0.604165		0.989	(0.922-1.06)	0.756696	1.111	(0.972-1.269)	0.121646	0.13828
rs10160981	12	110904075	WNK1:RAD52	3879	4327	G	A	0.194126		1.018	(0.946-1.096)	0.56352		0.97	(0.891-1.055)	0.476963	1.196	(1.023-1.398)	0.0247971	0.0217085
rs1502337	12	111062852	SNTB1	3881	4328	G	A	0.339993		0.9916	(0.932-1.054)	0.927725		0.957	(0.892-1.027)	0.225978	1.117	(0.975-1.28)	0.110155	0.0538288
rs904654	12	120189888	NFKB1	3880	4329	G	A	0.472713		0.9969	(0.940-1.056)	0.926931		1.039	(0.971-1.112)	0.266824	0.862	(0.750-0.9892)	0.0345354	0.0217334
rs6490269	12	120207175	PPFIA1:MIR548K	3854	4290	G	A	0.493247		0.9976	(0.941-1.057)	0.936197		1.034	(0.965-1.107)	0.340353	0.881	(0.768-1.01)	0.0693221	0.0491858
rs11060333	12	122678607	RAP1A:C1orf183	3876	4326	A	G	0.250305		0.9443	(0.883-1.01)	0.0975964		0.957	(0.886-1.033)	0.255312	0.903	(0.780-1.046)	0.173319	0.502193
rs3850952	12	124090802	FOXO3:NCRNA00222	3876	4326	C	A	0.28932		1.018	(0.953-1.086)	0.589307		1.029	(0.954-1.109)	0.462972	0.981	(0.845-1.139)	0.802835	0.590991
rs10846535	12	124130388	CPEB2	3880	4330	A	G	0.427223		1.035	(0.976-1.098)	0.257578		1.038	(0.969-1.111)	0.28523	1.027	(0.901-1.171)	0.687322	0.895387
rs203343	12	211831380	SNX18	3877	4328	A	G	0.175137		0.9952	(0.921-1.075)	0.857129		1.029	(0.940-1.126)	0.536109	0.881	(0.729-1.064)	0.188028	0.162371
rs9509492	13	21608971	ARTN:IPO13:DPH2:ATP6V0B:B4GALT2:CCDC24:SLC6A9	3881	4330	G	A	0.292047		0.9944	(0.930-1.063)	0.856274		1.019	(0.945-1.099)	0.621332	0.912	(0.789-1.053)	0.207326	0.17923
rs7328482	13	21877418	RPA1:RTN4RL1	3881	4330	A	C	0.0396419		1.035	(0.886-1.208)	0.638717		1.096	(0.921-1.303)	0.301851	0.826	(0.563-1.212)	0.328779	0.199504
rs1887894	13	68676932	LATS2	3881	4330	G	A	0.27		0.97	(0.905-1.038)	0.371		0.99	(0.916-1.069)	0.792	0.903	(0.777-1.05)	0.184	0.295
rs4119478	13	73254212	SNX32:CFL1:MUS81:EFEMP2:CTSW:FIBP:CCDC85B:FOSL1	3879	4325	G	A	0.305217		1.007	(0.944-1.073)	0.796022		1.016	(0.943-1.094)	0.677459	0.976	(0.847-1.123)	0.729686	0.626236
rs1408047	13	103484918	CIT	3881	4330	A	G	0.298746		1.003	(0.939-1.072)	0.925121		1.008	(0.934-1.087)	0.835575	0.987	(0.860-1.132)	0.85051	0.791453
rs12870278	13	103543243	CCDC109B:CASP6:PLA2G12A:CFI	3880	4330	G	A	0.188368		0.9359	(0.868-1.009)	0.0799368		0.921	(0.844-1.005)	0.0645282	0.989	(0.844-1.157)	0.885764	0.449663
rs11164141	13	114259570	LOC100129269:RAP1A	3880	4328	A	G	0.370492		1.056	(0.993-1.122)	0.0757054		1.074	(1.001-1.152)	0.0467601	0.996	(0.867-1.144)	0.954059	0.352121
rs4150792	13	114288971	IGF1	3881	4329	G	A	0.371194		1.056	(0.993-1.122)	0.0758298		1.07	(0.997-1.148)	0.0572952	1.007	(0.878-1.156)	0.915642	0.452093
rs2232642	13	115489167		3880	4329	G	A	0.000182726			(-)	0.780051		0.494	(0.062-3.875)	0.502098	1.695	(0.308-9.324)	0.54437	0.388702
rs3020445	14	47249294	PEX2	3881	4330	G	A	0.429728		1.046	(0.985-1.11)	0.140029		1.067	(0.997-1.142)	0.0603769	0.973	(0.854-1.108)	0.681717	0.222683
rs12880109	14	68813032	SILV:CDK2:RAB5B:SUOX:IKZF4:RPS26	3881	4330	A	G	0.406102		0.9912	(0.932-1.054)	0.823781		0.997	(0.929-1.069)	0.92478	0.973	(0.850-1.113)	0.686865	0.757964
rs17105760	14	68984500	FAM53A:SLBP:TMEM129:TACC3	3881	4330	A	G	0.00188771		0.705	(0.390-1.274)	0.290293		0.437	(0.135-1.404)	0.164431	1.64	(0.554-4.855)	0.371452	0.1746
rs17106237	14	69203145	ACAT1:NPAT	3881	4328	G	A	0.128517		1.032	(0.946-1.125)	0.481366		1.012	(0.913-1.121)	0.817687	1.103	(0.912-1.333)	0.312756	0.45006
rs861537	14	104167075	ANKRD28	3860	4287	A	G	0.313919		0.9831	(0.922-1.048)	0.609661		1.007	(0.935-1.083)	0.855786	0.904	(0.780-1.047)	0.17791	0.211227
rs4983559	14	105277209	PAK7	3872	4326	A	G	0.391559		0.9971	(0.938-1.059)	0.964301		0.994	(0.928-1.064)	0.864825	1.008	(0.882-1.151)	0.907298	0.858688
rs2896489	14	43656535	FAM45A:FAM45B:SFXN4:PRDX3:GRK5	3881	4328	G	A	0.314289		0.981	(0.920-1.045)	0.563742		1.004	(0.933-1.08)	0.911906	0.903	(0.779-1.046)	0.174951	0.219139
rs2118612	15	33525680	SMAD3	3881	4330	A	G	0.21		1.044	(0.971-1.122)	0.277		1.066	(0.982-1.158)	0.127	0.966	(0.822-1.135)	0.677	0.296
rs1565866	15	40455894	UBE2G2:SUMO3:PTTG1IP	3881	4330	C	A	0.46322		1.02	(0.962-1.081)	0.568267		1.002	(0.937-1.071)	0.946963	1.083	(0.954-1.228)	0.216263	0.294266
rs7178873	15	40489387	OTP:TBCA	3881	4330	G	A	0.00176592		1.124	(0.652-1.935)	0.682958		1.226	(0.634-2.369)	0.544042	0.839	(0.125-5.591)	0.856175	0.734189
rs7165509	15	40945900	NFKB1	3881	4330	A	G	0.43052		0.958	(0.902-1.016)	0.172272		0.945	(0.881-1.013)	0.109114	1.004	(0.880-1.144)	0.956906	0.437588
rs12592524	15	41003463	NHEDC1:NHEDC2	3881	4330	A	G	0.415662		0.9732	(0.917-1.033)	0.407807		0.96	(0.904-1.039)	0.379013	0.986	(0.864-1.124)	0.833649	0.827436
rs570933	15	43824030	MIR4315-1:TOM1L1:COX11	3881	4330	A	G	0.322007		1.065	(1.001-1.133)	0.0548999		1.088	(1.013-1.168)	0.0198618	0.986	(0.858-1.133)	0.845725	0.223775
rs12902785	15	66928241	RPA1:RTN4RL1	3881	4330	A	G	0.316466		0.9706	(0.911-1.034)	0.350757		0.979	(0.909-1.054)	0.56844	0.942	(0.816-1.087)	0.412703	0.65199
rs6494633	15	67423306	CELA2B:CASP9:DNAJC16:AGMAT	3879	4328	G	A	0.433898		0.9927	(0.935-1.054)	0.871174		0.988	(0.923-1.057)	0.725056	1.01	(0.887-1.149)	0.882915	0.770882
rs4779041	15	83337059	ZFAT:ZFAT-AS1	3880	4330	G	A	0.349513		1.019	(0.958-1.083)	0.552306		1.013	(0.942-1.089)	0.721668	1.038	(0.904-1.192)	0.595263	0.766658
rs2268049	16	1371154	UBE2I:BAIAP3:C16orf42:GNPTG:UNKL	3880	4325	G	A	0.153687		1.116	(1.031-1.207)	0.00451324		1.102	(1.006-1.207)	0.0360022	1.169	(0.982-1.389)	0.0777175	0.560986
rs7302	16	1375263	CASP7:C10orf81	3854	4304	C	A	0.109708		1.036	(0.941-1.139)	0.458243		1.073	(0.962-1.196)	0.20198	0.907	(0.720-1.141)	0.404232	0.206756
rs1061621	16	1376892	UBE2I	3871	4317	G	A	0.16		1.092	(1.01-1.181)	0.017		1.073	(0.981-1.173)	0.123	1.163	(0.984-1.374)	0.076	0.406
rs8061528	16	3656482		3880	4330	G	A	0.212911		1.014	(0.945-1.088)	0.745283		1.01	(0.928-1.099)	0.808691	1.028	(0.868-1.218)	0.744745	0.86062
rs7195624	16	9010213	BARD1	3873	4318	C	A	0.296301		1.005	(0.941-1.072)	0.862648		1.009	(0.935-1.088)	0.822942	0.991	(0.857-1.146)	0.9022	0.836954
rs9927946	16	9083367	RYK	3879	4330	A	G	0.440979		0.9979	(0.939-1.06)	0.982559		0.988	(0.920-1.06)	0.737653	1.033	(0.898-1.188)	0.648655	0.589261
rs3136042	16	14014055	XPNPEP3:RBX1	3880	4329	G	A	0.020709		0.9678	(0.782-1.197)	0.753011		1.017	(0.797-1.296)	0.894637	0.798	(0.451-1.413)	0.438769	0.463097
rs2023671	16	15834360	SPEG:GMPPA:ACCN4:CHPF:TMEM198:MIR3132:OBSL1:INHA	3878	4328	A	C	0.265111		1.002	(0.937-1.071)	0.949992		0.981	(0.908-1.058)	0.61771	1.076	(0.928-1.246)	0.329414	0.281051
rs7135	16	19514483	TOP1MT:C8orf51:RHPN1	3881	4330	A	G	0.279747		0.978	(0.915-1.045)	0.525532		0.976	(0.904-1.052)	0.519946	0.988	(0.857-1.137)	0.860911	0.882327
rs12447418	16	19539858	ABL1:QRFP:FIBCD1	3881	4330	A	G	0.21319		0.9462	(0.880-1.017)	0.137388		0.922	(0.849-1.002)	0.0559012	1.032	(0.887-1.2)	0.683061	0.209193
rs9935995	16	19592730	STK4	3881	4328	G	A	0.231088		0.9566	(0.892-1.026)	0.220226		0.946	(0.873-1.024)	0.171819	0.996	(0.860-1.153)	0.959513	0.547674
rs249941	16	23644738	ID1:MIR3193:COX4I2:BCL2L1	3881	4329	G	A	0.195676		0.9514	(0.883-1.024)	0.190095		0.922	(0.844-1.006)	0.0673276	1.054	(0.891-1.247)	0.536428	0.179109
rs16947165	16	78159277	HSD17B12	3881	4330	A	G	0.305079		0.9994	(0.937-1.066)	0.978654		0.991	(0.920-1.066)	0.800282	1.03	(0.895-1.186)	0.676056	0.631598
rs12923828	16	78265497	TXNRD2:COMT:ARVCF	3881	4330	T	A	0.148094		0.9522	(0.877-1.033)	0.226374		0.92	(0.834-1.014)	0.0923457	1.067	(0.894-1.272)	0.473068	0.164321
rs6564520	16	78306219	STARD3:TCAP:PNMT:PGAP3:ERBB2:C17orf37:GRB7	3879	4330	G	A	0.406749		1.04	(0.978-1.105)	0.219082		0.985	(0.917-1.057)	0.670858	1.253	(1.096-1.433)	0.000966848	0.00238994
rs12051039	16	78488305	SULT1E1	3875	4325	A	C	0.0567683		1.048	(0.923-1.189)	0.473352		1.054	(0.913-1.216)	0.471012	1.026	(0.767-1.373)	0.860419	0.874691
rs11643201	16	83312375	ZRANB1:CTBP2:MIR4296	3881	4330	G	A	0.10285		1.054	(0.955-1.162)	0.27972		1.097	(0.981-1.226)	0.10355	0.907	(0.712-1.153)	0.423638	0.172049
rs6500437	16	89789898	ZNF276	3764	4140	A	G	0.28		0.956	(0.895-1.02)	0.1512		0.932	(0.864-1.006)	0.069	1.039	(0.899-1.199)	0.606	0.2
rs7195066	16	89836323	RAD21:NCRNA00255:MIR3610	3880	4329	G	A	0.307467		0.9776	(0.919-1.04)	0.481036		0.966	(0.898-1.038)	0.342112	1.02	(0.888-1.171)	0.781115	0.505822
rs4785722	16	89863110	ZNF276	3879	4330	A	G	0.29		0.952	(0.892-1.015)	0.121		0.926	(0.859-0.997)	0.041	1.046	(0.909-1.203)	0.528	0.136
rs11076628	16	89875246	NFKB1	3879	4328	A	G	0.371695		0.9468	(0.892-1.005)	0.0746552		0.93	(0.867-0.9967)	0.0399266	1.007	(0.881-1.151)	0.9185	0.312045
rs2745098	16	131932203	VRK2:FANCL	3878	4328	G	A	0.367597		0.9732	(0.916-1.033)	0.357453		0.974	(0.909-1.044)	0.459546	0.969	(0.84-1.106)	0.642567	0.945186
rs17734	17	1801144	CIT	3878	4322	A	G	0.410732		0.9732	(0.917-1.033)	0.393314		0.977	(0.913-1.046)	0.50563	0.959	(0.840-1.094)	0.533775	0.803907
rs17761467	17	1805677	38047	3881	4330	G	A	0.173121		1.01	(0.935-1.091)	0.807915		0.998	(0.910-1.093)	0.958429	1.055	(0.882-1.262)	0.557243	0.601193
rs2287498	17	7592560	TP53/WRAP53	3881	4330	G	A	0.07		1.057	(0.945-1.182)	0.34		1.1	(0.968-1.25)	0.144	0.912	(0.701-1.184)	0.488	0.219
rs8079273	17	7597478		3881	4330	G	A	0.0146145			(-)	0.141458		1.328	(1.022-1.726)	0.0335596	0.784	(0.399-1.538)	0.478886	0.153613
rs2278637	17	8062102	SNAR-A9:NUCB1:DHDH:BAX:FTL:GYS1:RUVBL2	3878	4324	A	C	0.347293		0.9965	(0.936-1.06)	0.900657		0.984	(0.916-1.056)	0.654156	1.041	(0.907-1.195)	0.562147	0.481838
rs3826392	17	11922904	BIVM:ERCC5:LOC121952	3880	4329	A	C	0.247655		1.044	(0.975-1.117)	0.197143		1.07	(0.990-1.155)	0.087705	0.957	(0.820-1.117)	0.579774	0.21432
rs4252596	17	37855834	ALPL:RAP1GAP	3881	4330	C	A	0.134636		1.044	(0.956-1.14)	0.304038		1.039	(0.940-1.147)	0.453134	1.062	(0.887-1.27)	0.513613	0.83417
rs9911630	17	41188342	APAF1:ANKS1B	3881	4330	A	G	0.343076		1.027	(0.965-1.092)	0.415284		1.018	(0.947-1.093)	0.632638	1.059	(0.925-1.213)	0.404943	0.613855
rs4794136	17	48433958	C10orf84	3879	4328	A	G	0.482576		1.018	(0.959-1.08)	0.545096		1.041	(0.972-1.115)	0.244406	0.942	(0.821-1.079)	0.384583	0.207041
rs12952884	17	49226051	MRPL36:NDUFS6	3864	4276	G	A	0.393612		0.9977	(0.939-1.06)	0.957262		0.986	(0.920-1.057)	0.698918	1.038	(0.912-1.181)	0.571247	0.500678
rs17817865	17	53032425	TXNRD2:COMT:ARVCF	3881	4330	G	A	0.27658		1.012	(0.947-1.081)	0.710124		1.016	(0.941-1.097)	0.677635	0.998	(0.862-1.154)	0.974748	0.828944
rs2070776	17	58144665	STK38L:ARNTL2	3878	4325	G	A	0.33951		0.9721	(0.914-1.033)	0.368138		1	(0.932-1.074)	0.992572	0.878	(0.763-1.01)	0.0681511	0.114572
rs8066463	17	61818390	MANBA	3881	4329	A	G	0.323021		0.9622	(0.904-1.023)	0.241606		0.99	(0.920-1.064)	0.781018	0.87	(0.751-1.007)	0.06111	0.135529
rs2078486	17	62007498	BARD1	3881	4329	G	A	0.0720463		1.056	(0.945-1.18)	0.343588		1.099	(0.967-1.247)	0.146148	0.912	(0.702-1.184)	0.489057	0.222527
rs3027247	17	64788644	IRS1:RHBDD1	3877	4329	A	C	0.294053		1.015	(0.952-1.082)	0.701774		0.99	(0.918-1.067)	0.790567	1.104	(0.962-1.267)	0.157611	0.182888
rs2239680	17	76219783	DHX29:SKIV2L2	3880	4329	A	G	0.27549		1.009	(0.945-1.076)	0.84714		0.99	(0.916-1.069)	0.791148	1.076	(0.925-1.252)	0.341071	0.350679
rs12966424	18	12678486	HSD17B12	3880	4330	A	G	0.444823		1.032	(0.971-1.095)	0.320383		1.025	(0.956-1.099)	0.476353	1.052	(0.923-1.199)	0.446548	0.739803
rs13381022	18	18532756	TK1:AFMID:BIRC5:EPR1:LOC283999	3880	4324	A	G	0.00944661		0.9918	(0.721-1.364)	0.946399		1.056	(0.762-1.464)	0.743124	0.773	(0.366-1.633)	0.500253	0.429713
rs11082221	18	20531677	RBBP8	3881	4330	A	G	0.04		1.03	(0.883-1.201)	0.677		0.986	(0.822-1.182)	0.881	1.183	(0.842-1.663)	0.332	0.369
rs9304261	18	20606596	ZNF517:ZNF7:COMMD5:ZNF250	3878	4325	G	A	0.209131		1.017	(0.947-1.091)	0.690097		1.017	(0.935-1.106)	0.69212	1.018	(0.864-1.198)	0.832299	0.994854
rs7234479	18	48405172	TSPAN1:POMGNT1:C1orf190:RAD54L	3881	4330	A	C	0.125929		0.9682	(0.888-1.055)	0.496307		0.936	(0.845-1.036)	0.199778	1.081	(0.891-1.311)	0.425564	0.210498
rs6567131	18	57579140	intergenic	3881	4326	C	G	0.45		1.059	(0.997-1.123)	0.063		1.088	(1.016-1.164)	0.016	0.964	(0.846-1.099)	0.585	0.115
rs9319956	18	57594068	C8ORFK29:FBXL6:GPR172A:ADCK5:CPSF1:MIR939:MIR1234:SLC39A4:VPS28:TONSL	3880	4330	A	C	0.466626		1.055	(0.994-1.12)	0.078793		1.086	(1.015-1.162)	0.017091	0.956	(0.839-1.089)	0.500394	0.0937368
rs3764640	19	1207238	WISP3:TUBE1:C6orf225	3878	4324	C	A	0.228176		1.019	(0.950-1.092)	0.617547		1.009	(0.930-1.094)	0.830394	1.053	(0.903-1.226)	0.510277	0.641028
rs7247515	19	20599564	MUC6:MUC2	3878	4325	G	A	0.0800317		1.084	(0.973-1.208)	0.160166		1.067	(0.942-1.208)	0.3039	1.143	(0.901-1.45)	0.269557	0.620119
rs16963425	19	30340724	HLA-DQA2:HLA-DQB2:HLA-DOB:TAP2	3878	4325	G	A	0.263501		1.047	(0.979-1.12)	0.175834		1.061	(0.981-1.147)	0.133701	1	(0.860-1.161)	0.996795	0.49856
rs751731	19	33463058	BAK1:GGNBP1:C6orf227	3880	4329	G	A	0.29626		0.9877	(0.926-1.053)	0.691012		1.02	(0.947-1.098)	0.60759	0.881	(0.756-1.026)	0.104007	0.104532
rs2298881	19	45926916		3871	4311	C	A	0.107125		1.032	(0.939-1.133)	0.451912		1.048	(0.940-1.169)	0.39562	0.974	(0.777-1.221)	0.820491	0.582944
rs17294094	19	48720926	CDC25A	3881	4329	A	G	0.444702		1.03	(0.971-1.093)	0.359365		1.032	(0.964-1.105)	0.3604	1.023	(0.895-1.169)	0.735747	0.909852
rs1805419	19	49459104	TBC1D22B:RNF8	3878	4330	G	A	0.266204		1.074	(1.004-1.149)	0.038519		1.097	(1.015-1.185)	0.0198618	0.996	(0.858-1.157)	0.961066	0.274524
rs3817074	19	49459212	KIAA1045:DNAJB5:C9orf131	3881	4329	G	A	0.117722		1.039	(0.947-1.138)	0.449433		1.065	(0.958-1.183)	0.24164	0.949	(0.770-1.168)	0.620761	0.342809
rs4813643	20	3787755	CASP8:ALS2CR12	3871	4325	A	G	0.421486		1.026	(0.967-1.088)	0.410744		1.052	(0.983-1.126)	0.142384	0.941	(0.826-1.071)	0.35579	0.143035
rs2422978	20	4763108	TFDP1:ATP4B	3878	4329	A	G	0.268795		1.059	(0.991-1.13)	0.0934791		1.042	(0.966-1.123)	0.286075	1.117	(0.971-1.285)	0.119337	0.39402
rs6086987	20	9685155	ZNF334:C20orf123:SLC13A3	3865	4317	A	G	0.0977145		1.054	(0.953-1.165)	0.262151		1.003	(0.894-1.125)	0.958567	1.234	(1.00-1.51)	0.0412431	0.08039
rs6133777	20	9995950	XRCC5	3881	4330	C	A	0.441664		0.9806	(0.924-1.04)	0.49132		0.981	(0.916-1.049)	0.573416	0.98	(0.862-1.113)	0.750275	0.986266
rs6060446	20	30231637	PTPN22:BCL2L15:AP4B1:DCLRE1B:HIPK1	3879	4330	A	G	0.207333		0.9352	(0.870-1.005)	0.0784259		0.94	(0.864-1.022)	0.146148	0.92	(0.774-1.092)	0.338238	0.828872
rs910671	20	43601921	MIR1972-2:TMC5:GDE1:CP110	3881	4327	C	A	0.499635		1.012	(0.954-1.073)	0.667417		1.01	(0.944-1.081)	0.765043	1.018	(0.894-1.159)	0.782223	0.916964
rs2267860	20	43655135	FRY:ZAR1L:BRCA2	3881	4330	A	G	0.496407		1.015	(0.957-1.076)	0.605344		1.012	(0.945-1.082)	0.737879	1.026	(0.901-1.167)	0.697582	0.853749
rs85021	20	45179495	PTP4A3:FLJ43860	3881	4330	A	G	0.351297		0.9673	(0.909-1.029)	0.283821		0.968	(0.901-1.039)	0.371034	0.965	(0.843-1.104)	0.603735	0.96886
rs16979815	20	54941087	ALOXE3:HES7:PER1:VAMP2:TMEM107:MIR3676:C17orf59:AURKB	3881	4329	G	A	0.171681		0.9836	(0.910-1.062)	0.703102		0.953	(0.869-1.044)	0.29937	1.094	(0.925-1.294)	0.292735	0.170334
rs4239838	21	46202309	MIR1972-2:NDUFAB1:PALB2:DCTN5:PLK1	3879	4328	A	G	0.434385		1.023	(0.964-1.085)	0.438554		1.02	(0.951-1.092)	0.581697	1.035	(0.906-1.181)	0.613576	0.851721
rs2838693	21	46222486	PRNT:RASSF2	3878	4327	C	A	0.114747		0.9943	(0.908-1.088)	0.874804		0.991	(0.891-1.1)	0.859906	1.007	(0.822-1.234)	0.945024	0.89008
rs235314	21	46271452	AP4B1:DCLRE1B:HIPK1:OLFML3	3877	4330	A	G	0.470818		0.9918	(0.936-1.051)	0.789247		0.994	(0.929-1.064)	0.864042	0.983	(0.862-1.121)	0.802556	0.888829
rs2838690	21	162781787	METTL6:EAF1:COLQ	3880	4329	G	A	0.169509		1.012	(0.936-1.093)	0.746503		1.014	(0.926-1.11)	0.75752	1.003	(0.848-1.186)	0.967687	0.913461
rs181390	22	18222263	ROCK1	3880	4328	G	A	0.326998		1.021	(0.958-1.087)	0.554465		1.054	(0.981-1.131)	0.147975	0.912	(0.796-1.045)	0.18363	0.0647632
rs9605031	22	19921378	LOC100294145:HLA-DMB:HLA-DMA:BRD2	3881	4326	G	A	0.308822		0.9992	(0.938-1.064)	0.939863		1.031	(0.958-1.108)	0.411175	0.894	(0.775-1.032)	0.127228	0.0896303
rs740603	22	19945177	NEK2	3878	4329	G	A	0.447545		1.005	(0.947-1.066)	0.815934		1.001	(0.934-1.071)	0.980993	1.017	(0.893-1.159)	0.794612	0.829758
rs9332362	22	19949103	C9orf53:CDKN2A:CDKN2B-AS1:CDKN2B	3876	4324	G	A	0.027561		0.8726	(0.728-1.045)	0.14035		0.915	(0.747-1.121)	0.392851	0.72	(0.458-1.133)	0.155444	0.352761
rs738200	22	28792887	DOCK3:MANF:RBM15B:VPRBP	3881	4328	G	A	0.0789378		1.084	(0.968-1.213)	0.139805		1.132	(0.998-1.282)	0.0520861	0.917	(0.718-1.171)	0.488377	0.129457
rs5762814	22	29203964	MSH2:KCNK12	3881	4329	G	A	0.137637		0.9813	(0.899-1.071)	0.610686		0.981	(0.887-1.084)	0.705218	0.983	(0.809-1.193)	0.861226	0.985312
rs738207	22	35829452	UBE3B:MMAB:MVK	3879	4329	G	A	0.213999		0.971	(0.903-1.043)	0.418505		0.956	(0.88-1.038)	0.280019	1.025	(0.874-1.202)	0.757163	0.450179
rs9607761	22	41371418		3881	4329	A	T	0.000426309			(-)	0.121853		NA	(NA-NA)	NA	NA	(NA-NA)	NA	NA
rs4822011	22	41550954	TMED2:DDX55:EIF2B1:GTF2H3:TCTN2	3881	4327	A	G	0.378168		1.029	(0.969-1.092)	0.362357		1.04	(0.969-1.115)	0.271927	0.993	(0.864-1.141)	0.918967	0.574264
rs104664	22	45711854	CCND1:ORAOV1:FGF19	3881	4330	A	G	0.127451		0.9309	(0.851-1.018)	0.106144		0.932	(0.84-1.034)	0.183506	0.929	(0.757-1.139)	0.480248	0.980801

## Sheet: OC risk
Online Resource 5b. Associations with ovarian cancer risk in BRCA1 and BRCA2 mutation carriers
BRCA1 carriers										Ovarian cancer risk				Competing risk
SNP	Chromos	Position	Nearby genes	Nctrl	Ncase	allele1	allele2	MAF		HR	95% CI	p-value		N_Individuals	HR_OC	95% CI OC	p_OC	HR_BC	95% CI BC	p_BC
rs1052576	1	15832543	CASP9	12611	2407	G	A	0.46		0.998	(0.937-1.063)	0.904		15018	1.009	(0.933-1.09)	0.820	0.999	(0.957-1.044)	0.985
rs11102707	1	114493583	AP4B1:DCLRE1B:HIPK1:OLFML3	12777	2461	G	A	0.234151		1.014	(0.940-1.093)	0.657774		15238	1.028	(0.937-1.127)	0.559849	0.9775	(0.927-1.03)	0.3973
rs1136410	1	226555302	PARP1	12789	2462	A	G	0.16		1.037	(0.953-1.128)	0.456		15251	1.05	(0.948-1.164)	0.350	1.05	(0.990-1.114)	0.103
rs11806633	1	227308416	CDC42BPA	12790	2462	A	G	0.0645489		0.898	(0.787-1.025)	0.114784		15252	1.015	(0.864-1.193)	0.854	1.131	(1.038-1.232)	0.00484054
rs11811771	1	114463049	PTPN22:BCL2L15:AP4B1:DCLRE1B:HIPK1	12790	2462	A	G	0.425288			(0.929-1.055)	0.709495		15252	1.018	(0.941-1.1)	0.659	1.028	(0.984-1.073)	0.209183
rs12025623	1	21892479	ALPL:RAP1GAP	12789	2460	G	A	0.363663		1.098	(1.027-1.173)	0.00709251		15249	1.111	(1.023-1.206)	0.012	1.023	(0.977-1.07)	0.323339
rs12058802	1	91923254	CDC7	12788	2462	G	A	0.490623		1.013	(0.951-1.079)	0.758146		15250	0.9939	(0.919-1.074)	0.877407	0.9655	(0.925-1.007)	0.105267
rs12093351	1	114529464	HIPK1:OLFML3	12786	2461	T	A	0.000229553		6.899	(2.544-18.7)	0.0480051		NA	NA	(NA-NA)	NA	NA	(NA-NA)	NA
rs12125947	1	91990487	CDC7	12788	2460	A	G	0.467963		1.013	(0.951-1.079)	0.637674		15248	1.058	(0.978-1.144)	0.159304	1.034	(0.990-1.079)	0.128679
rs13374264	1	46683014	TSPAN1:POMGNT1:C1orf190:RAD54L	12790	2462	G	A	0.000917912		3.465	(1.562-7.684)	0.00495506		15252	2.371	(0.901-6.239)	0.0802792	0.6321	(0.312-1.28)	0.202
rs13447450	1	91965850	CDC7	12790	2461	G	A	0.367845		1.025	(0.960-1.094)	0.407469		15251	1.058	(0.977-1.146)	0.162278	1.002	(0.958-1.048)	0.919108
rs13447454	1	91966406	CDC7	12774	2456	G	A	0.129744		0.975	(0.886-1.074)	0.576538		15230	0.9899	(0.876-1.118)	0.870815	1.059	(0.990-1.132)	0.093811
rs1767429	1	21889340	ALPL:RAP1GAP	12765	2460	A	G	0.417701		1.092	(1.024-1.164)	0.00920069		15225	1.107	(1.023-1.197)	0.011242	1.02	(0.976-1.065)	0.384843
rs2020902	1	15834360	CELA2A:CELA2B:CASP9:DNAJC16	12787	2462	A	G	0.146174		1.046	(0.96-1.14)	0.304546		15249	0.9626	(0.863-1.073)	0.489581	0.9938	(0.936-1.055)	0.838549
rs2028706	1	211831380	NEK2	12790	2462	A	C	0.233412		1.003	(0.931-1.079)	0.998583		15252	1.021	(0.932-1.119)	0.648696	1.012	(0.963-1.064)	0.625305
rs2233025	1	11735652	FBXO2:FBXO44:FBXO6:MAD2L2:C1orf187	12784	2458	G	A	0.176388		1.007	(0.928-1.093)	0.844062		15242	1.055	(0.954-1.167)	0.293659	1.018	(0.963-1.077)	0.521232
rs2336030	1	11736600	FBXO2:FBXO44:FBXO6:MAD2L2:C1orf187	12779	2458	G	A	0.327394		1.009	(0.943-1.079)	0.937597		15237	0.999	(0.918-1.087)	0.981596	0.9742	(0.930-1.02)	0.263196
rs2805053	1	162781787	DDR2:HSD17B7:C1orf110	12766	2458	A	G	0.488111		0.989	(0.929-1.054)	0.806808		15224	0.9878	(0.914-1.068)	0.756724	1.014	(0.971-1.058)	0.52455
rs2911571	1	104108743	SSX2IP	12786	2460	G	A	0.144202		1.028	(0.941-1.123)	0.560412		15246	1.018	(0.912-1.137)	0.744194	1.01	(0.950-1.073)	0.745832
rs4645989	1	15850343	CELA2B:CASP9:DNAJC16:AGMAT	12775	2456	A	G	0.301162		0.962	(0.897-1.033)	0.291417		15231	0.9565	(0.876-1.044)	0.318396	1.008	(0.961-1.056)	0.750775
rs4646091	1	15822043	CTRC:CELA2A:CELA2B:CASP9:DNAJC16	12790	2461	A	G	0.232018		1.033	(0.960-1.112)	0.343847		15251	1.014	(0.926-1.111)	0.757605	0.99	(0.941-1.041)	0.69635
rs471144	1	152454255	LCE5A:CRCT1	12787	2462	A	C	0.0740376		0.97	(0.862-1.091)	0.590928		15249	0.9959	(0.859-1.153)	0.956073	1.072	(0.986-1.166)	0.101763
rs513826	1	38166022	C1orf109:CDCA8:EPHA10	12788	2462	A	G	0.455607		1.009	(0.946-1.076)	0.8613		15250	1.007	(0.929-1.092)	0.859329	0.9795	(0.937-1.023)	0.351025
rs522712	1	91943207	CDC7	12790	2461	A	C	0.372894		0.994	(0.932-1.061)	0.928954		15251	1	(0.923-1.083)	0.997334	0.9982	(0.955-1.043)	0.937102
rs6673329	1	162794500	DDR2:HSD17B7:C1orf110	12730	2453	G	A	0.0210762		NA	(NA-NA)	0.121804		15183	1.093	(0.855-1.396)	0.478272	0.851	(0.728-0.993)	0.0414515
rs6674384	1	114455907	PTPN22:BCL2L15:AP4B1:DCLRE1B:HIPK1	12785	2461	G	A	0.28132		1.019	(0.950-1.093)	0.54554		15246	1.031	(0.946-1.124)	0.479469	0.9803	(0.933-1.029)	0.42268
rs6676779	1	243875486	AKT3	12788	2462	A	G	0.136033		1.015	(0.923-1.115)	0.781001		15250	1.012	(0.900-1.138)	0.836881	1.039	(0.976-1.105)	0.231087
rs686083	1	38149193	RSPO1:C1orf109:CDCA8:EPHA10	12787	2461	G	A	0.268822		1.009	(0.938-1.084)	0.873108		15248	0.9977	(0.912-1.091)	0.959408	1	(0.952-1.049)	0.998554
rs697004	1	211842808	NEK2	12789	2462	C	A	0.316176		0.97	(0.905-1.04)	0.422996		15251	0.9924	(0.910-1.082)	0.861465	0.9853	(0.940-1.032)	0.531621
rs885814	1	21875916	ALPL:RAP1GAP	12789	2462	G	A	0.323684		1.093	(1.022-1.17)	0.0140281		15251	1.092	(1.004-1.187)	0.0408854	1.019	(0.972-1.067)	0.436708
rs9793263	1	46722389	C1orf190:RAD54L:LRRC41:UQCRH	12757	2455	G	A	0.403234		0.976	(0.915-1.042)	0.529376		15212	0.986	(0.910-1.068)	0.728244	0.9734	(0.932-1.017)	0.224494
rs10205923	2	227614557	IRS1	12790	2461	G	A	0.0796997		0.998	(0.893-1.116)	0.929644		15251	0.9741	(0.846-1.12)	0.712925	0.969	(0.894-1.049)	0.43838
rs10490250	2	58509628	FANCL	12790	2462	A	C	0.194958		1.029	(0.952-1.112)	0.468465		15252	1.031	(0.935-1.136)	0.535924	0.9755	(0.924-1.029)	0.366851
rs10495944	2	47703290	MSH2:KCNK12	12790	2462	G	A	0.119361		1.069	(0.972-1.174)	0.149923		15252	1.042	(0.927-1.171)	0.490485	0.9809	(0.919-1.047)	0.561809
rs11674814	2	202153846	ALS2CR12	12783	2459	G	A	0.42		0.980	(0.920-1.044)	0.611		15242	0.936	(0.866-1.012)	0.097	0.965	(0.924-1.008)	0.105
rs11688692	2	202189451	CASP8:ALS2CR12	12787	2462	A	G	0.420028		0.98	(0.920-1.044)	0.606503		15249	0.9363	(0.866-1.012)	0.0981144	0.963	(0.922-1.005)	0.0859036
rs11903456	2	58393836	VRK2:FANCL	12735	2454	G	A	0.212028		1.01	(0.936-1.089)	0.781374		15189	1.007	(0.916-1.105)	0.888918	0.9988	(0.948-1.052)	0.964553
rs12052479	2	173404804	ITGA6:PDK1	12787	2462	C	A	0.216047		0.99	(0.917-1.07)	0.820017		15249	1.001	(0.909-1.102)	0.977648	1.003	(0.952-1.057)	0.902316
rs12464787	2	179440029	MIR548N:TTN	12790	2462	G	A	0.283996		0.985	(0.918-1.057)	0.644992		15252	1.025	(0.940-1.117)	0.581302	1.028	(0.979-1.078)	0.262465
rs12477063	2	215673664	BARD1	12786	2461	A	G	0.390601		0.993	(0.932-1.058)	0.933542		15247	1.013	(0.936-1.097)	0.743685	1.022	(0.978-1.068)	0.329683
rs13001462	2	215678346	BARD1	12788	2461	G	A	0.242016		0.997	(0.928-1.072)	0.977213		15249	0.9671	(0.883-1.058)	0.466354	0.9939	(0.945-1.045)	0.811985
rs1421	2	47613870	EPCAM:MIR559:MSH2	12790	2462	A	G	0.120148		1.069	(0.973-1.173)	0.148251		15252	1.041	(0.926-1.169)	0.503592	0.9933	(0.931-1.06)	0.839323
rs16822647	2	227651123	IRS1:RHBDD1	12790	2461	A	G	0.080421		1.019	(0.910-1.14)	0.79605		15251	1.007	(0.875-1.159)	0.91921	0.9728	(0.898-1.053)	0.495271
rs17702263	2	173459590	PDK1	12788	2462	A	G	0.145443		0.982	(0.898-1.074)	0.706704		15250	0.999	(0.891-1.12)	0.986472	1.05	(0.988-1.116)	0.11175
rs2063018	2	28318008	BRE	12790	2462	A	G	0.29		1.004	(0.937-1.076)	0.891		15252	1.025	(0.939-1.118)	0.581	1.059	(1.01-1.111)	0.016
rs207928	2	217036441	XRCC5	12790	2461	G	A	0.422497		1.005	(0.943-1.071)	0.722354		15251	0.9984	(0.922-1.081)	0.967618	0.9854	(0.943-1.029)	0.504804
rs2305354	2	100019496	EIF5B:REV1	12786	2461	G	A	0.447072		0.995	(0.934-1.06)	0.89912		15247	1.014	(0.938-1.095)	0.723558	1.061	(1.017-1.106)	0.00581725
rs3769823	2	202122995	CASP10:CASP8:ALS2CR12	12789	2462	G	A	0.318274		0.98	(0.916-1.048)	0.525763		15251	1.007	(0.926-1.094)	0.869962	1.087	(1.038-1.138)	3.67x10-4
rs4075604	2	173387668	Intergenic	12789	2462	G	A	0.22		0.990	(0.917-1.07)	0.822		15251	1.002	(0.910-1.103)	0.964	1.004	(0.953-1.058)	0.875
rs4663992	2	234889177	TRPM8	12784	2461	C	A	0.341948		1.017	(0.951-1.087)	0.592491		15245	1.006	(0.926-1.092)	0.888225	0.9842	(0.940-1.029)	0.487226
rs6715570	2	215673440	BARD1	12786	2462	G	A	0.288825		0.989	(0.923-1.059)	0.791615		15248	0.967	(0.887-1.054)	0.445917	1.004	(0.957-1.053)	0.854391
rs6721310	2	28319320	BRE	12786	2461	G	A	0.338722		0.983	(0.920-1.051)	0.59997		15247	0.9972	(0.917-1.084)	0.947183	1.065	(1.017-1.114)	0.0067112
rs6735656	2	202124502	CASP10:CASP8:ALS2CR12	12778	2460	A	C	0.285077		0.974	(0.909-1.044)	0.453113		15238	0.9917	(0.909-1.081)	0.849546	1.081	(1.031-1.133)	0.00134889
rs6757091	2	215672793	BARD1	12789	2462	G	C	0.39		0.992	(0.931-1.057)	0.914		15251	1.014	(0.936-1.097)	0.732	1.024	(0.980-1.07)	0.285
rs726379	2	231685198	CAB39:ITM2C	12786	2462	A	G	0.260034		1.034	(0.961-1.111)	0.365094		15248	1.042	(0.953-1.139)	0.366208	0.9858	(0.938-1.035)	0.565918
rs7609252	2	111419426	RGPD8:BUB1	12790	2462	A	G	0.028193		0.987	(0.810-1.202)	0.845371		15252	0.9792	(0.764-1.254)	0.867412	1.006	(0.885-1.143)	0.929777
rs768298	2	58410972	VRK2:FANCL	12790	2461	G	A	0.298276		1.017	(0.951-1.088)	0.540604		15251	0.9834	(0.905-1.069)	0.692814	0.9727	(0.928-1.019)	0.239009
rs13066757	3	10045030	TMEM111:LOC401052:CIDECP:FANCD2	12788	2460	C	A	0.00403332		0.674	(0.373-1.215)	0.17488		NA	NA	(NA-NA)	NA	NA	(NA-NA)	NA
rs13073141	3	51410485	DOCK3:MANF:RBM15B:VPRBP	12790	2461	A	G	0.347223		1.021	(0.956-1.09)	0.506583		15251	1.015	(0.935-1.1)	0.720624	0.9921	(0.949-1.037)	0.726636
rs13082648	3	142129008	XRN1:ATR	12789	2462	G	A	0.390499		0.999	(0.936-1.065)	0.882019		15251	0.9624	(0.889-1.041)	0.341204	0.9725	(0.931-1.015)	0.20329
rs13099560	3	48204768	CDC25A	12789	2461	A	G	0.288393		0.956	(0.890-1.026)	0.260076		15250	0.9506	(0.871-1.037)	0.252425	0.9869	(0.941-1.034)	0.581489
rs13323290	3	15467029	METTL6:EAF1:COLQ	12788	2461	G	A	0.175323		0.985	(0.907-1.069)	0.761066		15249	0.9084	(0.818-1.008)	0.0711903	0.9576	(0.905-1.013)	0.130436
rs16838754	3	131843104		12788	2462	A	G	0.176426		1.015	(0.934-1.102)	0.777486		15250	0.9832	(0.886-1.09)	0.7471	1.012	(0.957-1.07)	0.669867
rs4103004	3	20042834	RAB5A:C3orf48:KAT2B	12756	2456	G	A	0.451223		0.973	(0.912-1.037)	0.413033		15212	0.9661	(0.893-1.045)	0.386425	0.9918	(0.95-1.035)	0.705886
rs4241370	3	133794199	SLCO2A1	12777	2458	A	C	0.31618		1.018	(0.952-1.089)	0.646337		15235	1.067	(0.981-1.16)	0.128971	1.051	(1.004-1.101)	0.0326536
rs4552343	3	133842112	RYK	12585	2417	A	G	0.0776563		0.96	(0.851-1.082)	0.547734		15002	1.014	(0.874-1.175)	0.857157	1.061	(0.979-1.151)	0.147749
rs6807775	3	65133697		12789	2462	G	A	0.296538		1.049	(0.979-1.123)	0.16962		15251	1.015	(0.932-1.104)	0.734116	0.9919	(0.947-1.038)	0.726539
rs7626117	3	10140671	FANCD2:C3orf24:C3orf10:VHL	12786	2462	G	A	0.423531		1.001	(0.939-1.066)	0.982358		15248	1.01	(0.933-1.092)	0.806691	0.9873	(0.945-1.031)	0.559515
rs7639683	3	133973731	RYK	12674	2443	A	G	0.351227		1.001	(0.937-1.068)	0.92342		15117	1.009	(0.929-1.095)	0.835088	1.029	(0.983-1.077)	0.220598
rs11099601	4	84382763	FAM175A	12788	2460	G	A	0.49		1.039	(0.974-1.107)	0.259		15248	1.015	(0.938-1.099)	0.703	1.002	(0.960-1.045)	0.936
rs11946020	4	103944742	NHEDC1:NHEDC2	12788	2462	A	G	0.346689		0.917	(0.858-0.979)	0.0120796		15250	0.9031	(0.833-0.978)	0.0130531	0.9912	(0.948-1.036)	0.695105
rs1354360	4	70616322	SULT1B1	12770	2460	A	G	0.346783		0.941	(0.880-1.005)	0.069749		15230	0.9016	(0.829-0.979)	0.0145583	0.9889	(0.945-1.034)	0.625818
rs1389999	4	14858341		12788	2461	A	G	0.346023		1.077	(1.009-1.149)	0.0263487		15249	1.027	(0.948-1.112)	0.51387	0.942	(0.900-0.985)	0.0088401
rs1503721	4	70679571	SULT1E1	12790	2462	A	G	0.308124		0.935	(0.871-1.002)	0.0538808		15252	0.8905	(0.816-0.971)	0.00875086	0.9738	(0.929-1.02)	0.263598
rs150895	4	103712589	MANBA:UBE2D3	12787	2462	G	A	0.480195		0.934	(0.876-0.994)	0.0289362		15249	0.9153	(0.846-0.989)	0.0255399	1.008	(0.965-1.051)	0.726682
rs17355027	4	84388915	HELQ:MRPS18C:FAM175A	12788	2462	G	A	0.0996721		0.966	(0.868-1.076)	0.544064		15250	0.8749	(0.766-0.999)	0.0486404	0.9317	(0.867-1.001)	0.0543874
rs223497	4	103653976	MANBA	12785	2461	A	G	0.485078		0.928	(0.871-0.989)	0.018959		15246	0.9112	(0.843-0.984)	0.0191293	0.9882	(0.947-1.031)	0.581495
rs230530	4	103453980	NFKB1	12784	2460	A	G	0.458377		0.983	(0.923-1.046)	0.625843		15244	0.9919	(0.917-1.072)	0.838478	0.9876	(0.946-1.03)	0.560077
rs2788865	4	26446006	RBPJ:CCKAR	12788	2462	A	G	0.387344		0.981	(0.919-1.047)	0.512804		15250	0.9715	(0.896-1.052)	0.478773	1.006	(0.962-1.052)	0.784985
rs2854915	4	1721654	FAM53A:SLBP:TMEM129:TACC3	12702	2444	A	G	0.448006		0.978	(0.917-1.043)	0.453753		15146	0.9644	(0.890-1.044)	0.37265	1.02	(0.977-1.065)	0.362903
rs3774937	4	103434253	NFKB1	12789	2461	A	G	0.322623		1.007	(0.941-1.077)	0.797454		15250	0.9978	(0.917-1.085)	0.959571	1.013	(0.968-1.06)	0.572415
rs4647601	4	185570032	CASP3:CCDC111:MLF1IP	12780	2458	C	A	0.475948		0.976	(0.916-1.041)	0.495098		15238	1.015	(0.937-1.099)	0.714554	0.9728	(0.931-1.016)	0.21368
rs4647610	4	185567931	CASP3:CCDC111:MLF1IP	12789	2462	G	A	0.137532		1.1	(1.006-1.203)	0.0454766		15251	1.137	(1.016-1.271)	0.025228	1.076	(1.011-1.145)	0.0215622
rs6830624	4	104020422	NHEDC2:BDH2:CENPE	12788	2462	A	G	0.283148		1.026	(0.956-1.1)	0.550634		15250	1.021	(0.935-1.113)	0.646614	0.9722	(0.926-1.02)	0.247421
rs7439493	4	110656730	CCDC109B:CASP6:PLA2G12A:CFI	12789	2461	G	A	0.422066		1.041	(0.977-1.109)	0.191561		15250	1.03	(0.952-1.114)	0.455897	0.9956	(0.953-1.04)	0.840706
rs798755	4	1720824	FAM53A:SLBP:TMEM129:TACC3	12784	2459	G	A	0.202618		1.008	(0.932-1.089)	0.856855		15243	1.002	(0.911-1.102)	0.962037	1.022	(0.969-1.078)	0.41259
rs971539	4	84433804	FAM175A:AGPAT9	12759	2456	G	A	0.492836		1.042	(0.977-1.111)	0.211429		15215	1.03	(0.950-1.115)	0.473566	1.008	(0.966-1.052)	0.707129
rs980455	4	103418957	NFKB1	12782	2462	A	G	0.377788		1.019	(0.955-1.088)	0.555865		15244	1.012	(0.933-1.097)	0.768743	1.007	(0.963-1.052)	0.769152
rs9998559	4	15113921	CPEB2	12769	2457	G	C	0.401287		1.023	(0.958-1.092)	0.469003		15226	1.052	(0.969-1.14)	0.224742	0.9982	(0.955-1.043)	0.93477
rs12517451	5	79920073	Intergenic	12789	2462	G	A	0.25		0.997	(0.928-1.072)	0.933		15251	1.03	(0.941-1.127)	0.516	1.055	(1.005-1.108)	0.031
rs12656399	5	56026843		12789	2462	A	G	0.103075		1.026	(0.927-1.136)	0.606591		15251	1.023	(0.902-1.16)	0.723351	1.051	(0.980-1.127)	0.159457
rs13171253	5	43160433	ZNF131:MGC42105	12787	2461	G	A	0.125033		1.072	(0.975-1.177)	0.153945		15248	1.085	(0.964-1.219)	0.173299	0.9808	(0.918-1.048)	0.566322
rs13176284	5	34754248	RAI14	12790	2461	G	A	0.255918		0.963	(0.895-1.036)	0.263063		15251	1.018	(0.931-1.113)	0.69604	1.04	(0.989-1.092)	0.120744
rs1432693	5	147609136	SPINK6:SPINK13	12789	2462	A	G	0.0765524		1.042	(0.928-1.169)	0.461158		15251	1.094	(0.952-1.256)	0.204903	0.9882	(0.912-1.07)	0.768971
rs1650697	5	79950781	DHFR:MTRNR2L2:MSH3	12775	2458	G	A	0.248178		0.99	(0.920-1.064)	0.768946		15233	1.021	(0.933-1.117)	0.646053	1.056	(1.006-1.109)	0.0285259
rs17772583	5	131953510	RAD50:IL13	12789	2462	A	G	0.237591		0.985	(0.914-1.062)	0.631763		15251	0.9628	(0.877-1.057)	0.425114	0.9905	(0.941-1.042)	0.711123
rs2362974	5	36156654	LMBRD2:MIR580:SKP2:C5orf33	12790	2461	A	G	0.125238		0.935	(0.849-1.029)	0.167364		15251	0.9694	(0.859-1.093)	0.6114	1.018	(0.954-1.086)	0.580858
rs2546163	5	76995054	TBCA	12746	2455	A	G	0.313729		0.988	(0.922-1.058)	0.762271		15201	1.002	(0.920-1.09)	0.966159	0.9794	(0.935-1.025)	0.373721
rs2652217	5	76980244	OTP:TBCA	12790	2462	G	A	0.402275		0.952	(0.892-1.015)	0.154259		15252	0.9573	(0.884-1.036)	0.281403	0.9632	(0.922-1.006)	0.0907657
rs2706369	5	131932203	RAD50	12763	2457	C	A	0.00476347		0.933	(0.619-1.407)	0.719269		15220	0.9603	(0.591-1.56)	0.870124	1.006	(0.762-1.326)	0.968255
rs29635	5	47249294		12764	2458	A	G	0.266654		0.979	(0.912-1.052)	0.629409		15222	0.9903	(0.906-1.081)	0.827984	1.022	(0.974-1.072)	0.37316
rs359445	5	173285204	CPEB4	12783	2461	A	G	0.16413		0.978	(0.897-1.066)	0.741993		15244	1.023	(0.919-1.139)	0.67589	0.9882	(0.93-1.05)	0.701642
rs3797306	5	43127925	ZNF131	12790	2462	A	G	0.125098		1.081	(0.983-1.187)	0.109		15252	1.093	(0.972-1.229)	0.135911	0.98	(0.917-1.047)	0.549261
rs425463	5	79901952	ANKRD34B:DHFR:MTRNR2L2:MSH3	12734	2451	G	A	0.340171		1.012	(0.947-1.081)	0.743189		15185	1.007	(0.927-1.093)	0.869183	1.061	(1.014-1.11)	0.0100115
rs4302608	5	170840504	MIR3912:NPM1:FGF18	12789	2461	G	A	0.434262		0.994	(0.932-1.059)	0.837273		15250	1.009	(0.932-1.093)	0.815986	1.043	(0.999-1.088)	0.0536152
rs6151599	5	79951032	DHFR:MTRNR2L2:MSH3	12770	2455	A	G	0.0813465		1.068	(0.955-1.194)	0.285876		15225	0.9747	(0.845-1.124)	0.725154	1.079	(0.996-1.169)	0.0596104
rs6453340	5	76962274	OTP:TBCA	12790	2462	C	A	0.0749082		0.879	(0.778-0.993)	0.0442566		15252	0.8598	(0.740-0.998)	0.0471763	0.949	(0.876-1.027)	0.195209
rs7702272	5	36160854	LMBRD2:MIR580:SKP2:C5orf33	12732	2450	G	A	0.0595442		0.896	(0.783-1.025)	0.144305		15182	0.915	(0.774-1.08)	0.294743	0.9846	(0.899-1.078)	0.737725
rs7707008	5	170801952	MIR3912:NPM1:FGF18	12790	2462	G	A	0.169912		0.98	(0.902-1.065)	0.75088		15252	0.9688	(0.874-1.073)	0.543059	0.981	(0.926-1.039)	0.513064
rs7722173	5	176384683	UIMC1	12788	2462	A	G	0.05		0.938	(0.817-1.077)	0.345		15250	1.031	(0.868-1.226)	0.725	1.053	(0.958-1.158)	0.282
rs1077394	6	31610384	NCR3:AIF1:PRRC2A:SNORA38:BAG6:APOM:C6orf47:GPANK1:CSNK2B:LY6G5B:LY6G5C:ABHD16A	12790	2462	A	G	0.305239		0.991	(0.925-1.062)	0.740156		15252	0.9748	(0.896-1.06)	0.553091	0.9741	(0.930-1.02)	0.265024
rs1144708	6	31710020	ABHD16A:LY6G6F:LY6G6E:LY6G6D:LY6G6C:C6orf25:DDAH2:CLIC1:MSH5:C6orf26:C6orf27:VARS	12782	2461	G	A	0.351735		1.039	(0.974-1.109)	0.265512		15243	1.027	(0.946-1.113)	0.525373	1.049	(1.004-1.097)	0.0332007
rs12208908	6	109048366	FOXO3:NCRNA00222	12789	2461	G	A	0.213115		0.996	(0.922-1.076)	0.873388		15250	0.9865	(0.896-1.085)	0.780535	0.9982	(0.947-1.052)	0.945979
rs1268166	6	109008232	FOXO3	12789	2462	A	G	0.351682		0.979	(0.917-1.046)	0.601549		15251	0.9505	(0.875-1.031)	0.223173	0.9651	(0.923-1.009)	0.115893
rs13210247	6	111922720	LOC643749:TRAF3IP2	12782	2461	A	G	0.0713442		0.98	(0.866-1.108)	0.713293		15243	0.8682	(0.742-1.016)	0.0774608	1.021	(0.940-1.109)	0.618432
rs1480380	6	32913246	LOC100294145:HLA-DMB:HLA-DMA:BRD2	12790	2462	G	A	0.0735969		1.178	(1.041-1.333)	0.00867346		15252	1.213	(1.039-1.416)	0.0142931	1.027	(0.943-1.117)	0.539047
rs17254634	6	80751942	TTK	12778	2459	G	A	0.181827		1.027	(0.947-1.114)	0.566572		15237	1.008	(0.911-1.115)	0.880784	1.009	(0.955-1.066)	0.737681
rs206776	6	32953711	HLA-DMB:HLA-DMA:BRD2:HLA-DOA	12782	2461	G	A	0.318868		1.013	(0.946-1.083)	0.723598		15243	0.9818	(0.902-1.068)	0.666918	1.033	(0.986-1.082)	0.170901
rs210170	6	33525680	BAK1:GGNBP1:C6orf227	12782	2460	G	A	0.347002		1.008	(0.942-1.077)	0.854635		15242	1.002	(0.923-1.088)	0.952405	1.005	(0.960-1.052)	0.831699
rs2179070	6	111885752	LOC643749:TRAF3IP2	12790	2462	A	G	0.06845		1.003	(0.884-1.137)	0.994303		15252	0.9189	(0.783-1.078)	0.298224	1.009	(0.927-1.097)	0.835736
rs2269058	6	37324857	TBC1D22B:RNF8	12787	2462	A	C	0.494393		0.994	(0.933-1.059)	0.875403		15249	1.025	(0.947-1.108)	0.541518	0.9974	(0.955-1.041)	0.903753
rs2280152	6	112375889	WISP3:TUBE1:C6orf225	12778	2459	A	G	0.273217		1	(0.929-1.076)	0.932478		15237	1.045	(0.955-1.142)	0.334971	1.005	(0.958-1.054)	0.829489
rs2284923	6	37348920	TBC1D22B:RNF8	12789	2462	G	A	0.464822		0.971	(0.911-1.034)	0.387286		15251	0.9441	(0.872-1.022)	0.153714	1.004	(0.962-1.048)	0.848471
rs3130000	6	30628082	PPP1R10:MRPS18B:ATAT1:C6orf136:DHX16:KIAA1949:NRM:MDC1	12786	2461	G	A	0.0771299		0.94	(0.832-1.062)	0.36593		15247	0.8799	(0.757-1.022)	0.0945605	0.9449	(0.874-1.021)	0.152331
rs3176326	6	36647289	CDKN1A	12783	2462	G	A	0.216268		1.037	(0.959-1.121)	0.326931		15245	1.03	(0.936-1.134)	0.54027	1.016	(0.964-1.07)	0.549192
rs3777947	6	112433664	WISP3:TUBE1:C6orf225:LAMA4	12788	2459	A	G	0.271693		1.009	(0.938-1.086)	0.855315		15247	1.054	(0.964-1.152)	0.242399	0.9994	(0.953-1.048)	0.97912
rs396746	6	33557045	BAK1:GGNBP1:C6orf227:ITPR3	12768	2459	C	A	0.125468		0.937	(0.852-1.03)	0.19353		15227	0.9456	(0.840-1.064)	0.351291	0.9882	(0.926-1.054)	0.718277
rs465969	6	111655530	REV3L	12743	2453	G	A	0.0901882		0.9698	(0.869-1.082)	0.565632		15196	0.9122	(0.793-1.049)	0.196176	0.9924	(0.921-1.069)	0.840466
rs4710127	6	167276041	RPS6KA2	12723	2444	G	A	0.181974		1.061	(0.978-1.15)	0.154654		15167	1.041	(0.942-1.151)	0.427351	0.9579	(0.905-1.013)	0.130973
rs726230	6	11200574	NEDD9	12789	2461	A	C	0.203508		1.021	(0.943-1.104)	0.550296		15250	1.01	(0.916-1.113)	0.844498	0.9856	(0.935-1.038)	0.584596
rs733590	6	36645203	CDKN1A	12785	2461	A	G	0.38925		1.001	(0.938-1.067)	0.882386		15246	1.001	(0.924-1.085)	0.971485	1.021	(0.977-1.067)	0.350412
rs809193	6	112020414	FYN	12790	2462	A	G	0.222168		0.997	(0.923-1.075)	0.935994		15252	1.05	(0.955-1.152)	0.310224	1.018	(0.966-1.073)	0.505109
rs9296095	6	33542523	BAK1:GGNBP1:C6orf227:ITPR3	12784	2460	A	G	0.213855		1.051	(0.975-1.132)	0.192478		15244	1.098	(1.001-1.204)	0.048132	1.06	(1.007-1.117)	0.0267177
rs9386747	6	109038738	FOXO3:NCRNA00222	12789	2459	A	G	0.112769		0.992	(0.897-1.096)	0.836313		15248	0.9966	(0.881-1.126)	0.955838	0.9911	(0.925-1.061)	0.796079
rs9457245	6	167340715	RNASET2	12789	2462	G	A	0.0773392		1.012	(0.901-1.135)	0.712199		15251	0.9789	(0.852-1.125)	0.763824	0.9192	(0.848-0.997)	0.0405013
rs9468322	6	28231243	LOC222699:ZNF193:ZKSCAN4:NKAPL:ZNF187:PGBD1	12788	2462	G	A	0.0451148		1.017	(0.876-1.181)	0.836377		15250	1.033	(0.855-1.247)	0.735642	1.029	(0.926-1.144)	0.59136
rs10241838	7	96343665	SHFM1	12760	2458	A	G	0.340156		0.936	(0.874-1.001)	0.0517496		15218	0.9317	(0.856-1.014)	0.0994831	0.9884	(0.943-1.035)	0.620272
rs12666800	7	45906594	IGFBP1:IGFBP3	12778	2459	G	A	0.115771		1.008	(0.913-1.112)	0.997206		15237	0.9891	(0.876-1.116)	0.85838	0.9545	(0.893-1.019)	0.163989
rs6968090	7	96318575	SHFM1	12685	2444	A	G	0.209829		1.02	(0.943-1.102)	0.684263		15129	0.9844	(0.894-1.083)	0.747666	0.973	(0.922-1.026)	0.315217
rs7804722	7	92288106	CDK6	12787	2462	A	G	0.303102		1.002	(0.934-1.074)	0.953851		15249	1.033	(0.946-1.126)	0.468401	1.025	(0.977-1.075)	0.303293
rs10104637	8	95393925	RAD54B	12790	2462	A	G	0.0431747		1.022	(0.876-1.193)	0.721012		15252	0.9439	(0.773-1.151)	0.568831	1.007	(0.905-1.12)	0.901399
rs1011683	8	91020834	NBN:DECR1	12788	2462	A	C	0.325705		1.058	(0.990-1.131)	0.0953757		15250	1.039	(0.956-1.13)	0.365256	1.009	(0.964-1.056)	0.698816
rs11574158	8	30891353	PURG:WRN	12788	2462	G	A	0.0316721		1.097	(0.924-1.301)	0.331919		15250	1.026	(0.826-1.273)	0.817176	0.9248	(0.817-1.047)	0.215711
rs11574398	8	31025343	WRN	12789	2461	G	A	0.360426		1.025	(0.959-1.094)	0.57862		15250	1.073	(0.989-1.163)	0.0901149	1.025	(0.980-1.071)	0.272259
rs13279327	8	48442384	KIAA0146	12787	2462	A	G	0.309266		0.985	(0.920-1.054)	0.615159		15249	0.9682	(0.889-1.055)	0.459098	0.9886	(0.944-1.035)	0.625779
rs2445614	8	128212594		12789	2462	G	A	0.246902		0.949	(0.881-1.023)	0.163305		15251	0.9453	(0.862-1.036)	0.231017	1.025	(0.974-1.077)	0.335148
rs2450551	8	95351843	RAD54B	12782	2459	C	A	0.0455023		1.076	(0.925-1.251)	0.337923		15241	0.9585	(0.792-1.159)	0.661978	0.8973	(0.806-0.999)	0.0473361
rs6982040	8	48708742	PRKDC	12778	2457	G	A	0.00380702		NA	(NA-NA)	0.727494		15235	0.9589	(0.527-1.744)	0.890626	1.054	(0.775-1.433)	0.736069
rs1056171	9	133761001	ABL1:QRFP:FIBCD1	12764	2456	A	G	0.25956		1.001	(0.931-1.076)	0.918961		15220	0.9487	(0.866-1.039)	0.254729	0.9615	(0.915-1.01)	0.118648
rs10972278	9	35000289	KIAA1045:DNAJB5:C9orf131	12787	2462	A	G	0.379074		1.034	(0.970-1.102)	0.381145		15249	1.018	(0.940-1.102)	0.655716	0.9964	(0.953-1.041)	0.870994
rs11535662	9	140143801	TPRN:TMEM203:NDOR1:RNF208:C9orf169:LOC643596:SLC34A3:TUBB2C:FAM166A:C9orf173:COBRA1:C9orf167	12788	2462	G	A	0.457016		1.02	(0.958-1.086)	0.510464		15250	0.9836	(0.909-1.064)	0.681637	0.9653	(0.924-1.008)	0.106764
rs12004745	9	21812349	MTAP	12790	2462	T	A	0.05		1.102	(0.958-1.267)	0.122		15252	1.13	(0.950-1.343)	0.166	1.026	(0.929-1.133)	0.611
rs16923815	9	100480357	NCBP1:XPA	12789	2462	G	A	0.129434		1.014	(0.922-1.114)	0.792037		15251	1.002	(0.889-1.128)	0.977325	1.046	(0.981-1.114)	0.170982
rs2039971	9	21815166	MTAP	12762	2449	C	A	0.48054		0.992	(0.931-1.056)	0.802779		15211	0.9586	(0.887-1.036)	0.2855	0.9858	(0.945-1.028)	0.507585
rs2069422	9	22008026	C9orf53:CDKN2A:CDKN2B-AS1:CDKN2B	12790	2460	A	C	0.298033		0.97	(0.905-1.04)	0.455334		15250	0.9761	(0.895-1.064)	0.582284	1.02	(0.972-1.07)	0.40986
rs28631372	9	43656535	TMEM203:NDOR1:RNF208:C9orf169:LOC643596:SLC34A3:TUBB2C:FAM166A:C9orf173:COBRA1:C9orf167:NRARP	12786	2461	G	A	0.0682429		1.078	(0.952-1.22)	0.193789		15247	1.018	(0.872-1.188)	0.816602	0.9873	(0.905-1.076)	0.77105
rs4877005	9	92325852	LOC100129066	12790	2462	A	G	0.300879		0.96	(0.896-1.028)	0.224908		15252	0.9726	(0.892-1.06)	0.527518	1.024	(0.976-1.073)	0.327449
rs595429	9	35055669	C9orf131:VCP:FANCG:PIGO:STOML2:KIAA1539	12782	2460	G	A	0.0508135		1.104	(0.958-1.272)	0.121691		15242	1.11	(0.930-1.323)	0.246012	1.032	(0.933-1.141)	0.537195
rs6597642	9	133725767	ABL1:QRFP	12783	2460	G	A	0.111264		0.967	(0.873-1.071)	0.538311		15243	0.9699	(0.850-1.106)	0.649058	1.039	(0.968-1.114)	0.284497
rs10764686	10	27475494	YME1L1:MASTL:ACBD5	12325	2374	G	A	0.353357		0.935	(0.875-0.999)	0.0444087		14699	0.9205	(0.848-0.999)	0.0481214	1.001	(0.956-1.047)	0.967825
rs1127687	10	115490109	CASP7:C10orf81	12780	2462	G	A	0.228087		1.001	(0.927-1.081)	0.876349		15242	0.9834	(0.893-1.082)	0.731431	0.9864	(0.937-1.038)	0.598501
rs11574852	10	104161475	GBF1:NFKB2:PSD:FBXL15:CUEDC2:MIR146B:C10orf95	12609	2417	A	C	0.0349062		1.046	(0.884-1.238)	0.6614		15026	0.9341	(0.757-1.153)	0.524925	0.8949	(0.792-1.01)	0.073097
rs12255933	10	126579158		12789	2462	C	A	0.189004		0.949	(0.876-1.029)	0.162644		15251	0.9371	(0.847-1.036)	0.205083	1.037	(0.982-1.094)	0.184418
rs12411618	10	94052164	CPEB3:MARCH5	12788	2460	G	A	0.139067		0.951	(0.868-1.041)	0.277082		15248	0.9571	(0.855-1.07)	0.442461	1.017	(0.957-1.081)	0.575589
rs1904415	10	62540453	CDK1	12676	2439	A	C	0.241747		1.066	(0.99-1.148)	0.093387		15115	1.119	(1.022-1.226)	0.0151848	1.032	(0.982-1.085)	0.209558
rs1937881	10	5066511	AKR1C1:AKR1C2	12790	2462	G	A	0.18296		0.977	(0.899-1.06)	0.608371		15252	0.9593	(0.867-1.061)	0.420077	0.9699	(0.917-1.025)	0.277419
rs2227309	10	115489167	CASP7	12769	2455	G	A	0.251		0.991	(0.920-1.066)	0.763		15224	0.964	(0.880-1.056)	0.429	0.995	(0.946-1.046)	0.841
rs2419851	10	115380608	HABP2:NRAP	12790	2462	C	A	0.115821		1.032	(0.936-1.137)	0.465524		15252	0.9904	(0.875-1.12)	0.877761	0.9793	(0.915-1.048)	0.543131
rs4147155	10	104536771	SFXN2:C10orf26	12789	2462	G	A	0.143007		0.975	(0.892-1.065)	0.525333		15251	0.9755	(0.874-1.089)	0.657621	1.015	(0.955-1.079)	0.619307
rs4353229	10	115489589	CASP7:C10orf81	12743	2457	A	G	0.255066		0.988	(0.917-1.063)	0.698873		15200	0.9602	(0.876-1.051)	0.380601	0.994	(0.945-1.045)	0.810663
rs6584354	10	102007714	CHUK:CWF19L1:SNORA12:BLOC1S2:PKD2L1	12741	2456	A	C	0.485458		0.982	(0.923-1.045)	0.543435		15197	0.9789	(0.906-1.057)	0.587853	0.9785	(0.937-1.021)	0.318464
rs788209	10	27434716	ANKRD26:YME1L1:MASTL:ACBD5	12754	2455	A	C	0.145835		0.879	(0.804-0.961)	0.00456099		15209	0.9001	(0.804-1.007)	0.0661027	1.001	(0.941-1.064)	0.97491
rs10765682	11	94198269	MRE11A:ANKRD49:LOC643037	12790	2462	A	G	0.100347		0.948	(0.851-1.055)	0.334919		15252	0.9601	(0.839-1.098)	0.551781	1.023	(0.953-1.098)	0.531026
rs10838158	11	43752522	HSD17B12	12770	2453	A	G	0.309827		0.978	(0.912-1.048)	0.58959		15223	0.9851	(0.904-1.073)	0.730742	0.9959	(0.950-1.043)	0.861679
rs11606458	11	6623918	DNHD1:RRP8:ILK:TAF10:TPP1:DCHS1	12790	2462	G	A	0.247148		1.002	(0.933-1.076)	0.923017		15252	0.9956	(0.912-1.087)	0.922037	0.9958	(0.948-1.045)	0.865904
rs12271212	11	77197817	PAK1	12790	2462	G	A	0.230691		1.024	(0.950-1.103)	0.466062		15252	1.075	(0.978-1.181)	0.133898	0.9982	(0.947-1.051)	0.944245
rs17140162	11	125490616	EI24:STT3A:CHEK1	12790	2462	C	A	0.000721217		0.979	(0.324-2.955)	0.973395		15252	0.5926	(0.128-2.725)	0.501481	0.8566	(0.470-1.561)	0.61321
rs183459	11	108089197	NPAT:ATM	12776	2460	A	C	0.408047		0.971	(0.910-1.035)	0.417071		15236	0.9724	(0.898-1.053)	0.489303	1.053	(1.009-1.099)	0.0177112
rs2255538	11	6629042	DNHD1:RRP8:ILK:TAF10:TPP1:DCHS1	12769	2459	G	A	0.260376		1.031	(0.960-1.106)	0.510289		15228	1.028	(0.942-1.122)	0.528857	0.9965	(0.95-1.045)	0.887059
rs2279238	11	47282024	DDB2:ACP2:NR1H3:MADD	12790	2461	G	A	0.145958		1.049	(0.958-1.148)	0.256089		15251	1.048	(0.938-1.17)	0.408487	0.9788	(0.921-1.04)	0.48796
rs228592	11	108123189	NPAT:ATM	12781	2460	A	C	0.417755		0.972	(0.911-1.037)	0.459099		15241	0.9778	(0.903-1.058)	0.579303	1.055	(1.011-1.101)	0.0141593
rs2957873	11	85156821	PACSIN3:DDB2:ACP2:NR1H3:MADD	12790	2461	A	G	0.182152		1.057	(0.972-1.149)	0.15107		15251	1.044	(0.943-1.156)	0.404506	0.9722	(0.919-1.028)	0.321477
rs3212907	11	69468776	CCND1:ORAOV1:FGF19	12789	2460	G	A	0.0375107		0.95	(0.797-1.13)	0.632337		15249	1.024	(0.828-1.266)	0.825815	1.018	(0.908-1.141)	0.757405
rs326222	11	47259668	DDB2:ACP2:NR1H3:MADD	12790	2461	G	A	0.277195		1.051	(0.979-1.128)	0.127892		15251	1.052	(0.964-1.148)	0.252299	0.9978	(0.952-1.046)	0.927727
rs4244812	11	65480768	KAT5:RNASEH2C	12780	2460	A	G	0.481594		1.03	(0.967-1.097)	0.400252		15240	1.024	(0.947-1.107)	0.550318	1.001	(0.959-1.045)	0.960774
rs4435030	11	74806005	Intergenic	12787	2461	C	A	0.38		0.989	(0.926-1.057)	0.778		15248	1.005	(0.926-1.091)	0.900	1.032	(0.988-1.078)	0.149
rs4647709	11	47237359	ARFGAP2:PACSIN3:DDB2:ACP2:NR1H3	12788	2462	G	A	0.0881311		0.965	(0.862-1.079)	0.561237		15250	0.9751	(0.849-1.12)	0.720398	1.064	(0.987-1.147)	0.102151
rs511484	11	100918433	PGR	12779	2459	G	C	0.250328		1.028	(0.956-1.103)	0.475475		15238	1.034	(0.949-1.126)	0.439297	0.9698	(0.923-1.019)	0.220318
rs656040	11	65621057	SNX32:CFL1:MUS81:EFEMP2:CTSW:FIBP:CCDC85B:FOSL1	12785	2461	G	A	0.331825		0.951	(0.888-1.017)	0.112127		15246	0.9454	(0.869-1.028)	0.188267	1.006	(0.961-1.052)	0.800048
rs6589007	11	108040104	ACAT1:NPAT	12787	2461	G	A	0.415005		0.9733	(0.912-1.038)	0.47817		15248	0.9814	(0.906-1.063)	0.643851	1.057	(1.012-1.103)	0.0114876
rs6592537	11	70172975	PPFIA1:MIR548K	12788	2462	G	A	0.11482		1.021	(0.924-1.127)	0.71891		15250	0.9997	(0.885-1.129)	0.996408	0.9889	(0.927-1.055)	0.734548
rs660442	11	64042997	TRPT1:NUDT22:DNAJC4:VEGFB:FKBP2:PPP1R14B:PLCB3:BAD:GPR137:KCNK4:C11orf20:ESRRA:TRMT112:PRDX5	12780	2461	G	A	0.209238		0.994	(0.920-1.073)	0.859845		15241	0.9791	(0.890-1.076)	0.661934	0.9756	(0.925-1.028)	0.355409
rs7110437	11	43780553	HSD17B12	12789	2462	A	C	0.309291		0.983	(0.917-1.053)	0.688516		15251	0.9916	(0.910-1.08)	0.845927	0.9967	(0.951-1.044)	0.889382
rs7118659	11	43817125	HSD17B12	12787	2461	A	G	0.312992		0.979	(0.914-1.049)	0.610178		15248	0.984	(0.904-1.071)	0.70981	0.9965	(0.951-1.043)	0.881422
rs7131110	11	43846850	HSD17B12	12789	2462	G	A	0.31		0.982	(0.916-1.052)	0.668		15251	0.987	(0.906-1.075)	0.768	0.995	(0.951-1.043)	0.856
rs7928685	11	6773439	GVINP1:OR2AG2:OR2AG1:OR6A2	12790	2462	A	G	0.164929		0.922	(0.844-1.007)	0.0744756		15252	0.8769	(0.786-0.978)	0.018	0.9981	(0.941-1.058)	0.948214
rs9667035	11	1907653	LSP1	12727	2442	A	G	0.32		0.973	(0.910-1.042)	0.488		15169	0.978	(0.899-1.063)	0.596	1.003	(0.957-1.05)	0.913
rs10160981	12	110904075	ARPC3:GPN3:C12orf24:VPS29:RAD9B	12790	2462	G	A	0.19581		1.004	(0.927-1.086)	0.931484		15252	0.9983	(0.905-1.1)	0.973	1.001	(0.948-1.056)	0.977114
rs10842893	12	27422886	STK38L	12772	2458	G	A	0.0990151		1.031	(0.927-1.147)	0.453348		15230	0.9432	(0.825-1.078)	0.389483	0.9485	(0.881-1.021)	0.159725
rs10846535	12	124130388	TMED2:DDX55:EIF2B1:GTF2H3:TCTN2	12786	2462	A	G	0.431499		0.955	(0.896-1.017)	0.17686		15248	0.9437	(0.871-1.022)	0.152358	0.9774	(0.936-1.02)	0.296695
rs10876864	12	56401085	SILV:CDK2:RAB5B:SUOX:IKZF4:RPS26	12772	2457	A	G	0.404885		0.965	(0.905-1.029)	0.322316		15229	0.9318	(0.860-1.009)	0.0824939	0.9928	(0.949-1.038)	0.749893
rs11060333	12	122678607	MLXIP:LRRC43:IL31:B3GNT4:DIABLO:VPS33A	12785	2460	A	G	0.246277		0.986	(0.916-1.061)	0.759356		15245	0.9422	(0.860-1.031)	0.19685	0.9715	(0.925-1.02)	0.247604
rs12368451	12	99115661	APAF1:ANKS1B	12458	2390	A	G	0.448815		1.006	(0.943-1.073)	0.794838		14848	0.9867	(0.910-1.069)	0.743459	0.9844	(0.941-1.029)	0.489113
rs1291351	12	13084082	CDKN1B	12789	2462	C	G	0.03		1.103	(0.906-1.341)	0.379		15251	0.945	(0.736-1.213)	0.655	0.926	(0.81-1.06)	0.268
rs1502337	12	111062852	PPTC7:TCTN1:HVCN1	12787	2462	G	A	0.335661		1.006	(0.941-1.076)	0.868285		15249	1.023	(0.940-1.112)	0.596694	1.041	(0.994-1.089)	0.0857963
rs17497606	12	27494449	STK38L:ARNTL2	12777	2457	G	A	0.214947		1.057	(0.981-1.139)	0.172778		15234	1.095	(0.997-1.203)	0.0570004	1.004	(0.952-1.058)	0.894591
rs203343	12	120233601	CIT	12787	2460	A	G	0.183413		0.964	(0.888-1.045)	0.388693		15247	0.9798	(0.887-1.082)	0.686365	0.9849	(0.931-1.042)	0.594806
rs2066827	12	12871099	GPR19:CDKN1B:APOLD1:MIR613	12776	2460	A	C	0.24534		1.005	(0.935-1.081)	0.901001		15236	1.032	(0.944-1.128)	0.481717	0.9996	(0.951-1.05)	0.986621
rs2069502	12	58144665	OS9:AGAP2:LOC100130776:TSPAN31:CDK4:MARCH9:CYP27B1:METTL1:FAM119B:TSFM:AVIL	12787	2461	G	A	0.312336		0.978	(0.914-1.046)	0.577901		15248	0.9853	(0.906-1.071)	0.728643	0.999	(0.953-1.047)	0.966455
rs2162679	12	102871259	IGF1	12790	2462	A	G	0.164437		0.997	(0.915-1.085)	0.862797		15252	1.021	(0.919-1.133)	0.698655	1.049	(0.991-1.111)	0.0986076
rs3850952	12	124090802	TMED2:DDX55:EIF2B1:GTF2H3	12774	2456	C	A	0.295043		0.962	(0.897-1.031)	0.25837		15230	0.9775	(0.896-1.066)	0.607994	1.008	(0.962-1.057)	0.728653
rs6490269	12	120207175	CIT	12760	2458	G	A	0.502858		0.988	(0.927-1.051)	0.655622		15218	1.007	(0.932-1.087)	0.85953	1.016	(0.974-1.06)	0.454245
rs703842	12	58162739	CYP27B1/METTL1	12727	2442	A	G	0.32		0.974	(0.910-1.042)	0.488		15169	0.978	(0.899-1.063)	0.596	1.003	(0.957-1.05)	0.913
rs708170	12	27237085	C12orf71	12770	2458	G	A	0.309758		0.984	(0.919-1.053)	0.700178		15228	0.9739	(0.895-1.059)	0.535095	0.9599	(0.916-1.005)	0.0817471
rs7967755	12	986004	WNK1:RAD52	12789	2462	A	G	0.156613		1.045	(0.964-1.133)	0.261589		15251	1.033	(0.934-1.141)	0.528185	0.9322	(0.879-0.989)	0.019002
rs904654	12	120189888	CIT:MIR1178	12788	2461	G	A	0.482851		1.001	(0.940-1.066)	0.951116		15249	1.025	(0.949-1.106)	0.532892	1.016	(0.974-1.059)	0.457421
rs922275	12	27402709	STK38L	12790	2462	G	A	0.363821		0.992	(0.929-1.059)	0.713906		15252	0.9943	(0.915-1.08)	0.892303	1.01	(0.965-1.056)	0.665157
rs11164141	13	114259570	TFDP1:ATP4B	12784	2458	A	G	0.376066		0.994	(0.931-1.061)	0.867261		15242	1.03	(0.950-1.117)	0.466614	0.9814	(0.940-1.025)	0.393737
rs12870278	13	103543243	BIVM:ERCC5:LOC121952	12790	2461	G	A	0.277785		0.968	(0.902-1.038)	0.312421		15251	0.9758	(0.894-1.064)	0.578278	0.9945	(0.949-1.042)	0.818571
rs1408047	13	103484918	KDELC1:BIVM:ERCC5:LOC121952	12785	2462	A	G	0.180035		1.031	(0.951-1.117)	0.452964		15247	1.072	(0.971-1.184)	0.164783	1.043	(0.986-1.104)	0.14117
rs1887894	13	21607600	LATS2	12788	2462	G	A	0.25		0.968	(0.900-1.041)	0.344		15250	0.967	(0.884-1.057)	0.454	0.988	(0.941-1.037)	0.628
rs4119478	13	73254212	MIR548I4:MZT1:C13orf34	12784	2461	G	A	0.3755		0.986	(0.923-1.052)	0.672929		15245	1.019	(0.940-1.105)	0.640938	0.9847	(0.943-1.028)	0.4835
rs4150792	13	114288971	TFDP1:ATP4B:GRK1	12704	2446	G	A	0.303333		0.971	(0.906-1.041)	0.379586		15150	0.9711	(0.891-1.058)	0.501737	1.024	(0.977-1.073)	0.318966
rs7328482	13	21877418		12789	2462	A	C	0.190315		1.011	(0.933-1.094)	0.795722		15251	1.073	(0.975-1.181)	0.14542	0.9971	(0.944-1.052)	0.915465
rs9509492	13	21608971	LATS2	12790	2462	G	A	0.311336		1	(0.933-1.07)	0.983274		15252	1.01	(0.928-1.098)	0.821025	0.9664	(0.922-1.012)	0.146947
rs12880109	14	68813032	RAD51L1	12787	2462	A	G	0.390124		0.993	(0.931-1.058)	0.962268		15249	0.9703	(0.897-1.049)	0.450856	0.9966	(0.954-1.04)	0.878205
rs17105760	14	68984500	RAD51L1	12790	2462	A	G	0.00222922		0.815	(0.382-1.737)	0.574903		15252	1.57	(0.661-3.726)	0.306687	1.094	(0.686-1.743)	0.706822
rs17106237	14	69203145		12790	2462	G	A	0.122804		1.101	(1.001-1.212)	0.0378641		15252	1.206	(1.076-1.351)	0.00125016	1.008	(0.945-1.075)	0.797816
rs2896489	14	140148051	KLC1	12788	2462	G	A	0.30741		1.035	(0.966-1.109)	0.319737		15250	1.053	(0.967-1.146)	0.234594	1.003	(0.957-1.051)	0.897916
rs3020445	14	64788644	ESR2:TEX21P	12789	2462	G	A	0.422235		1.033	(0.969-1.099)	0.359536		15251	1.059	(0.979-1.145)	0.148213	1.019	(0.975-1.064)	0.399912
rs4983559	14	105277209	AKT1:ZBTB42:MGC23270	12779	2455	A	G	0.394086		1.025	(0.960-1.093)	0.484965		15234	1.034	(0.954-1.121)	0.413638	0.9804	(0.938-1.024)	0.371456
rs861537	14	104167075	KLC1:XRCC3:ZFYVE21:PPP1R13B	12712	2435	A	G	0.308378		1.044	(0.975-1.118)	0.220511		15147	1.058	(0.972-1.152)	0.188004	1.001	(0.955-1.048)	0.976504
rs12592524	15	41003463	CASC5:RAD51:FAM82A2	12789	2461	A	G	0.417082		1.033	(0.970-1.101)	0.322511		15250	1.022	(0.944-1.107)	0.588624	1.034	(0.990-1.08)	0.129421
rs12902785	15	66928241		12789	2462	A	G	0.321585		1.02	(0.952-1.092)	0.551215		15251	1.008	(0.925-1.097)	0.862109	1.019	(0.974-1.067)	0.405874
rs1565866	15	40455894	BUB1B	12790	2462	C	A	0.455252		1.008	(0.947-1.072)	0.891186		15252	1.007	(0.932-1.088)	0.851412	1.029	(0.986-1.073)	0.189413
rs2118612	15	67400490	SMAD3	12783	2460	A	G	0.21		1.025	(0.951-1.105)	0.556		15243	1.047	(0.955-1.147)	0.324	0.970	(0.921-1.022)	0.257
rs4779041	15	83337059	LOC440300:CPEB1:AP3B2:LOC338963	12790	2460	G	A	0.353705		0.999	(0.934-1.068)	0.998346		15250	0.98	(0.902-1.064)	0.631802	1.006	(0.961-1.051)	0.803888
rs570933	15	43824030	TP53BP1:MAP1A:PPIP5K1	12789	2462	A	G	0.311816		1.011	(0.944-1.083)	0.626444		15251	0.9675	(0.887-1.055)	0.453237	0.9556	(0.911-1.002)	0.0587675
rs6494633	15	67423306	SMAD3	12787	2462	G	A	0.424815		0.983	(0.922-1.047)	0.561996		15249	0.9727	(0.899-1.052)	0.490457	0.9772	(0.935-1.021)	0.300722
rs7165509	15	40945900	CASC5:RAD51	12790	2461	A	G	0.431742		1.026	(0.962-1.093)	0.45837		15251	1.015	(0.937-1.098)	0.720317	1.034	(0.990-1.08)	0.129347
rs7178873	15	40489387	BUB1B:PAK6	12789	2462	G	A	0.00190151		0.659	(0.257-1.687)	0.444463		NA	NA	(NA-NA)	NA	NA	(NA-NA)	NA
rs1061621	16	1376892	UBE2I	12763	2450	G	A	0.15		0.996	(0.911-1.088)	0.901		15213	0.981	(0.881-1.092)	0.726	1.029	(0.970-1.09)	0.339
rs11076628	16	89875246	FANCA:SPIRE2	12788	2462	A	G	0.376787		0.995	(0.931-1.062)	0.826519		15250	1.017	(0.937-1.104)	0.678935	1.035	(0.989-1.082)	0.13145
rs11643201	16	83312375	CDH13	12790	2461	G	A	0.104911		1.079	(0.975-1.194)	0.160772		15251	1.066	(0.940-1.209)	0.316557	1.002	(0.935-1.074)	0.954051
rs12051039	16	78488305	WWOX	12784	2460	A	C	0.055858		0.965	(0.841-1.107)	0.586216		15244	0.9248	(0.777-1.1)	0.376243	0.9942	(0.907-1.089)	0.900654
rs12447418	16	19539858	MIR1972-2:TMC5:GDE1:CP110:C16orf62	12788	2462	A	G	0.200098		0.994	(0.918-1.075)	0.939028		15250	0.9642	(0.875-1.062)	0.459928	0.9522	(0.902-1.005)	0.0732674
rs12923828	16	78265497	WWOX	12790	2462	T	A	0.146833		0.95	(0.868-1.038)	0.266482		15252	0.919	(0.822-1.027)	0.137241	0.9767	(0.919-1.038)	0.445304
rs16947165	16	78159277	WWOX	12789	2460	A	G	0.306086		0.953	(0.889-1.021)	0.200878		15249	0.9356	(0.859-1.019)	0.125284	0.9588	(0.916-1.004)	0.0704523
rs1886701	16	68676932	MIR1972-2:CDH3	12790	2462	C	A	0.000524521		1.407	(0.431-4.592)	0.672947		15252	1.617	(0.283-9.226)	0.588506	1.316	(0.385-4.493)	0.66113
rs2023671	16	23849839	MIR1972-2:PRKCB	12790	2462	A	C	0.257999		0.931	(0.864-1.002)	0.0397353		15252	0.9081	(0.827-0.996)	0.0425848	0.9882	(0.941-1.038)	0.63267
rs2268049	16	1371154	UBE2I:BAIAP3:C16orf42:GNPTG:UNKL	12782	2460	G	A	0.140238		NA	(NA-NA)	0.913842		15242	0.9585	(0.857-1.072)	0.45705	1.022	(0.962-1.085)	0.486281
rs249941	16	23644738	MIR1972-2:NDUFAB1:PALB2:DCTN5:PLK1	12789	2461	G	A	0.190852		0.953	(0.880-1.031)	0.202481		15250	0.9724	(0.881-1.073)	0.577951	1.018	(0.963-1.075)	0.527153
rs2745098	16	1536535	CCDC154:CLCN7:PTX4:TELO2:IFT140:TMEM204	12787	2460	G	A	0.37168		1.016	(0.952-1.083)	0.60624		15247	1.013	(0.936-1.096)	0.749584	0.9956	(0.952-1.041)	0.846924
rs3136042	16	14014055	ERCC4	12767	2454	G	A	0.019414		NA	(NA-NA)	0.971128		15221	0.9203	(0.674-1.256)	0.600522	1.095	(0.936-1.279)	0.255595
rs4785722	16	89863110	ZNF276	12783	2460	A	G	0.29		1.02	(0.951-1.095)	0.610		15243	1.064	(0.976-1.16)	0.157	1.03	(0.982-1.08)	0.217
rs6500437	16	89789898	ZNF276	12378	2371	A	G	0.28		1.019	(0.948-1.095)	0.648		14749	1.073	(0.981-1.172)	0.122	1.038	(0.988-1.09)	0.136
rs6564520	16	78306219	WWOX	12788	2462	G	A	0.41541		0.991	(0.930-1.056)	0.820092		15250	0.9817	(0.908-1.061)	0.641827	0.9949	(0.953-1.038)	0.81498
rs7135	16	19514483	MIR1972-2:TMC5:GDE1:CP110	12786	2461	A	G	0.266872		0.996	(0.927-1.069)	0.929809		15247	0.9765	(0.894-1.066)	0.594085	0.9574	(0.911-1.006)	0.081734
rs7195066	16	89836323	C16orf7:ZNF276:FANCA	12788	2460	G	A	0.311221		0.976	(0.911-1.046)	0.469102		15248	0.9842	(0.902-1.073)	0.717473	1.014	(0.967-1.062)	0.565375
rs7195624	16	9010213	CARHSP1:USP7	12777	2458	C	A	0.289367		0.99	(0.924-1.061)	0.715675		15235	1.003	(0.921-1.092)	0.943345	0.9975	(0.951-1.046)	0.917321
rs7302	16	1375263	UBE2I:BAIAP3:C16orf42:GNPTG:UNKL	12744	2448	C	A	0.112263		1.111	(1.009-1.222)	0.0350069		15192	1.088	(0.965-1.225)	0.165553	0.9894	(0.925-1.058)	0.755491
rs8061528	16	3656482	NLRC3:SLX4:DNASE1	12789	2462	G	A	0.204839		1.057	(0.978-1.142)	0.147396		15251	1.045	(0.949-1.15)	0.371972	1.018	(0.966-1.072)	0.496233
rs9927946	16	9083367	USP7	12783	2460	A	G	0.435183		1.037	(0.974-1.105)	0.245576		15243	1.046	(0.967-1.131)	0.257503	1.007	(0.964-1.052)	0.753515
rs9935995	16	19592730	MIR1972-2:CP110:C16orf62	12788	2462	G	A	0.217607		0.977	(0.905-1.055)	0.589163		15250	0.9426	(0.857-1.036)	0.219119	0.9564	(0.907-1.008)	0.095181
rs12952884	17	49226051	MIR4315-1:SPAG9:NME1-NME2:NME1:NME2:MBTD1	12758	2456	G	A	0.386092		1.067	(1-1.137)	0.0522527		15214	1.051	(0.971-1.138)	0.218167	1.035	(0.989-1.082)	0.135629
rs17734	17	1801144	RPA1:RTN4RL1	12757	2448	A	G	0.4073		1.015	(0.952-1.081)	0.519765		15205	1.019	(0.941-1.104)	0.641153	1.003	(0.960-1.047)	0.900557
rs17761467	17	1805677	RPA1:RTN4RL1	12789	2461	G	A	0.173311		1.034	(0.951-1.124)	0.245489		15250	0.9698	(0.872-1.078)	0.568428	0.9844	(0.930-1.041)	0.582548
rs17817865	17	53032425	MIR4315-1:TOM1L1:COX11:STXBP4	12790	2462	G	A	0.269047		0.905	(0.842-0.971)	0.00771139		15252	0.9215	(0.843-1.006)	0.0687327	0.9954	(0.947-1.045)	0.853564
rs2070776	17	62007498	MIR4315-1:GH2:CSH1:CSHL1:GH1:CD79B:SCN4A	12786	2462	G	A	0.337159		1.051	(0.984-1.123)	0.123242		15248	1.05	(0.966-1.141)	0.247512	1.013	(0.966-1.061)	0.593871
rs2078486	17	7583083	SHBG:ATP1B2:TP53:WRAP53:EFNB3:DNAH2	12785	2460	G	A	0.0762217		1.064	(0.949-1.192)	0.288143		15245	1.03	(0.893-1.187)	0.683047	1.011	(0.932-1.096)	0.796402
rs2239680	17	76219783	TK1:AFMID:BIRC5:EPR1:LOC283999	12786	2462	A	G	0.268757		0.953	(0.887-1.023)	0.206354		15248	0.9296	(0.850-1.016)	0.106529	0.9874	(0.941-1.036)	0.606578
rs2278637	17	8062102	ALOXE3:HES7:PER1:VAMP2:TMEM107:MIR3676:C17orf59:AURKB	12779	2456	A	C	0.348113		0.938	(0.877-1.002)	0.0540254		15235	0.9679	(0.890-1.052)	0.443282	0.9971	(0.952-1.044)	0.900622
rs2287498	17	7592560	TP53/WRAP53	12790	2462	G	A	0.08		1.065	(0.950-1.193)	0.276		15252	1.025	(0.889-1.182)	0.732	1.013	(0.934-1.098)	0.758
rs3027247	17	8071592	MIR3676:C17orf59:AURKB:C17orf44:C17orf68:PFAS	12786	2461	A	C	0.290615		0.905	(0.844-0.970)	0.00519703		15247	0.9676	(0.887-1.055)	0.45416	1.041	(0.993-1.091)	0.093191
rs3826392	17	11922904	DNAH9:ZNF18:MAP2K4	12788	2462	A	C	0.24118		1.028	(0.955-1.107)	0.481145		15250	1.036	(0.946-1.133)	0.444087	1.002	(0.953-1.054)	0.930895
rs4252596	17	37855834	STARD3:TCAP:PNMT:PGAP3:ERBB2:C17orf37:GRB7	12789	2462	C	A	0.130811		1.045	(0.952-1.147)	0.379904		15251	1.063	(0.945-1.196)	0.306393	1.008	(0.943-1.077)	0.819527
rs4794136	17	48433958	MIR4315-1:XYLT2:MRPL27:EME1:LRRC59	12785	2459	A	G	0.479172		0.998	(0.937-1.063)	0.811919		15244	0.9911	(0.916-1.072)	0.823322	0.9632	(0.921-1.006)	0.0934876
rs7217885	17	48405172	MIR4315-1:TMEM92:XYLT2:MRPL27:EME1	12790	2462	A	G	0.000262261		NA	(NA-NA)	0.813067		NA	NA	(NA-NA)	NA	NA	(NA-NA)	NA
rs8066463	17	61818390	MIR4315-1:MAP3K3:LIMD2:STRADA:CCDC47:DDX42	12788	2459	A	G	0.324031		1.014	(0.948-1.084)	0.64491		15247	0.9984	(0.917-1.086)	0.969955	1.019	(0.972-1.068)	0.426044
rs8079273	17	7597478	ATP1B2:TP53:WRAP53:EFNB3:DNAH2	12786	2462	G	A	0.0154774		0.998	(0.772-1.289)	0.950309		15248	1.201	(0.886-1.627)	0.237143	1.014	(0.850-1.208)	0.880129
rs9911630	17	41188342	APAF1:ANKS1B	12789	2462	A	G	0.33		0.993	(0.927-1.063)	0.823		15251	0.995	(0.914-1.083)	0.913	0.935	(0.890-0.982)	0.006
rs11082221	18	20531677	RBBP8	12790	2462	A	G	0.03		0.9254	(0.773-1.108)	0.360		15252	0.966	(0.779-1.197)	0.754	0.925	(0.824-1.038)	0.183
rs12966424	18	12678486	SPIRE1:PSMG2:CEP76	12778	2458	A	G	0.446541		1.023	(0.959-1.09)	0.481226		15236	0.9875	(0.911-1.069)	0.757078	0.9752	(0.933-1.019)	0.26538
rs13381022	18	18532756	ROCK1	12788	2460	A	G	0.00901758		1.236	(0.896-1.705)	0.195589		15248	1.367	(0.933-2.002)	0.108387	0.8964	(0.702-1.145)	0.38062
rs6567131	18	57579140	intergenic	12785	2461	C	G	0.45		0.981	(0.918-1.046)	0.519		15246	1.03	(0.949-1.118)	0.470	1.017	(0.973-1.063)	0.444
rs7234479	18	20599564	RBBP8	12789	2462	A	C	0.121795		0.9483	(0.859-1.046)	0.229119		15251	0.9506	(0.841-1.074)	0.417638	0.9667	(0.904-1.033)	0.317676
rs9304261	18	20606596	RBBP8	12736	2449	G	A	0.202667		0.9703	(0.896-1.05)	0.528102		15185	0.943	(0.854-1.041)	0.242799	0.9956	(0.944-1.049)	0.868569
rs9319956	18	57594068	PMAIP1	12788	2460	A	C	0.469701		0.9878	(0.925-1.054)	0.710863		15248	1.042	(0.960-1.131)	0.323978	1.03	(0.985-1.077)	0.189973
rs16963425	19	30340724	CCNE1	12780	2460	G	A	0.27372		1.056	(0.984-1.132)	0.117311		15240	1.152	(1.058-1.255)	0.0011891	1.074	(1.024-1.127)	0.00363781
rs17294094	19	48720926	SNAR-A9:LIG1:CARD8	12788	2461	A	G	0.448915		1.005	(0.943-1.07)	0.988721		15249	0.988	(0.915-1.067)	0.757446	0.9798	(0.938-1.023)	0.356701
rs1805419	19	49459104	SNAR-A9:NUCB1:DHDH:BAX:FTL:GYS1:RUVBL2	12752	2449	G	A	0.266726		0.9959	(0.927-1.069)	0.910199		15201	0.9796	(0.897-1.07)	0.646753	0.9817	(0.934-1.031)	0.459956
rs2298881	19	45926916	PPP1R13L:CD3EAP:ERCC1:FOSB	12777	2458	C	A	0.109813		0.9859	(0.891-1.091)	0.745287		15235	0.9426	(0.831-1.069)	0.358192	0.935	(0.872-1.002)	0.0576754
rs3764640	19	1207238	SBNO2:STK11:C19orf26:ATP5D:MIDN	12772	2459	C	A	0.226348		1.019	(0.945-1.097)	0.712777		15231	0.9809	(0.894-1.075)	0.681308	0.9438	(0.896-0.994)	0.0281196
rs3817074	19	49459212	SNAR-A9:NUCB1:DHDH:BAX:FTL:GYS1:RUVBL2	12788	2462	G	A	0.114328		0.9336	(0.844-1.032)	0.198091		15250	0.9239	(0.816-1.046)	0.211648	0.9402	(0.878-1.006)	0.0747645
rs7247515	19	40755915	MAP3K10:TTC9B:CNTD2:AKT2:MIR641	12788	2462	G	A	0.0818689		0.9697	(0.863-1.089)	0.716145		15250	0.9418	(0.815-1.087)	0.413839	0.9639	(0.891-1.043)	0.358893
rs751731	19	33463058	CCDC123:C19orf40:RHPN2	12787	2460	G	A	0.29596		0.9393	(0.876-1.007)	0.0970485		15247	0.9665	(0.887-1.052)	0.432709	1.032	(0.985-1.081)	0.183471
rs16979815	20	54941087	C20orf108:AURKA:CSTF1:CASS4	12787	2462	G	A	0.164962		1.003	(0.922-1.091)	0.884784		15249	1.013	(0.913-1.124)	0.800945	0.9705	(0.916-1.028)	0.305208
rs2267860	20	43655135	STK4	12788	2462	A	G	0.493934		1.011	(0.950-1.076)	0.651954		15250	1.058	(0.978-1.143)	0.157533	1.022	(0.978-1.067)	0.330413
rs2422978	20	4763108	PRNT:RASSF2	12787	2461	A	G	0.268789		1.045	(0.973-1.12)	0.191843		15248	1.052	(0.964-1.148)	0.253231	0.9996	(0.951-1.05)	0.988814
rs4813643	20	3787755	C20orf27:SPEF1:CENPB:CDC25B:C20orf29:MAVS	12781	2459	A	G	0.410039		1.022	(0.957-1.091)	0.559241		15240	1.073	(0.989-1.163)	0.0873189	1.039	(0.994-1.085)	0.0847045
rs6060446	20	30231637	ID1:MIR3193:COX4I2:BCL2L1	12790	2462	A	G	0.202826		0.9891	(0.913-1.071)	0.803935		15252	1.035	(0.939-1.14)	0.486621	1.004	(0.951-1.058)	0.895556
rs6086987	20	9685155	PAK7	12637	2434	A	G	0.0973724		0.9176	(0.820-1.026)	0.142693		15071	0.9515	(0.829-1.091)	0.476088	1.005	(0.932-1.084)	0.892855
rs6133777	20	9995950	ANKRD5	12789	2462	C	A	0.452626		1.023	(0.961-1.088)	0.393932		15251	1.006	(0.931-1.086)	0.878172	1.027	(0.984-1.071)	0.218632
rs85021	20	45179495	ZNF334:C20orf123:SLC13A3	12789	2461	A	G	0.341803		1.019	(0.953-1.089)	0.551481		15250	1.036	(0.954-1.125)	0.398067	1.023	(0.976-1.071)	0.341387
rs910671	20	43601921	PABPC1L:TOMM34:STK4	12789	2462	C	A	0.496426		1.002	(0.941-1.067)	0.867459		15251	1.05	(0.970-1.135)	0.222743	1.026	(0.982-1.071)	0.246667
rs235314	21	46271452	UBE2G2:SUMO3:PTTG1IP:ITGB2	12779	2459	A	G	0.45859		1.018	(0.955-1.084)	0.563934		15238	0.9886	(0.914-1.069)	0.775183	1.029	(0.986-1.074)	0.181082
rs2838690	21	46222486	UBE2G2:SUMO3:PTTG1IP	12788	2462	G	A	0.166393		0.9839	(0.906-1.068)	0.647416		15250	1.002	(0.906-1.107)	0.971679	0.9735	(0.922-1.028)	0.330261
rs2838693	21	46227872	UBE2G2:SUMO3:PTTG1IP	12787	2460	C	A	0.103889		0.928	(0.835-1.033)	0.158655		15247	0.9656	(0.846-1.101)	0.60171	1.056	(0.984-1.132)	0.127236
rs4239838	21	46202309	UBE2G2:SUMO3	12790	2462	A	G	0.43532		0.984	(0.924-1.049)	0.714897		15252	1.064	(0.983-1.151)	0.123921	0.9981	(0.956-1.042)	0.930757
rs104664	22	45711854	UPK3A:FAM118A:SMC1B	12789	2462	A	G	0.128647		1.075	(0.980-1.18)	0.129673		15251	1.064	(0.947-1.194)	0.295602	1.003	(0.940-1.069)	0.928067
rs181390	22	18222263	BCL2L13:BID:MIR3198:MICAL3	12783	2458	G	A	0.337675		1.008	(0.943-1.076)	0.814819		15241	1.01	(0.930-1.096)	0.814706	0.99	(0.945-1.036)	0.665005
rs4822011	22	41550954	EP300	12790	2462	A	G	0.3849		0.955	(0.896-1.018)	0.128534		15252	0.9642	(0.890-1.045)	0.372385	0.9773	(0.935-1.021)	0.307055
rs5762814	22	29203964	CCDC117:XBP1	12790	2461	G	A	0.139138		1.013	(0.927-1.106)	0.838513		15251	0.9845	(0.881-1.1)	0.7815	0.9864	(0.925-1.052)	0.677109
rs738200	22	28792887	TTC28	12790	2462	G	A	0.0858248		1.081	(0.967-1.208)	0.205413		15252	0.9873	(0.859-1.134)	0.856417	0.9635	(0.893-1.039)	0.334077
rs738207	22	35829452	HMOX1:MCM5	12786	2458	G	A	0.214347		0.973	(0.900-1.051)	0.499373		15244	1.012	(0.918-1.114)	0.815245	1.004	(0.951-1.058)	0.894878
rs740603	22	19945177	COMT	12754	2445	G	A	0.45		0.985	(0.924-1.051)	0.648		15199	0.986	(0.910-1.066)	0.718	0.980	(0.94-1.023)	0.366
rs9332362	22	19949103	TXNRD2:COMT:ARVCF	12775	2457	G	A	0.0292148		1.023	(0.847-1.234)	0.725169		15232	1.076	(0.846-1.369)	0.548766	1.008	(0.889-1.144)	0.89698
rs9605031	22	19921378	TXNRD2:COMT:ARVCF	12789	2462	G	A	0.298538		1.082	(1.01-1.16)	0.0226641		15251	1.092	(1.003-1.189)	0.0417372	0.997	(0.951-1.045)	0.899814
rs9607761	22	41371418	XPNPEP3:RBX1	12788	2461	A	T	0.000196734		NA	(NA-NA)	0.164796		NA	NA	(NA-NA)	NA	NA	(NA-NA)	NA
BRCA2 carriers										Ovaian cancer risk				Competing risk
SNP	Chromos	Position	Nearby genes	Nctrl	Ncase	allele1	allele2	MAF		HR	95% CI	p-value		N_Individuals	HR_OC	95% CI OC	p_OC	HR_BC	95% CI BC	p_BC
rs12125947	1	91990487	NLRC3:SLX4:DNASE1	7579	631	A	G	0.482095		1.033	(0.921-1.158)	0.625473		8210	1.047	(0.911-1.202)	0.520228	0.932	(0.877-0.990)	0.0227066
rs2233025	1	11735652		7574	631	G	A	0.176661		0.777	(0.657-0.919)	0.00467775		8205	0.8874	(0.732-1.075)	0.222199	1.074	(0.994-1.158)	0.0678155
rs513826	1	38166022	ZNF572:SQLE:KIAA0196	7580	631	A	G	0.446779		1.025	(0.906-1.158)	0.598387		8211	0.9872	(0.852-1.143)	0.863319	0.935	(0.880-0.994)	0.0330977
rs11102707	1	114493583	CALY:PRAP1:C10orf125:ECHS1:MIR3944:PAOX:MTG1:SPRN	7573	631	G	A	0.225256		0.932	(0.803-1.081)	0.410861		8204	0.8416	(0.702-1.009)	0.0623039	0.92	(0.856-0.988)	0.0223432
rs6674384	1	114455907	MYC	7578	631	G	A	0.27482		0.91	(0.790-1.048)	0.203158		8209	0.8139	(0.684-0.967)	0.0194695	0.925	(0.866-0.989)	0.0225067
rs13447450	1	91965850	CDC42BPA	7579	631	G	A	0.383374		1.012	(0.898-1.141)	0.84093		8210	1.016	(0.879-1.173)	0.830864	0.95	(0.893-1.011)	0.109565
rs12025623	1	21892479	HABP2:NRAP	7570	628	G	A	0.354538		1.075	(0.953-1.21)	0.264765		8198	0.9867	(0.852-1.142)	0.858219	0.957	(0.899-1.019)	0.173109
rs522712	1	91943207	EIF5B:REV1	7580	631	A	C	0.381744		0.955	(0.846-1.077)	0.486		8211	0.9606	(0.830-1.112)	0.589848	0.951	(0.894-1.011)	0.1102
rs1767429	1	21889340	SCRIB:MIR937:PUF60:NRBP2:EPPK1	7579	631	A	G	0.409501		1.06	(0.942-1.191)	0.3435		8210	0.9969	(0.864-1.149)	0.966167	0.959	(0.902-1.02)	0.185659
rs2805053	1	26446006	RIPK2	7530	626	A	G	0.492092		1.007	(0.894-1.133)	0.947396		8156	1.038	(0.900-1.197)	0.605231	1.046	(0.984-1.111)	0.147232
rs12058802	1	91923254	C10orf93	7578	631	G	A	0.480996		0.983	(0.873-1.106)	0.704438		8209	0.9531	(0.826-1.099)	0.509066	1.035	(0.973-1.099)	0.270179
rs885814	1	21875916	RAB5A:C3orf48:KAT2B	7579	631	G	A	0.313581		1.047	(0.922-1.188)	0.52351		8210	0.9748	(0.836-1.136)	0.743729	0.962	(0.901-1.027)	0.244352
rs4646091	1	15822043	FANCL	7578	631	A	G	0.238153		0.983	(0.856-1.129)	0.787645		8209	1.031	(0.876-1.213)	0.712081	1.047	(0.976-1.122)	0.199723
rs697004	1	211842808	CCDC154:CLCN7:PTX4:TELO2:IFT140:TMEM204	7579	631	C	A	0.330877		0.925	(0.819-1.046)	0.237363		8210	0.8965	(0.770-1.043)	0.156678	0.955	(0.896-1.018)	0.156058
rs9793263	1	46722389	XRCC5	7569	631	G	A	0.407256		1.126	(1.001-1.265)	0.0291701		8200	1.126	(0.976-1.299)	0.103474	0.973	(0.916-1.035)	0.397086
rs11811771	1	114463049	C20orf108:AURKA:CSTF1:CASS4	7579	631	A	G	0.429781		1.072	(0.947-1.212)	0.292375		8210	1.125	(0.969-1.305)	0.122052	1.044	(0.983-1.109)	0.158161
rs4645989	1	15850343	BAG3	7565	630	A	G	0.292739		0.952	(0.834-1.087)	0.473796		8195	0.9052	(0.772-1.061)	0.218875	0.954	(0.891-1.021)	0.173849
rs6673329	1	162794500	RNASET2	7568	630	G	A	0.0209807		NA	(NA-NA)	0.938848		8198	1.069	(0.669-1.706)	0.780183	1.114	(0.899-1.378)	0.321975
rs686083	1	38149193		7578	631	G	A	0.26276		0.996	(0.869-1.141)	0.908457		8209	0.9478	(0.806-1.114)	0.516278	0.964	(0.899-1.035)	0.316
rs13374264	1	46683014		7580	631	G	A	0.000548045		NA	(NA-NA)	0.361735		NA	NA	(NA-NA)	NA	NA	(NA-NA)	NA
rs2028706	1	23849839	CDKN1A	7580	631	A	C	0.228474		1.033	(0.904-1.18)	0.662355		8211	1.1	(0.937-1.29)	0.24395	1.04	(0.968-1.116)	0.285095
rs2020902	1	5066511	CELA2B:CASP9:DNAJC16:AGMAT	7575	630	A	G	0.153138		1.081	(0.921-1.267)	0.365836		8205	1.109	(0.918-1.34)	0.282132	1.025	(0.942-1.114)	0.565847
rs2911571	1	140148051		7578	631	G	A	0.136314		1.007	(0.847-1.195)	0.97056		8209	0.9753	(0.790-1.203)	0.81583	1.02	(0.933-1.114)	0.665537
rs11806633	1	227308416	MIR3676:C17orf59:AURKB:C17orf44:C17orf68:PFAS	7578	631	A	G	0.0690705		1.014	(0.801-1.283)	0.868776		8209	1.013	(0.762-1.346)	0.92915	0.987	(0.879-1.109)	0.832533
rs6676779	1	243875486	ANKZF1:GLB1L:STK16:TUBA4A:TUBA4B:DNAJB2:PTPRN:MIR153-1:RESP18	7578	631	A	G	0.130649		1.09	(0.913-1.3)	0.352961		8209	1.113	(0.902-1.373)	0.317669	1.021	(0.932-1.119)	0.648742
rs471144	1	152454255	GVINP1:OR2AG2:OR2AG1:OR6A2	7578	631	A	C	0.0723596		0.847	(0.665-1.078)	0.150349		8209	0.8062	(0.605-1.073)	0.139627	0.977	(0.872-1.095)	0.688144
rs2336030	1	11736600	KCNK9:TRAPPC9	7575	631	G	A	0.334329		0.997	(0.876-1.131)	0.875048		8206	0.9965	(0.856-1.16)	0.964331	1.004	(0.941-1.071)	0.896576
rs13447454	1	91966406	STK38L	7579	631	G	A	0.131912		1.146	(0.962-1.365)	0.122835		8210	1.168	(0.948-1.437)	0.143139	1.016	(0.929-1.11)	0.726843
rs1052576	1	15832543	CASP9	7550	629	G	A	0.47		1.047	(0.930-1.178)	0.442		8179	1.049	(0.911-1.207)	0.507	1.003	(0.943-1.066)	0.925
rs1136410	1	226555302	PARP1	7580	630	A	G	0.16		0.933	(0.794-1.097)	0.43		8210	0.9291	(0.765-1.128)	0.457	0.985	(0.909-1.068)	0.725
rs11903456	2	58393836	MIR4315-1:TOM1L1:COX11:STXBP4	7563	630	G	A	0.219883		0.943	(0.813-1.091)	0.373117		8193	0.9345	(0.781-1.118)	0.457974	1.066	(0.991-1.146)	0.085397
rs726379	2	231685198	SHFM1	7578	631	A	G	0.25539		1.015	(0.885-1.163)	0.98102		8209	0.9863	(0.837-1.161)	0.868309	0.928	(0.866-0.995)	0.0358199
rs768298	2	58410972	GBF1:NFKB2:PSD:FBXL15:CUEDC2:MIR146B:C10orf95	7580	631	G	A	0.304652		0.974	(0.858-1.106)	0.591742		8211	0.9901	(0.850-1.153)	0.897999	1.052	(0.985-1.124)	0.130559
rs16822647	2	227651123	AKT3	7580	631	A	G	0.0773962		1.048	(0.835-1.313)	0.666036		8211	1.032	(0.790-1.347)	0.815655	0.914	(0.814-1.026)	0.127187
rs10490250	2	58509628	WWOX	7580	631	A	C	0.203325		0.948	(0.814-1.103)	0.435799		8211	0.9453	(0.787-1.134)	0.545373	1.033	(0.959-1.112)	0.388022
rs6735656	2	202124502	SYT8:TNNI2:LSP1:MIR4298:TNNT3	7579	631	A	C	0.290378		0.965	(0.846-1.1)	0.646448		8210	0.9639	(0.822-1.13)	0.649872	1.035	(0.966-1.108)	0.32037
rs3769823	2	202122995	MIR1972-2:TMC5:GDE1:CP110:C16orf62	7580	631	G	A	0.32219		0.953	(0.839-1.082)	0.530964		8211	0.9621	(0.824-1.123)	0.624109	1.033	(0.966-1.104)	0.336374
rs10205923	2	227614557	CDH13	7580	631	G	A	0.0744124		1.014	(0.806-1.276)	0.886313		8211	0.9514	(0.722-1.253)	0.722653	0.936	(0.832-1.052)	0.267859
rs11688692	2	202189451		7579	631	A	G	0.423082		1.047	(0.927-1.182)	0.422189		8210	1.075	(0.929-1.242)	0.331281	0.968	(0.910-1.03)	0.313701
rs1421	2	47613870	CARHSP1:USP7	7580	631	A	G	0.12599		1.006	(0.834-1.212)	0.960967		8211	1.044	(0.830-1.313)	0.712412	1.055	(0.959-1.16)	0.266933
rs2305354	2	100019496	TP53BP1:MAP1A:PPIP5K1	7578	631	G	A	0.452552		0.992	(0.881-1.117)	0.990413		8209	0.9562	(0.831-1.1)	0.530424	0.965	(0.909-1.026)	0.261233
rs10495944	2	47703290	RGPD8:BUB1	7579	631	G	A	0.125152		1.016	(0.844-1.221)	0.876642		8210	1.056	(0.843-1.322)	0.63565	1.052	(0.957-1.157)	0.290041
rs668844	2	217021602	FAM53A:SLBP:TMEM129:TACC3	7210	608	C	A	0.468086		0.976	(0.863-1.104)	0.767419		7818	0.9488	(0.819-1.099)	0.483615	1.026	(0.964-1.092)	0.416511
rs6715570	2	215673440	SYT8:TNNI2:LSP1:MIR4298	7578	630	G	A	0.292215		0.96	(0.845-1.091)	0.496656		8208	0.9374	(0.803-1.093)	0.410665	1.024	(0.957-1.095)	0.487048
rs13001462	2	215678346	SLCO2A1	7573	630	G	A	0.242838		0.989	(0.863-1.133)	0.792792		8203	1.004	(0.854-1.18)	0.958171	1.029	(0.959-1.104)	0.42394
rs12052479	2	173404804	C3orf19:C3orf20	7559	629	C	A	0.212445		1.007	(0.870-1.165)	0.971769		8188	1	(0.838-1.193)	0.999662	1.028	(0.954-1.107)	0.469788
rs6721310	2	28319320	FAM53A:SLBP:TMEM129:TACC3	7580	631	G	A	0.339971		0.98	(0.866-1.109)	0.878354		8211	1.004	(0.865-1.165)	0.956999	1.027	(0.962-1.096)	0.420399
rs7609252	2	111419426	ITGA6:PDK1	7580	631	A	G	0.0266715		0.791	(0.526-1.188)	0.255463		8211	0.8084	(0.508-1.286)	0.368955	0.922	(0.762-1.115)	0.401717
rs17702263	2	173459590	TRPM8	7575	631	A	G	0.146722		0.959	(0.808-1.138)	0.614336		8206	0.8895	(0.718-1.102)	0.28357	1.013	(0.930-1.102)	0.768351
rs12464787	2	179440029	ADCK5:CPSF1:MIR939:MIR1234:SLC39A4:VPS28:TONSL:CYHR1:KIFC2:FOXH1	7580	631	G	A	0.282426		0.967	(0.850-1.101)	0.789654		8211	1.038	(0.89-1.21)	0.636219	1.021	(0.956-1.091)	0.530488
rs4663992	2	234889177	MIR4315-1:MAP3K3:LIMD2:STRADA:CCDC47:DDX42	7578	631	C	A	0.344074		0.943	(0.832-1.068)	0.262868		8209	0.8888	(0.765-1.031)	0.120458	0.986	(0.926-1.051)	0.677001
rs12477063	2	215673664	CASP3:CCDC111:MLF1IP	7578	631	A	G	0.393227		0.997	(0.885-1.122)	0.991705		8209	0.9705	(0.841-1.119)	0.67981	0.999	(0.941-1.061)	0.989257
rs11674814	2	202153846	ALS2CR12	7577	631	G	A	0.42		1.049	(0.929-1.184)	0.408		8208	1.078	(0.933-1.246)	0.306	0.97	(0.912-1.032)	0.331
rs4075604	2	173387668	Intergenic	7580	631	G	A	0.21		1.008	(0.871-1.165)	0.978		8211	1.002	(0.840-1.195)	0.979	1.026	(0.952-1.104)	0.501
rs2063018	2	21815166	BRE	7553	629	A	G	0.3		1.008	(0.888-1.144)	0.753		8182	1.027	(0.882-1.195)	0.727	1.014	(0.948-1.084)	0.687
rs6757091	2	215672793	BARD1	7576	631	G	C	0.39		0.995	(0.883-1.12)	0.931		8207	0.9636	(0.835-1.111)	0.610	0.995	(0.937-1.058)	0.891
rs16838754	3	131843104	DDB2:ACP2:NR1H3:MADD	7580	631	A	G	0.13421		0.845	(0.705-1.013)	0.0833999		8211	0.9758	(0.791-1.203)	0.818744	1.056	(0.968-1.151)	0.220255
rs13073141	3	51410485	YME1L1:MASTL:ACBD5	7580	631	A	G	0.153087		1.075	(0.917-1.259)	0.45442		8211	1.129	(0.934-1.365)	0.207871	0.976	(0.899-1.061)	0.579447
rs7626117	3	10140671	RUNDC1:RPL27:IFI35:VAT1:RND2:BRCA1	7577	631	G	A	0.182809		1.113	(0.957-1.295)	0.139032		8208	1.15	(0.961-1.376)	0.12628	0.985	(0.910-1.068)	0.725141
rs13066757	3	10045030	RAD51L1	7463	615	C	A	0.172506		1.168	(0.999-1.365)	0.0479821		8078	1.227	(1.022-1.473)	0.0282411	0.998	(0.922-1.081)	0.975126
rs4103004	3	20042834	CCNE1	7578	631	G	A	0.399013		1.02	(0.903-1.153)	0.835127		8209	1.019	(0.877-1.184)	0.80437	0.983	(0.924-1.046)	0.599913
rs6807775	3	65133697	SHBG:ATP1B2:TP53:WRAP53:EFNB3:DNAH2	7579	631	G	A	0.346407		1.148	(1.012-1.303)	0.0327223		8210	1.05	(0.901-1.223)	0.5306	1.017	(0.955-1.083)	0.593742
rs7653368	3	47985361	IL6ST	7573	631	G	A	0.317406		0.934	(0.821-1.061)	0.284214		8204	1.003	(0.861-1.169)	0.965911	1.016	(0.952-1.083)	0.628855
rs803335	3	10085035	CTDSP1:VIL1:USP37	7433	617	A	C	0.0827329		0.943	(0.757-1.174)	0.542635		8050	0.9212	(0.709-1.197)	0.539027	1.021	(0.917-1.136)	0.707564
rs7639683	3	133973731	HMOX1:MCM5	7564	630	A	G	0.450146		0.915	(0.809-1.034)	0.132147		8194	0.8371	(0.721-0.971)	0.0193554	0.965	(0.909-1.025)	0.2521
rs4552343	3	133842112	DNHD1:RRP8:ILK:TAF10:TPP1:DCHS1	7580	631	A	G	0.0670442		0.808	(0.626-1.044)	0.0825935		8211	0.7389	(0.541-1.008)	0.0560245	0.943	(0.838-1.062)	0.336819
rs13082648	3	142129008	KAT5:RNASEH2C	7580	631	G	A	0.424492		0.998	(0.883-1.127)	0.945943		8211	0.945	(0.817-1.093)	0.445998	1.007	(0.948-1.07)	0.80975
rs4241370	3	133794199	DNAH9:ZNF18:MAP2K4	7580	631	A	C	0.463525		1.019	(0.908-1.144)	0.73308		8211	0.9775	(0.850-1.124)	0.749131	0.985	(0.927-1.047)	0.636446
rs13099560	3	48204768	MIR4315-1:MRC2:MARCH10:MIR548W	7478	617	A	G	0.357505		1.022	(0.898-1.163)	0.672811		8095	1.062	(0.912-1.235)	0.440291	0.993	(0.932-1.058)	0.833726
rs13323290	3	15467029	METTL6:EAF1:COLQ	7553	631	G	A	0.06		1.057	(0.825-1.354)	0.732		8184	1.09	(0.801-1.484)	0.582	1.124	(0.983-1.284)	0.085
rs1389999	4	14858341	ZRANB1:CTBP2	7577	631	A	G	0.343689		1.011	(0.892-1.144)	0.798426		8208	0.9178	(0.791-1.064)	0.255371	0.958	(0.898-1.023)	0.202746
rs2854915	4	46227872	CDC7	7413	615	A	G	0.457524		0.86	(0.771-0.979)	0.0162096		8028	0.8334	(0.719-0.964)	0.0147317	0.955	(0.898-1.016)	0.149633
rs3774937	4	103434253	NSMCE2	7580	631	A	G	0.326331		0.923	(0.811-1.05)	0.214047		8211	0.8699	(0.744-1.016)	0.0785544	1.015	(0.953-1.081)	0.642651
rs4647601	4	185570032	NEK2	7559	629	C	A	0.469773		0.92	(0.824-1.049)	0.261438		8188	0.8706	(0.754-1.004)	0.0573465	0.962	(0.907-1.02)	0.198593
rs223497	4	103653976	JRK:PSCA:LY6K	7578	631	A	G	0.487087		0.941	(0.835-1.059)	0.323037		8209	0.8793	(0.763-1.013)	0.0758377	1.006	(0.947-1.067)	0.856552
rs980455	4	103418957	IGFBP1:IGFBP3	7580	631	A	G	0.380648		0.937	(0.828-1.061)	0.307913		8211	0.9328	(0.805-1.081)	0.354539	1.014	(0.955-1.078)	0.642381
rs9998559	4	15113921	TMEM65	7579	631	G	C	0.402923		1.054	(0.933-1.19)	0.501488		8210	0.978	(0.843-1.134)	0.768408	0.985	(0.925-1.048)	0.634413
rs230530	4	103453980	MTAP	7578	631	A	G	0.455171		1.06	(0.942-1.191)	0.36258		8209	1.066	(0.928-1.224)	0.365293	0.991	(0.934-1.052)	0.76736
rs2788865	4	1536535	TBCA	7579	631	A	G	0.392814		1.032	(0.915-1.162)	0.604088		8210	0.9957	(0.861-1.151)	0.953557	0.98	(0.922-1.042)	0.525694
rs150895	4	103712589	SLC6A1	7579	631	G	A	0.478685		0.996	(0.885-1.119)	0.955048		8210	0.9282	(0.807-1.067)	0.293226	0.979	(0.922-1.04)	0.493263
rs1354360	4	70616322	NPAT:ATM	7574	629	A	G	0.348897		0.984	(0.869-1.115)	0.8214		8203	0.9202	(0.789-1.072)	0.286306	0.975	(0.915-1.039)	0.436404
rs1503721	4	70679571	SMAD3	7580	631	A	G	0.311594		0.958	(0.841-1.09)	0.539023		8211	0.9307	(0.795-1.089)	0.369487	0.978	(0.916-1.044)	0.502617
rs971539	4	84433804	KLC1	7576	630	G	A	0.480441		1.004	(0.889-1.133)	0.988016		8206	1.069	(0.924-1.235)	0.369413	0.993	(0.932-1.058)	0.829253
rs4647610	4	185567931	RAI14	7580	631	G	A	0.130252		1.01	(0.847-1.203)	0.998234		8211	1.041	(0.844-1.283)	0.706864	1.023	(0.939-1.115)	0.596941
rs11946020	4	103944742	RAD50:IL13	7579	631	A	G	0.34123		1.018	(0.900-1.151)	0.803425		8210	0.9381	(0.807-1.09)	0.404523	1	(0.939-1.065)	0.990054
rs17355027	4	84388915	KDELC1:BIVM:ERCC5:LOC121952	7577	631	G	A	0.0986842		0.832	(0.670-1.031)	0.10366		8208	0.8844	(0.688-1.136)	0.335939	0.991	(0.894-1.099)	0.870709
rs7439493	4	110656730	CASC5:RAD51:FAM82A2	7577	631	G	A	0.434637		1.128	(1.002-1.27)	0.0443701		8208	1.155	(1.002-1.331)	0.0471872	1.011	(0.951-1.074)	0.722637
rs798755	4	1720824	OCEL1:NR2F6:USHBP1:C19orf62:ANKLE1:ABHD8:MRPL34:DDA1:ANO8	7560	630	G	A	0.207204		1.064	(0.920-1.229)	0.265159		8190	1.134	(0.952-1.35)	0.158079	1.01	(0.937-1.088)	0.798189
rs6830624	4	104020422	BARD1	7580	631	A	G	0.285653		0.994	(0.873-1.131)	0.976631		8211	0.9768	(0.838-1.139)	0.764095	1.002	(0.937-1.071)	0.944113
rs11099601	4	84382763	FAM175A	7580	631	G	A	0.48		0.997	(0.884-1.125)	0.925		8211	1.081	(0.935-1.248)	0.289	1.011	(0.948-1.076)	0.741
rs7707008	5	170801952		7579	631	G	A	0.170767		0.923	(0.787-1.082)	0.343895		8210	0.9262	(0.763-1.124)	0.437436	1.101	(1.018-1.191)	0.0159951
rs2546163	5	76995054	PMAIP1	7553	630	A	G	0.326592		1.055	(0.929-1.197)	0.384186		8183	1.054	(0.905-1.227)	0.497484	0.949	(0.889-1.015)	0.128422
rs13171253	5	43160433	GPRC5A:MIR614:GPRC5D:HEBP1	7580	631	G	A	0.122336		0.848	(0.702-1.024)	0.130872		8211	0.8946	(0.721-1.109)	0.310154	0.907	(0.825-0.996)	0.0411053
rs3797306	5	43127925	ATP1B2:TP53:WRAP53:EFNB3:DNAH2	7580	631	A	G	0.122701		0.8448	(0.7-1.02)	0.121296		8211	0.8922	(0.719-1.106)	0.297586	0.9091	(0.827-0.998)	0.0458548
rs13176284	5	34754248	PLCL2	7578	631	G	A	0.254781		1.024	(0.897-1.168)	0.706793		8209	0.9624	(0.819-1.131)	0.641647	0.954	(0.892-1.022)	0.182774
rs359445	5	173285204	SIGIRR:ANO9:PTDSS2:RNH1	7570	631	A	G	0.156139		1.079	(0.921-1.263)	0.420591		8201	1.144	(0.948-1.38)	0.158892	0.971	(0.894-1.055)	0.48883
rs2362974	5	36156654	MIR4315-1:TOM1L1:COX11:STXBP4	7579	631	A	G	0.126188		0.9802	(0.820-1.171)	0.953726		8210	1.011	(0.813-1.255)	0.9241	1.056	(0.964-1.156)	0.238807
rs6151599	5	79951032	REV3L	7570	630	A	G	0.0846951		1.222	(1.006-1.485)	0.0530006		8200	1.183	(0.929-1.505)	0.171804	1.078	(0.971-1.197)	0.157353
rs1432693	5	147609136	PURG:WRN	7578	631	A	G	0.0697405		0.898	(0.701-1.149)	0.415166		8209	0.8811	(0.663-1.17)	0.381919	0.935	(0.829-1.055)	0.277045
rs4302608	5	170840504	NEDD9	7578	631	G	A	0.436959		1.047	(0.929-1.179)	0.465465		8209	1.051	(0.913-1.21)	0.485793	0.976	(0.918-1.038)	0.449856
rs2652217	5	76980244	DEAF1:TMEM80:EPS8L2:TALDO1	7580	631	G	A	0.414992		1.04	(0.921-1.174)	0.530744		8211	1.009	(0.871-1.169)	0.904723	0.973	(0.913-1.036)	0.396899
rs12656399	5	56026843	UBE2G2:SUMO3:PTTG1IP:ITGB2	7580	631	A	G	0.102789		0.88	(0.718-1.078)	0.222583		8211	0.9808	(0.772-1.245)	0.87329	1.035	(0.937-1.142)	0.497218
rs1650697	5	79950781	HSD17B12	7579	631	G	A	0.247199		0.881	(0.763-1.016)	0.104156		8210	0.8831	(0.744-1.048)	0.154691	0.959	(0.895-1.028)	0.240272
rs7702272	5	36160854	BRE	7563	629	G	A	0.0571289		0.778	(0.594-1.017)	0.0656414		8192	0.6763	(0.488-0.937)	0.0188332	0.914	(0.801-1.042)	0.178032
rs17772583	5	131953510	MRE11A:ANKRD49:LOC643037	7580	631	A	G	0.246681		1.051	(0.918-1.202)	0.59216		8211	1.097	(0.931-1.291)	0.26788	1.024	(0.954-1.1)	0.505463
rs29635	5	85156821	UPK3A:FAM118A:SMC1B	7521	623	A	G	0.267989		0.966	(0.842-1.107)	0.554395		8144	0.9201	(0.778-1.088)	0.330614	0.98	(0.914-1.052)	0.590217
rs425463	5	79901952	CTRC:CELA2A:CELA2B:CASP9:DNAJC16	7569	630	G	A	0.339005		0.972	(0.856-1.103)	0.739468		8199	0.9541	(0.820-1.109)	0.541196	0.988	(0.929-1.053)	0.72391
rs6453340	5	76962274	MIR4315-1:BRIP1:INTS2	7580	631	C	A	0.0763001		0.897	(0.716-1.123)	0.316559		8211	0.7905	(0.596-1.048)	0.102335	0.986	(0.883-1.102)	0.812592
rs12517451	5	79920073	Intergenic	7579	631	G	A	0.25		0.872	(0.755-1.006)	0.077		8210	0.8744	(0.736-1.038)	0.125	0.961	(0.897-1.029)	0.257
rs7722173	5	176384683	UIMC1	7574	630	A	G	0.05		1.005	(0.781-1.291)	0.964		8204	1.002	(0.739-1.356)	0.991	0.983	(0.860-1.123)	0.801
rs9468322	6	28231243	LOC440300:CPEB1:AP3B2:LOC338963	7578	631	G	A	0.0435498		0.795	(0.572-1.105)	0.179877		8209	0.6928	(0.441-1.088)	0.110632	1.197	(1.043-1.374)	0.0106718
rs3777947	6	112433664	ESR2:TEX21P	7578	631	A	G	0.27549		0.957	(0.841-1.089)	0.531673		8209	0.9905	(0.852-1.152)	0.901054	0.956	(0.894-1.022)	0.185475
rs2280152	6	112375889	SLC38A9	7578	630	A	G	0.27723		0.966	(0.847-1.1)	0.618167		8208	0.9807	(0.841-1.143)	0.802561	0.955	(0.894-1.022)	0.184241
rs12208908	6	109048366	UBE2G2:SUMO3:PTTG1IP	7579	631	G	A	0.213825		1.003	(0.866-1.162)	0.910353		8210	0.9143	(0.762-1.096)	0.333821	1.049	(0.973-1.13)	0.212178
rs726230	6	11200574	RPS6KA2	7580	631	A	C	0.193034		0.961	(0.832-1.111)	0.565436		8211	0.9741	(0.813-1.167)	0.77589	1.052	(0.975-1.135)	0.187644
rs9386747	6	109038738	MIR4315-1:XYLT2:MRPL27:EME1:LRRC59	7579	631	A	G	0.113581		1.089	(0.911-1.3)	0.363079		8210	1.114	(0.901-1.378)	0.316552	1.079	(0.986-1.179)	0.0949674
rs465969	6	111655530	NHEJ1:SLC23A3:C2orf24:FAM134A	7551	630	G	A	0.0911258		1.038	(0.844-1.277)	0.647983		8181	1.008	(0.787-1.29)	0.95136	0.944	(0.845-1.054)	0.306035
rs809193	6	112020414	SHFM1	7579	630	A	G	0.221221		0.983	(0.855-1.129)	0.961912		8209	0.9403	(0.797-1.109)	0.463809	0.953	(0.886-1.025)	0.193706
rs9457245	6	167340715	MAP4	7577	631	G	A	0.0787646		0.917	(0.733-1.146)	0.401235		8208	0.9667	(0.745-1.253)	0.797838	0.945	(0.843-1.06)	0.337488
rs206776	6	12871099	PYCRL:TSTA3:ZNF623:ZNF707:BREA2	7554	626	G	A	0.316137		1.125	(0.993-1.275)	0.0379136		8180	1.161	(1.002-1.345)	0.0476157	0.993	(0.931-1.059)	0.83017
rs4710127	6	167276041	CDK1	7556	631	G	A	0.18621		0.834	(0.715-0.971)	0.016098		8187	0.8047	(0.672-0.962)	0.0173684	0.951	(0.880-1.028)	0.211251
rs210170	6	217036441	ABHD16A:LY6G6F:LY6G6E:LY6G6D:LY6G6C:C6orf25:DDAH2:CLIC1:MSH5:C6orf26:C6orf27:VARS	7578	631	G	A	0.346936		0.989	(0.875-1.117)	0.96078		8209	0.9658	(0.832-1.121)	0.647536	1.023	(0.959-1.091)	0.489647
rs1268166	6	109008232	MIR548I4:MZT1:C13orf34	7580	631	A	G	0.347826		0.959	(0.845-1.087)	0.450815		8211	0.8687	(0.744-1.014)	0.0739311	0.959	(0.900-1.024)	0.2112
rs396746	6	33557045	DDR2:HSD17B7:C1orf110	7569	630	C	A	0.129406		1.044	(0.878-1.24)	0.654859		8199	0.9871	(0.797-1.222)	0.905567	0.972	(0.887-1.066)	0.553031
rs9296095	6	33542523	DOCK1	7579	631	A	G	0.198843		0.975	(0.841-1.129)	0.63124		8210	0.9933	(0.835-1.181)	0.93951	0.975	(0.905-1.051)	0.512617
rs1480380	6	32913246	TTK	7580	631	G	A	0.0840945		0.825	(0.654-1.04)	0.0836046		8211	0.8566	(0.648-1.132)	0.2763	1.018	(0.909-1.138)	0.761434
rs2269058	6	37324857	FRY:ZAR1L:BRCA2	7579	631	C	A	0.50067		0.957	(0.848-1.08)	0.592117		8210	0.9837	(0.851-1.136)	0.823592	1.011	(0.952-1.073)	0.721894
rs3130000	6	30628082	ZNF131	7579	631	G	A	0.0786236		0.88	(0.707-1.095)	0.290117		8210	0.8816	(0.674-1.153)	0.35739	1.014	(0.906-1.135)	0.804642
rs2179070	6	102871259	LOC222699:ZNF193:ZKSCAN4:NKAPL:ZNF187:PGBD1	7579	631	A	G	0.0700365		0.934	(0.732-1.192)	0.584821		8210	0.911	(0.676-1.226)	0.538839	1.006	(0.892-1.134)	0.924306
rs13210247	6	111922720	FAM164A	7580	631	A	G	0.0700889		0.93	(0.734-1.178)	0.557736		8211	0.923	(0.692-1.231)	0.585728	1.006	(0.891-1.134)	0.926842
rs1077394	6	31610384	TRPT1:NUDT22:DNAJC4:VEGFB:FKBP2:PPP1R14B:PLCB3:BAD:GPR137:KCNK4:C11orf20:ESRRA:TRMT112:PRDX5	7580	631	A	G	0.318353		1.015	(0.896-1.15)	0.805792		8211	1.087	(0.941-1.255)	0.257275	0.996	(0.933-1.063)	0.908536
rs17254634	6	80751942	PLEC:PARP10:GRINA:SPATC1:OPLAH	7575	631	G	A	0.181696		0.991	(0.852-1.152)	0.791834		8206	0.9943	(0.829-1.192)	0.950845	1.001	(0.924-1.083)	0.986165
rs733590	6	36645203	NECAB1	7575	631	A	G	0.374056		1.001	(0.884-1.131)	0.857164		8206	0.9975	(0.861-1.155)	0.973148	1.004	(0.944-1.067)	0.905333
rs2284923	6	37348920	ASCL2:C11orf21:TSPAN32	7580	631	G	A	0.463951		0.974	(0.865-1.099)	0.780198		8211	0.9794	(0.847-1.132)	0.778606	0.993	(0.934-1.055)	0.820417
rs3176326	6	36647289	RBMS3	7578	631	G	A	0.214521		1.007	(0.874-1.16)	0.997356		8209	1.061	(0.898-1.252)	0.486158	1.009	(0.937-1.085)	0.819345
rs1144708	6	31710020	BUB1B:PAK6	7580	631	G	A	0.365972		0.976	(0.863-1.103)	0.819894		8211	0.9355	(0.809-1.081)	0.364637	0.992	(0.932-1.057)	0.8218
rs7804722	7	92288106	FANCD2:C3orf24:C3orf10:VHL	7573	629	A	G	0.310107		0.969	(0.857-1.096)	0.678876		8202	0.9621	(0.830-1.115)	0.606832	1.05	(0.983-1.12)	0.141774
rs10241838	7	96343665	XAF1:FBXO39:TEKT1:ALOX12P2	7564	631	A	G	0.340024		1.004	(0.887-1.137)	0.976957		8195	0.9706	(0.834-1.129)	0.698739	1.025	(0.961-1.094)	0.449262
rs6968090	7	96318575	MAP3K1:C5orf35:MIER3	7542	627	A	G	0.214225		0.97	(0.842-1.116)	0.619477		8169	1.011	(0.853-1.198)	0.897051	0.973	(0.903-1.049)	0.482812
rs12666800	7	45906594	LOC643749:TRAF3IP2	7570	630	G	A	0.120976		1.06	(0.886-1.266)	0.480039		8200	1.018	(0.818-1.267)	0.870882	1.027	(0.937-1.124)	0.567056
rs6982040	8	48708742	PRKDC	7574	629	G	A	0.00402292		0.918	(0.371-2.27)	0.79076		NA	NA	(NA-NA)	NA	NA	(NA-NA)	NA
rs10104637	8	95393925	MAP3K10:TTC9B:CNTD2:AKT2:MIR641	7580	631	A	G	0.0398246		1.243	(0.943-1.639)	0.141964		8211	1.182	(0.852-1.64)	0.315543	0.933	(0.801-1.088)	0.377349
rs13279327	8	48442384	PIK3CG	7579	631	A	G	0.305725		1.089	(0.960-1.236)	0.215363		8210	1.072	(0.920-1.249)	0.368597	1.04	(0.974-1.109)	0.240724
rs2450551	8	95351843	PTPN22:BCL2L15:AP4B1:DCLRE1B:HIPK1	7577	630	C	A	0.0453881		0.92	(0.694-1.245)	0.578575		8207	0.9938	(0.708-1.395)	0.971424	0.967	(0.839-1.116)	0.651204
rs2445614	8	128212594	TFDP1:ATP4B:GRK1	7580	631	G	A	0.245524		0.993	(0.867-1.136)	0.999184		8211	0.9959	(0.846-1.172)	0.960409	1.01	(0.941-1.083)	0.78187
rs1011683	8	91020834	EI24:STT3A:CHEK1	7580	631	A	C	0.327609		1.033	(0.910-1.172)	0.624174		8211	0.9628	(0.823-1.126)	0.634159	1.007	(0.944-1.073)	0.840739
rs11574398	8	31025343	RBBP8	7580	631	G	A	0.359579		1.002	(0.887-1.131)	0.902587		8211	1.035	(0.894-1.197)	0.643924	0.997	(0.936-1.062)	0.928891
rs11574158	8	30891353	MANBA:UBE2D3	7577	631	G	A	0.0316155		0.899	(0.626-1.29)	0.529703		8208	0.7882	(0.498-1.245)	0.307763	0.964	(0.811-1.146)	0.679543
rs2039971	9	120233601	NHEDC2:BDH2:CENPE	7575	631	C	A	0.0476481		1.127	(0.870-1.457)	0.336837		8206	1.18	(0.884-1.573)	0.260434	0.896	(0.775-1.036)	0.140117
rs10972278	9	35000289	C12orf71	7580	631	A	G	0.294179		0.993	(0.869-1.135)	0.821354		8211	1.004	(0.859-1.174)	0.957463	0.956	(0.894-1.022)	0.190911
rs595429	9	35055669		7579	631	G	A	0.457004		0.856	(0.758-0.964)	0.00590076		8210	0.8378	(0.727-0.965)	0.014242	0.962	(0.906-1.022)	0.209333
rs16923815	9	100480357	NPAT:ATM	7576	631	G	A	0.308273		1.01	(0.883-1.154)	0.779406		8207	1.019	(0.871-1.192)	0.812774	0.984	(0.922-1.05)	0.626713
rs2069422	9	32953711	LOC157381:ZNF572:SQLE:KIAA0196	7576	631	A	C	0.106068		0.93	(0.761-1.135)	0.416662		8207	0.8487	(0.666-1.081)	0.184364	0.952	(0.865-1.047)	0.31268
rs11535662	9	140143801	PPP1R10:MRPS18B:ATAT1:C6orf136:DHX16:KIAA1949:NRM:MDC1	7576	630	G	A	0.0703753		1.224	(0.980-1.528)	0.0859447		8206	1.256	(0.957-1.649)	0.100273	0.997	(0.884-1.124)	0.965978
rs28631372	9	1721654	MLXIP:LRRC43:IL31:B3GNT4:DIABLO:VPS33A	7528	626	G	A	0.25742		1.044	(0.913-1.192)	0.648231		8154	1.05	(0.891-1.236)	0.561676	1.019	(0.951-1.091)	0.595762
rs6597642	9	133725767	DHFR:MTRNR2L2:MSH3	7579	631	G	A	0.130633		0.975	(0.819-1.161)	0.761522		8210	0.9752	(0.787-1.208)	0.817856	1.013	(0.926-1.107)	0.781737
rs1056171	9	133761001	CCDC117:XBP1	7573	630	A	G	0.475009		0.994	(0.883-1.119)	0.886554		8203	0.993	(0.860-1.146)	0.923414	0.995	(0.938-1.056)	0.883699
rs12004745	9	21812349	MTAP	7580	631	T	A	0.05		1.171	(0.906-1.514)	0.198		8211	1.231	(0.923-1.641)	0.156	0.882	(0.765-1.018)	0.085
rs4877005	9	92325852	LOC100129066	7564	627	A	G	0.38		1.035	(0.916-1.168)	0.616		8191	1.007	(0.873-1.161)	0.923	0.937	(0.880-0.999)	0.046
rs4147155	10	104536771	CHUK:CWF19L1:SNORA12:BLOC1S2:PKD2L1	7580	631	G	A	0.138351		0.923	(0.772-1.104)	0.41791		8211	1.055	(0.853-1.304)	0.622908	1.079	(0.988-1.178)	0.0888901
rs6584354	10	102007714	DNHD1:RRP8:ILK:TAF10:TPP1:DCHS1	7501	624	A	C	0.498585		0.989	(0.869-1.107)	0.632371		8125	0.9409	(0.816-1.084)	0.398377	0.95	(0.894-1.011)	0.106715
rs1904415	10	21607600	FBXO2:FBXO44:FBXO6:MAD2L2:C1orf187	7529	629	A	C	0.240684		0.955	(0.832-1.095)	0.544858		8158	0.8881	(0.747-1.055)	0.176521	0.945	(0.881-1.015)	0.121202
rs1127687	10	115490109	TOLLIP:LOC255512:BRSK2	7577	631	G	A	0.228436		1.076	(0.936-1.235)	0.390136		8208	1.004	(0.848-1.189)	0.962464	1.029	(0.959-1.105)	0.420532
rs12255933	10	126579158	FAM175A:AGPAT9	7580	631	C	A	0.172634		1.104	(0.948-1.284)	0.20674		8211	1.12	(0.932-1.345)	0.224915	0.985	(0.912-1.066)	0.721324
rs11574852	10	104161475	FAM164A	7371	610	A	C	0.0340809		0.947	(0.684-1.312)	0.704976		7981	1.169	(0.815-1.676)	0.394902	1.092	(0.928-1.285)	0.285931
rs1937881	10	62540453	ANKRD26:YME1L1:MASTL:ACBD5	7580	631	G	A	0.182499		1.134	(0.979-1.313)	0.116842		8211	1.156	(0.970-1.378)	0.104506	1.037	(0.959-1.122)	0.359963
rs2419851	10	115380608	FANCA:SPIRE2	7580	631	C	A	0.110096		1.149	(0.962-1.372)	0.14402		8211	1.086	(0.873-1.349)	0.458623	1.028	(0.935-1.13)	0.571168
rs4353229	10	115489589	WWOX	7568	630	A	G	0.254574		0.996	(0.869-1.141)	0.885788		8198	0.9666	(0.819-1.14)	0.686463	1.001	(0.934-1.074)	0.96827
rs10764686	10	27475494	SBNO2:STK11:C19orf26:ATP5D:MIDN	7466	625	G	A	0.35212		0.976	(0.861-1.106)	0.912336		8091	1.014	(0.873-1.177)	0.854018	0.994	(0.933-1.059)	0.857204
rs12411618	10	94052164	WISP1:NDRG1	7578	630	G	A	0.139742		1.182	(1.001-1.395)	0.048006		8208	1.109	(0.902-1.362)	0.324414	1.008	(0.925-1.098)	0.853644
rs788209	10	27434716	UBE2G2:SUMO3	7557	628	A	C	0.140073		0.842	(0.705-1.003)	0.0999753		8185	0.8112	(0.657-1)	0.0504118	0.979	(0.899-1.068)	0.641438
rs2227309	10	111885752	CASP7	7576	631	G	A	0.25		0.990	(0.863-1.134)	0.808		8207	0.9586	(0.811-1.132)	0.618	1.001	(0.933-1.073)	0.987
rs4647709	11	47237359	CASP10:CASP8:ALS2CR12	7579	631	G	A	0.0897686		0.984	(0.802-1.206)	0.867386		8210	0.8944	(0.693-1.153)	0.389472	0.916	(0.825-1.017)	0.346
rs326222	11	47259668	ALPL:RAP1GAP	7580	631	G	A	0.279686		0.971	(0.849-1.111)	0.603599		8211	1.017	(0.867-1.192)	0.832825	0.958	(0.894-1.026)	0.223326
rs4435030	11	74806005	GPR19:CDKN1B:APOLD1:MIR613	7580	631	C	A	0.385946		1.022	(0.904-1.154)	0.684221		8211	1.003	(0.869-1.156)	0.970184	0.954	(0.897-1.015)	0.137245
rs656040	11	65621057	CPEB4	7574	630	G	A	0.327584		1.034	(0.913-1.172)	0.651185		8204	1.028	(0.886-1.191)	0.717326	0.961	(0.902-1.025)	0.229359
rs17140162	11	125490616	CDKN1A	7580	631	C	A	0.00133967		1.704	(0.574-5.051)	0.384186		8211	1.359	(0.190-9.687)	0.759658	1.852	(1.096-3.128)	0.0212659
rs2255538	11	6629042	SLC4A7	7575	625	G	A	0.260305		1.095	(0.955-1.255)	0.172957		8200	1.135	(0.962-1.34)	0.132194	0.967	(0.902-1.038)	0.361241
rs7928685	11	6773439	C9orf131:VCP:FANCG:PIGO:STOML2:KIAA1539	7580	631	A	G	0.163561		1.047	(0.894-1.225)	0.488044		8211	1.026	(0.847-1.241)	0.792247	0.954	(0.881-1.035)	0.259936
rs511484	11	100918433	MIR1972-2:ABCC11:LONP2	7578	631	G	C	0.257888		1.115	(0.975-1.274)	0.104933		8209	1.09	(0.928-1.279)	0.294994	0.974	(0.909-1.045)	0.468104
rs6592537	11	70172975	HRAS:LRRC56:C11orf35:RASSF7:MIR210:LOC143666:PHRF1:IRF7:CDHR5:SCT	7580	631	G	A	0.113872		0.915	(0.758-1.103)	0.342482		8211	0.8053	(0.640-1.013)	0.0642563	1.021	(0.933-1.118)	0.646987
rs11606458	11	6623918	PKP3:SIGIRR:ANO9:PTDSS2:RNH1	7579	631	G	A	0.250183		1.145	(1.001-1.309)	0.0432925		8210	1.202	(1.022-1.413)	0.0258003	0.982	(0.916-1.054)	0.623729
rs9667035	11	1907653	ARPC3:GPN3:C12orf24:VPS29:RAD9B	7538	627	G	A	0.031537		0.801	(0.559-1.147)	0.218971		8165	0.8056	(0.530-1.224)	0.311331	1.042	(0.886-1.225)	0.620042
rs3212907	11	69468776	ARFGAP2:PACSIN3:DDB2:ACP2:NR1H3	7580	631	G	A	0.039581		1.19	(0.882-1.604)	0.274755		8211	1.215	(0.844-1.746)	0.293906	1.088	(0.921-1.286)	0.318725
rs660442	11	64042997	FYN	7568	630	G	A	0.212064		1.081	(0.935-1.251)	0.322112		8198	1.077	(0.906-1.281)	0.398616	0.99	(0.919-1.066)	0.796713
rs2957873	11	104108743	ZNF131:MGC42105	7579	631	A	G	0.177832		1.016	(0.867-1.189)	0.881826		8210	1.105	(0.916-1.331)	0.295538	1.007	(0.927-1.095)	0.863302
rs10838158	11	43752522	CELA2A:CELA2B:CASP9:DNAJC16	7566	630	A	G	0.307528		1.096	(0.968-1.24)	0.141894		8196	1.132	(0.977-1.312)	0.098907	1.003	(0.939-1.071)	0.92042
rs4244812	11	65480768	CDC7	7574	631	A	G	0.479707		0.94	(0.831-1.063)	0.413299		8205	0.8721	(0.752-1.01)	0.0679645	0.975	(0.918-1.036)	0.415029
rs228592	11	108123189	TALDO1:PDDC1:CEND1:SLC25A22:LRDD:RPLP2:SNORA52:PNPLA2:EFCAB4A:CD151:POLR2L:TSPAN4	7558	628	A	C	0.42701		0.996	(0.884-1.121)	0.958065		8186	0.9738	(0.844-1.123)	0.714759	0.994	(0.935-1.059)	0.872202
rs7110437	11	43780553	PRKAR2B	7580	631	A	C	0.305505		1.096	(0.969-1.24)	0.140047		8211	1.136	(0.981-1.316)	0.0883305	1.006	(0.942-1.074)	0.855978
rs2279238	11	47282024	CAB39:ITM2C	7580	631	G	A	0.143649		0.979	(0.825-1.161)	0.794972		8211	1.068	(0.870-1.311)	0.526893	1.022	(0.935-1.118)	0.627605
rs183459	11	108089197	MIR1972-2:PRKCB	7579	631	A	C	0.416139		0.966	(0.858-1.088)	0.663383		8210	0.9642	(0.836-1.112)	0.61591	1.004	(0.943-1.069)	0.896366
rs6589007	11	108040104	ATE1:NSMCE4A:TACC2	7580	631	G	A	0.423883		0.9907	(0.879-1.116)	0.974181		8211	0.9798	(0.849-1.13)	0.779287	1.005	(0.944-1.069)	0.886379
rs10765682	11	94198269	MMAB:MVK	7580	631	A	G	0.0995616		1.075	(0.887-1.301)	0.534734		8211	1.054	(0.834-1.331)	0.657987	1.007	(0.912-1.111)	0.888344
rs7118659	11	43817125	OS9:AGAP2:LOC100130776:TSPAN31:CDK4:MARCH9:CYP27B1:METTL1:FAM119B:TSFM:AVIL	7579	631	A	G	0.310049		1.087	(0.960-1.229)	0.181095		8210	1.122	(0.968-1.299)	0.124521	1.009	(0.944-1.077)	0.794851
rs12271212	11	77197817	MYO9B:USE1:OCEL1:NR2F6:USHBP1:C19orf62:ANKLE1:ABHD8	7580	631	G	A	0.232797		0.997	(0.867-1.146)	0.950908		8211	1.078	(0.914-1.272)	0.370443	1.008	(0.936-1.084)	0.835798
rs7131110	11	43846850	HSD17B12	7569	629	G	A	0.31		1.086	(0.960-1.229)	0.184		8198	1.121	(0.967-1.298)	0.128	1.008	(0.944-1.076)	0.812
rs11060333	12	122678607	RAP1A:C1orf183	7572	630	A	G	0.250305		1.061	(0.924-1.217)	0.499563		8202	0.9943	(0.843-1.172)	0.945643	0.94	(0.878-1.007)	0.077813
rs2162679	12	67400490	NANOS1:EIF3A:SNORA19	7577	631	A	G	0.163621		0.9122	(0.775-1.073)	0.282481		8208	0.8437	(0.696-1.023)	0.0835379	0.923	(0.850-1.002)	0.0570549
rs2066827	12	28318008	WWOX	7561	631	A	C	0.248047		1.093	(0.949-1.257)	0.253697		8192	1.08	(0.911-1.279)	0.373506	1.047	(0.975-1.125)	0.20461
rs7967755	12	986004	PLEC:MIR661:PARP10:GRINA:SPATC1	7580	631	A	G	0.158629		1.201	(1.028-1.402)	0.0288081		8211	1.145	(0.946-1.385)	0.162902	0.97	(0.893-1.054)	0.479033
rs10846535	12	124130388	CPEB2	7580	630	A	G	0.427223		1.116	(0.988-1.26)	0.0982189		8210	1.213	(1.049-1.402)	0.00924466	1.056	(0.994-1.121)	0.0774665
rs2069502	12	22008026	USP7	7579	631	G	A	0.304811		1.013	(0.891-1.152)	0.737872		8210	1.003	(0.861-1.169)	0.967223	1.027	(0.962-1.095)	0.422117
rs7971725	12	98981483		7580	631	T	A	6.08939e-05		NA	(NA-NA)	0.813884		NA	NA	(NA-NA)	NA	NA	(NA-NA)	NA
rs10160981	12	110904075	WNK1:RAD52	7575	631	G	A	0.194126		1.009	(0.865-1.177)	0.888405		8206	1.04	(0.866-1.247)	0.675582	1.025	(0.949-1.106)	0.529715
rs3850952	12	124090802	FOXO3:NCRNA00222	7572	630	C	A	0.28932		1.12	(0.982-1.277)	0.107544		8202	1.186	(1.014-1.386)	0.0326549	1.037	(0.970-1.108)	0.28352
rs12368451	12	99115661	NBN:DECR1	7384	618	A	G	0.4507		1.043	(0.923-1.178)	0.518914		8002	1.045	(0.903-1.208)	0.551401	1.016	(0.955-1.08)	0.615669
rs922275	12	27402709	BAK1:GGNBP1:C6orf227:ITPR3	7577	631	G	A	0.354167		1.093	(0.968-1.233)	0.148369		8208	1.067	(0.922-1.233)	0.382312	0.992	(0.933-1.056)	0.820561
rs708170	12	27237085	MIR4315-1:GH2:CSH1:CSHL1:GH1:CD79B:SCN4A	7562	630	G	A	0.306274		0.955	(0.841-1.084)	0.525709		8192	0.9803	(0.842-1.141)	0.797087	0.9837	(0.922-1.049)	0.615369
rs10876864	12	56401085	STK38L	7575	631	A	G	0.406958		1.036	(0.920-1.166)	0.564585		8206	0.9999	(0.867-1.153)	0.999284	0.9953	(0.937-1.057)	0.877761
rs1291351	12	13084082	CASP7:C10orf81	7580	631	C	G	0.0236268		0.919	(0.614-1.374)	0.632125		8211	0.8589	(0.532-1.386)	0.533183	0.9999	(0.822-1.215)	0.99951
rs10842893	12	27422886	RYK	7556	631	G	A	0.0960669		0.902	(0.724-1.123)	0.390977		8187	0.9182	(0.704-1.196)	0.52694	1.007	(0.910-1.114)	0.892251
rs203343	12	211831380	SNX18	7576	629	A	G	0.175137		1.106	(0.954-1.283)	0.221654		8205	1.117	(0.933-1.336)	0.228186	1.003	(0.925-1.087)	0.935412
rs904654	12	120189888	NFKB1	7579	630	G	A	0.472713		1.112	(0.987-1.253)	0.0642982		8209	1.156	(0.999-1.336)	0.0501305	1.007	(0.949-1.069)	0.808692
rs1502337	12	111062852	SNTB1	7578	631	G	A	0.339993		0.932	(0.818-1.061)	0.269583		8209	0.959	(0.824-1.116)	0.587082	0.9907	(0.930-1.055)	0.769453
rs6490269	12	120207175	PPFIA1:MIR548K	7517	627	G	A	0.493247		1.105	(0.980-1.244)	0.0856197		8144	1.142	(0.988-1.318)	0.0705619	1.007	(0.949-1.069)	0.809001
rs17497606	12	27494449	CIT:MIR1178	7568	631	G	A	0.222527		1.042	(0.903-1.202)	0.595736		8199	1.077	(0.907-1.278)	0.396033	1.002	(0.929-1.08)	0.960402
rs207928	12	7583083	XRCC5	7580	631	G	A	0.41		1.005	(0.888-1.136)	0.996		8211	1.042	(0.898-1.208)	0.586	0.992	(0.932-1.054)	0.787
rs703842	12	58162739	CYP27B1/METTL1	7417	610	A	G	0.31		1.02	(0.895-1.162)	0.666		8027	1.012	(0.867-1.181)	0.876	1.016	(0.952-1.084)	0.628
rs11164141	13	114259570	LOC100129269:RAP1A	7578	630	A	G	0.370492		0.851	(0.75-0.966)	0.0105967		8208	0.8776	(0.754-1.021)	0.0915338	1.042	(0.978-1.109)	0.205021
rs4150792	13	114288971	IGF1	7579	631	G	A	0.371194		0.863	(0.760-0.979)	0.0194093		8210	0.8854	(0.760-1.031)	0.11625	1.043	(0.979-1.11)	0.194288
rs12870278	13	103543243	CCDC109B:CASP6:PLA2G12A:CFI	7580	630	G	A	0.188368		1.12	(0.962-1.302)	0.0993322		8210	1.181	(0.989-1.41)	0.0650669	0.9438	(0.873-1.019)	0.141022
rs7328482	13	21877418	RPA1:RTN4RL1	7580	631	A	C	0.0396419		0.915	(0.664-1.261)	0.549948		8211	0.8757	(0.592-1.294)	0.50526	1.017	(0.865-1.195)	0.836964
rs2232642	13	115489167		7578	631	G	A	0.000182726		NA	(NA-NA)	0.179665		NA	NA	(NA-NA)	NA	NA	(NA-NA)	NA
rs4119478	13	73254212	SNX32:CFL1:MUS81:EFEMP2:CTSW:FIBP:CCDC85B:FOSL1	7573	631	G	A	0.305217		0.957	(0.837-1.093)	0.544328		8204	0.9901	(0.842-1.164)	0.904376	1.008	(0.944-1.077)	0.800678
rs9509492	13	21608971	ARTN:IPO13:DPH2:ATP6V0B:B4GALT2:CCDC24:SLC6A9	7580	631	G	A	0.292047		0.946	(0.828-1.079)	0.411616		8211	0.9577	(0.816-1.124)	0.595989	0.9905	(0.924-1.061)	0.785471
rs1408047	13	103484918	CIT	7580	631	A	G	0.298746		0.968	(0.853-1.099)	0.59443		8211	0.9802	(0.841-1.141)	0.796153	1.004	(0.937-1.075)	0.903499
rs1887894	13	68676932	LATS2	7580	631	G	A	0.27		0.956	(0.834-1.096)	0.531		8211	0.9597	(0.814-1.13)	0.621	0.968	(0.901-1.038)	0.356
rs3020445	14	47249294	PEX2	7580	631	G	A	0.429728		0.928	(0.820-1.049)	0.24186		8211	0.9665	(0.836-1.117)	0.644971	1.043	(0.980-1.108)	0.180324
rs17105760	14	68984500	FAM53A:SLBP:TMEM129:TACC3	7580	631	A	G	0.00188771		3.194	(1.258-8.11)	0.0171231		NA	NA	(NA-NA)	NA	NA	(NA-NA)	NA
rs17106237	14	69203145	ACAT1:NPAT	7578	631	G	A	0.128517		0.928	(0.772-1.114)	0.413755		8209	0.9316	(0.749-1.159)	0.524195	1.017	(0.93-1.113)	0.705726
rs2896489	14	43656535	FAM45A:FAM45B:SFXN4:PRDX3:GRK5	7578	631	G	A	0.314289		1.024	(0.897-1.167)	0.789192		8209	0.9652	(0.825-1.129)	0.658572	0.9794	(0.917-1.045)	0.532367
rs861537	14	104167075	ANKRD28	7520	627	A	G	0.313919		1.038	(0.910-1.183)	0.634603		8147	0.9775	(0.835-1.143)	0.775851	0.9824	(0.920-1.049)	0.593638
rs12880109	14	68813032	SILV:CDK2:RAB5B:SUOX:IKZF4:RPS26	7580	631	A	G	0.406102		1.051	(0.930-1.187)	0.402514		8211	1.031	(0.891-1.193)	0.678352	0.9942	(0.933-1.058)	0.855317
rs4983559	14	105277209	PAK7	7569	629	A	G	0.391559		0.994	(0.879-1.122)	0.781318		8198	1.069	(0.926-1.233)	0.360332	1.002	(0.942-1.066)	0.94773
rs570933	15	43824030	MIR4315-1:TOM1L1:COX11	7580	631	A	G	0.322007		0.923	(0.810-1.052)	0.188224		8211	0.9842	(0.844-1.148)	0.838485	1.064	(0.998-1.134)	0.0552548
rs7165509	15	40945900	NFKB1	7580	631	A	G	0.43052		0.874	(0.774-0.986)	0.0498191		8211	0.8617	(0.745-0.995)	0.0436043	0.9456	(0.889-1.005)	0.0709251
rs12902785	15	66928241	RPA1:RTN4RL1	7580	631	A	G	0.316466		0.994	(0.878-1.124)	0.978321		8211	1.011	(0.873-1.171)	0.880584	0.9682	(0.907-1.033)	0.33025
rs12592524	15	41003463	NHEDC1:NHEDC2	7580	631	A	G	0.415662		0.889	(0.786-1.004)	0.0955798		8211	0.8686	(0.750-1.005)	0.0590531	0.9628	(0.905-1.023)	0.221719
rs4779041	15	83337059	ZFAT:ZFAT-AS1	7579	631	G	A	0.349513		1.017	(0.898-1.152)	0.764294		8210	1.055	(0.910-1.224)	0.474933	1.03	(0.967-1.097)	0.353608
rs1565866	15	40455894	UBE2G2:SUMO3:PTTG1IP	7580	631	C	A	0.46322		1.024	(0.910-1.152)	0.732495		8211	1.01	(0.876-1.164)	0.889646	1.021	(0.961-1.084)	0.501547
rs7178873	15	40489387	OTP:TBCA	7580	631	G	A	0.00176592		0.6746	(0.161-2.822)	0.558182		8211	1.039	(0.227-4.733)	0.960917	1.149	(0.659-2.002)	0.624607
rs6494633	15	67423306	CELA2B:CASP9:DNAJC16:AGMAT	7576	631	G	A	0.433898		1.039	(0.924-1.167)	0.545344		8207	1.006	(0.873-1.158)	0.937325	0.99	(0.930-1.053)	0.751145
rs2118612	15	33525680	SMAD3	7580	631	A	G	0.21		0.949	(0.818-1.098)	0.437		8211	0.9524	(0.798-1.135)	0.586	1.036	(0.961-1.116)	0.349
rs2268049	16	1371154	UBE2I:BAIAP3:C16orf42:GNPTG:UNKL	7574	631	G	A	0.153687		0.963	(0.820-1.131)	0.635601		8205	0.9654	(0.788-1.182)	0.733128	1.115	(1.027-1.21)	0.00914207
rs11076628	16	89875246	NFKB1	7577	630	A	G	0.371695		0.935	(0.826-1.058)	0.276416		8207	0.8653	(0.745-1.005)	0.0583153	0.9319	(0.876-0.991)	0.0246682
rs12447418	16	19539858	ABL1:QRFP:FIBCD1	7580	631	A	G	0.21319		1.096	(0.951-1.262)	0.193297		8211	1.037	(0.878-1.223)	0.671033	0.9544	(0.887-1.026)	0.208433
rs249941	16	23644738	ID1:MIR3193:COX4I2:BCL2L1	7579	631	G	A	0.195676		1.066	(0.921-1.232)	0.390834		8210	1.012	(0.846-1.209)	0.89517	0.9514	(0.880-1.027)	0.203916
rs6564520	16	78306219	STARD3:TCAP:PNMT:PGAP3:ERBB2:C17orf37:GRB7	7578	631	G	A	0.406749		1.056	(0.938-1.188)	0.446106		8209	1.036	(0.897-1.197)	0.629324	1.04	(0.976-1.108)	0.21865
rs9935995	16	19592730	STK4	7578	631	G	A	0.231088		1.124	(0.979-1.291)	0.0915971		8209	1.075	(0.916-1.261)	0.377082	0.9695	(0.903-1.04)	0.38884
rs12923828	16	78265497	TXNRD2:COMT:ARVCF	7580	631	T	A	0.148094		0.933	(0.785-1.107)	0.454157		8211	0.8959	(0.731-1.097)	0.287039	0.9364	(0.861-1.018)	0.122359
rs11643201	16	83312375	ZRANB1:CTBP2:MIR4296	7580	631	G	A	0.10285		1.08	(0.892-1.307)	0.435403		8211	1.013	(0.801-1.281)	0.912696	1.054	(0.953-1.167)	0.303846
rs2745098	16	131932203	VRK2:FANCL	7575	631	G	A	0.367597		0.986	(0.873-1.113)	0.788309		8206	0.9343	(0.807-1.081)	0.361455	0.9626	(0.905-1.024)	0.224997
rs7302	16	1375263	CASP7:C10orf81	7534	624	C	A	0.109708		0.891	(0.735-1.079)	0.25168		8158	0.9735	(0.780-1.214)	0.811991	1.023	(0.926-1.129)	0.653139
rs12051039	16	78488305	SULT1E1	7572	628	A	C	0.0567683		1.1	(0.854-1.417)	0.354142		8200	1.121	(0.825-1.522)	0.463714	1.065	(0.935-1.213)	0.339626
rs7195066	16	89836323	RAD21:NCRNA00255:MIR3610	7578	631	G	A	0.307467		0.913	(0.801-1.042)	0.17483		8209	0.8752	(0.747-1.024)	0.0963611	0.9646	(0.905-1.028)	0.266412
rs7135	16	19514483	TOP1MT:C8orf51:RHPN1	7580	631	A	G	0.279747		1.114	(0.977-1.27)	0.0804312		8211	1.119	(0.960-1.302)	0.14816	0.9946	(0.930-1.064)	0.874105
rs8061528	16	3656482		7579	631	G	A	0.212911		1.025	(0.891-1.178)	0.749735		8210	0.9706	(0.818-1.15)	0.730997	1.009	(0.937-1.087)	0.803355
rs3136042	16	14014055	XPNPEP3:RBX1	7578	631	G	A	0.020709		0.849	(0.546-1.319)	0.455159		8209	0.7623	(0.443-1.311)	0.326262	0.9384	(0.752-1.17)	0.571591
rs7195624	16	9010213	BARD1	7560	631	C	A	0.296301		1.083	(0.951-1.232)	0.197809		8191	1.114	(0.952-1.302)	0.176379	1.022	(0.955-1.092)	0.525134
rs2023671	16	15834360	SPEG:GMPPA:ACCN4:CHPF:TMEM198:MIR3132:OBSL1:INHA	7575	631	A	C	0.265111		1.065	(0.933-1.214)	0.383039		8206	1.065	(0.910-1.246)	0.431939	1.007	(0.940-1.079)	0.838466
rs16947165	16	78159277	HSD17B12	7580	631	A	G	0.305079		0.999	(0.875-1.14)	0.912004		8211	1.009	(0.862-1.181)	0.909862	1.003	(0.938-1.071)	0.93891
rs9927946	16	9083367	RYK	7579	630	A	G	0.440979		0.894	(0.791-1.01)	0.0797725		8209	0.8852	(0.765-1.023)	0.0993685	0.9826	(0.922-1.046)	0.582629
rs1061621	16	1376892	UBE2I	7558	630	G	A	0.16		0.995	(0.851-1.164)	0.926		8188	1.004	(0.826-1.219)	0.970	1.094	(1.009-1.187)	0.029
rs4785722	16	89863110	ZNF276	7578	631	A	G	0.29		0.941	(0.825-1.073)	0.346		8209	0.8379	(0.714-0.982)	0.029	0.934	(0.873-0.998)	0.043
rs6500437	16	89789898	ZNF276	7300	604	A	G	0.28		0.915	(0.800-1.048)	0.16		7904	0.8442	(0.716-0.995)	0.043	0.94	(0.878-1.006)	0.073
rs8079273	17	7597478		7580	631	G	A	0.0146145		NA	(NA-NA)	0.477092		8211	1.028	(0.558-1.894)	0.928589	1.185	(0.915-1.533)	0.196591
rs3826392	17	11922904	BIVM:ERCC5:LOC121952	7578	631	A	C	0.247655		0.921	(0.799-1.06)	0.194601		8209	0.9322	(0.788-1.102)	0.411497	1.036	(0.965-1.111)	0.322947
rs8066463	17	61818390	MANBA	7579	631	A	G	0.323021		1.072	(0.945-1.215)	0.183452		8210	1.033	(0.888-1.201)	0.670681	0.9671	(0.908-1.03)	0.295675
rs4252596	17	37855834	ALPL:RAP1GAP	7580	631	C	A	0.134636		1.124	(0.950-1.329)	0.226108		8211	1.199	(0.987-1.455)	0.066941	1.072	(0.980-1.171)	0.126277
rs2078486	17	62007498	BARD1	7579	631	G	A	0.0720463		1.056	(0.843-1.322)	0.699621		8210	1.119	(0.859-1.457)	0.403271	1.064	(0.949-1.192)	0.283509
rs2070776	17	58144665	STK38L:ARNTL2	7573	630	G	A	0.33951		1.079	(0.949-1.226)	0.172996		8203	1.003	(0.860-1.17)	0.965166	0.9757	(0.917-1.038)	0.43333
rs17734	17	1801144	CIT	7569	631	A	G	0.410732		0.9137	(0.810-1.03)	0.112515		8200	0.899	(0.779-1.037)	0.142934	0.9638	(0.906-1.025)	0.238872
rs9911630	17	41188342	APAF1:ANKS1B	7580	631	A	G	0.343076		0.895	(0.792-1.011)	0.0671002		8211	0.8985	(0.774-1.042)	0.156424	1.013	(0.950-1.079)	0.698286
rs4794136	17	48433958	C10orf84	7577	630	A	G	0.482576		0.969	(0.862-1.088)	0.604252		8207	1.016	(0.884-1.167)	0.826646	1.014	(0.953-1.078)	0.657326
rs3027247	17	64788644	IRS1:RHBDD1	7576	630	A	C	0.294053		0.954	(0.839-1.084)	0.480278		8206	0.8921	(0.768-1.035)	0.132456	0.9966	(0.933-1.064)	0.919337
rs17817865	17	53032425	TXNRD2:COMT:ARVCF	7580	631	G	A	0.27658		1.07	(0.937-1.221)	0.337107		8211	1.126	(0.959-1.322)	0.147453	1.027	(0.959-1.099)	0.445369
rs17761467	17	1805677	38047	7580	631	G	A	0.173121		0.99	(0.848-1.155)	0.850691		8211	1.004	(0.837-1.204)	0.96361	1.012	(0.934-1.095)	0.776501
rs2239680	17	76219783	DHX29:SKIV2L2	7579	630	A	G	0.27549		0.828	(0.722-0.948)	0.00662285		8209	0.7974	(0.675-0.941)	0.0074717	0.9836	(0.919-1.053)	0.632492
rs2278637	17	8062102	SNAR-A9:NUCB1:DHDH:BAX:FTL:GYS1:RUVBL2	7571	631	A	C	0.347293		1.009	(0.889-1.144)	0.929061		8202	0.9907	(0.856-1.146)	0.89977	0.991	(0.93-1.056)	0.780702
rs12952884	17	49226051	MRPL36:NDUFS6	7513	627	G	A	0.393612		0.9795	(0.867-1.106)	0.84203		8140	1.005	(0.870-1.161)	0.94192	0.9969	(0.936-1.061)	0.921696
rs2287498	17	7592560	TP53/WRAP53	7580	631	G	A	0.07		1.042	(0.830-1.308)	0.787		8211	1.096	(0.838-1.433)	0.502	1.063	(0.947-1.192)	0.301
rs9319956	18	57594068	C8ORFK29:FBXL6:GPR172A:ADCK5:CPSF1:MIR939:MIR1234:SLC39A4:VPS28:TONSL	7579	631	A	C	0.466626		0.968	(0.859-1.09)	0.535542		8210	0.9058	(0.784-1.046)	0.178326	1.042	(0.979-1.108)	0.193467
rs12966424	18	12678486	HSD17B12	7579	631	A	G	0.444823		1.021	(0.907-1.148)	0.797139		8210	0.9856	(0.856-1.135)	0.840346	1.03	(0.968-1.095)	0.352157
rs7234479	18	48405172	TSPAN1:POMGNT1:C1orf190:RAD54L	7580	631	A	C	0.125929		1.103	(0.931-1.306)	0.269212		8211	1.194	(0.980-1.454)	0.0779469	0.9735	(0.890-1.064)	0.554007
rs9304261	18	20606596	ZNF517:ZNF7:COMMD5:ZNF250	7572	631	G	A	0.209131		0.953	(0.822-1.104)	0.481914		8203	0.9391	(0.784-1.124)	0.494352	1.015	(0.943-1.091)	0.694503
rs13381022	18	18532756	TK1:AFMID:BIRC5:EPR1:LOC283999	7573	631	A	G	0.00944661		0.7693	(0.382-1.546)	0.457394		8204	0.7849	(0.345-1.782)	0.562753	0.9746	(0.698-1.36)	0.879748
rs6567131	18	57579140	Intergenic	7577	630	C	G	0.45		0.989	(0.876-1.114)	0.788		8207	0.9499	(0.821-1.099)	0.489	1.051	(0.988-1.117)	0.114
rs11082221	18	20531677	RBBP8	7580	631	A	G	0.04		1.192	(0.894-1.588)	0.240		8211	1.284	(0.902-1.828)	0.164	1.032	(0.877-1.214)	0.706
rs1805419	19	49459104	TBC1D22B:RNF8	7578	630	G	A	0.266204		1.142	(0.999-1.305)	0.070381		8208	1.193	(1.014-1.402)	0.0328755	1.095	(1.021-1.174)	0.0114331
rs7247515	19	20599564	MUC6:MUC2	7574	629	G	A	0.0800317		1.054	(0.858-1.293)	0.621013		8203	1.08	(0.838-1.39)	0.550886	1.096	(0.980-1.225)	0.107201
rs16963425	19	30340724	HLA-DQA2:HLA-DQB2:HLA-DOB:TAP2	7573	630	G	A	0.263501		1.054	(0.927-1.199)	0.469246		8203	1.059	(0.905-1.238)	0.474513	1.051	(0.980-1.126)	0.162131
rs17294094	19	48720926	CDC25A	7579	631	A	G	0.444702		0.8893	(0.790-1.001)	0.0544728		8210	0.9199	(0.795-1.064)	0.261175	1.024	(0.963-1.088)	0.444247
rs3817074	19	49459212	KIAA1045:DNAJB5:C9orf131	7579	631	G	A	0.117722		1.139	(0.956-1.356)	0.190285		8210	1.084	(0.872-1.345)	0.466334	1.044	(0.95-1.148)	0.370349
rs2298881	19	45926916		7554	628	C	A	0.107125		1.105	(0.921-1.325)	0.295872		8182	1.12	(0.893-1.403)	0.326912	1.041	(0.944-1.146)	0.420747
rs3764640	19	1207238	WISP3:TUBE1:C6orf225	7571	631	C	A	0.228176		1.036	(0.902-1.189)	0.639617		8202	1.092	(0.924-1.29)	0.298583	1.027	(0.956-1.103)	0.46721
rs751731	19	33463058	BAK1:GGNBP1:C6orf227	7578	631	G	A	0.29626		0.9251	(0.807-1.06)	0.260012		8209	0.9485	(0.805-1.117)	0.527131	0.9824	(0.920-1.049)	0.594105
rs6060446	20	30231637	PTPN22:BCL2L15:AP4B1:DCLRE1B:HIPK1	7579	630	A	G	0.207333		0.9986	(0.861-1.158)	0.986105		8209	0.9449	(0.788-1.132)	0.53798	0.9355	(0.869-1.007)	0.0757174
rs2422978	20	4763108	TFDP1:ATP4B	7576	631	A	G	0.268795		1.005	(0.879-1.149)	0.974844		8207	1.045	(0.889-1.227)	0.595031	1.062	(0.993-1.135)	0.0753463
rs6086987	20	9685155	ZNF334:C20orf123:SLC13A3	7553	629	A	G	0.0977145		0.9112	(0.739-1.123)	0.454989		8182	0.8396	(0.652-1.08)	0.174143	1.038	(0.936-1.15)	0.4766
rs85021	20	45179495	PTP4A3:FLJ43860	7580	631	A	G	0.351297		0.9766	(0.861-1.107)	0.640369		8211	0.8963	(0.769-1.045)	0.160858	0.9578	(0.898-1.021)	0.184631
rs4813643	20	3787755	CASP8:ALS2CR12	7567	629	A	G	0.421486		0.9341	(0.830-1.05)	0.419138		8196	0.9507	(0.825-1.095)	0.482206	1.024	(0.963-1.088)	0.443542
rs6133777	20	9995950	XRCC5	7580	631	C	A	0.441664		0.9943	(0.882-1.12)	0.995934		8211	0.9589	(0.831-1.106)	0.563424	0.9788	(0.921-1.039)	0.48473
rs2267860	20	43655135	FRY:ZAR1L:BRCA2	7580	631	A	G	0.496407		0.9642	(0.856-1.086)	0.478314		8211	0.9512	(0.825-1.097)	0.4908	1.012	(0.953-1.075)	0.685889
rs910671	20	43601921	MIR1972-2:TMC5:GDE1:CP110	7577	631	C	A	0.499635		0.9585	(0.850-1.08)	0.420512		8208	0.9383	(0.814-1.082)	0.379757	1.008	(0.95-1.07)	0.783932
rs16979815	20	54941087	ALOXE3:HES7:PER1:VAMP2:TMEM107:MIR3676:C17orf59:AURKB	7579	631	G	A	0.171681		1.111	(0.949-1.301)	0.209296		8210	1.109	(0.913-1.346)	0.29689	0.9928	(0.917-1.074)	0.858321
rs4239838	21	46202309	MIR1972-2:NDUFAB1:PALB2:DCTN5:PLK1	7576	631	A	G	0.434385		1.121	(0.995-1.263)	0.0649837		8207	1.02	(0.881-1.18)	0.789813	1.022	(0.961-1.086)	0.482396
rs2838690	21	162781787	METTL6:EAF1:COLQ	7579	630	G	A	0.169509		0.9695	(0.826-1.138)	0.701759		8209	0.9994	(0.825-1.211)	0.995205	1.011	(0.932-1.095)	0.795581
rs235314	21	46271452	AP4B1:DCLRE1B:HIPK1:OLFML3	7576	631	A	G	0.470818		0.9656	(0.857-1.087)	0.57873		8207	1.04	(0.899-1.201)	0.597606	0.9982	(0.940-1.06)	0.953987
rs2838693	21	46222486	PRNT:RASSF2	7574	631	C	A	0.114747		0.9569	(0.797-1.149)	0.703439		8205	0.9177	(0.736-1.143)	0.44341	0.9857	(0.898-1.082)	0.762054
rs104664	22	45711854	CCND1:ORAOV1:FGF19	7580	631	A	G	0.127451		1.11	(0.937-1.314)	0.198495		8211	1.001	(0.816-1.227)	0.993837	0.9324	(0.851-1.021)	0.131245
rs9607761	22	41371418		7579	631	A	T	0.000426309		NA	(NA-NA)	0.594762		NA	NA	(NA-NA)	NA	NA	(NA-NA)	NA
rs738200	22	28792887	DOCK3:MANF:RBM15B:VPRBP	7578	631	G	A	0.0789378		1.006	(0.805-1.256)	0.840822		8209	1.103	(0.853-1.426)	0.455091	1.08	(0.964-1.211)	0.18363
rs9332362	22	19949103	C9orf53:CDKN2A:CDKN2B-AS1:CDKN2B	7572	628	G	A	0.027561		0.8921	(0.612-1.299)	0.645478		8200	0.9917	(0.653-1.505)	0.968699	0.8789	(0.732-1.054)	0.164113
rs4822011	22	41550954	TMED2:DDX55:EIF2B1:GTF2H3:TCTN2	7577	631	A	G	0.378168		0.9707	(0.862-1.093)	0.632641		8208	0.9413	(0.814-1.088)	0.413685	1.023	(0.961-1.088)	0.472817
rs738207	22	35829452	UBE3B:MMAB:MVK	7577	631	G	A	0.213999		0.8513	(0.727-0.996)	0.0507149		8208	0.8744	(0.725-1.054)	0.158279	0.9641	(0.896-1.037)	0.328104
rs181390	22	18222263	ROCK1	7578	630	G	A	0.326998		1.051	(0.929-1.188)	0.457226		8208	1.069	(0.920-1.241)	0.381559	1.026	(0.962-1.094)	0.431318
rs5762814	22	29203964	MSH2:KCNK12	7579	631	G	A	0.137637		1.11	(0.934-1.318)	0.238115		8210	1.023	(0.827-1.265)	0.830672	0.9879	(0.902-1.081)	0.792639
rs740603	22	19945177	NEK2	7577	630	G	A	0.447545		1.019	(0.904-1.147)	0.628838		8207	1.088	(0.942-1.257)	0.250899	1.012	(0.952-1.076)	0.689862
rs9605031	22	19921378	LOC100294145:HLA-DMB:HLA-DMA:BRD2	7576	631	G	A	0.308822		0.9779	(0.861-1.111)	0.670998		8207	0.8995	(0.771-1.049)	0.176072	0.9913	(0.929-1.058)	0.791104
