# Supplementary material for: Association of breast cancer risk in BRCA1 and BRCA2 mutation carriers with genetic variants showing differential allelic expression: identification of a modifier of breast cancer risk at locus 11q22.3
Source: Breast Cancer Res Treat. 2016 Oct 28;161(1):117–34. doi: 10.1007/s10549-016-4018-2 (PMC5222911; doi:10.1007/s10549-016-4018-2)
Supplement: Supplementary file 6 — Supplementary material 6 (XLSX 383 kb) [file 10549_2016_4018_MOESM6_ESM.xlsx]

## Sheet: BRCA1
Online Resource 6a. Associations for imputed and genotyped SNPs in the BRCA1 mutation carriers loci (p<10-2) for overall breast cancer risk.
SNP	Locus	Position	Reference_Allele	Effect_Allele	EAF	r2	BC_logHR	BC_SE	BC_HR	95% CI	P-value
rs7555278	1q42.13	227352915	C	T	0.859	0.918	-0.096	0.03	0.908	(0.857-0.963)	0.001
rs2313499	1q42.13	227341898	G	A	0.855	0.927	-0.093	0.029	0.911	(0.861-0.964)	0.002
rs4595342	1q42.13	227343900	A	G	0.855	0.927	-0.093	0.029	0.911	(0.861-0.964)	0.002
chr1:227314181:I	1q42.13	227314181	G	GA	0.073	0.935	0.126	0.04	1.134	(1.049-1.227)	0.002
rs7416327	1q42.13	227346060	G	C	0.856	0.925	-0.093	0.03	0.911	(0.859-0.966)	0.002
rs76671459	1q42.13	227354597	G	A	0.071	0.865	0.131	0.042	1.14	(1.05-1.238)	0.002
rs6426571	1q42.13	227349151	A	T	0.852	0.911	-0.091	0.029	0.913	(0.863-0.966)	0.002
rs11804807	1q42.13	227354001	C	A	0.063	0.922	0.134	0.043	1.143	(1.051-1.244)	0.002
rs77599485	1q42.13	227352195	T	C	0.062	0.926	0.131	0.043	1.14	(1.048-1.24)	0.002
rs77755024	1q42.13	227357784	T	A	0.062	0.926	0.131	0.043	1.14	(1.048-1.24)	0.002
rs74877892	1q42.13	227355545	T	C	0.062	0.926	0.131	0.043	1.14	(1.048-1.24)	0.003
rs11802399	1q42.13	227353753	T	C	0.062	0.926	0.131	0.043	1.14	(1.048-1.24)	0.003
rs11800364	1q42.13	227353932	T	C	0.062	0.926	0.131	0.043	1.14	(1.048-1.24)	0.003
rs77220222	1q42.13	227342972	G	T	0.066	0.947	0.123	0.042	1.131	(1.042-1.228)	0.003
rs11801012	1q42.13	227350198	T	C	0.066	0.947	0.123	0.042	1.131	(1.042-1.228)	0.003
rs115642381	1q42.13	227341823	C	T	0.05	0.942	0.14	0.048	1.15	(1.047-1.264)	0.003
rs79611117	1q42.13	227339435	A	G	0.066	0.95	0.122	0.042	1.13	(1.04-1.227)	0.003
rs11810440	1q42.13	227267402	T	A	0.064	0.978	0.122	0.042	1.13	(1.04-1.227)	0.004
rs138200352	1q42.13	227272090	G	A	0.063	0.982	0.122	0.042	1.13	(1.04-1.227)	0.004
rs74782247	1q42.13	227275946	T	C	0.063	0.982	0.122	0.042	1.13	(1.04-1.227)	0.004
chr1:227318172:D	1q42.13	227318172	GTATT	G	0.065	0.978	0.12	0.041	1.127	(1.04-1.222)	0.004
rs75213165	1q42.13	227280520	T	C	0.063	0.982	0.121	0.042	1.129	(1.039-1.225)	0.004
rs74840653	1q42.13	227281814	A	C	0.063	0.982	0.121	0.042	1.129	(1.039-1.225)	0.004
rs74475302	1q42.13	227319072	A	G	0.065	0.978	0.12	0.041	1.127	(1.04-1.222)	0.004
rs75714930	1q42.13	227318676	T	C	0.065	0.978	0.12	0.041	1.127	(1.04-1.222)	0.004
rs76599385	1q42.13	227318924	A	T	0.065	0.978	0.12	0.041	1.127	(1.04-1.222)	0.004
rs115332333	1q42.13	227329006	G	A	0.066	0.956	0.119	0.042	1.126	(1.037-1.223)	0.004
rs41268743	1q42.13	227327527	T	C	0.066	0.956	0.119	0.042	1.126	(1.037-1.223)	0.004
rs41268741	1q42.13	227327502	G	A	0.066	0.956	0.119	0.042	1.126	(1.037-1.223)	0.004
rs190404486	1q42.13	227321013	G	A	0.066	0.956	0.119	0.041	1.126	(1.039-1.221)	0.004
rs76897971	1q42.13	227328388	G	C	0.066	0.956	0.119	0.042	1.126	(1.037-1.223)	0.004
rs75714085	1q42.13	227325816	C	A	0.066	0.956	0.119	0.042	1.126	(1.037-1.223)	0.004
rs145722452	1q42.13	227323304	C	T	0.066	0.956	0.119	0.042	1.126	(1.037-1.223)	0.004
rs11799389	1q42.13	227323787	G	A	0.066	0.956	0.119	0.042	1.126	(1.037-1.223)	0.004
rs79766410	1q42.13	227289103	T	C	0.065	0.994	0.117	0.041	1.124	(1.037-1.218)	0.004
rs2221931	1q42.13	227350074	T	C	0.717	0.93	-0.065	0.023	0.937	(0.896-0.98)	0.004
rs79655227	1q42.13	227285708	T	C	0.065	0.992	0.117	0.041	1.124	(1.037-1.218)	0.004
rs78707784	1q42.13	227286400	T	C	0.065	0.992	0.117	0.041	1.124	(1.037-1.218)	0.004
rs77464064	1q42.13	227301610	C	T	0.065	0.998	0.117	0.041	1.124	(1.037-1.218)	0.004
rs78061959	1q42.13	227303004	T	C	0.065	0.998	0.117	0.041	1.124	(1.037-1.218)	0.004
rs78944317	1q42.13	227307861	A	T	0.065	0.998	0.117	0.041	1.124	(1.037-1.218)	0.004
rs114967166	1q42.13	227288330	G	A	0.065	0.993	0.117	0.041	1.124	(1.037-1.218)	0.004
rs138321874	1q42.13	227283520	T	C	0.065	0.991	0.117	0.041	1.124	(1.037-1.218)	0.004
chr1:227295148:I	1q42.13	227295148	G	GTC	0.065	0.996	0.117	0.041	1.124	(1.037-1.218)	0.004
rs78292385	1q42.13	227295064	T	C	0.065	0.996	0.117	0.041	1.124	(1.037-1.218)	0.004
rs7418070	1q42.13	227346480	C	T	0.717	0.93	-0.065	0.023	0.937	(0.896-0.98)	0.004
chr1:227295740:D	1q42.13	227295740	CAACT	C	0.065	0.996	0.116	0.041	1.123	(1.036-1.217)	0.004
rs1996133	1q42.13	227342582	C	T	0.717	0.929	-0.065	0.023	0.937	(0.896-0.98)	0.004
rs1546556	1q42.13	227347468	C	G	0.717	0.929	-0.065	0.023	0.937	(0.896-0.98)	0.005
rs116389194	1q42.13	227302921	T	C	0.065	0.997	0.116	0.041	1.123	(1.036-1.217)	0.005
chr1:227297923:D	1q42.13	227297923	TTC	T	0.065	0.997	0.116	0.041	1.123	(1.036-1.217)	0.005
chr1:227297927:D	1q42.13	227297927	CTCTT	C	0.065	0.997	0.116	0.041	1.123	(1.036-1.217)	0.005
rs7535648	1q42.13	227306556	C	T	0.065	0.998	0.116	0.041	1.123	(1.036-1.217)	0.005
rs2999725	1q42.13	227321057	C	G	0.117	0.933	0.091	0.032	1.095	(1.029-1.166)	0.005
rs11806633	1q42.13	227308416	T	C	0.065	1	0.115	0.041	1.122	(1.035-1.216)	0.005
rs114312101	1q42.13	227303589	T	A	0.064	0.988	0.116	0.042	1.123	(1.034-1.219)	0.005
chr1:227343831:D	1q42.13	227343831	TG	T	0.7	0.893	-0.064	0.023	0.938	(0.897-0.981)	0.005
chr1:227318847:I	1q42.13	227318847	C	CA	0.118	0.953	0.089	0.032	1.093	(1.027-1.164)	0.005
rs115823838	1q42.13	227303587	C	T	0.063	0.988	0.115	0.042	1.122	(1.033-1.218)	0.006
chr1:227352755:I	1q42.13	227352755	C	CA	0.71	0.928	-0.063	0.023	0.939	(0.898-0.982)	0.006
rs78220690	1q42.13	227297523	T	C	0.064	0.989	0.113	0.041	1.12	(1.033-1.213)	0.006
rs77168416	1q42.13	227321838	T	G	0.064	0.949	0.116	0.042	1.123	(1.034-1.219)	0.006
rs2175789	1q42.13	227354535	C	T	0.843	0.891	-0.079	0.029	0.924	(0.873-0.978)	0.006
rs6675599	1q42.13	227333055	A	G	0.883	0.95	-0.087	0.032	0.917	(0.861-0.976)	0.006
rs16846989	1q42.13	227264559	T	C	0.122	0.971	0.085	0.031	1.089	(1.025-1.157)	0.007
chr1:227271792:D	1q42.13	227271792	GACT	G	0.115	0.966	0.087	0.032	1.091	(1.025-1.162)	0.007
rs7538743	1q42.13	227310576	T	A	0.117	0.967	0.086	0.032	1.09	(1.024-1.16)	0.007
rs9426607	1q42.13	227311738	A	C	0.117	0.966	0.086	0.032	1.09	(1.024-1.16)	0.007
rs7365134	1q42.13	227329226	T	C	0.883	0.952	-0.086	0.032	0.918	(0.862-0.977)	0.007
rs10799389	1q42.13	227328073	A	G	0.883	0.952	-0.086	0.032	0.918	(0.862-0.977)	0.007
rs10458373	1q42.13	227325008	T	C	0.883	0.952	-0.086	0.032	0.918	(0.862-0.977)	0.007
rs6426576	1q42.13	227355868	C	T	0.713	0.932	-0.061	0.023	0.941	(0.899-0.984)	0.007
rs6700338	1q42.13	227322506	C	T	0.883	0.952	-0.086	0.032	0.918	(0.862-0.977)	0.007
rs9426601	1q42.13	227292178	A	G	0.117	0.966	0.085	0.032	1.089	(1.023-1.159)	0.008
rs78574598	1q42.13	227276514	C	T	0.109	0.975	0.087	0.033	1.091	(1.023-1.164)	0.008
rs2102631	1q42.13	227356635	C	T	0.715	0.936	-0.061	0.023	0.941	(0.899-0.984)	0.008
chr1:227267706:D	1q42.13	227267706	AT	A	0.116	0.972	0.084	0.032	1.088	(1.022-1.158)	0.008
rs7540463	1q42.13	227351287	G	A	0.715	0.936	-0.061	0.023	0.941	(0.899-0.984)	0.008
rs6426573	1q42.13	227351712	T	G	0.715	0.936	-0.061	0.023	0.941	(0.899-0.984)	0.008
rs9426605	1q42.13	227302833	C	T	0.117	0.974	0.084	0.032	1.088	(1.022-1.158)	0.008
rs572561	1q42.13	227309556	C	T	0.117	0.976	0.084	0.032	1.088	(1.022-1.158)	0.008
rs7549822	1q42.13	227354223	G	T	0.713	0.927	-0.061	0.023	0.941	(0.899-0.984)	0.008
rs676009	1q42.13	227308339	T	C	0.117	0.977	0.084	0.032	1.088	(1.022-1.158)	0.008
rs508769	1q42.13	227297164	C	T	0.117	0.976	0.084	0.032	1.088	(1.022-1.158)	0.008
rs6426575	1q42.13	227352165	A	G	0.715	0.936	-0.06	0.023	0.942	(0.9-0.985)	0.008
rs693735	1q42.13	227294024	T	C	0.117	0.975	0.084	0.032	1.088	(1.022-1.158)	0.008
rs9426540	1q42.13	227285815	C	T	0.117	0.974	0.083	0.032	1.087	(1.02-1.157)	0.008
rs545171	1q42.13	227286814	C	T	0.117	0.974	0.083	0.032	1.087	(1.02-1.157)	0.008
rs621797	1q42.13	227285127	T	C	0.117	0.974	0.083	0.032	1.087	(1.02-1.157)	0.008
rs530057	1q42.13	227282351	G	A	0.117	0.974	0.083	0.032	1.087	(1.02-1.157)	0.008
rs11801093	1q42.13	227279904	T	C	0.117	0.974	0.083	0.032	1.087	(1.02-1.157)	0.008
rs12142938	1q42.13	227337857	T	C	0.88	0.935	-0.084	0.032	0.919	(0.864-0.979)	0.009
chr1:227271793:D	1q42.13	227271793	ACTT	A	0.117	0.976	0.083	0.032	1.087	(1.02-1.157)	0.009
chr1:227356809:D	1q42.13	227356809	AG	A	0.712	0.928	-0.06	0.023	0.942	(0.9-0.985)	0.009
rs1818491	1q42.13	227308579	G	A	0.117	0.976	0.083	0.032	1.087	(1.02-1.157)	0.009
rs1929870	1q42.13	227263094	C	G	0.117	0.978	0.083	0.032	1.087	(1.02-1.157)	0.009
rs10495264	1q42.13	227259652	T	C	0.117	0.978	0.083	0.032	1.087	(1.02-1.157)	0.009
rs3122331	1q42.13	227319980	C	T	0.117	0.959	0.083	0.032	1.087	(1.02-1.157)	0.009
rs11808903	1q42.13	227259170	A	G	0.117	0.977	0.083	0.032	1.087	(1.02-1.157)	0.009
rs16846942	1q42.13	227258602	G	A	0.117	0.977	0.083	0.032	1.087	(1.02-1.157)	0.009
chr1:227271244:D	1q42.13	227271244	TTTTTGA	T	0.117	0.978	0.082	0.032	1.085	(1.019-1.156)	0.009
chr1:227297075:I	1q42.13	227297075	C	CT	0.122	0.958	0.081	0.031	1.084	(1.02-1.152)	0.009
rs7520364	1q42.13	227356493	C	T	0.717	0.932	-0.059	0.023	0.943	(0.901-0.986)	0.011
rs620991	1q42.13	227285244	T	G	0.118	0.971	0.08	0.032	1.083	(1.017-1.153)	0.011
rs76341156	1q42.13	227270343	T	G	0.257	0.889	0.061	0.024	1.063	(1.014-1.114)	0.012
rs7556248	1q42.13	227320893	T	C	0.839	0.827	-0.075	0.03	0.928	(0.875-0.984)	0.012
chr1:227267647:I	1q42.13	227267647	T	TG	0.238	0.882	0.063	0.025	1.065	(1.014-1.119)	0.012
rs11799547	1q42.13	227272139	A	G	0.257	0.941	0.058	0.024	1.06	(1.011-1.111)	0.013
chr1:227275091:I	1q42.13	227275091	C	CTTCAT	0.255	0.934	0.058	0.024	1.06	(1.011-1.111)	0.014
rs558921	1q42.13	227316032	T	C	0.253	0.932	0.058	0.024	1.06	(1.011-1.111)	0.014
rs111963380	1q42.13	227270318	A	G	0.12	0.955	0.078	0.032	1.081	(1.015-1.151)	0.014
rs10799393	1q42.13	227340036	T	C	0.746	0.935	-0.058	0.024	0.944	(0.9-0.989)	0.015
rs664815	1q42.13	227291493	A	G	0.258	0.942	0.056	0.024	1.058	(1.009-1.109)	0.016
rs10799395	1q42.13	227340673	A	T	0.744	0.938	-0.057	0.024	0.945	(0.901-0.99)	0.017
rs10799394	1q42.13	227340663	G	A	0.744	0.938	-0.057	0.024	0.945	(0.901-0.99)	0.017
rs595932	1q42.13	227312012	A	G	0.258	0.939	0.056	0.024	1.058	(1.009-1.109)	0.017
rs6685830	1q42.13	227335801	A	G	0.743	0.936	-0.056	0.024	0.946	(0.902-0.991)	0.017
rs10799392	1q42.13	227336722	A	C	0.743	0.936	-0.056	0.024	0.946	(0.902-0.991)	0.017
rs2313598	1q42.13	227355731	T	G	0.699	0.9	-0.055	0.023	0.946	(0.905-0.99)	0.017
rs6426569	1q42.13	227332749	C	A	0.743	0.936	-0.056	0.024	0.946	(0.902-0.991)	0.017
rs484150	1q42.13	227317593	A	G	0.256	0.94	0.056	0.024	1.058	(1.009-1.109)	0.017
rs489565	1q42.13	227310207	C	T	0.256	0.94	0.056	0.024	1.058	(1.009-1.109)	0.017
rs555690	1q42.13	227312868	C	T	0.256	0.94	0.056	0.024	1.058	(1.009-1.109)	0.017
rs2813972	1q42.13	227311690	G	A	0.256	0.94	0.056	0.024	1.058	(1.009-1.109)	0.017
rs602521	1q42.13	227311066	G	A	0.256	0.94	0.056	0.024	1.058	(1.009-1.109)	0.017
rs7531576	1q42.13	227310644	C	T	0.256	0.94	0.056	0.024	1.058	(1.009-1.109)	0.017
rs490517	1q42.13	227310307	A	T	0.256	0.94	0.056	0.024	1.058	(1.009-1.109)	0.017
rs596131	1q42.13	227309961	A	G	0.257	0.941	0.056	0.024	1.058	(1.009-1.109)	0.018
rs7524042	1q42.13	227331527	A	T	0.743	0.935	-0.056	0.024	0.946	(0.902-0.991)	0.018
rs12139502	1q42.13	227330759	A	G	0.743	0.935	-0.056	0.024	0.946	(0.902-0.991)	0.018
rs597007	1q42.13	227310126	G	A	0.257	0.94	0.056	0.024	1.058	(1.009-1.109)	0.018
rs10916093	1q42.13	227330269	T	C	0.743	0.934	-0.056	0.024	0.946	(0.902-0.991)	0.018
rs7517646	1q42.13	227323154	T	C	0.743	0.935	-0.056	0.024	0.946	(0.902-0.991)	0.018
rs7367807	1q42.13	227329231	G	A	0.743	0.935	-0.056	0.024	0.946	(0.902-0.991)	0.018
rs6690771	1q42.13	227322576	G	C	0.743	0.935	-0.056	0.024	0.946	(0.902-0.991)	0.018
rs6695787	1q42.13	227328743	G	T	0.743	0.935	-0.056	0.024	0.946	(0.902-0.991)	0.018
rs6700137	1q42.13	227322369	C	T	0.743	0.935	-0.056	0.024	0.946	(0.902-0.991)	0.018
rs526290	1q42.13	227304971	C	T	0.257	0.942	0.055	0.024	1.057	(1.008-1.107)	0.018
rs10458378	1q42.13	227325014	A	G	0.743	0.934	-0.056	0.024	0.946	(0.902-0.991)	0.018
rs7524731	1q42.13	227325609	T	A	0.743	0.935	-0.056	0.024	0.946	(0.902-0.991)	0.018
rs9426606	1q42.13	227304062	T	C	0.258	0.942	0.055	0.024	1.057	(1.008-1.107)	0.018
rs6672658	1q42.13	227325897	T	C	0.743	0.935	-0.056	0.024	0.946	(0.902-0.991)	0.018
rs2458521	1q42.13	227299978	C	T	0.258	0.942	0.055	0.024	1.057	(1.008-1.107)	0.018
rs650376	1q42.13	227298554	T	C	0.258	0.942	0.055	0.024	1.057	(1.008-1.107)	0.018
rs2492629	1q42.13	227286909	G	T	0.258	0.942	0.055	0.024	1.057	(1.008-1.107)	0.018
rs4373720	1q42.13	227295572	G	T	0.258	0.942	0.055	0.024	1.057	(1.008-1.107)	0.019
chr1:227319751:D	1q42.13	227319751	ACT	A	0.251	0.924	0.056	0.024	1.058	(1.009-1.109)	0.019
rs583729	1q42.13	227296300	T	C	0.258	0.942	0.055	0.024	1.057	(1.008-1.107)	0.019
chr1:227270851:I	1q42.13	227270851	A	ATC	0.256	0.94	0.056	0.024	1.058	(1.009-1.109)	0.019
chr1:227270859:I	1q42.13	227270859	C	CTT	0.256	0.94	0.056	0.024	1.058	(1.009-1.109)	0.019
rs9426603	1q42.13	227293210	A	G	0.258	0.942	0.055	0.024	1.057	(1.008-1.107)	0.019
rs9426602	1q42.13	227292288	T	C	0.258	0.942	0.055	0.024	1.057	(1.008-1.107)	0.019
rs647702	1q42.13	227289913	G	A	0.258	0.942	0.055	0.024	1.057	(1.008-1.107)	0.019
rs529430	1q42.13	227289734	C	G	0.258	0.942	0.055	0.024	1.057	(1.008-1.107)	0.019
rs497291	1q42.13	227289078	A	G	0.258	0.942	0.055	0.024	1.057	(1.008-1.107)	0.019
rs666559	1q42.13	227291840	T	G	0.258	0.942	0.055	0.024	1.057	(1.008-1.107)	0.019
rs2458520	1q42.13	227287863	C	T	0.258	0.942	0.055	0.024	1.057	(1.008-1.107)	0.019
rs2482452	1q42.13	227286878	G	A	0.258	0.942	0.055	0.024	1.057	(1.008-1.107)	0.019
rs621874	1q42.13	227285075	T	C	0.258	0.942	0.055	0.024	1.057	(1.008-1.107)	0.019
rs667621	1q42.13	227281715	C	G	0.258	0.942	0.055	0.024	1.057	(1.008-1.107)	0.019
rs4653787	1q42.13	227280087	T	C	0.258	0.942	0.055	0.024	1.057	(1.008-1.107)	0.019
rs6681424	1q42.13	227271194	C	G	0.258	0.943	0.055	0.023	1.057	(1.01-1.105)	0.019
rs1929853	1q42.13	227268488	T	G	0.258	0.943	0.055	0.023	1.057	(1.01-1.105)	0.020
rs12410431	1q42.13	227269217	A	G	0.258	0.943	0.055	0.023	1.057	(1.01-1.105)	0.020
rs11810506	1q42.13	227267755	T	C	0.258	0.943	0.055	0.023	1.057	(1.01-1.105)	0.020
rs73093498	1q42.13	227274518	A	G	0.258	0.943	0.055	0.023	1.057	(1.01-1.105)	0.020
rs6426565	1q42.13	227278564	C	T	0.258	0.943	0.055	0.023	1.057	(1.01-1.105)	0.020
rs11804358	1q42.13	227272373	C	T	0.258	0.943	0.055	0.023	1.057	(1.01-1.105)	0.020
rs4653478	1q42.13	227265831	A	T	0.258	0.943	0.055	0.023	1.057	(1.01-1.105)	0.020
rs2225508	1q42.13	227262890	T	G	0.258	0.943	0.055	0.023	1.057	(1.01-1.105)	0.020
rs11799444	1q42.13	227277397	A	G	0.258	0.943	0.055	0.023	1.057	(1.01-1.105)	0.020
rs11800897	1q42.13	227277276	G	A	0.258	0.943	0.055	0.023	1.057	(1.01-1.105)	0.020
rs61133665	1q42.13	227260296	A	G	0.258	0.943	0.055	0.023	1.057	(1.01-1.105)	0.020
rs6426564	1q42.13	227278545	G	C	0.258	0.943	0.055	0.023	1.057	(1.01-1.105)	0.020
rs6426563	1q42.13	227278474	C	T	0.258	0.943	0.055	0.023	1.057	(1.01-1.105)	0.020
rs6426561	1q42.13	227278266	T	C	0.253	0.933	0.055	0.024	1.057	(1.008-1.107)	0.020
rs4653481	1q42.13	227338370	A	T	0.74	0.928	-0.055	0.024	0.946	(0.903-0.992)	0.020
rs11808884	1q42.13	227259027	A	G	0.258	0.943	0.055	0.023	1.057	(1.01-1.105)	0.020
rs6426562	1q42.13	227278342	A	T	0.258	0.943	0.055	0.023	1.057	(1.01-1.105)	0.020
rs11800145	1q42.13	227270584	G	A	0.258	0.943	0.055	0.023	1.057	(1.01-1.105)	0.020
rs694370	1q42.13	227288430	C	G	0.263	0.933	0.054	0.023	1.055	(1.009-1.104)	0.021
rs511679	1q42.13	227297542	G	A	0.258	0.942	0.054	0.024	1.055	(1.007-1.106)	0.021
rs11811824	1q42.13	227270410	T	C	0.258	0.943	0.054	0.023	1.055	(1.009-1.104)	0.021
rs6661802	1q42.13	227328967	A	T	0.743	0.934	-0.055	0.024	0.946	(0.903-0.992)	0.021
chr1:227277720:I	1q42.13	227277720	T	TG	0.261	0.934	0.054	0.024	1.055	(1.007-1.106)	0.021
chr1:227272569:D	1q42.13	227272569	TGA	T	0.255	0.937	0.054	0.024	1.055	(1.007-1.106)	0.022
chr1:227350811:D	1q42.13	227350811	ATGTG	A	0.508	0.891	-0.048	0.021	0.953	(0.915-0.993)	0.022
rs78710142	1q42.13	227320948	G	A	0.725	0.863	-0.055	0.024	0.946	(0.903-0.992)	0.023
rs111978396	1q42.13	227270309	A	G	0.238	0.903	0.056	0.025	1.058	(1.007-1.111)	0.023
rs6664251	1q42.13	227339561	G	C	0.746	0.935	-0.054	0.024	0.947	(0.904-0.993)	0.024
rs537004	1q42.13	227315938	T	C	0.254	0.939	0.053	0.024	1.054	(1.006-1.105)	0.025
rs2102632	1q42.13	227320876	C	T	0.708	0.835	-0.052	0.024	0.949	(0.906-0.995)	0.032
chr1:227350841:D	1q42.13	227350841	GTA	G	0.684	0.842	-0.05	0.023	0.951	(0.909-0.995)	0.032
rs6426577	1q42.13	227355918	C	A	0.583	0.956	-0.044	0.021	0.957	(0.918-0.997)	0.034
rs71527037	1q42.13	227321012	C	T	0.649	0.807	-0.049	0.023	0.952	(0.91-0.996)	0.035
rs2482453	1q42.13	227306488	A	G	0.744	0.927	0.049	0.024	1.05	(1.002-1.101)	0.038
rs189865352	1q42.13	227320944	C	T	0.093	0.826	0.077	0.038	1.08	(1.003-1.164)	0.045
rs67798931	1q42.13	227350615	G	T	0.626	0.772	-0.046	0.024	0.955	(0.911-1.001)	0.052
rs3122332	1q42.13	227319904	A	T	0.592	0.728	0.045	0.024	1.046	(0.998-1.096)	0.057
rs72748181	1q42.13	227280734	T	A	0.316	0.975	0.042	0.022	1.043	(0.999-1.089)	0.058
rs871210	1q42.13	227326581	C	T	0.181	0.918	-0.051	0.027	0.95	(0.901-1.002)	0.061
rs58442036	1q42.13	227330783	G	C	0.181	0.918	-0.051	0.027	0.95	(0.901-1.002)	0.061
rs61836477	1q42.13	227325693	C	T	0.181	0.918	-0.051	0.027	0.95	(0.901-1.002)	0.061
rs7536444	1q42.13	227334574	T	C	0.181	0.918	-0.05	0.027	0.951	(0.902-1.003)	0.063
chr1:227269966:D	1q42.13	227269966	CA	C	0.858	0.896	0.056	0.03	1.058	(0.997-1.122)	0.064
rs3122333	1q42.13	227319903	G	C	0.363	0.743	0.045	0.024	1.046	(0.998-1.096)	0.066
rs115789355	1q42.13	227302119	G	T	0.018	0.84	0.15	0.082	1.162	(0.989-1.364)	0.066
rs145000161	1q42.13	227282957	G	A	0.006	0.683	-0.311	0.173	0.733	(0.522-1.028)	0.072
rs10458379	1q42.13	227325273	A	T	0.179	0.91	-0.049	0.027	0.952	(0.903-1.004)	0.073
rs9426547	1q42.13	227321275	C	T	0.151	0.795	0.056	0.031	1.058	(0.995-1.124)	0.075
rs2102633	1q42.13	227320867	C	T	0.736	0.9	-0.042	0.024	0.959	(0.915-1.005)	0.077
rs2104863	1q42.13	227288655	G	A	0.813	0.912	0.047	0.027	1.048	(0.994-1.105)	0.077
chr1:227355355:D	1q42.13	227355355	AG	A	0.176	0.927	-0.048	0.027	0.953	(0.904-1.005)	0.079
rs12741027	1q42.13	227347151	C	G	0.006	0.595	0.301	0.173	1.351	(0.963-1.897)	0.082
rs677596	1q42.13	227313297	A	C	0.79	0.849	0.046	0.027	1.047	(0.993-1.104)	0.082
rs137902129	1q42.13	227356433	C	T	0.017	0.807	0.148	0.087	1.16	(0.978-1.375)	0.087
rs116115643	1q42.13	227260396	T	G	0.016	0.763	0.157	0.092	1.17	(0.977-1.401)	0.088
rs73086792	1q42.13	227355398	T	A	0.014	0.775	-0.17	0.1	0.844	(0.694-1.026)	0.088
chr1:227285971:D	1q42.13	227285971	AT	A	0.085	0.891	0.065	0.038	1.067	(0.991-1.15)	0.090
rs12097121	1q42.13	227341029	A	T	0.18	0.92	-0.046	0.027	0.955	(0.906-1.007)	0.091
rs10916098	1q42.13	227346992	A	G	0.18	0.921	-0.046	0.027	0.955	(0.906-1.007)	0.092
rs482032	1q42.13	227296587	T	G	0.819	0.926	0.045	0.027	1.046	(0.992-1.103)	0.093
rs138590549	1q42.13	227316021	G	A	0.006	0.543	0.309	0.187	1.362	(0.944-1.965)	0.097
rs4653790	1q42.13	227280737	C	A	0.82	0.932	0.044	0.027	1.045	(0.991-1.102)	0.098
rs4653788	1q42.13	227280641	A	G	0.82	0.932	0.044	0.027	1.045	(0.991-1.102)	0.098
rs533134	1q42.13	227290139	G	T	0.82	0.931	0.044	0.027	1.045	(0.991-1.102)	0.099
rs645081	1q42.13	227306048	T	C	0.82	0.93	0.044	0.027	1.045	(0.991-1.102)	0.099
rs688718	1q42.13	227308845	A	C	0.82	0.93	0.044	0.027	1.045	(0.991-1.102)	0.100
rs2458523	1q42.13	227294568	A	G	0.82	0.93	0.044	0.027	1.045	(0.991-1.102)	0.100
chr1:227279326:I	1q42.13	227279326	T	TA	0.811	0.909	0.044	0.027	1.045	(0.991-1.102)	0.100
rs6664803	1q42.13	227295716	C	T	0.82	0.93	0.044	0.027	1.045	(0.991-1.102)	0.101
rs477373	1q42.13	227296082	G	A	0.82	0.93	0.044	0.027	1.045	(0.991-1.102)	0.102
rs567467	1q42.13	227298998	C	T	0.82	0.93	0.044	0.027	1.045	(0.991-1.102)	0.102
rs186631008	1q42.13	227330188	T	C	0.007	0.869	0.202	0.129	1.224	(0.95-1.576)	0.118
rs1949227	1q42.13	227348850	C	T	0.924	0.9	-0.06	0.039	0.942	(0.872-1.017)	0.126
rs2090008	1q42.13	227320577	G	A	0.227	0.909	0.038	0.025	1.039	(0.989-1.091)	0.134
rs595155	1q42.13	227309778	A	G	0.805	0.902	0.039	0.026	1.04	(0.988-1.094)	0.137
rs56221899	1q42.13	227324875	T	C	0.096	0.842	-0.055	0.037	0.946	(0.88-1.018)	0.138
rs17603714	1q42.13	227263016	T	A	0.099	0.885	-0.052	0.036	0.949	(0.885-1.019)	0.142
chr1:227273806:D	1q42.13	227273806	ACTT	A	0.094	0.86	-0.054	0.037	0.947	(0.881-1.019)	0.144
rs7412928	1q42.13	227332148	C	T	0.379	0.936	-0.031	0.021	0.969	(0.93-1.01)	0.151
rs1473599	1q42.13	227357055	T	C	0.921	0.912	-0.055	0.038	0.946	(0.879-1.02)	0.152
rs1877617	1q42.13	227352930	T	C	0.921	0.912	-0.055	0.038	0.946	(0.879-1.02)	0.152
rs6426572	1q42.13	227351693	C	G	0.921	0.912	-0.055	0.038	0.946	(0.879-1.02)	0.152
rs7540282	1q42.13	227351180	G	T	0.921	0.911	-0.055	0.038	0.946	(0.879-1.02)	0.153
chr1:227312120:D	1q42.13	227312120	AT	A	0.017	0.777	0.128	0.09	1.137	(0.953-1.356)	0.153
chr1:227351212:I	1q42.13	227351212	C	CT	0.921	0.911	-0.054	0.038	0.947	(0.879-1.021)	0.156
rs2313497	1q42.13	227349322	G	A	0.921	0.911	-0.054	0.038	0.947	(0.879-1.021)	0.157
rs1398858	1q42.13	227349667	A	G	0.921	0.911	-0.054	0.038	0.947	(0.879-1.021)	0.157
rs138306732	1q42.13	227334495	C	T	0.016	0.786	0.129	0.091	1.138	(0.952-1.36)	0.157
rs6426570	1q42.13	227341544	C	T	0.921	0.91	-0.054	0.038	0.947	(0.879-1.021)	0.159
rs6413866	1q42.13	227341694	C	T	0.921	0.91	-0.054	0.038	0.947	(0.879-1.021)	0.159
rs1513619	1q42.13	227344817	T	C	0.921	0.91	-0.054	0.038	0.947	(0.879-1.021)	0.160
rs115346894	1q42.13	227307816	G	A	0.013	0.954	0.127	0.092	1.135	(0.948-1.36)	0.166
chr1:227273807:D	1q42.13	227273807	CTTCT	C	0.096	0.871	-0.05	0.036	0.951	(0.886-1.021)	0.167
rs61834044	1q42.13	227273586	G	C	0.096	0.871	-0.05	0.036	0.951	(0.886-1.021)	0.167
rs56311356	1q42.13	227335084	T	C	0.008	0.828	-0.167	0.122	0.846	(0.666-1.075)	0.170
rs12039370	1q42.13	227326472	A	G	0.381	0.939	-0.029	0.021	0.971	(0.932-1.012)	0.178
rs141402951	1q42.13	227283355	C	T	0.014	0.818	-0.129	0.097	0.879	(0.727-1.063)	0.182
rs115445098	1q42.13	227263429	T	C	0.012	0.91	0.129	0.097	1.138	(0.941-1.376)	0.185
rs12139758	1q42.13	227260519	A	G	0.621	0.947	0.028	0.021	1.028	(0.987-1.072)	0.192
rs189075833	1q42.13	227303185	T	G	0.007	0.504	0.224	0.172	1.251	(0.893-1.753)	0.194
rs6685823	1q42.13	227270835	A	G	0.621	0.945	0.028	0.021	1.028	(0.987-1.072)	0.194
rs78863867	1q42.13	227262921	G	A	0.028	0.854	0.085	0.066	1.089	(0.957-1.239)	0.198
rs2482454	1q42.13	227306576	T	G	0.621	0.946	0.027	0.021	1.027	(0.986-1.071)	0.199
rs694740	1q42.13	227293451	T	C	0.621	0.946	0.027	0.021	1.027	(0.986-1.071)	0.199
rs2102634	1q42.13	227324308	T	C	0.379	0.934	-0.027	0.021	0.973	(0.934-1.014)	0.201
rs4351610	1q42.13	227325245	A	G	0.379	0.934	-0.027	0.021	0.973	(0.934-1.014)	0.204
rs4653479	1q42.13	227275981	A	G	0.62	0.948	0.027	0.021	1.027	(0.986-1.071)	0.209
rs7549520	1q42.13	227258858	G	C	0.62	0.948	0.027	0.021	1.027	(0.986-1.071)	0.210
rs689094	1q42.13	227308909	G	A	0.621	0.946	0.027	0.021	1.027	(0.986-1.071)	0.212
rs3106473	1q42.13	227319913	A	G	0.696	0.76	0.031	0.025	1.031	(0.982-1.083)	0.213
rs488104	1q42.13	227300277	G	A	0.62	0.947	0.026	0.021	1.026	(0.985-1.069)	0.214
rs6699828	1q42.13	227274591	T	C	0.62	0.946	0.026	0.021	1.026	(0.985-1.069)	0.214
rs56219094	1q42.13	227340191	T	C	0.38	0.943	-0.026	0.021	0.974	(0.935-1.015)	0.215
rs2492630	1q42.13	227286931	A	G	0.62	0.947	0.026	0.021	1.026	(0.985-1.069)	0.215
rs648877	1q42.13	227283614	A	G	0.62	0.947	0.026	0.021	1.026	(0.985-1.069)	0.215
rs3754418	1q42.13	227348473	T	C	0.38	0.945	-0.026	0.021	0.974	(0.935-1.015)	0.217
rs498020	1q42.13	227304180	G	A	0.617	0.94	0.026	0.021	1.026	(0.985-1.069)	0.220
rs485234	1q42.13	227317747	A	G	0.619	0.942	0.026	0.021	1.026	(0.985-1.069)	0.227
rs12025875	1q42.13	227356200	T	G	0.32	0.835	-0.028	0.023	0.972	(0.93-1.017)	0.229
chr1:227285029:D	1q42.13	227285029	ATATTGC	A	0.619	0.942	0.025	0.021	1.025	(0.984-1.068)	0.236
rs4653789	1q42.13	227280717	A	C	0.764	0.932	0.028	0.024	1.028	(0.981-1.078)	0.240
rs188668952	1q42.13	227336447	G	A	0.02	0.641	-0.107	0.091	0.899	(0.752-1.074)	0.242
chr1:227283152:I	1q42.13	227283152	A	AT	0.607	0.919	0.025	0.021	1.025	(0.984-1.068)	0.242
rs6675179	1q42.13	227332043	T	C	0.924	0.915	-0.046	0.04	0.955	(0.883-1.033)	0.245
chr1:227319816:D	1q42.13	227319816	ACCCTCT	A	0.256	0.893	0.027	0.024	1.027	(0.98-1.077)	0.270
rs139706798	1q42.13	227262640	C	T	0.009	0.767	-0.129	0.119	0.879	(0.696-1.11)	0.279
chr1:227288294:D	1q42.13	227288294	GTTTC	G	0.204	0.982	-0.027	0.025	0.973	(0.927-1.022)	0.282
rs1929868	1q42.13	227262636	C	G	0.206	0.994	-0.027	0.025	0.973	(0.927-1.022)	0.284
rs1929869	1q42.13	227262724	G	A	0.206	0.994	-0.027	0.025	0.973	(0.927-1.022)	0.285
rs1464079	1q42.13	227308963	C	A	0.207	0.988	-0.027	0.025	0.973	(0.927-1.022)	0.286
rs6662443	1q42.13	227285073	C	T	0.206	0.991	-0.027	0.025	0.973	(0.927-1.022)	0.288
rs10916086	1q42.13	227282833	C	T	0.206	0.992	-0.027	0.025	0.973	(0.927-1.022)	0.288
rs34708504	1q42.13	227288383	C	T	0.206	0.99	-0.027	0.025	0.973	(0.927-1.022)	0.289
rs183738566	1q42.13	227322329	A	G	0.006	0.641	-0.181	0.172	0.834	(0.596-1.169)	0.292
rs10799397	1q42.13	227351305	G	C	0.204	0.98	-0.026	0.025	0.974	(0.928-1.023)	0.294
rs6674641	1q42.13	227312645	G	A	0.205	0.966	-0.027	0.025	0.973	(0.927-1.022)	0.296
rs1304324	1q42.13	227285635	C	T	0.202	0.985	-0.026	0.025	0.974	(0.928-1.023)	0.297
chr1:227351442:D	1q42.13	227351442	AAAT	A	0.149	0.524	0.041	0.039	1.042	(0.965-1.125)	0.299
rs10799384	1q42.13	227297555	G	A	0.206	0.987	-0.026	0.025	0.974	(0.928-1.023)	0.301
chr1:227351444:D	1q42.13	227351444	AT	A	0.223	0.891	0.026	0.026	1.026	(0.975-1.08)	0.303
rs192753267	1q42.13	227323542	G	A	0.006	0.5	-0.188	0.183	0.829	(0.579-1.186)	0.306
rs12073220	1q42.13	227277728	C	T	0.214	0.993	-0.025	0.025	0.975	(0.929-1.024)	0.308
chr1:227267956:D	1q42.13	227267956	TAC	T	0.202	0.982	-0.026	0.025	0.974	(0.928-1.023)	0.312
rs6682849	1q42.13	227266677	C	T	0.207	0.993	-0.025	0.025	0.975	(0.929-1.024)	0.312
rs10916084	1q42.13	227269265	T	C	0.207	0.993	-0.025	0.025	0.975	(0.929-1.024)	0.312
rs10916085	1q42.13	227269303	G	A	0.207	0.993	-0.025	0.025	0.975	(0.929-1.024)	0.312
rs188031662	1q42.13	227330843	A	G	0.01	0.756	-0.12	0.119	0.887	(0.702-1.12)	0.312
chr1:227288305:D	1q42.13	227288305	TC	T	0.179	0.911	-0.028	0.028	0.972	(0.92-1.027)	0.312
rs116719557	1q42.13	227297138	C	T	0.026	0.854	-0.07	0.069	0.932	(0.814-1.067)	0.312
rs10495260	1q42.13	227261403	T	C	0.207	0.993	-0.025	0.025	0.975	(0.929-1.024)	0.314
rs191950635	1q42.13	227353162	T	C	0.006	0.6	0.174	0.173	1.19	(0.848-1.67)	0.314
rs10916083	1q42.13	227265925	C	T	0.207	0.993	-0.025	0.025	0.975	(0.929-1.024)	0.314
rs12047828	1q42.13	227268836	T	C	0.207	0.993	-0.025	0.025	0.975	(0.929-1.024)	0.314
rs12140758	1q42.13	227261290	A	C	0.207	0.993	-0.025	0.025	0.975	(0.929-1.024)	0.314
chr1:227351508:D	1q42.13	227351508	ACAT	A	0.024	0.694	0.079	0.079	1.082	(0.927-1.263)	0.314
rs12565056	1q42.13	227304291	T	C	0.207	0.987	-0.025	0.025	0.975	(0.929-1.024)	0.316
rs77532794	1q42.13	227284923	G	A	0.026	0.855	-0.069	0.069	0.933	(0.815-1.068)	0.316
rs12125514	1q42.13	227289879	T	A	0.207	0.988	-0.025	0.025	0.975	(0.929-1.024)	0.317
rs10799383	1q42.13	227279883	C	T	0.207	0.99	-0.025	0.025	0.975	(0.929-1.024)	0.317
rs12563165	1q42.13	227282217	A	G	0.207	0.99	-0.025	0.025	0.975	(0.929-1.024)	0.318
rs10916089	1q42.13	227292525	A	G	0.206	0.985	-0.025	0.025	0.975	(0.929-1.024)	0.318
rs1007574	1q42.13	227345094	T	A	0.208	0.993	-0.025	0.025	0.975	(0.929-1.024)	0.319
rs115787415	1q42.13	227297583	G	A	0.006	0.832	-0.143	0.146	0.867	(0.651-1.154)	0.328
rs6684284	1q42.13	227312573	C	T	0.208	0.985	-0.024	0.025	0.976	(0.93-1.025)	0.329
rs10916090	1q42.13	227318464	G	A	0.199	0.97	-0.025	0.026	0.975	(0.927-1.026)	0.330
chr1:227356195:I	1q42.13	227356195	G	GGT	0.346	0.897	-0.021	0.022	0.979	(0.938-1.022)	0.342
rs10799396	1q42.13	227350100	A	G	0.208	0.992	-0.023	0.025	0.977	(0.931-1.026)	0.348
rs9887962	1q42.13	227340640	T	C	0.208	0.991	-0.023	0.025	0.977	(0.931-1.026)	0.349
chr1:227356199:I	1q42.13	227356199	T	TG	0.346	0.899	-0.021	0.022	0.979	(0.938-1.022)	0.350
chr1:227353165:I	1q42.13	227353165	C	CA	0.208	0.993	-0.023	0.025	0.977	(0.931-1.026)	0.352
rs10799390	1q42.13	227331101	A	G	0.085	0.925	-0.034	0.037	0.967	(0.899-1.039)	0.356
rs35651721	1q42.13	227277338	T	G	0.132	0.902	-0.029	0.032	0.971	(0.912-1.034)	0.360
rs12727754	1q42.13	227356925	C	T	0.088	0.942	-0.033	0.037	0.968	(0.9-1.04)	0.361
rs4528079	1q42.13	227320645	T	C	0.815	0.627	-0.03	0.033	0.97	(0.91-1.035)	0.368
rs72750172	1q42.13	227325067	G	C	0.206	0.984	-0.022	0.025	0.978	(0.931-1.027)	0.374
rs10916092	1q42.13	227327981	A	C	0.206	0.984	-0.022	0.025	0.978	(0.931-1.027)	0.375
rs12135061	1q42.13	227325466	T	C	0.206	0.983	-0.022	0.025	0.978	(0.931-1.027)	0.375
rs188019168	1q42.13	227270981	A	T	0.127	0.877	0.028	0.032	1.028	(0.966-1.095)	0.379
rs10799391	1q42.13	227335783	G	A	0.206	0.986	-0.022	0.025	0.978	(0.931-1.027)	0.382
rs10916097	1q42.13	227339895	C	A	0.206	0.987	-0.022	0.025	0.978	(0.931-1.027)	0.388
chr1:227340936:I	1q42.13	227340936	G	GA	0.544	0.941	-0.018	0.021	0.982	(0.943-1.023)	0.393
rs678580	1q42.13	227281572	T	C	0.977	0.831	0.061	0.071	1.063	(0.925-1.222)	0.395
rs3754419	1q42.13	227348349	A	C	0.099	0.934	-0.029	0.035	0.971	(0.907-1.04)	0.407
rs114236197	1q42.13	227340230	A	T	0.013	0.505	0.105	0.128	1.111	(0.864-1.427)	0.411
rs7413400	1q42.13	227326524	A	T	0.087	0.939	-0.03	0.037	0.97	(0.903-1.043)	0.412
rs6685954	1q42.13	227335329	T	C	0.206	0.985	-0.02	0.025	0.98	(0.933-1.029)	0.417
rs77888312	1q42.13	227326048	T	G	0.007	0.886	0.103	0.128	1.108	(0.863-1.425)	0.420
rs12747807	1q42.13	227343741	G	A	0.129	0.955	-0.025	0.031	0.975	(0.918-1.036)	0.422
chr1:227274916:D	1q42.13	227274916	TTTGAG	T	0.106	0.933	-0.027	0.034	0.973	(0.911-1.04)	0.427
rs12141869	1q42.13	227336876	T	G	0.207	0.984	-0.02	0.025	0.98	(0.933-1.029)	0.427
rs116616667	1q42.13	227273699	G	A	0.06	0.841	-0.036	0.046	0.965	(0.881-1.056)	0.434
rs12119448	1q42.13	227349647	T	C	0.128	0.961	-0.024	0.031	0.976	(0.919-1.037)	0.436
rs144770278	1q42.13	227331496	A	C	0.006	0.66	-0.121	0.156	0.886	(0.653-1.203)	0.437
rs11811176	1q42.13	227273980	T	G	0.195	0.928	0.02	0.026	1.02	(0.97-1.074)	0.437
rs10916096	1q42.13	227337702	T	A	0.939	0.886	-0.034	0.044	0.967	(0.887-1.054)	0.445
rs1513623	1q42.13	227338862	T	C	0.948	0.946	-0.035	0.046	0.966	(0.882-1.057)	0.445
rs10799385	1q42.13	227322075	G	A	0.948	0.947	-0.034	0.046	0.967	(0.883-1.058)	0.462
rs4653801	1q42.13	227355262	C	G	0.087	0.945	-0.027	0.037	0.973	(0.905-1.047)	0.464
rs36133891	1q42.13	227350825	C	A	0.12	0.918	-0.024	0.033	0.976	(0.915-1.042)	0.464
rs141407685	1q42.13	227323338	G	A	0.018	0.783	0.059	0.084	1.061	(0.9-1.251)	0.480
rs6426574	1q42.13	227352118	T	C	0.993	0.831	0.089	0.127	1.093	(0.852-1.402)	0.482
rs140587186	1q42.13	227330540	C	T	0.006	0.76	-0.103	0.148	0.902	(0.675-1.206)	0.487
rs114420915	1q42.13	227350667	G	A	0.027	0.521	-0.06	0.086	0.942	(0.796-1.115)	0.488
rs183801039	1q42.13	227320674	G	A	0.174	0.836	0.02	0.029	1.02	(0.964-1.08)	0.494
rs6702869	1q42.13	227328649	C	T	0.949	0.951	-0.031	0.046	0.969	(0.886-1.061)	0.500
rs6656723	1q42.13	227328735	C	T	0.949	0.951	-0.031	0.046	0.969	(0.886-1.061)	0.500
rs12063170	1q42.13	227330225	C	T	0.949	0.951	-0.031	0.046	0.969	(0.886-1.061)	0.500
rs10916094	1q42.13	227330488	G	T	0.949	0.951	-0.031	0.046	0.969	(0.886-1.061)	0.500
rs7517177	1q42.13	227325528	C	G	0.949	0.951	-0.031	0.046	0.969	(0.886-1.061)	0.500
rs6426568	1q42.13	227331853	G	T	0.949	0.951	-0.031	0.046	0.969	(0.886-1.061)	0.501
rs10799386	1q42.13	227324674	C	A	0.949	0.951	-0.031	0.046	0.969	(0.886-1.061)	0.501
rs10916091	1q42.13	227327732	T	G	0.949	0.951	-0.031	0.046	0.969	(0.886-1.061)	0.501
rs10916095	1q42.13	227337701	T	G	0.941	0.901	-0.03	0.045	0.97	(0.889-1.06)	0.502
rs114845813	1q42.13	227344961	C	T	0.028	0.9	0.043	0.064	1.044	(0.921-1.183)	0.502
chr1:227338570:D	1q42.13	227338570	GA	G	0.553	0.855	-0.015	0.022	0.985	(0.944-1.029)	0.507
rs61836501	1q42.13	227343295	G	A	0.006	0.623	-0.107	0.164	0.899	(0.652-1.239)	0.514
chr1:227350746:D	1q42.13	227350746	CAT	C	0.179	0.761	0.02	0.03	1.02	(0.962-1.082)	0.517
rs78386413	1q42.13	227319544	A	G	0.013	0.567	0.076	0.117	1.079	(0.858-1.357)	0.519
rs2458522	1q42.13	227294519	T	C	0.052	0.954	0.03	0.046	1.03	(0.942-1.128)	0.520
rs73093467	1q42.13	227268030	C	T	0.007	0.758	0.09	0.139	1.094	(0.833-1.437)	0.520
rs556343	1q42.13	227305901	A	G	0.052	0.954	0.029	0.046	1.029	(0.941-1.127)	0.522
rs629571	1q42.13	227304838	T	C	0.052	0.954	0.029	0.046	1.029	(0.941-1.127)	0.522
rs9426545	1q42.13	227302912	A	G	0.052	0.951	0.03	0.046	1.03	(0.942-1.128)	0.522
rs602585	1q42.13	227318498	G	A	0.052	0.953	0.03	0.046	1.03	(0.942-1.128)	0.522
rs664617	1q42.13	227297688	T	C	0.052	0.954	0.029	0.046	1.029	(0.941-1.127)	0.523
rs512538	1q42.13	227297628	A	G	0.052	0.954	0.029	0.046	1.029	(0.941-1.127)	0.523
rs6697304	1q42.13	227354375	G	A	0.013	0.698	0.068	0.107	1.07	(0.868-1.32)	0.523
chr1:227307102:D	1q42.13	227307102	CA	C	0.052	0.95	0.029	0.046	1.029	(0.941-1.127)	0.525
rs477162	1q42.13	227307455	C	T	0.042	0.945	0.032	0.051	1.033	(0.934-1.141)	0.528
rs9426600	1q42.13	227291992	T	C	0.052	0.955	0.029	0.046	1.029	(0.941-1.127)	0.529
rs17606040	1q42.13	227318028	A	G	0.109	0.939	-0.021	0.033	0.979	(0.918-1.045)	0.529
rs531137	1q42.13	227289889	G	T	0.052	0.955	0.029	0.046	1.029	(0.941-1.127)	0.529
rs485674	1q42.13	227284947	C	A	0.052	0.955	0.028	0.046	1.028	(0.94-1.125)	0.536
rs567677	1q42.13	227284167	T	C	0.052	0.955	0.028	0.046	1.028	(0.94-1.125)	0.536
rs10495258	1q42.13	227311310	C	T	0.137	0.923	0.019	0.03	1.019	(0.961-1.081)	0.537
rs507967	1q42.13	227297112	G	A	0.052	0.954	0.028	0.046	1.028	(0.94-1.125)	0.539
rs555786	1q42.13	227290266	A	C	0.042	0.946	0.031	0.051	1.031	(0.933-1.14)	0.539
rs501772	1q42.13	227281557	C	G	0.054	0.945	0.028	0.046	1.028	(0.94-1.125)	0.540
rs1757943	1q42.13	227281433	G	T	0.054	0.945	0.028	0.046	1.028	(0.94-1.125)	0.540
rs77876793	1q42.13	227280222	C	T	0.054	0.945	0.028	0.046	1.028	(0.94-1.125)	0.540
rs17605533	1q42.13	227306831	T	C	0.138	0.922	0.019	0.03	1.019	(0.961-1.081)	0.540
rs79463640	1q42.13	227313894	C	T	0.137	0.923	0.019	0.03	1.019	(0.961-1.081)	0.542
rs80318211	1q42.13	227312821	T	C	0.137	0.923	0.019	0.03	1.019	(0.961-1.081)	0.543
rs12404627	1q42.13	227296369	T	C	0.138	0.921	0.018	0.03	1.018	(0.96-1.08)	0.543
rs17546688	1q42.13	227315379	T	A	0.125	0.947	-0.019	0.032	0.981	(0.922-1.045)	0.543
rs7538778	1q42.13	227269707	T	G	0.054	0.951	0.028	0.045	1.028	(0.942-1.123)	0.545
rs35017425	1q42.13	227261648	C	T	0.006	0.574	-0.103	0.171	0.902	(0.645-1.261)	0.548
rs7413768	1q42.13	227325972	T	C	0.137	0.924	0.018	0.03	1.018	(0.96-1.08)	0.549
rs76141989	1q42.13	227325274	A	G	0.137	0.924	0.018	0.03	1.018	(0.96-1.08)	0.549
rs141811601	1q42.13	227300771	A	G	0.028	0.893	0.038	0.064	1.039	(0.916-1.178)	0.550
rs16846968	1q42.13	227261520	C	T	0.054	0.952	0.027	0.045	1.027	(0.941-1.122)	0.551
rs10495261	1q42.13	227260718	G	C	0.054	0.952	0.027	0.045	1.027	(0.941-1.122)	0.551
rs10495262	1q42.13	227260130	G	A	0.054	0.952	0.027	0.045	1.027	(0.941-1.122)	0.551
rs12407061	1q42.13	227288049	C	T	0.138	0.921	0.018	0.03	1.018	(0.96-1.08)	0.551
rs76978751	1q42.13	227335644	G	A	0.137	0.927	0.018	0.03	1.018	(0.96-1.08)	0.552
rs12403833	1q42.13	227285929	G	A	0.138	0.922	0.018	0.03	1.018	(0.96-1.08)	0.552
rs10495263	1q42.13	227259884	G	A	0.138	0.922	0.018	0.03	1.018	(0.96-1.08)	0.553
rs12401556	1q42.13	227269311	G	A	0.139	0.919	0.018	0.03	1.018	(0.96-1.08)	0.553
rs78335667	1q42.13	227287313	C	T	0.138	0.919	0.018	0.03	1.018	(0.96-1.08)	0.555
rs4551563	1q42.13	227278899	G	A	0.138	0.919	0.018	0.03	1.018	(0.96-1.08)	0.556
rs114817164	1q42.13	227354238	A	C	0.02	0.836	-0.046	0.079	0.955	(0.818-1.115)	0.562
rs74429761	1q42.13	227337175	T	C	0.138	0.928	0.017	0.03	1.017	(0.959-1.079)	0.567
rs77928082	1q42.13	227344421	T	A	0.137	0.933	0.017	0.03	1.017	(0.959-1.079)	0.568
rs79046754	1q42.13	227339211	G	A	0.138	0.929	0.017	0.03	1.017	(0.959-1.079)	0.568
rs79750570	1q42.13	227344720	G	T	0.137	0.933	0.017	0.03	1.017	(0.959-1.079)	0.569
rs12405122	1q42.13	227295038	G	A	0.146	0.905	0.017	0.03	1.017	(0.959-1.079)	0.570
rs72748189	1q42.13	227290397	A	G	0.018	0.831	0.047	0.082	1.048	(0.893-1.231)	0.570
rs183000310	1q42.13	227279016	G	A	0.007	0.774	-0.078	0.137	0.925	(0.707-1.21)	0.573
rs112620261	1q42.13	227296125	G	A	0.138	0.921	0.017	0.03	1.017	(0.959-1.079)	0.576
rs150702598	1q42.13	227331031	A	C	0.018	0.793	-0.046	0.084	0.955	(0.81-1.126)	0.580
rs79359782	1q42.13	227315660	C	T	0.006	0.825	-0.08	0.145	0.923	(0.695-1.227)	0.584
rs6675383	1q42.13	227332229	T	C	0.14	0.915	0.016	0.03	1.016	(0.958-1.078)	0.589
rs79991887	1q42.13	227270373	G	A	0.053	0.951	0.024	0.046	1.024	(0.936-1.121)	0.599
rs144473177	1q42.13	227270308	C	T	0.136	0.916	0.016	0.031	1.016	(0.956-1.08)	0.599
chr1:227350545:D	1q42.13	227350545	AAAAAT	A	0.134	0.895	0.016	0.031	1.016	(0.956-1.08)	0.601
chr1:227290511:D	1q42.13	227290511	GAATT	G	0.142	0.915	0.016	0.03	1.016	(0.958-1.078)	0.606
chr1:227297415:D	1q42.13	227297415	TTTTA	T	0.142	0.915	0.015	0.03	1.015	(0.957-1.077)	0.610
rs57513303	1q42.13	227305968	C	T	0.141	0.919	0.015	0.03	1.015	(0.957-1.077)	0.611
rs12405878	1q42.13	227304863	T	C	0.141	0.919	0.015	0.03	1.015	(0.957-1.077)	0.611
rs73100804	1q42.13	227298607	G	C	0.141	0.919	0.015	0.03	1.015	(0.957-1.077)	0.612
rs73100814	1q42.13	227301914	C	G	0.141	0.919	0.015	0.03	1.015	(0.957-1.077)	0.612
rs12404416	1q42.13	227296624	A	G	0.141	0.919	0.015	0.03	1.015	(0.957-1.077)	0.613
rs12408437	1q42.13	227315408	G	C	0.14	0.922	0.015	0.03	1.015	(0.957-1.077)	0.617
rs60291100	1q42.13	227292400	C	A	0.141	0.919	0.015	0.03	1.015	(0.957-1.077)	0.617
rs2090009	1q42.13	227313362	G	A	0.14	0.922	0.015	0.03	1.015	(0.957-1.077)	0.617
rs73099023	1q42.13	227290987	C	A	0.141	0.919	0.015	0.03	1.015	(0.957-1.077)	0.617
rs12411017	1q42.13	227269867	T	C	0.141	0.919	0.015	0.03	1.015	(0.957-1.077)	0.617
rs12410460	1q42.13	227269582	A	C	0.141	0.919	0.015	0.03	1.015	(0.957-1.077)	0.617
rs73099026	1q42.13	227291760	T	C	0.141	0.919	0.015	0.03	1.015	(0.957-1.077)	0.617
rs16847098	1q42.13	227291953	C	T	0.141	0.919	0.015	0.03	1.015	(0.957-1.077)	0.617
rs12410337	1q42.13	227268258	T	C	0.141	0.919	0.015	0.03	1.015	(0.957-1.077)	0.617
rs16847035	1q42.13	227271384	T	C	0.141	0.919	0.015	0.03	1.015	(0.957-1.077)	0.617
rs11799413	1q42.13	227270914	T	C	0.141	0.919	0.015	0.03	1.015	(0.957-1.077)	0.617
chr1:227289113:D	1q42.13	227289113	AT	A	0.141	0.919	0.015	0.03	1.015	(0.957-1.077)	0.618
rs112787790	1q42.13	227270187	G	A	0.141	0.919	0.015	0.03	1.015	(0.957-1.077)	0.618
rs16847014	1q42.13	227266113	G	A	0.141	0.919	0.015	0.03	1.015	(0.957-1.077)	0.618
rs73093495	1q42.13	227272527	G	C	0.141	0.919	0.015	0.03	1.015	(0.957-1.077)	0.618
rs73093463	1q42.13	227266442	T	C	0.141	0.919	0.015	0.03	1.015	(0.957-1.077)	0.618
rs60641481	1q42.13	227312564	G	T	0.14	0.922	0.015	0.03	1.015	(0.957-1.077)	0.618
rs11806820	1q42.13	227288571	C	T	0.141	0.919	0.015	0.03	1.015	(0.957-1.077)	0.619
rs16846985	1q42.13	227263362	A	G	0.141	0.919	0.015	0.03	1.015	(0.957-1.077)	0.619
rs1888831	1q42.13	227262314	T	C	0.142	0.919	0.015	0.03	1.015	(0.957-1.077)	0.619
rs16846972	1q42.13	227262581	G	A	0.142	0.919	0.015	0.03	1.015	(0.957-1.077)	0.620
rs12403391	1q42.13	227287627	T	C	0.141	0.919	0.015	0.03	1.015	(0.957-1.077)	0.620
rs12404494	1q42.13	227287887	G	C	0.141	0.919	0.015	0.03	1.015	(0.957-1.077)	0.620
rs1513600	1q42.13	227284165	A	G	0.141	0.919	0.015	0.03	1.015	(0.957-1.077)	0.621
rs6701743	1q42.13	227280143	T	C	0.141	0.915	0.015	0.03	1.015	(0.957-1.077)	0.624
rs142334973	1q42.13	227293620	A	C	0.009	0.697	0.063	0.129	1.065	(0.827-1.371)	0.624
rs11809998	1q42.13	227331349	T	C	0.14	0.922	0.015	0.03	1.015	(0.957-1.077)	0.624
rs75350334	1q42.13	227330276	C	T	0.14	0.922	0.015	0.03	1.015	(0.957-1.077)	0.624
rs73102936	1q42.13	227330951	T	C	0.14	0.922	0.015	0.03	1.015	(0.957-1.077)	0.624
rs188198790	1q42.13	227356445	G	A	0.006	0.461	-0.096	0.196	0.908	(0.619-1.334)	0.625
rs56834719	1q42.13	227332543	G	C	0.14	0.924	0.015	0.03	1.015	(0.957-1.077)	0.625
rs11800062	1q42.13	227348126	T	C	0.139	0.929	0.015	0.03	1.015	(0.957-1.077)	0.626
rs73086746	1q42.13	227344465	T	C	0.139	0.929	0.015	0.03	1.015	(0.957-1.077)	0.626
rs73086752	1q42.13	227345335	T	C	0.139	0.929	0.015	0.03	1.015	(0.957-1.077)	0.626
rs73086775	1q42.13	227350414	G	A	0.139	0.929	0.015	0.03	1.015	(0.957-1.077)	0.626
rs16847140	1q42.13	227307789	A	C	0.03	0.881	-0.03	0.063	0.97	(0.858-1.098)	0.627
rs74143321	1q42.13	227349550	A	T	0.139	0.928	0.015	0.03	1.015	(0.957-1.077)	0.628
rs73102915	1q42.13	227322676	T	C	0.14	0.921	0.015	0.03	1.015	(0.957-1.077)	0.629
rs111493837	1q42.13	227281511	G	A	0.011	0.748	-0.054	0.112	0.947	(0.761-1.18)	0.630
rs111510118	1q42.13	227323316	G	A	0.14	0.921	0.015	0.03	1.015	(0.957-1.077)	0.630
rs73102920	1q42.13	227324813	T	C	0.14	0.921	0.015	0.03	1.015	(0.957-1.077)	0.630
rs73102930	1q42.13	227329044	A	C	0.14	0.922	0.015	0.03	1.015	(0.957-1.077)	0.631
rs1877622	1q42.13	227342346	G	A	0.145	0.923	0.014	0.03	1.014	(0.956-1.076)	0.632
rs12123597	1q42.13	227353481	T	C	0.132	0.96	-0.015	0.031	0.985	(0.927-1.047)	0.634
rs60866629	1q42.13	227339960	T	C	0.14	0.928	0.014	0.03	1.014	(0.956-1.076)	0.635
rs76179768	1q42.13	227341374	G	A	0.137	0.925	0.014	0.03	1.014	(0.956-1.076)	0.647
chr1:227347181:D	1q42.13	227347181	TA	T	0.034	0.455	-0.038	0.083	0.963	(0.818-1.133)	0.649
chr1:227277255:D	1q42.13	227277255	AC	A	0.028	0.701	-0.033	0.073	0.968	(0.839-1.116)	0.651
rs181939093	1q42.13	227320849	G	A	0.025	0.619	-0.037	0.082	0.964	(0.821-1.132)	0.652
rs114931051	1q42.13	227270982	A	T	0.146	0.895	0.013	0.03	1.013	(0.955-1.074)	0.661
rs73100852	1q42.13	227322535	T	A	0.142	0.911	0.013	0.03	1.013	(0.955-1.074)	0.668
rs76810278	1q42.13	227350909	A	G	0.009	0.58	-0.06	0.141	0.942	(0.714-1.242)	0.669
rs75461500	1q42.13	227282026	C	T	0.006	0.511	0.076	0.183	1.079	(0.754-1.544)	0.680
rs137937671	1q42.13	227309547	G	C	0.028	0.891	-0.026	0.065	0.974	(0.858-1.107)	0.687
rs149099874	1q42.13	227276092	G	T	0.028	0.904	-0.026	0.064	0.974	(0.859-1.105)	0.690
rs10799387	1q42.13	227324742	G	C	0.992	0.841	0.047	0.119	1.048	(0.83-1.323)	0.691
rs60079575	1q42.13	227333141	T	C	0.142	0.923	0.012	0.03	1.012	(0.954-1.073)	0.696
rs185668439	1q42.13	227338707	G	C	0.012	0.705	0.044	0.114	1.045	(0.836-1.307)	0.700
rs116214146	1q42.13	227346126	G	A	0.012	0.705	0.044	0.114	1.045	(0.836-1.307)	0.701
rs148002362	1q42.13	227267805	C	T	0.028	0.891	-0.025	0.064	0.975	(0.86-1.106)	0.701
rs72750187	1q42.13	227330300	C	T	0.107	0.936	-0.013	0.034	0.987	(0.923-1.055)	0.702
rs150549048	1q42.13	227289580	A	G	0.009	0.785	-0.046	0.123	0.955	(0.75-1.215)	0.705
rs75130487	1q42.13	227353960	C	T	0.031	0.828	-0.024	0.063	0.976	(0.863-1.105)	0.706
rs61836474	1q42.13	227321139	C	T	0.156	0.871	-0.011	0.03	0.989	(0.933-1.049)	0.710
rs56915445	1q42.13	227320180	T	C	0.074	0.7	0.017	0.046	1.017	(0.929-1.113)	0.712
rs12409816	1q42.13	227329770	G	A	0.146	0.905	0.01	0.03	1.01	(0.952-1.071)	0.727
rs115018649	1q42.13	227313842	G	A	0.009	0.788	-0.043	0.123	0.958	(0.753-1.219)	0.728
rs78168134	1q42.13	227352462	G	A	0.142	0.952	0.01	0.03	1.01	(0.952-1.071)	0.733
rs12741341	1q42.13	227338539	A	C	0.23	0.756	0.009	0.028	1.009	(0.955-1.066)	0.735
rs111295202	1q42.13	227287302	G	T	0.024	0.645	-0.028	0.082	0.972	(0.828-1.142)	0.738
chr1:227350555:D	1q42.13	227350555	TA	T	0.135	0.912	0.01	0.031	1.01	(0.951-1.073)	0.739
rs72748194	1q42.13	227305286	G	A	0.048	0.74	-0.018	0.055	0.982	(0.882-1.094)	0.744
rs75233952	1q42.13	227351163	T	C	0.142	0.951	0.01	0.03	1.01	(0.952-1.071)	0.747
rs77275819	1q42.13	227351236	T	C	0.142	0.951	0.009	0.03	1.009	(0.951-1.07)	0.748
rs75048616	1q42.13	227352289	C	T	0.142	0.951	0.009	0.03	1.009	(0.951-1.07)	0.748
rs6426567	1q42.13	227331578	T	A	0.967	0.911	-0.018	0.059	0.982	(0.875-1.103)	0.765
rs183901504	1q42.13	227319688	A	G	0.006	0.719	0.047	0.159	1.048	(0.767-1.431)	0.768
chr1:227317402:I	1q42.13	227317402	G	GCATA	0.051	0.706	-0.015	0.054	0.985	(0.886-1.095)	0.789
rs73088658	1q42.13	227356598	C	T	0.144	0.949	0.008	0.029	1.008	(0.952-1.067)	0.798
rs1513603	1q42.13	227357570	A	T	0.144	0.949	0.008	0.029	1.008	(0.952-1.067)	0.798
rs116077791	1q42.13	227309190	C	A	0.037	0.836	-0.015	0.058	0.985	(0.879-1.104)	0.800
rs143832043	1q42.13	227308787	G	A	0.008	0.936	-0.029	0.116	0.971	(0.774-1.219)	0.804
rs115256093	1q42.13	227346697	G	A	0.014	0.803	-0.024	0.098	0.976	(0.806-1.183)	0.804
rs72748172	1q42.13	227271924	G	A	0.027	0.842	-0.017	0.068	0.983	(0.86-1.123)	0.805
rs73086756	1q42.13	227347791	T	G	0.007	0.729	-0.036	0.147	0.965	(0.723-1.287)	0.807
rs79257318	1q42.13	227264480	T	C	0.017	0.777	-0.021	0.088	0.979	(0.824-1.164)	0.812
rs113641364	1q42.13	227356400	G	A	0.149	0.925	0.007	0.029	1.007	(0.951-1.066)	0.824
chr1:227327454:I	1q42.13	227327454	G	GA	0.01	0.587	0.029	0.135	1.029	(0.79-1.341)	0.828
chr1:227350808:I	1q42.13	227350808	T	TAA	0.162	0.759	0.006	0.031	1.006	(0.947-1.069)	0.836
rs181720336	1q42.13	227293045	T	C	0.008	0.55	-0.031	0.157	0.969	(0.713-1.319)	0.843
chr1:227356210:I	1q42.13	227356210	T	TG	0.081	0.694	-0.009	0.044	0.991	(0.909-1.08)	0.844
rs12755437	1q42.13	227318560	A	C	0.16	0.953	0.006	0.028	1.006	(0.952-1.063)	0.845
rs11811100	1q42.13	227331275	G	A	0.006	0.766	-0.03	0.154	0.97	(0.718-1.312)	0.846
chr1:227327133:D	1q42.13	227327133	CTG	C	0.023	0.845	0.014	0.073	1.014	(0.879-1.17)	0.851
rs9645320	1q42.13	227282619	C	G	0.016	0.777	0.016	0.092	1.016	(0.848-1.217)	0.859
rs2313498	1q42.13	227350121	C	T	0.975	0.91	0.011	0.067	1.011	(0.887-1.153)	0.874
rs12118896	1q42.13	227318308	C	T	0.018	0.794	0.013	0.085	1.013	(0.858-1.197)	0.879
rs113683534	1q42.13	227332760	C	A	0.014	0.581	0.016	0.113	1.016	(0.814-1.268)	0.890
rs12744447	1q42.13	227344160	A	C	0.173	0.584	-0.005	0.035	0.995	(0.929-1.066)	0.895
chr1:227349144:I	1q42.13	227349144	A	AT	0.455	0.629	-0.003	0.026	0.997	(0.947-1.049)	0.902
rs72750202	1q42.13	227335915	G	T	0.2	0.983	0.003	0.025	1.003	(0.955-1.053)	0.909
rs191525782	1q42.13	227348869	C	T	0.006	0.791	0.016	0.146	1.016	(0.763-1.353)	0.913
rs75393505	1q42.13	227313934	T	G	0.041	0.939	0.006	0.052	1.006	(0.909-1.114)	0.915
chr1:227352417:D	1q42.13	227352417	GCA	G	0.154	0.879	0.003	0.03	1.003	(0.946-1.064)	0.917
rs185887877	1q42.13	227299345	T	C	0.023	0.763	0.008	0.079	1.008	(0.863-1.177)	0.919
rs12141838	1q42.13	227329577	G	A	0.155	0.957	-0.003	0.029	0.997	(0.942-1.055)	0.921
rs3768437	1q42.13	227347935	G	A	0.2	0.986	0.002	0.025	1.002	(0.954-1.052)	0.922
rs146577446	1q42.13	227341359	T	C	0.008	0.971	0.011	0.117	1.011	(0.804-1.272)	0.927
rs6664330	1q42.13	227309525	G	A	0.157	0.959	0.003	0.028	1.003	(0.949-1.06)	0.928
rs147869916	1q42.13	227307652	A	G	0.006	0.84	0.013	0.143	1.013	(0.765-1.341)	0.928
rs111721606	1q42.13	227320879	T	G	0.142	0.892	0.003	0.03	1.003	(0.946-1.064)	0.935
rs12752546	1q42.13	227340790	A	G	0.156	0.96	-0.002	0.028	0.998	(0.945-1.054)	0.935
rs7526822	1q42.13	227263491	C	T	0.156	0.967	0.002	0.028	1.002	(0.948-1.059)	0.937
rs17544956	1q42.13	227269028	A	G	0.156	0.967	0.002	0.028	1.002	(0.948-1.059)	0.938
rs6695431	1q42.13	227279247	A	G	0.156	0.967	0.002	0.028	1.002	(0.948-1.059)	0.938
rs141174459	1q42.13	227275306	G	C	0.017	0.897	0.006	0.082	1.006	(0.857-1.181)	0.941
rs72748192	1q42.13	227296009	T	C	0.199	0.979	0.002	0.026	1.002	(0.952-1.054)	0.946
rs1320495	1q42.13	227264780	T	C	0.157	0.966	0.002	0.028	1.002	(0.948-1.059)	0.946
rs4146588	1q42.13	227259605	G	A	0.2	0.978	0.002	0.026	1.002	(0.952-1.054)	0.948
rs72750169	1q42.13	227323064	G	C	0.199	0.982	0.002	0.026	1.002	(0.952-1.054)	0.949
chr1:227322206:D	1q42.13	227322206	CCTAA	C	0.156	0.959	0.002	0.029	1.002	(0.947-1.061)	0.952
rs7355000	1q42.13	227309788	C	T	0.199	0.98	0.002	0.026	1.002	(0.952-1.054)	0.953
chr1:227292662:I	1q42.13	227292662	G	GA	0.021	0.515	0.006	0.098	1.006	(0.83-1.219)	0.953
rs13376552	1q42.13	227275506	A	G	0.199	0.98	0.001	0.026	1.001	(0.951-1.053)	0.954
rs1929855	1q42.13	227271302	T	C	0.199	0.98	0.001	0.026	1.001	(0.951-1.053)	0.954
rs10495256	1q42.13	227342798	G	T	0.2	0.985	0.001	0.025	1.001	(0.953-1.051)	0.957
rs148724724	1q42.13	227322620	T	C	0.008	0.672	-0.008	0.14	0.992	(0.754-1.305)	0.957
rs16847205	1q42.13	227334326	A	C	0.01	0.975	0.006	0.104	1.006	(0.821-1.233)	0.957
rs12117207	1q42.13	227272799	A	G	0.165	0.952	0.001	0.028	1.001	(0.948-1.057)	0.960
rs75801597	1q42.13	227271519	T	C	0.01	0.984	0.005	0.105	1.005	(0.818-1.235)	0.961
rs77065266	1q42.13	227277103	T	C	0.01	0.984	0.005	0.105	1.005	(0.818-1.235)	0.961
rs182453113	1q42.13	227335398	A	G	0.006	0.829	0.007	0.142	1.007	(0.762-1.33)	0.962
rs6426578	1q42.13	227357475	G	A	0.199	1	0.001	0.025	1.001	(0.953-1.051)	0.966
rs12744825	1q42.13	227286652	A	G	0.156	0.966	0.001	0.028	1.001	(0.948-1.057)	0.966
rs140473584	1q42.13	227292485	G	T	0.01	0.984	0.004	0.105	1.004	(0.817-1.233)	0.967
rs182552448	1q42.13	227294125	T	C	0.01	0.83	-0.004	0.113	0.996	(0.798-1.243)	0.968
rs78534553	1q42.13	227302701	C	T	0.01	0.984	0.004	0.105	1.004	(0.817-1.233)	0.971
rs938257	1q42.13	227343129	C	T	0.199	0.986	0.001	0.025	1.001	(0.953-1.051)	0.972
rs61836468	1q42.13	227290539	A	G	0.156	0.965	0.001	0.028	1.001	(0.948-1.057)	0.974
rs12127665	1q42.13	227298165	A	G	0.157	0.961	-0.001	0.028	0.999	(0.946-1.055)	0.974
rs17545704	1q42.13	227292258	A	T	0.156	0.964	0.001	0.028	1.001	(0.948-1.057)	0.977
rs189476825	1q42.13	227320825	G	T	0.148	0.893	0.001	0.03	1.001	(0.944-1.062)	0.979
rs34169114	1q42.13	227295213	C	T	0.156	0.964	0.001	0.028	1.001	(0.948-1.057)	0.980
rs12128667	1q42.13	227299072	A	T	0.156	0.964	0.001	0.028	1.001	(0.948-1.057)	0.984
rs12131913	1q42.13	227304540	G	A	0.156	0.964	0.001	0.028	1.001	(0.948-1.057)	0.984
rs12751015	1q42.13	227305001	A	G	0.156	0.964	0.001	0.028	1.001	(0.948-1.057)	0.984
rs11586575	1q42.13	227308814	G	A	0.156	0.964	0.001	0.028	1.001	(0.948-1.057)	0.984
rs12121729	1q42.13	227331293	C	T	0.156	0.959	0	0.028	1	(0.947-1.056)	0.986
rs35156994	1q42.13	227288364	C	T	0.156	0.965	0	0.028	1	(0.947-1.056)	0.988
rs72748174	1q42.13	227273251	T	C	0.2	0.974	0	0.026	1	(0.95-1.052)	0.988
rs10495259	1q42.13	227310197	G	A	0.156	0.961	0	0.028	1	(0.947-1.056)	0.990
rs10495257	1q42.13	227312132	G	A	0.199	0.981	0	0.026	1	(0.95-1.052)	0.992
chr1:227350830:D	1q42.13	227350830	CAT	C	0.01	0.51	0	0.143	1	(0.756-1.323)	0.998
rs72748195	1q42.13	227306355	T	C	0.199	0.979	0	0.026	1	(0.95-1.052)	0.998
rs10127638	1q42.13	227272546	G	A	0.198	0.98	0	0.026	1	(0.95-1.052)	0.998
rs12134379	1q42.13	227325759	A	G	0.156	0.959	0	0.028	1	(0.947-1.056)	0.999
rs12136857	1q42.13	227312609	A	G	0.157	0.956	0	0.028	1	(0.947-1.056)	1.000
		NA			NA	NA	NA	NA	NA	(NA-NA)
chr2:100009234:I	2q11.2	100009234	C	CT	0.015	0.326	0.468	0.148	1.597	(1.195-2.134)	0.002
chr2:99997977:D	2q11.2	99997977	AGG	A	0.434	0.719	-0.073	0.024	0.93	(0.887-0.974)	0.002
rs11888134	2q11.2	100000533	A	G	0.505	0.89	-0.06	0.021	0.942	(0.904-0.981)	0.005
chr2:100006061:I	2q11.2	100006061	G	GAGTA	0.548	0.983	-0.057	0.02	0.945	(0.908-0.982)	0.005
rs6721297	2q11.2	99997981	G	T	0.454	0.729	-0.064	0.024	0.938	(0.895-0.983)	0.007
rs28382944	2q11.2	100028609	C	T	0.037	0.78	0.165	0.061	1.179	(1.046-1.329)	0.007
rs2305354	2q11.2	100019496	A	G	0.553	1	-0.054	0.02	0.947	(0.911-0.985)	0.008
chr2:99977162:D	2q11.2	99977162	TAGGAATGTAA	T	0.445	0.985	0.054	0.02	1.055	(1.015-1.098)	0.009
rs1376443	2q11.2	99995804	T	C	0.564	0.981	-0.054	0.021	0.947	(0.909-0.987)	0.009
rs11887109	2q11.2	100045184	A	G	0.554	0.992	-0.053	0.02	0.948	(0.912-0.986)	0.009
rs7586892	2q11.2	100002065	G	A	0.553	0.997	-0.053	0.02	0.948	(0.912-0.986)	0.010
rs6717515	2q11.2	100045275	T	C	0.553	0.997	-0.052	0.02	0.949	(0.913-0.987)	0.010
rs11123786	2q11.2	100011714	C	G	0.552	0.998	-0.052	0.02	0.949	(0.913-0.987)	0.010
rs7587419	2q11.2	100002490	G	A	0.553	0.997	-0.052	0.02	0.949	(0.913-0.987)	0.010
rs7561079	2q11.2	100001994	C	T	0.553	0.997	-0.052	0.02	0.949	(0.913-0.987)	0.010
rs7574135	2q11.2	100007403	A	T	0.553	0.998	-0.052	0.02	0.949	(0.913-0.987)	0.010
rs10187843	2q11.2	100006620	G	T	0.553	0.998	-0.052	0.02	0.949	(0.913-0.987)	0.010
rs12464535	2q11.2	99992187	T	C	0.553	0.995	-0.052	0.02	0.949	(0.913-0.987)	0.010
rs7558074	2q11.2	99992822	A	C	0.553	0.994	-0.052	0.02	0.949	(0.913-0.987)	0.010
rs3828316	2q11.2	100024819	G	T	0.552	0.999	-0.052	0.02	0.949	(0.913-0.987)	0.010
rs7601730	2q11.2	100025354	A	T	0.552	0.999	-0.052	0.02	0.949	(0.913-0.987)	0.010
rs4535093	2q11.2	100036158	A	G	0.553	1	-0.052	0.02	0.949	(0.913-0.987)	0.010
rs13389623	2q11.2	100008408	C	A	0.553	0.997	-0.052	0.02	0.949	(0.913-0.987)	0.010
rs2290256	2q11.2	99998561	C	T	0.553	0.996	-0.052	0.02	0.949	(0.913-0.987)	0.010
rs4851205	2q11.2	100032072	C	A	0.553	1	-0.052	0.02	0.949	(0.913-0.987)	0.010
rs2242037	2q11.2	100029106	T	C	0.553	1	-0.052	0.02	0.949	(0.913-0.987)	0.010
rs7579403	2q11.2	100012513	C	T	0.553	1	-0.052	0.02	0.949	(0.913-0.987)	0.010
rs7591212	2q11.2	99986644	T	C	0.446	0.989	0.052	0.02	1.053	(1.013-1.095)	0.010
rs3792152	2q11.2	100031551	A	G	0.553	1	-0.052	0.02	0.949	(0.913-0.987)	0.010
chr2:99988453:D	2q11.2	99988453	CA	C	0.554	0.989	-0.052	0.02	0.949	(0.913-0.987)	0.010
rs7585721	2q11.2	99989338	C	T	0.554	0.989	-0.052	0.02	0.949	(0.913-0.987)	0.010
rs1451243	2q11.2	100040280	A	T	0.552	0.999	-0.052	0.02	0.949	(0.913-0.987)	0.010
rs4850903	2q11.2	99984198	G	A	0.446	0.989	0.052	0.02	1.053	(1.013-1.095)	0.010
rs12623540	2q11.2	99975547	C	T	0.446	0.989	0.052	0.02	1.053	(1.013-1.095)	0.011
rs11683651	2q11.2	99970800	G	C	0.446	0.989	0.052	0.02	1.053	(1.013-1.095)	0.011
rs1901283	2q11.2	100060561	T	C	0.546	0.988	-0.052	0.02	0.949	(0.913-0.987)	0.011
rs3792146	2q11.2	100051522	C	T	0.549	0.996	-0.051	0.02	0.95	(0.914-0.988)	0.011
rs28382954	2q11.2	100026542	A	G	0.54	0.965	-0.052	0.021	0.949	(0.911-0.989)	0.011
rs7601470	2q11.2	99981670	G	T	0.447	0.988	0.052	0.02	1.053	(1.013-1.095)	0.011
rs3792149	2q11.2	100046943	A	C	0.549	0.996	-0.051	0.02	0.95	(0.914-0.988)	0.011
chr2:100066140:D	2q11.2	100066140	CT	C	0.547	0.993	-0.051	0.02	0.95	(0.914-0.988)	0.012
chr2:100052594:I	2q11.2	100052594	A	AGTTT	0.542	0.963	-0.052	0.021	0.949	(0.911-0.989)	0.012
rs7567674	2q11.2	100067578	G	A	0.55	1	-0.05	0.02	0.951	(0.915-0.989)	0.013
rs6542880	2q11.2	100053866	C	A	0.551	0.997	-0.05	0.02	0.951	(0.915-0.989)	0.013
rs10172752	2q11.2	100069385	T	G	0.55	1	-0.05	0.02	0.951	(0.915-0.989)	0.013
rs6542879	2q11.2	100047600	A	G	0.55	0.999	-0.05	0.02	0.951	(0.915-0.989)	0.013
rs7594838	2q11.2	100067554	C	T	0.55	1	-0.05	0.02	0.951	(0.915-0.989)	0.013
rs7598629	2q11.2	100059709	A	C	0.55	1	-0.05	0.02	0.951	(0.915-0.989)	0.013
rs1000409	2q11.2	100058189	A	G	0.55	1	-0.05	0.02	0.951	(0.915-0.989)	0.013
rs3087386	2q11.2	100055506	A	G	0.55	1	-0.05	0.02	0.951	(0.915-0.989)	0.013
rs2309585	2q11.2	100056617	C	T	0.55	1	-0.05	0.02	0.951	(0.915-0.989)	0.013
chr2:100054658:I	2q11.2	100054658	A	AAATT	0.551	0.995	-0.05	0.02	0.951	(0.915-0.989)	0.014
rs57977991	2q11.2	100060441	C	T	0.426	0.97	-0.051	0.021	0.95	(0.912-0.99)	0.014
chr2:100051316:I	2q11.2	100051316	C	CA	0.55	0.998	-0.05	0.02	0.951	(0.915-0.989)	0.014
rs12052986	2q11.2	99994960	C	G	0.438	0.99	-0.049	0.02	0.952	(0.916-0.99)	0.016
rs7589365	2q11.2	99990324	C	T	0.438	0.985	-0.049	0.02	0.952	(0.916-0.99)	0.017
rs1839667	2q11.2	100064264	C	T	0.436	0.999	-0.048	0.02	0.953	(0.916-0.991)	0.018
rs3792142	2q11.2	100057208	C	A	0.423	0.965	-0.049	0.021	0.952	(0.914-0.992)	0.018
rs60335031	2q11.2	100060483	C	T	0.41	0.928	-0.05	0.021	0.951	(0.913-0.991)	0.019
rs10865031	2q11.2	100063923	C	T	0.433	0.989	-0.048	0.02	0.953	(0.916-0.991)	0.019
rs7563462	2q11.2	100063708	T	C	0.436	1	-0.047	0.02	0.954	(0.917-0.992)	0.020
rs3792137	2q11.2	100061748	C	A	0.436	1	-0.047	0.02	0.954	(0.917-0.992)	0.020
rs4851206	2q11.2	100068069	T	C	0.436	1	-0.047	0.02	0.954	(0.917-0.992)	0.020
chr2:100069052:D	2q11.2	100069052	CTGTT	C	0.436	1	-0.047	0.02	0.954	(0.917-0.992)	0.020
rs11899745	2q11.2	100064072	A	G	0.436	0.999	-0.047	0.02	0.954	(0.917-0.992)	0.020
rs3792144	2q11.2	100056736	T	C	0.436	1	-0.047	0.02	0.954	(0.917-0.992)	0.020
rs7572779	2q11.2	100063844	G	C	0.432	0.989	-0.048	0.02	0.953	(0.916-0.991)	0.020
rs2122748	2q11.2	100065369	T	A	0.435	0.999	-0.047	0.02	0.954	(0.917-0.992)	0.020
rs1451246	2q11.2	100064283	C	A	0.436	1	-0.047	0.02	0.954	(0.917-0.992)	0.021
rs7563455	2q11.2	100063681	T	C	0.435	0.999	-0.046	0.02	0.955	(0.918-0.993)	0.023
rs3087401	2q11.2	100020945	C	T	0.028	0.443	-0.206	0.091	0.814	(0.681-0.973)	0.024
rs146302310	2q11.2	100043557	C	T	0.018	0.871	-0.177	0.081	0.838	(0.715-0.982)	0.029
chr2:100000326:D	2q11.2	100000326	ACT	A	0.407	0.928	-0.045	0.021	0.956	(0.917-0.996)	0.034
rs59178618	2q11.2	99993701	G	A	0.418	0.978	-0.043	0.021	0.958	(0.919-0.998)	0.038
rs3791212	2q11.2	99982201	G	T	0.427	0.974	-0.043	0.021	0.958	(0.919-0.998)	0.039
rs62155771	2q11.2	99981637	T	A	0.018	0.461	-0.231	0.112	0.794	(0.637-0.989)	0.040
rs149361812	2q11.2	100008131	A	T	0.006	0.411	-0.418	0.204	0.658	(0.441-0.982)	0.041
rs17763586	2q11.2	100032911	A	G	0.008	0.711	-0.286	0.14	0.751	(0.571-0.988)	0.041
chr2:99988452:D	2q11.2	99988452	AC	A	0.454	0.76	-0.047	0.023	0.954	(0.912-0.998)	0.042
chr2:100019612:D	2q11.2	100019612	TG	T	0.42	0.993	-0.041	0.021	0.96	(0.921-1)	0.045
rs7606977	2q11.2	99991481	A	G	0.422	0.989	-0.041	0.021	0.96	(0.921-1)	0.047
rs7558062	2q11.2	99992784	A	G	0.422	0.989	-0.041	0.021	0.96	(0.921-1)	0.047
rs11884686	2q11.2	99997493	T	C	0.422	0.989	-0.041	0.021	0.96	(0.921-1)	0.047
rs28382946	2q11.2	100028553	G	A	0.421	0.997	-0.04	0.02	0.961	(0.924-0.999)	0.048
rs58958283	2q11.2	100009924	G	A	0.421	0.997	-0.04	0.02	0.961	(0.924-0.999)	0.048
rs7593274	2q11.2	100009043	G	A	0.421	0.998	-0.04	0.02	0.961	(0.924-0.999)	0.049
rs2290261	2q11.2	100021184	A	G	0.421	1	-0.04	0.02	0.961	(0.924-0.999)	0.049
rs6711073	2q11.2	100020742	G	A	0.421	1	-0.04	0.02	0.961	(0.924-0.999)	0.049
rs1053544	2q11.2	100022270	G	A	0.421	1	-0.04	0.02	0.961	(0.924-0.999)	0.049
rs717454	2q11.2	100022772	T	C	0.421	1	-0.04	0.02	0.961	(0.924-0.999)	0.049
rs7560996	2q11.2	100025483	G	A	0.421	1	-0.04	0.02	0.961	(0.924-0.999)	0.049
rs3749087	2q11.2	100026940	A	G	0.421	1	-0.04	0.02	0.961	(0.924-0.999)	0.049
rs7597141	2q11.2	100034331	A	G	0.421	1	-0.04	0.02	0.961	(0.924-0.999)	0.049
rs4851204	2q11.2	99991182	A	G	0.423	0.984	-0.04	0.021	0.961	(0.922-1.001)	0.049
rs7602923	2q11.2	99990375	A	G	0.424	0.977	-0.04	0.021	0.961	(0.922-1.001)	0.050
rs7597045	2q11.2	99992572	C	G	0.422	0.988	-0.04	0.021	0.961	(0.922-1.001)	0.050
rs61103312	2q11.2	100005612	T	A	0.422	0.996	-0.04	0.02	0.961	(0.924-0.999)	0.050
rs1584648	2q11.2	100001077	G	A	0.421	0.994	-0.04	0.02	0.961	(0.924-0.999)	0.050
rs7584127	2q11.2	100001941	G	A	0.422	0.996	-0.04	0.02	0.961	(0.924-0.999)	0.051
rs11892441	2q11.2	100005318	G	A	0.422	0.996	-0.04	0.02	0.961	(0.924-0.999)	0.051
rs1584647	2q11.2	100001109	A	G	0.421	0.995	-0.04	0.02	0.961	(0.924-0.999)	0.051
rs2309617	2q11.2	99976291	C	A	0.423	0.981	-0.04	0.021	0.961	(0.922-1.001)	0.052
rs2290255	2q11.2	99999097	C	A	0.422	0.994	-0.04	0.02	0.961	(0.924-0.999)	0.052
chr2:99988457:D	2q11.2	99988457	AT	A	0.445	0.761	-0.045	0.023	0.956	(0.914-1)	0.052
rs6720885	2q11.2	99971289	A	G	0.422	0.977	-0.04	0.021	0.961	(0.922-1.001)	0.052
rs2309576	2q11.2	99972355	C	T	0.423	0.98	-0.04	0.021	0.961	(0.922-1.001)	0.052
rs6732750	2q11.2	100003890	T	C	0.421	0.994	-0.04	0.02	0.961	(0.924-0.999)	0.053
rs17022629	2q11.2	100005874	C	T	0.423	0.99	-0.04	0.021	0.961	(0.922-1.001)	0.053
rs2290257	2q11.2	100016713	G	C	0.421	0.996	-0.039	0.02	0.962	(0.925-1)	0.054
rs142397096	2q11.2	100027104	C	T	0.008	0.613	-0.278	0.147	0.757	(0.568-1.01)	0.057
rs147396200	2q11.2	100042919	T	A	0.007	0.701	-0.267	0.145	0.766	(0.576-1.017)	0.066
rs188407828	2q11.2	99992094	C	T	0.008	0.488	-0.305	0.167	0.737	(0.531-1.023)	0.068
rs146222963	2q11.2	99979160	T	C	0.016	0.937	-0.145	0.083	0.865	(0.735-1.018)	0.081
rs144721231	2q11.2	99973188	T	A	0.016	0.937	-0.145	0.083	0.865	(0.735-1.018)	0.081
rs41280587	2q11.2	99976813	G	A	0.016	0.937	-0.145	0.083	0.865	(0.735-1.018)	0.081
rs150269958	2q11.2	99977196	G	A	0.016	0.937	-0.145	0.083	0.865	(0.735-1.018)	0.081
rs145745795	2q11.2	99978668	C	T	0.016	0.937	-0.145	0.083	0.865	(0.735-1.018)	0.081
rs78875872	2q11.2	99993160	T	C	0.016	0.937	-0.145	0.083	0.865	(0.735-1.018)	0.081
rs78941266	2q11.2	99979826	T	G	0.016	0.937	-0.145	0.083	0.865	(0.735-1.018)	0.081
rs117138860	2q11.2	99980811	G	T	0.016	0.937	-0.145	0.083	0.865	(0.735-1.018)	0.081
rs117926326	2q11.2	99987429	A	G	0.016	0.937	-0.145	0.083	0.865	(0.735-1.018)	0.081
rs118142821	2q11.2	99989945	C	T	0.016	0.937	-0.145	0.083	0.865	(0.735-1.018)	0.081
rs4341989	2q11.2	100046783	C	T	0.302	1	-0.038	0.022	0.963	(0.922-1.005)	0.082
rs190737561	2q11.2	99973840	G	A	0.006	0.351	0.389	0.228	1.476	(0.944-2.307)	0.088
chr2:99998165:I	2q11.2	99998165	C	CT	0.016	0.967	-0.14	0.083	0.869	(0.739-1.023)	0.092
rs78796718	2q11.2	100005293	C	T	0.016	0.967	-0.14	0.083	0.869	(0.739-1.023)	0.092
rs28382916	2q11.2	100041658	C	T	0.015	0.678	0.168	0.1	1.183	(0.972-1.439)	0.093
rs189917399	2q11.2	99979014	T	C	0.017	0.896	-0.139	0.083	0.87	(0.74-1.024)	0.094
rs11885942	2q11.2	100004165	A	G	0.28	0.984	-0.037	0.023	0.964	(0.921-1.008)	0.104
rs28382922	2q11.2	100039562	C	T	0.016	0.96	-0.135	0.083	0.874	(0.743-1.028)	0.105
rs28382925	2q11.2	100038507	T	C	0.016	0.96	-0.135	0.083	0.874	(0.743-1.028)	0.105
rs28382931	2q11.2	100037052	G	C	0.016	0.959	-0.135	0.083	0.874	(0.743-1.028)	0.106
rs187294592	2q11.2	99974719	G	A	0.006	0.58	-0.286	0.177	0.751	(0.531-1.063)	0.106
rs62155769	2q11.2	99978950	T	A	0.266	0.919	-0.039	0.024	0.962	(0.918-1.008)	0.106
rs142917368	2q11.2	100042871	T	C	0.016	0.964	-0.135	0.084	0.874	(0.741-1.03)	0.106
rs80261526	2q11.2	100029133	G	C	0.016	0.959	-0.134	0.083	0.875	(0.743-1.029)	0.108
rs28382959	2q11.2	100024771	C	T	0.016	0.959	-0.134	0.083	0.875	(0.743-1.029)	0.108
rs140470647	2q11.2	100027745	G	A	0.016	0.959	-0.134	0.083	0.875	(0.743-1.029)	0.108
rs186099426	2q11.2	100023970	C	T	0.016	0.959	-0.134	0.083	0.875	(0.743-1.029)	0.108
rs12053237	2q11.2	100012456	T	C	0.016	0.959	-0.134	0.083	0.875	(0.743-1.029)	0.108
rs28382986	2q11.2	100015563	C	T	0.016	0.959	-0.134	0.083	0.875	(0.743-1.029)	0.108
rs117849402	2q11.2	100023607	G	A	0.016	0.959	-0.134	0.083	0.875	(0.743-1.029)	0.108
rs28382975	2q11.2	100018437	T	C	0.016	0.959	-0.134	0.083	0.875	(0.743-1.029)	0.108
chr2:100019059:D	2q11.2	100019059	AGAC	A	0.016	0.959	-0.134	0.083	0.875	(0.743-1.029)	0.108
chr2:100019063:D	2q11.2	100019063	GACT	G	0.016	0.959	-0.134	0.083	0.875	(0.743-1.029)	0.108
rs3197957	2q11.2	100010810	A	G	0.016	0.959	-0.134	0.083	0.875	(0.743-1.029)	0.108
chr2:100043849:D	2q11.2	100043849	TAA	T	0.015	0.972	-0.135	0.084	0.874	(0.741-1.03)	0.109
rs148197801	2q11.2	99985280	A	G	0.011	0.748	-0.177	0.11	0.838	(0.675-1.039)	0.110
rs28382914	2q11.2	100045071	A	T	0.015	0.988	-0.134	0.084	0.875	(0.742-1.031)	0.113
rs146529914	2q11.2	100018076	G	A	0.016	0.955	-0.131	0.083	0.877	(0.746-1.032)	0.114
rs28382910	2q11.2	100045511	T	C	0.015	0.993	-0.133	0.084	0.875	(0.743-1.032)	0.115
rs28382901	2q11.2	100047335	T	C	0.015	0.997	-0.133	0.084	0.875	(0.743-1.032)	0.116
chr2:100047802:I	2q11.2	100047802	A	AC	0.015	0.997	-0.133	0.084	0.875	(0.743-1.032)	0.116
rs141172704	2q11.2	100049479	G	A	0.015	0.997	-0.133	0.084	0.875	(0.743-1.032)	0.116
rs10496336	2q11.2	99996165	A	G	0.279	0.976	-0.035	0.023	0.966	(0.923-1.01)	0.119
rs2309618	2q11.2	99974473	G	A	0.278	0.97	-0.036	0.023	0.965	(0.922-1.009)	0.120
chr2:100066220:D	2q11.2	100066220	AG	A	0.29	0.999	-0.035	0.022	0.966	(0.925-1.008)	0.120
rs3087403	2q11.2	100058870	C	T	0.29	1	-0.034	0.022	0.967	(0.926-1.009)	0.123
rs9753373	2q11.2	100000654	C	T	0.16	0.584	-0.055	0.036	0.946	(0.882-1.016)	0.129
rs6714650	2q11.2	100033794	C	G	0.287	0.982	-0.034	0.022	0.967	(0.926-1.009)	0.130
rs3792143	2q11.2	100057020	C	T	0.281	0.99	-0.034	0.023	0.967	(0.924-1.011)	0.133
chr2:99978536:I	2q11.2	99978536	A	AT	0.018	0.859	-0.122	0.082	0.885	(0.754-1.039)	0.137
rs2305352	2q11.2	100015124	C	G	0.287	0.992	-0.033	0.022	0.968	(0.927-1.01)	0.138
rs28382977	2q11.2	100018304	G	A	0.288	0.994	-0.033	0.022	0.968	(0.927-1.01)	0.141
rs12474305	2q11.2	100014394	G	T	0.28	0.961	-0.033	0.023	0.968	(0.925-1.012)	0.144
rs4851203	2q11.2	99986932	T	C	0.287	0.966	-0.033	0.023	0.968	(0.925-1.012)	0.144
chr2:100034646:D	2q11.2	100034646	TA	T	0.287	0.992	-0.033	0.022	0.968	(0.927-1.01)	0.145
rs3792150	2q11.2	100041849	G	A	0.287	0.993	-0.032	0.022	0.969	(0.928-1.011)	0.147
rs28382877	2q11.2	100056682	C	T	0.015	0.998	-0.122	0.085	0.885	(0.749-1.046)	0.149
rs28382870	2q11.2	100059628	C	T	0.015	0.998	-0.122	0.085	0.885	(0.749-1.046)	0.149
rs28369961	2q11.2	100066780	T	C	0.015	0.998	-0.122	0.085	0.885	(0.749-1.046)	0.149
chr2:100057585:D	2q11.2	100057585	CGTATTCT	C	0.272	0.969	-0.033	0.023	0.968	(0.925-1.012)	0.155
rs149477923	2q11.2	100063111	C	T	0.145	0.945	0.041	0.03	1.042	(0.982-1.105)	0.162
rs7602535	2q11.2	100039664	C	T	0.924	1	-0.053	0.038	0.948	(0.88-1.022)	0.163
rs2141907	2q11.2	99975725	G	A	0.258	0.922	-0.033	0.024	0.968	(0.923-1.014)	0.167
rs112308324	2q11.2	100003669	C	T	0.019	0.553	0.139	0.101	1.149	(0.943-1.401)	0.168
rs11896520	2q11.2	99995517	C	T	0.271	0.965	-0.031	0.023	0.969	(0.927-1.014)	0.173
chr2:100014391:D	2q11.2	100014391	TG	T	0.277	0.959	-0.031	0.023	0.969	(0.927-1.014)	0.178
rs28382985	2q11.2	100015613	A	G	0.006	0.362	0.299	0.229	1.349	(0.861-2.112)	0.191
rs34196915	2q11.2	99975724	C	T	0.076	0.924	0.051	0.039	1.052	(0.975-1.136)	0.194
rs12479064	2q11.2	100046038	C	T	0.231	1	-0.031	0.024	0.969	(0.925-1.016)	0.199
rs1451245	2q11.2	100057489	G	A	0.146	1	-0.037	0.028	0.964	(0.912-1.018)	0.199
rs3792135	2q11.2	100062163	T	C	0.146	1	-0.036	0.028	0.965	(0.913-1.019)	0.200
rs17022634	2q11.2	100010044	T	C	0.156	1	0.035	0.028	1.036	(0.98-1.094)	0.203
rs12623620	2q11.2	99975870	C	A	0.155	0.979	0.035	0.028	1.036	(0.98-1.094)	0.209
chr2:100026324:I	2q11.2	100026324	C	CA	0.013	0.571	-0.144	0.118	0.866	(0.687-1.091)	0.221
chr2:100002984:I	2q11.2	100002984	C	CTG	0.025	0.484	0.111	0.092	1.117	(0.933-1.338)	0.231
rs116061811	2q11.2	100043117	T	C	0.017	0.484	-0.132	0.112	0.876	(0.704-1.091)	0.236
chr2:100034649:D	2q11.2	100034649	AT	A	0.259	0.909	-0.027	0.024	0.973	(0.929-1.02)	0.257
rs111444953	2q11.2	100032182	T	A	0.016	0.545	0.122	0.11	1.13	(0.911-1.402)	0.268
rs2290258	2q11.2	100017074	A	C	0.12	0.867	0.035	0.033	1.036	(0.971-1.105)	0.294
rs3792148	2q11.2	100051277	A	G	0.119	0.862	0.034	0.034	1.035	(0.968-1.106)	0.306
rs3791213	2q11.2	99982730	T	C	0.134	0.961	-0.03	0.03	0.97	(0.915-1.029)	0.313
rs12233086	2q11.2	99978048	G	A	0.134	0.958	-0.03	0.03	0.97	(0.915-1.029)	0.317
rs72815086	2q11.2	100033400	T	G	0.129	0.973	-0.03	0.031	0.97	(0.913-1.031)	0.322
rs9941566	2q11.2	100039899	G	A	0.132	0.99	-0.028	0.03	0.972	(0.917-1.031)	0.343
rs146377515	2q11.2	100017755	A	G	0.007	0.37	-0.191	0.202	0.826	(0.556-1.227)	0.345
rs6727483	2q11.2	100045247	G	A	0.133	0.989	-0.028	0.03	0.972	(0.917-1.031)	0.346
rs72956346	2q11.2	99991922	C	T	0.134	0.963	-0.028	0.03	0.972	(0.917-1.031)	0.352
rs17022653	2q11.2	100028289	A	G	0.132	0.998	-0.028	0.03	0.972	(0.917-1.031)	0.355
rs10182492	2q11.2	100042138	T	G	0.132	0.998	-0.028	0.03	0.972	(0.917-1.031)	0.356
rs3792151	2q11.2	100041647	A	C	0.132	0.998	-0.028	0.03	0.972	(0.917-1.031)	0.356
rs139292742	2q11.2	100035863	G	A	0.01	0.606	-0.124	0.134	0.883	(0.679-1.149)	0.356
rs17022663	2q11.2	100033505	G	C	0.132	0.998	-0.027	0.03	0.973	(0.918-1.032)	0.358
rs28382955	2q11.2	100025460	A	G	0.132	0.998	-0.027	0.03	0.973	(0.918-1.032)	0.358
rs13420293	2q11.2	100027789	C	T	0.132	0.998	-0.027	0.03	0.973	(0.918-1.032)	0.358
rs13394927	2q11.2	100022617	G	A	0.132	1	-0.027	0.03	0.973	(0.918-1.032)	0.364
rs72956387	2q11.2	100028890	C	G	0.133	0.993	-0.027	0.03	0.973	(0.918-1.032)	0.366
rs13402784	2q11.2	100032449	T	C	0.133	0.988	-0.027	0.03	0.973	(0.918-1.032)	0.368
rs2242036	2q11.2	100010685	A	G	0.133	0.989	-0.026	0.03	0.974	(0.919-1.033)	0.378
rs11123785	2q11.2	100011675	C	T	0.133	0.99	-0.026	0.03	0.974	(0.919-1.033)	0.378
rs28382892	2q11.2	100053295	T	C	0.13	0.984	-0.026	0.03	0.974	(0.919-1.033)	0.395
rs141968131	2q11.2	100024011	T	G	0.008	0.532	0.136	0.16	1.146	(0.837-1.568)	0.395
rs28382949	2q11.2	100028112	C	T	0.133	0.992	-0.025	0.03	0.975	(0.92-1.034)	0.398
rs12233126	2q11.2	100012200	T	A	0.138	0.959	-0.025	0.03	0.975	(0.92-1.034)	0.400
rs3792136	2q11.2	100061773	G	A	0.132	1	-0.025	0.03	0.975	(0.92-1.034)	0.406
rs75105166	2q11.2	99973747	G	T	0.021	0.458	0.083	0.103	1.087	(0.888-1.33)	0.424
chr2:100056264:I	2q11.2	100056264	T	TA	0.014	0.468	-0.101	0.127	0.904	(0.705-1.159)	0.425
rs114408758	2q11.2	99971734	C	A	0.017	0.873	0.067	0.084	1.069	(0.907-1.261)	0.426
rs11695422	2q11.2	100053645	G	A	0.026	0.47	-0.069	0.092	0.933	(0.779-1.118)	0.449
rs12053566	2q11.2	99996670	T	A	0.139	0.942	-0.022	0.03	0.978	(0.922-1.037)	0.459
rs78908017	2q11.2	99977342	C	A	0.087	0.841	-0.028	0.039	0.972	(0.901-1.05)	0.469
rs183748755	2q11.2	100031668	T	G	0.008	0.407	0.124	0.181	1.132	(0.794-1.614)	0.491
rs41280589	2q11.2	100019256	A	T	0.008	0.407	0.124	0.181	1.132	(0.794-1.614)	0.491
chr2:100035441:D	2q11.2	100035441	TCA	T	0.019	0.933	-0.052	0.076	0.949	(0.818-1.102)	0.498
rs55769962	2q11.2	100014365	A	G	0.037	0.824	0.039	0.059	1.04	(0.926-1.167)	0.505
rs184996344	2q11.2	100069446	G	A	0.006	0.561	0.106	0.169	1.112	(0.798-1.548)	0.528
rs3087395	2q11.2	100037832	T	C	0.024	0.647	-0.049	0.083	0.952	(0.809-1.12)	0.554
rs74614774	2q11.2	100060006	G	A	0.006	0.418	0.126	0.214	1.134	(0.746-1.725)	0.556
rs147914696	2q11.2	99973299	C	G	0.032	0.571	-0.044	0.075	0.957	(0.826-1.108)	0.560
rs72815078	2q11.2	100003000	T	G	0.023	0.475	-0.053	0.097	0.948	(0.784-1.147)	0.587
rs191074466	2q11.2	99979388	A	G	0.021	0.759	0.043	0.081	1.044	(0.891-1.224)	0.594
rs57550691	2q11.2	99991668	C	T	0.104	0.892	-0.018	0.035	0.982	(0.917-1.052)	0.597
chr2:100013950:I	2q11.2	100013950	C	CCA	0.112	0.969	-0.016	0.032	0.984	(0.924-1.048)	0.628
chr2:100017514:D	2q11.2	100017514	ATAAT	A	0.026	0.621	-0.038	0.08	0.963	(0.823-1.126)	0.638
rs3792138	2q11.2	100060999	A	C	0.023	0.671	-0.039	0.083	0.962	(0.817-1.132)	0.639
rs55720283	2q11.2	99984197	C	T	0.009	0.69	0.061	0.131	1.063	(0.822-1.374)	0.640
rs58123905	2q11.2	99999882	T	C	0.104	0.9	-0.016	0.035	0.984	(0.919-1.054)	0.640
chr2:99999483:D	2q11.2	99999483	TTATTGTGCTTCACTA	T	0.037	0.578	-0.032	0.071	0.969	(0.843-1.113)	0.652
rs112033720	2q11.2	99983416	G	A	0.01	0.5	-0.064	0.144	0.938	(0.707-1.244)	0.658
rs145805034	2q11.2	99995613	A	G	0.01	0.5	-0.064	0.144	0.938	(0.707-1.244)	0.658
rs185776830	2q11.2	100058584	C	G	0.011	0.674	-0.05	0.116	0.951	(0.758-1.194)	0.665
rs115741164	2q11.2	99988008	A	G	0.01	0.38	-0.07	0.164	0.932	(0.676-1.286)	0.669
chr2:100023919:D	2q11.2	100023919	AAGG	A	0.012	0.447	-0.059	0.138	0.943	(0.719-1.235)	0.671
chr2:100048790:I	2q11.2	100048790	C	CT	0.04	0.398	-0.033	0.081	0.968	(0.826-1.134)	0.681
rs13429185	2q11.2	100045783	C	T	0.117	0.996	-0.012	0.032	0.988	(0.928-1.052)	0.699
rs57093686	2q11.2	100018038	C	T	0.008	0.725	-0.052	0.134	0.949	(0.73-1.234)	0.700
chr2:100000789:I	2q11.2	100000789	C	CA	0.115	0.992	-0.012	0.032	0.988	(0.928-1.052)	0.709
rs28382945	2q11.2	100028555	C	T	0.116	0.993	-0.012	0.032	0.988	(0.928-1.052)	0.713
rs13401163	2q11.2	99999611	G	A	0.116	0.993	-0.012	0.032	0.988	(0.928-1.052)	0.714
chr2:100000238:I	2q11.2	100000238	A	AG	0.116	0.993	-0.012	0.032	0.988	(0.928-1.052)	0.714
rs28745279	2q11.2	100018271	G	A	0.116	0.993	-0.012	0.032	0.988	(0.928-1.052)	0.715
rs13426758	2q11.2	100039956	C	T	0.116	0.992	-0.012	0.032	0.988	(0.928-1.052)	0.715
chr2:100031110:D	2q11.2	100031110	CTT	C	0.116	0.993	-0.012	0.032	0.988	(0.928-1.052)	0.715
rs28382947	2q11.2	100028475	C	T	0.116	0.993	-0.012	0.032	0.988	(0.928-1.052)	0.715
rs10180688	2q11.2	100004176	G	A	0.116	0.993	-0.012	0.032	0.988	(0.928-1.052)	0.716
chr2:100023858:I	2q11.2	100023858	C	CA	0.116	0.992	-0.011	0.032	0.989	(0.929-1.053)	0.720
rs62155770	2q11.2	99981222	A	G	0.046	0.979	0.017	0.049	1.017	(0.924-1.12)	0.728
rs17763718	2q11.2	100036592	G	T	0.046	1	0.017	0.048	1.017	(0.926-1.117)	0.729
rs149739573	2q11.2	100026536	G	A	0.008	0.341	-0.067	0.194	0.935	(0.639-1.368)	0.730
rs72815080	2q11.2	100003812	G	A	0.014	0.581	0.038	0.113	1.039	(0.832-1.296)	0.738
rs6726711	2q11.2	99977221	T	A	0.884	0.977	0.01	0.032	1.01	(0.949-1.075)	0.743
rs1882598	2q11.2	99981862	A	G	0.884	0.977	0.01	0.032	1.01	(0.949-1.075)	0.743
rs3828162	2q11.2	99976564	A	G	0.886	0.971	0.01	0.032	1.01	(0.949-1.075)	0.744
rs13001438	2q11.2	99969834	A	C	0.885	0.97	0.01	0.032	1.01	(0.949-1.075)	0.749
rs10175852	2q11.2	100055033	C	A	0.114	0.998	-0.01	0.032	0.99	(0.93-1.054)	0.750
rs28369966	2q11.2	100065221	G	T	0.01	0.316	0.056	0.177	1.058	(0.748-1.496)	0.751
rs3087387	2q11.2	100017868	A	G	0.007	0.802	-0.041	0.132	0.96	(0.741-1.243)	0.756
chr2:100064771:I	2q11.2	100064771	A	AT	0.113	0.989	-0.01	0.032	0.99	(0.93-1.054)	0.759
rs13416265	2q11.2	100061324	C	T	0.113	0.989	-0.01	0.032	0.99	(0.93-1.054)	0.759
rs13432046	2q11.2	100067456	A	G	0.114	0.999	-0.009	0.032	0.991	(0.931-1.055)	0.770
rs10210257	2q11.2	100066845	T	C	0.114	0.999	-0.009	0.032	0.991	(0.931-1.055)	0.770
rs10210346	2q11.2	100067097	A	C	0.114	0.998	-0.009	0.032	0.991	(0.931-1.055)	0.770
rs10207435	2q11.2	100060304	T	G	0.114	0.999	-0.009	0.032	0.991	(0.931-1.055)	0.771
rs72815074	2q11.2	99989348	T	A	0.116	0.984	-0.009	0.032	0.991	(0.931-1.055)	0.771
rs10179435	2q11.2	100056332	C	T	0.114	0.999	-0.009	0.032	0.991	(0.931-1.055)	0.771
rs3087399	2q11.2	100055158	T	C	0.114	0.999	-0.009	0.032	0.991	(0.931-1.055)	0.771
chr2:99991580:D	2q11.2	99991580	CTG	C	0.116	0.984	-0.009	0.032	0.991	(0.931-1.055)	0.771
rs10496337	2q11.2	100047662	C	T	0.114	0.998	-0.009	0.032	0.991	(0.931-1.055)	0.773
rs13427424	2q11.2	100065366	T	G	0.113	0.987	-0.009	0.032	0.991	(0.931-1.055)	0.774
rs7582085	2q11.2	100054140	T	A	0.114	0.999	-0.009	0.032	0.991	(0.931-1.055)	0.774
rs7582133	2q11.2	100053523	C	A	0.114	0.998	-0.009	0.032	0.991	(0.931-1.055)	0.777
rs13419448	2q11.2	100052917	T	C	0.114	0.998	-0.009	0.032	0.991	(0.931-1.055)	0.778
rs9308819	2q11.2	100016849	G	A	0.116	1	-0.009	0.032	0.991	(0.931-1.055)	0.785
rs13409359	2q11.2	100050740	A	C	0.115	0.996	-0.009	0.032	0.991	(0.931-1.055)	0.788
rs10186223	2q11.2	100058424	C	T	0.114	1	-0.008	0.032	0.992	(0.932-1.056)	0.792
rs6723062	2q11.2	100041565	T	C	0.008	0.82	-0.031	0.129	0.969	(0.753-1.248)	0.811
chr2:100047989:D	2q11.2	100047989	CAACT	C	0.008	0.825	-0.031	0.128	0.969	(0.754-1.246)	0.811
chr2:100004905:I	2q11.2	100004905	T	TTG	0.105	0.928	-0.007	0.034	0.993	(0.929-1.061)	0.827
rs11123784	2q11.2	99975050	T	C	0.878	0.934	0.007	0.032	1.007	(0.946-1.072)	0.829
rs9973846	2q11.2	100064180	T	C	0.107	0.956	-0.006	0.033	0.994	(0.932-1.06)	0.855
rs140700980	2q11.2	99982745	T	G	0.01	0.529	0.025	0.143	1.025	(0.775-1.357)	0.863
rs148421640	2q11.2	100059374	T	C	0.007	0.364	-0.027	0.212	0.973	(0.642-1.475)	0.899
rs76494502	2q11.2	100043067	A	C	0.007	0.363	-0.025	0.212	0.975	(0.644-1.478)	0.906
rs12989521	2q11.2	99979501	T	C	0.876	0.929	0.003	0.032	1.003	(0.942-1.068)	0.916
rs181128058	2q11.2	99984009	C	T	0.011	0.679	-0.012	0.118	0.988	(0.784-1.245)	0.922
rs140951041	2q11.2	99977048	G	A	0.01	0.533	0.013	0.138	1.013	(0.773-1.328)	0.922
rs3087385	2q11.2	100027151	G	C	0.016	0.364	-0.012	0.132	0.988	(0.763-1.28)	0.928
rs10179343	2q11.2	99993176	G	A	0.11	0.953	-0.003	0.033	0.997	(0.935-1.064)	0.928
chr2:100064179:I	2q11.2	100064179	T	TC	0.108	0.962	0.002	0.033	1.002	(0.939-1.069)	0.946
rs77050206	2q11.2	100020037	A	G	0.011	0.468	0.009	0.143	1.009	(0.762-1.335)	0.951
rs1922626	2q11.2	99983005	G	T	0.906	0.933	0.002	0.036	1.002	(0.934-1.075)	0.957
rs145966705	2q11.2	99974678	C	T	0.01	0.531	-0.004	0.145	0.996	(0.75-1.323)	0.975
rs138310823	2q11.2	100069380	G	A	0.007	0.389	0.004	0.195	1.004	(0.685-1.471)	0.985
rs149952341	2q11.2	99975476	A	G	0.007	0.338	-0.004	0.207	0.996	(0.664-1.494)	0.985
rs116430923	2q11.2	99970116	G	A	0.007	0.354	0.003	0.212	1.003	(0.662-1.52)	0.988
		NA			NA	NA	NA	NA	NA	(NA-NA)
rs138931882	2p23.2	28368818	T	C	0.009	0.698	0.379	0.129	1.461	(1.134-1.881)	0.003
rs184637812	2p23.2	28342828	C	T	0.009	0.686	0.373	0.13	1.452	(1.125-1.873)	0.004
rs6721310	2p23.2	28319320	T	C	0.661	1	-0.06	0.021	0.942	(0.904-0.981)	0.005
rs75655975	2p23.2	28333704	G	A	0.009	0.705	0.321	0.128	1.379	(1.073-1.772)	0.012
rs186424424	2p23.2	28335056	C	T	0.335	0.808	-0.055	0.024	0.946	(0.903-0.992)	0.020
rs2063018	2p23.2	28318008	A	G	0.288	1	0.051	0.022	1.052	(1.008-1.099)	0.022
rs72814441	2p23.2	28317880	T	G	0.042	0.767	-0.13	0.057	0.878	(0.785-0.982)	0.022
rs17758988	2p23.2	28311121	A	G	0.287	0.993	0.05	0.022	1.051	(1.007-1.098)	0.026
rs7597604	2p23.2	28362207	A	G	0.263	0.882	0.054	0.024	1.055	(1.007-1.106)	0.027
rs183727939	2p23.2	28323551	T	C	0.007	0.816	-0.295	0.136	0.745	(0.57-0.972)	0.031
rs79627684	2p23.2	28342083	G	A	0.015	0.73	0.206	0.096	1.229	(1.018-1.483)	0.031
rs6705961	2p23.2	28325201	C	T	0.427	1	-0.044	0.02	0.957	(0.92-0.995)	0.032
rs13395259	2p23.2	28319296	C	T	0.409	1	-0.044	0.02	0.957	(0.92-0.995)	0.032
rs7558946	2p23.2	28320181	C	T	0.409	1	-0.043	0.02	0.958	(0.921-0.996)	0.034
chr2:28301210:D	2p23.2	28301210	GC	G	0.428	0.941	-0.044	0.021	0.957	(0.918-0.997)	0.035
rs79667436	2p23.2	28330433	T	C	0.295	0.978	0.047	0.022	1.048	(1.004-1.094)	0.036
rs62140430	2p23.2	28330639	C	A	0.295	0.978	0.047	0.022	1.048	(1.004-1.094)	0.036
rs11695353	2p23.2	28292773	G	A	0.221	0.96	-0.052	0.025	0.949	(0.904-0.997)	0.037
rs114371299	2p23.2	28292527	C	T	0.006	0.902	-0.285	0.138	0.752	(0.574-0.986)	0.039
rs6752141	2p23.2	28332148	T	C	0.987	0.568	0.241	0.117	1.273	(1.012-1.6)	0.039
rs62140431	2p23.2	28332751	A	G	0.295	0.977	0.046	0.022	1.047	(1.003-1.093)	0.039
rs72814450	2p23.2	28334445	C	G	0.295	0.977	0.046	0.022	1.047	(1.003-1.093)	0.040
rs139751340	2p23.2	28307639	C	T	0.011	0.965	0.201	0.099	1.223	(1.007-1.484)	0.043
rs184471508	2p23.2	28336296	T	G	0.012	0.562	-0.246	0.122	0.782	(0.616-0.993)	0.043
rs146083994	2p23.2	28288975	G	A	0.035	0.763	-0.125	0.062	0.882	(0.782-0.997)	0.045
rs141780908	2p23.2	28337704	G	C	0.013	0.982	0.182	0.091	1.2	(1.004-1.434)	0.046
chr2:28289040:D	2p23.2	28289040	AT	A	0.248	0.939	0.047	0.024	1.048	(1-1.099)	0.050
rs191303287	2p23.2	28295702	A	G	0.011	0.962	0.195	0.101	1.215	(0.997-1.481)	0.052
chr2:28346336:I	2p23.2	28346336	C	CT	0.292	0.976	0.043	0.022	1.044	(1-1.09)	0.056
rs62140444	2p23.2	28346339	G	A	0.292	0.976	0.043	0.022	1.044	(1-1.09)	0.056
chr2:28346339:I	2p23.2	28346339	G	GTA	0.292	0.976	0.043	0.022	1.044	(1-1.09)	0.056
chr2:28346338:D	2p23.2	28346338	TG	T	0.292	0.976	0.043	0.022	1.044	(1-1.09)	0.056
rs10209559	2p23.2	28322460	G	A	0.355	1	-0.04	0.021	0.961	(0.922-1.001)	0.058
rs182389227	2p23.2	28348279	G	T	0.006	0.742	-0.291	0.153	0.748	(0.554-1.009)	0.058
rs112041118	2p23.2	28362183	C	T	0.298	0.983	0.041	0.022	1.042	(0.998-1.088)	0.062
chr2:28324709:D	2p23.2	28324709	TC	T	0.354	0.999	-0.039	0.021	0.962	(0.923-1.002)	0.066
rs111882076	2p23.2	28335230	C	A	0.47	0.975	0.037	0.02	1.038	(0.998-1.079)	0.068
rs6757405	2p23.2	28318916	C	T	0.354	1	-0.038	0.021	0.963	(0.924-1.003)	0.071
rs11679638	2p23.2	28319739	C	T	0.354	1	-0.038	0.021	0.963	(0.924-1.003)	0.071
rs3863	2p23.2	28319134	A	G	0.354	1	-0.038	0.021	0.963	(0.924-1.003)	0.072
rs13415164	2p23.2	28305663	C	T	0.354	0.987	-0.038	0.021	0.963	(0.924-1.003)	0.072
rs10186196	2p23.2	28327830	C	G	0.346	0.976	-0.038	0.021	0.963	(0.924-1.003)	0.072
rs188693422	2p23.2	28313200	C	G	0.018	0.958	0.141	0.079	1.151	(0.986-1.344)	0.073
rs11682011	2p23.2	28304061	G	A	0.355	0.982	-0.038	0.021	0.963	(0.924-1.003)	0.074
rs143127860	2p23.2	28335060	C	T	0.367	0.817	-0.041	0.023	0.96	(0.918-1.004)	0.076
rs6758814	2p23.2	28344863	T	C	0.471	0.981	0.036	0.02	1.037	(0.997-1.078)	0.078
rs10177837	2p23.2	28345264	T	A	0.471	0.982	0.036	0.02	1.037	(0.997-1.078)	0.081
chr2:28304979:D	2p23.2	28304979	GA	G	0.349	0.975	-0.037	0.021	0.964	(0.925-1.004)	0.084
rs13409819	2p23.2	28293299	C	A	0.56	1	-0.034	0.02	0.967	(0.929-1.005)	0.089
rs113915516	2p23.2	28353369	G	T	0.024	0.626	-0.138	0.082	0.871	(0.742-1.023)	0.091
rs186477494	2p23.2	28363664	A	G	0.027	0.582	-0.136	0.081	0.873	(0.745-1.023)	0.094
rs190984109	2p23.2	28269969	A	C	0.006	0.466	0.321	0.193	1.379	(0.944-2.012)	0.096
rs62140451	2p23.2	28354172	T	A	0.291	0.678	-0.045	0.027	0.956	(0.907-1.008)	0.097
rs74483161	2p23.2	28330501	C	A	0.017	0.836	0.14	0.085	1.15	(0.974-1.359)	0.098
rs62142462	2p23.2	28363342	C	T	0.308	0.995	0.036	0.022	1.037	(0.993-1.082)	0.100
rs7583926	2p23.2	28362111	C	T	0.308	0.995	0.036	0.022	1.037	(0.993-1.082)	0.100
rs62142461	2p23.2	28361125	T	C	0.308	0.995	0.036	0.022	1.037	(0.993-1.082)	0.102
rs62142460	2p23.2	28360104	T	A	0.308	0.995	0.036	0.022	1.037	(0.993-1.082)	0.103
rs148198687	2p23.2	28311942	C	T	0.008	0.703	-0.23	0.142	0.795	(0.602-1.05)	0.105
chr2:28364927:I	2p23.2	28364927	C	CTGT	0.308	0.993	0.035	0.022	1.036	(0.992-1.081)	0.106
rs62142463	2p23.2	28363524	A	G	0.308	0.995	0.035	0.022	1.036	(0.992-1.081)	0.110
rs6721349	2p23.2	28364426	C	T	0.308	0.995	0.035	0.022	1.036	(0.992-1.081)	0.110
rs2337699	2p23.2	28303713	C	T	0.549	0.961	-0.033	0.021	0.968	(0.929-1.008)	0.114
rs10170879	2p23.2	28363597	A	T	0.676	0.97	0.034	0.022	1.035	(0.991-1.08)	0.114
rs147390783	2p23.2	28289854	G	A	0.019	0.702	-0.138	0.087	0.871	(0.735-1.033)	0.115
rs144180216	2p23.2	28341114	T	G	0.038	0.551	-0.111	0.071	0.895	(0.779-1.029)	0.115
rs188777369	2p23.2	28325089	T	C	0.01	0.758	-0.173	0.112	0.841	(0.675-1.048)	0.122
rs148579485	2p23.2	28289041	T	A	0.265	0.851	0.038	0.025	1.039	(0.989-1.091)	0.128
rs62140450	2p23.2	28351131	A	G	0.314	0.98	0.032	0.022	1.033	(0.989-1.078)	0.150
rs10173528	2p23.2	28288392	C	T	0.58	1	0.029	0.02	1.029	(0.99-1.071)	0.152
rs9653590	2p23.2	28312838	A	G	0.232	0.946	-0.035	0.024	0.966	(0.921-1.012)	0.154
rs182957784	2p23.2	28285947	C	A	0.006	0.715	-0.219	0.156	0.803	(0.592-1.091)	0.158
rs74883596	2p23.2	28313646	C	T	0.075	0.825	0.059	0.042	1.061	(0.977-1.152)	0.159
rs144229647	2p23.2	28335336	G	A	0.053	0.979	0.064	0.045	1.066	(0.976-1.164)	0.159
rs144685018	2p23.2	28328027	C	T	0.052	0.984	0.063	0.046	1.065	(0.973-1.166)	0.171
rs115908355	2p23.2	28336258	C	T	0.054	0.979	0.062	0.045	1.064	(0.974-1.162)	0.174
rs144246507	2p23.2	28297334	A	T	0.017	0.883	0.113	0.084	1.12	(0.95-1.32)	0.178
rs10165870	2p23.2	28336738	T	C	0.054	0.979	0.061	0.045	1.063	(0.973-1.161)	0.179
rs12994832	2p23.2	28335064	C	T	0.335	0.758	-0.033	0.024	0.968	(0.923-1.014)	0.180
rs13428826	2p23.2	28344999	C	G	0.173	0.924	-0.037	0.027	0.964	(0.914-1.016)	0.182
rs56193827	2p23.2	28337479	C	T	0.054	0.979	0.059	0.045	1.061	(0.971-1.159)	0.189
rs10211646	2p23.2	28340642	C	T	0.054	0.981	0.059	0.045	1.061	(0.971-1.159)	0.193
rs6706419	2p23.2	28310608	T	C	0.948	0.988	-0.059	0.046	0.943	(0.861-1.032)	0.198
rs116559724	2p23.2	28312870	C	T	0.018	0.663	0.12	0.094	1.127	(0.938-1.356)	0.204
rs181600659	2p23.2	28335052	C	T	0.369	0.766	-0.03	0.024	0.97	(0.926-1.017)	0.206
rs11689563	2p23.2	28357708	A	G	0.272	0.991	-0.029	0.023	0.971	(0.929-1.016)	0.207
rs6547823	2p23.2	28285120	G	A	0.984	0.481	0.143	0.114	1.154	(0.923-1.443)	0.212
rs12329108	2p23.2	28367532	C	T	0.054	0.998	0.055	0.045	1.057	(0.967-1.154)	0.217
rs56016345	2p23.2	28342656	C	G	0.052	0.98	0.057	0.046	1.059	(0.967-1.159)	0.218
rs72814457	2p23.2	28343450	G	A	0.052	0.98	0.057	0.046	1.059	(0.967-1.159)	0.218
rs72814469	2p23.2	28359149	C	T	0.054	0.994	0.055	0.045	1.057	(0.967-1.154)	0.220
rs76071681	2p23.2	28362262	C	T	0.054	0.996	0.055	0.045	1.057	(0.967-1.154)	0.220
rs72814477	2p23.2	28362739	G	T	0.054	0.996	0.055	0.045	1.057	(0.967-1.154)	0.221
rs184478768	2p23.2	28354194	C	T	0.043	0.843	0.067	0.055	1.069	(0.96-1.191)	0.222
rs56133729	2p23.2	28300219	G	T	0.052	0.969	0.056	0.046	1.058	(0.966-1.157)	0.226
rs72814436	2p23.2	28303554	G	T	0.026	0.826	-0.083	0.069	0.92	(0.804-1.054)	0.229
rs151093672	2p23.2	28346326	A	G	0.017	0.822	-0.102	0.087	0.903	(0.761-1.071)	0.240
rs7559383	2p23.2	28350743	C	T	0.25	0.958	-0.028	0.024	0.972	(0.928-1.019)	0.243
chr2:28284153:D	2p23.2	28284153	TA	T	0.016	0.486	-0.133	0.114	0.875	(0.7-1.095)	0.244
rs11691530	2p23.2	28362318	C	G	0.267	1	-0.026	0.023	0.974	(0.931-1.019)	0.253
rs139899807	2p23.2	28335784	T	C	0.01	0.62	-0.145	0.13	0.865	(0.67-1.116)	0.264
rs72814459	2p23.2	28345600	G	A	0.05	0.97	0.052	0.047	1.053	(0.961-1.155)	0.265
rs4666038	2p23.2	28362187	T	C	0.024	0.701	-0.088	0.08	0.916	(0.783-1.071)	0.270
rs56066346	2p23.2	28335467	G	T	0.071	0.983	0.044	0.04	1.045	(0.966-1.13)	0.272
rs191338990	2p23.2	28354141	G	A	0.19	0.658	-0.035	0.032	0.966	(0.907-1.028)	0.273
rs6723040	2p23.2	28299659	C	T	0.054	0.961	0.05	0.046	1.051	(0.961-1.15)	0.276
rs4619558	2p23.2	28341476	C	T	0.071	0.984	0.043	0.04	1.044	(0.965-1.129)	0.278
rs59019758	2p23.2	28336801	T	C	0.071	0.983	0.043	0.04	1.044	(0.965-1.129)	0.281
rs187712634	2p23.2	28354139	G	A	0.217	0.687	-0.032	0.029	0.969	(0.915-1.025)	0.283
rs72814426	2p23.2	28298922	C	G	0.054	0.952	0.049	0.046	1.05	(0.96-1.149)	0.283
chr2:28272428:D	2p23.2	28272428	TCTA	T	0.062	0.897	0.047	0.044	1.048	(0.962-1.143)	0.288
rs13393848	2p23.2	28362014	G	A	0.265	0.999	-0.024	0.023	0.976	(0.933-1.021)	0.288
rs13384961	2p23.2	28361994	T	C	0.265	0.999	-0.024	0.023	0.976	(0.933-1.021)	0.288
rs7606772	2p23.2	28361938	G	A	0.265	0.999	-0.024	0.023	0.976	(0.933-1.021)	0.289
rs13392624	2p23.2	28343280	C	T	0.071	0.985	0.042	0.04	1.043	(0.964-1.128)	0.292
rs7594162	2p23.2	28361461	A	G	0.265	0.999	-0.024	0.023	0.976	(0.933-1.021)	0.292
rs13396701	2p23.2	28345466	T	G	0.071	0.986	0.041	0.04	1.042	(0.963-1.127)	0.296
chr2:28345717:D	2p23.2	28345717	AT	A	0.071	0.986	0.041	0.04	1.042	(0.963-1.127)	0.297
rs28513729	2p23.2	28346194	G	A	0.071	0.986	0.041	0.04	1.042	(0.963-1.127)	0.297
rs56092851	2p23.2	28300385	T	C	0.059	0.967	0.045	0.044	1.046	(0.96-1.14)	0.297
rs7575930	2p23.2	28365664	C	T	0.266	0.998	-0.024	0.023	0.976	(0.933-1.021)	0.301
rs13431389	2p23.2	28360228	T	C	0.265	0.999	-0.024	0.023	0.976	(0.933-1.021)	0.302
rs146705837	2p23.2	28287077	G	A	0.014	0.834	-0.1	0.097	0.905	(0.748-1.094)	0.304
rs7579101	2p23.2	28357327	A	G	0.265	0.999	-0.023	0.023	0.977	(0.934-1.022)	0.307
rs17006576	2p23.2	28365914	G	A	0.266	0.998	-0.023	0.023	0.977	(0.934-1.022)	0.307
rs7581912	2p23.2	28357270	T	G	0.265	0.999	-0.023	0.023	0.977	(0.934-1.022)	0.307
rs10189434	2p23.2	28358751	C	T	0.265	0.999	-0.023	0.023	0.977	(0.934-1.022)	0.307
rs2048047	2p23.2	28358981	C	T	0.265	0.999	-0.023	0.023	0.977	(0.934-1.022)	0.309
rs6712135	2p23.2	28351881	C	T	0.265	0.992	-0.023	0.023	0.977	(0.934-1.022)	0.310
rs7559376	2p23.2	28368275	G	A	0.266	0.998	-0.023	0.023	0.977	(0.934-1.022)	0.313
rs192245896	2p23.2	28350767	G	A	0.006	0.636	-0.175	0.176	0.839	(0.595-1.185)	0.320
rs2048046	2p23.2	28300758	A	T	0.061	0.969	0.043	0.043	1.044	(0.96-1.136)	0.320
rs74873433	2p23.2	28277414	T	C	0.073	0.894	-0.04	0.041	0.961	(0.887-1.041)	0.321
rs13408854	2p23.2	28358655	C	G	0.071	0.998	0.039	0.039	1.04	(0.963-1.122)	0.324
rs75890165	2p23.2	28329938	G	A	0.067	0.968	-0.04	0.04	0.961	(0.888-1.039)	0.325
rs55714239	2p23.2	28299641	A	G	0.059	0.958	0.043	0.044	1.044	(0.958-1.138)	0.328
rs186237031	2p23.2	28276215	G	A	0.009	0.697	-0.129	0.132	0.879	(0.679-1.139)	0.328
chr2:28334519:D	2p23.2	28334519	CT	C	0.067	0.971	-0.039	0.04	0.962	(0.889-1.04)	0.330
rs6707054	2p23.2	28350220	C	T	0.253	0.965	-0.023	0.024	0.977	(0.932-1.024)	0.332
rs56115343	2p23.2	28348484	T	C	0.266	0.984	-0.022	0.023	0.978	(0.935-1.023)	0.339
rs60112997	2p23.2	28338264	C	T	0.091	0.983	0.034	0.035	1.035	(0.966-1.108)	0.342
rs7585476	2p23.2	28350922	G	A	0.25	0.948	-0.023	0.024	0.977	(0.932-1.024)	0.343
rs115909175	2p23.2	28343034	G	A	0.016	0.863	-0.082	0.087	0.921	(0.777-1.093)	0.348
rs57332301	2p23.2	28336921	A	C	0.078	0.978	0.036	0.038	1.037	(0.962-1.117)	0.350
rs192999961	2p23.2	28354097	C	A	0.161	0.702	-0.03	0.033	0.97	(0.91-1.035)	0.353
rs72854468	2p23.2	28330071	A	G	0.068	0.962	-0.037	0.04	0.964	(0.891-1.042)	0.359
rs10189562	2p23.2	28278922	T	C	0.989	0.766	-0.1	0.11	0.905	(0.729-1.123)	0.366
rs143590480	2p23.2	28348750	A	G	0.007	0.721	-0.128	0.142	0.88	(0.666-1.162)	0.367
rs55666656	2p23.2	28289809	G	A	0.053	0.992	-0.04	0.045	0.961	(0.88-1.049)	0.370
rs6547829	2p23.2	28323869	C	T	0.09	1	-0.031	0.035	0.969	(0.905-1.038)	0.374
rs2063017	2p23.2	28315094	G	A	0.911	0.996	-0.032	0.036	0.969	(0.903-1.039)	0.375
rs72814479	2p23.2	28364352	A	G	0.089	0.992	0.031	0.036	1.031	(0.961-1.107)	0.376
rs10495762	2p23.2	28340848	A	G	0.104	0.979	-0.029	0.033	0.971	(0.911-1.036)	0.384
rs35456421	2p23.2	28288020	C	T	0.091	0.933	0.031	0.036	1.031	(0.961-1.107)	0.387
rs60553414	2p23.2	28342536	C	T	0.104	0.979	-0.029	0.033	0.971	(0.911-1.036)	0.387
rs140953658	2p23.2	28354368	G	A	0.007	0.66	0.132	0.153	1.141	(0.845-1.54)	0.388
rs79540894	2p23.2	28336244	G	A	0.104	0.976	-0.029	0.033	0.971	(0.911-1.036)	0.388
rs10207666	2p23.2	28344942	C	G	0.075	0.968	0.034	0.039	1.035	(0.958-1.117)	0.389
rs1948922	2p23.2	28342153	A	G	0.267	0.96	-0.02	0.023	0.98	(0.937-1.025)	0.393
chr2:28299353:D	2p23.2	28299353	TTAG	T	0.029	0.878	0.055	0.064	1.057	(0.932-1.198)	0.394
rs187457327	2p23.2	28343880	C	T	0.006	0.661	0.131	0.154	1.14	(0.843-1.542)	0.397
rs12619936	2p23.2	28348360	G	A	0.067	0.961	-0.034	0.041	0.967	(0.892-1.047)	0.398
rs72814403	2p23.2	28284652	T	A	0.05	0.918	-0.04	0.048	0.961	(0.875-1.056)	0.401
rs57911164	2p23.2	28356395	A	G	0.068	0.988	-0.034	0.04	0.967	(0.894-1.045)	0.402
rs57582121	2p23.2	28321056	A	G	0.092	0.998	-0.029	0.035	0.971	(0.907-1.04)	0.406
chr2:28351738:D	2p23.2	28351738	AAGGT	A	0.068	0.987	-0.033	0.04	0.968	(0.895-1.046)	0.415
rs6547831	2p23.2	28355240	C	T	0.068	0.988	-0.033	0.04	0.968	(0.895-1.046)	0.416
rs7578052	2p23.2	28318879	G	A	0.252	1	-0.019	0.023	0.981	(0.938-1.026)	0.418
rs13030032	2p23.2	28348170	A	T	0.245	0.965	-0.019	0.024	0.981	(0.936-1.028)	0.421
rs72814435	2p23.2	28302189	A	G	0.089	0.978	0.029	0.036	1.029	(0.959-1.105)	0.423
rs12623911	2p23.2	28323007	G	A	0.054	0.999	-0.036	0.045	0.965	(0.883-1.054)	0.424
rs12611701	2p23.2	28323220	G	A	0.054	0.999	-0.036	0.045	0.965	(0.883-1.054)	0.424
rs6547830	2p23.2	28350247	A	G	0.744	0.969	0.019	0.023	1.019	(0.974-1.066)	0.428
chr2:28290909:I	2p23.2	28290909	C	CT	0.083	0.811	-0.032	0.04	0.969	(0.895-1.047)	0.431
rs12053063	2p23.2	28350611	A	G	0.744	0.972	0.018	0.023	1.018	(0.973-1.065)	0.431
rs2879030	2p23.2	28350127	A	G	0.744	0.969	0.018	0.023	1.018	(0.973-1.065)	0.433
rs7579087	2p23.2	28327216	A	C	0.091	0.993	-0.028	0.035	0.972	(0.908-1.041)	0.433
rs115641909	2p23.2	28329898	T	A	0.087	0.823	0.031	0.039	1.031	(0.956-1.113)	0.434
rs72814425	2p23.2	28294099	A	G	0.044	0.956	-0.039	0.05	0.962	(0.872-1.061)	0.435
rs7577389	2p23.2	28322037	A	T	0.054	0.996	-0.035	0.044	0.966	(0.886-1.053)	0.435
rs72814415	2p23.2	28290527	C	G	0.043	0.988	-0.039	0.05	0.962	(0.872-1.061)	0.437
rs4666036	2p23.2	28350968	C	T	0.252	0.995	-0.018	0.023	0.982	(0.939-1.027)	0.438
rs60129738	2p23.2	28328311	G	A	0.054	0.989	-0.034	0.045	0.967	(0.885-1.056)	0.442
rs56078812	2p23.2	28293006	G	A	0.044	0.969	-0.038	0.05	0.963	(0.873-1.062)	0.442
rs6751559	2p23.2	28367761	T	G	0.104	0.989	-0.025	0.033	0.975	(0.914-1.04)	0.444
rs12471457	2p23.2	28354745	A	G	0.251	0.997	-0.018	0.023	0.982	(0.939-1.027)	0.445
rs11895148	2p23.2	28323313	C	T	0.056	0.999	-0.033	0.044	0.968	(0.888-1.055)	0.445
rs116765897	2p23.2	28312773	G	A	0.091	0.994	-0.027	0.035	0.973	(0.909-1.042)	0.446
chr2:28293422:D	2p23.2	28293422	TC	T	0.027	0.851	-0.052	0.068	0.949	(0.831-1.085)	0.450
rs72814431	2p23.2	28301969	A	T	0.089	0.978	0.027	0.036	1.027	(0.957-1.102)	0.450
rs12614347	2p23.2	28362019	G	T	0.105	0.988	-0.025	0.033	0.975	(0.914-1.04)	0.457
rs13000292	2p23.2	28335353	C	T	0.25	0.962	-0.018	0.024	0.982	(0.937-1.029)	0.459
rs7573920	2p23.2	28317641	G	A	0.054	0.996	-0.033	0.045	0.968	(0.886-1.057)	0.460
rs184650156	2p23.2	28288366	G	A	0.01	0.853	-0.08	0.109	0.923	(0.746-1.143)	0.462
rs141891439	2p23.2	28338269	G	A	0.038	0.924	-0.04	0.055	0.961	(0.863-1.07)	0.467
rs11127133	2p23.2	28358479	T	C	0.75	1	0.017	0.023	1.017	(0.972-1.064)	0.468
rs72814407	2p23.2	28286685	T	C	0.044	0.988	-0.036	0.049	0.965	(0.876-1.062)	0.468
rs11889865	2p23.2	28345789	T	G	0.101	0.966	-0.025	0.034	0.975	(0.912-1.043)	0.469
rs79959722	2p23.2	28317086	A	G	0.054	0.992	-0.032	0.045	0.969	(0.887-1.058)	0.469
rs6547827	2p23.2	28314922	C	T	0.054	0.996	-0.032	0.044	0.969	(0.888-1.056)	0.470
rs183143248	2p23.2	28335923	A	T	0.11	0.975	0.024	0.033	1.024	(0.96-1.093)	0.470
rs7588781	2p23.2	28291394	G	A	0.044	0.985	-0.035	0.049	0.966	(0.877-1.063)	0.475
rs111786627	2p23.2	28338863	A	T	0.1	0.963	-0.024	0.034	0.976	(0.913-1.044)	0.477
rs55692007	2p23.2	28290091	G	A	0.044	0.989	-0.035	0.049	0.966	(0.877-1.063)	0.477
rs6750298	2p23.2	28299352	G	T	0.048	0.749	0.039	0.055	1.04	(0.934-1.158)	0.478
rs78938732	2p23.2	28332948	G	A	0.051	0.891	0.034	0.048	1.035	(0.942-1.137)	0.479
chr2:28316663:D	2p23.2	28316663	CAGTT	C	0.054	0.995	-0.031	0.044	0.969	(0.889-1.057)	0.479
rs12464240	2p23.2	28361831	T	C	0.251	0.999	-0.016	0.023	0.984	(0.941-1.03)	0.479
rs72812599	2p23.2	28279081	G	C	0.044	0.985	-0.035	0.049	0.966	(0.877-1.063)	0.480
rs149482342	2p23.2	28360658	A	G	0.007	0.737	-0.099	0.14	0.906	(0.688-1.192)	0.480
rs12467834	2p23.2	28362068	G	A	0.251	0.999	-0.016	0.023	0.984	(0.941-1.03)	0.481
rs75122483	2p23.2	28272195	G	A	0.009	0.761	0.09	0.127	1.094	(0.853-1.403)	0.481
rs55686000	2p23.2	28275397	T	C	0.044	0.988	-0.035	0.049	0.966	(0.877-1.063)	0.482
rs72812598	2p23.2	28278882	C	T	0.044	0.988	-0.035	0.049	0.966	(0.877-1.063)	0.482
rs7562828	2p23.2	28277579	A	G	0.044	0.988	-0.035	0.049	0.966	(0.877-1.063)	0.483
rs146588413	2p23.2	28305957	G	C	0.013	0.808	0.071	0.101	1.074	(0.881-1.309)	0.483
rs72814433	2p23.2	28302033	G	A	0.091	0.977	0.025	0.036	1.025	(0.955-1.1)	0.483
rs10204081	2p23.2	28358774	T	C	0.748	0.999	0.016	0.023	1.016	(0.971-1.063)	0.484
rs114249839	2p23.2	28350310	A	G	0.014	0.78	-0.067	0.096	0.935	(0.775-1.129)	0.485
rs72814437	2p23.2	28303756	C	G	0.096	0.98	0.024	0.035	1.024	(0.956-1.097)	0.485
rs181641459	2p23.2	28293423	C	T	0.041	0.725	-0.042	0.06	0.959	(0.852-1.079)	0.485
rs115519145	2p23.2	28313004	C	G	0.015	0.858	-0.063	0.09	0.939	(0.787-1.12)	0.485
rs192838600	2p23.2	28277371	G	T	0.006	0.581	-0.123	0.176	0.884	(0.626-1.249)	0.486
rs13408504	2p23.2	28358334	C	T	0.748	0.999	0.016	0.023	1.016	(0.971-1.063)	0.486
rs13023955	2p23.2	28364272	T	C	0.251	0.999	-0.016	0.023	0.984	(0.941-1.03)	0.487
rs1395324	2p23.2	28276643	C	G	0.775	0.996	0.017	0.024	1.017	(0.97-1.066)	0.487
rs72812594	2p23.2	28270024	G	A	0.044	0.982	-0.034	0.049	0.967	(0.878-1.064)	0.490
rs144118728	2p23.2	28329642	C	T	0.011	0.939	-0.068	0.1	0.934	(0.768-1.137)	0.495
rs34784711	2p23.2	28362552	G	A	0.103	0.99	-0.023	0.033	0.977	(0.916-1.043)	0.497
rs116332958	2p23.2	28316756	A	C	0.006	0.896	0.093	0.137	1.097	(0.839-1.436)	0.497
rs12618676	2p23.2	28364283	C	T	0.748	0.998	0.016	0.023	1.016	(0.971-1.063)	0.499
rs2220508	2p23.2	28368509	T	C	0.748	0.996	0.016	0.023	1.016	(0.971-1.063)	0.502
rs7608642	2p23.2	28367249	G	A	0.748	0.996	0.016	0.023	1.016	(0.971-1.063)	0.504
rs137861763	2p23.2	28317733	C	T	0.006	0.451	-0.127	0.191	0.881	(0.606-1.281)	0.506
chr2:28333076:D	2p23.2	28333076	TG	T	0.107	0.984	0.022	0.033	1.022	(0.958-1.091)	0.507
rs55819434	2p23.2	28333109	A	G	0.107	0.984	0.022	0.033	1.022	(0.958-1.091)	0.507
rs148809417	2p23.2	28304861	A	G	0.016	0.595	0.069	0.105	1.071	(0.872-1.316)	0.509
chr2:28333069:D	2p23.2	28333069	CT	C	0.107	0.984	0.022	0.033	1.022	(0.958-1.091)	0.510
rs74576866	2p23.2	28329401	A	G	0.093	0.967	0.023	0.035	1.023	(0.955-1.096)	0.512
rs55646588	2p23.2	28271131	T	C	0.044	0.989	-0.032	0.049	0.969	(0.88-1.066)	0.515
rs72812593	2p23.2	28269715	C	A	0.044	0.989	-0.032	0.049	0.969	(0.88-1.066)	0.515
rs76511894	2p23.2	28270326	T	A	0.044	0.989	-0.032	0.049	0.969	(0.88-1.066)	0.515
rs7567655	2p23.2	28273595	A	G	0.044	0.988	-0.032	0.049	0.969	(0.88-1.066)	0.515
rs72812595	2p23.2	28270888	T	C	0.044	0.988	-0.032	0.049	0.969	(0.88-1.066)	0.515
rs13431542	2p23.2	28315145	C	T	0.618	0.96	0.014	0.021	1.014	(0.973-1.057)	0.519
rs184779873	2p23.2	28354103	T	C	0.191	0.688	-0.019	0.031	0.981	(0.923-1.043)	0.529
rs114901223	2p23.2	28275534	C	T	0.037	0.717	-0.04	0.063	0.961	(0.849-1.087)	0.530
rs148965919	2p23.2	28272728	G	A	0.01	0.91	-0.067	0.107	0.935	(0.758-1.153)	0.531
rs116704954	2p23.2	28297854	G	C	0.006	0.893	0.089	0.142	1.093	(0.828-1.444)	0.534
rs140538704	2p23.2	28344361	A	G	0.007	0.733	-0.087	0.14	0.917	(0.697-1.206)	0.536
rs115738988	2p23.2	28278438	T	C	0.01	0.932	-0.065	0.107	0.937	(0.76-1.156)	0.540
rs144825393	2p23.2	28280720	A	G	0.01	0.933	-0.065	0.107	0.937	(0.76-1.156)	0.541
rs139839351	2p23.2	28281889	G	C	0.01	0.933	-0.065	0.107	0.937	(0.76-1.156)	0.541
rs138538087	2p23.2	28283680	T	C	0.01	0.934	-0.065	0.107	0.937	(0.76-1.156)	0.541
rs138507727	2p23.2	28280397	T	C	0.01	0.933	-0.065	0.107	0.937	(0.76-1.156)	0.541
rs141495247	2p23.2	28284055	G	A	0.01	0.934	-0.065	0.107	0.937	(0.76-1.156)	0.541
rs189263989	2p23.2	28275300	A	G	0.01	0.91	-0.065	0.107	0.937	(0.76-1.156)	0.541
rs147979693	2p23.2	28287644	G	A	0.01	0.936	-0.065	0.107	0.937	(0.76-1.156)	0.542
rs114270037	2p23.2	28289347	C	T	0.01	0.938	-0.065	0.107	0.937	(0.76-1.156)	0.544
rs187371589	2p23.2	28333477	C	T	0.007	0.449	0.109	0.181	1.115	(0.782-1.59)	0.546
rs6547820	2p23.2	28281545	G	A	0.786	0.993	0.015	0.024	1.015	(0.968-1.064)	0.547
rs6705861	2p23.2	28355224	C	G	0.569	0.984	0.012	0.02	1.012	(0.973-1.053)	0.547
rs142714268	2p23.2	28290650	G	A	0.01	0.938	-0.064	0.107	0.938	(0.761-1.157)	0.550
rs11692928	2p23.2	28356386	G	T	0.573	0.995	0.012	0.02	1.012	(0.973-1.053)	0.552
rs144676326	2p23.2	28281758	G	T	0.008	0.783	-0.076	0.127	0.927	(0.723-1.189)	0.552
rs13402420	2p23.2	28271435	T	G	0.776	0.993	0.014	0.024	1.014	(0.968-1.063)	0.552
rs145932909	2p23.2	28276868	A	G	0.008	0.782	-0.076	0.127	0.927	(0.723-1.189)	0.553
rs13405377	2p23.2	28315144	G	T	0.618	0.959	0.012	0.021	1.012	(0.971-1.055)	0.556
rs189275566	2p23.2	28288778	C	T	0.01	0.933	-0.062	0.107	0.94	(0.762-1.159)	0.558
rs6737205	2p23.2	28329313	A	C	0.055	0.971	-0.026	0.045	0.974	(0.892-1.064)	0.564
rs1506534	2p23.2	28300314	A	G	0.098	0.969	0.02	0.034	1.02	(0.954-1.091)	0.569
rs80056248	2p23.2	28363627	G	A	0.038	0.903	-0.031	0.055	0.969	(0.87-1.08)	0.575
rs139964437	2p23.2	28291884	C	T	0.01	0.934	-0.06	0.107	0.942	(0.764-1.162)	0.575
rs6720961	2p23.2	28355295	A	G	0.569	0.984	0.011	0.02	1.011	(0.972-1.051)	0.587
rs7581221	2p23.2	28362002	C	A	0.571	0.993	0.011	0.02	1.011	(0.972-1.051)	0.596
rs71441102	2p23.2	28322990	G	C	0.037	0.807	0.031	0.059	1.031	(0.919-1.158)	0.597
rs141609738	2p23.2	28299348	T	G	0.104	0.663	-0.021	0.041	0.979	(0.904-1.061)	0.606
rs17006489	2p23.2	28304630	A	G	0.115	0.982	0.016	0.032	1.016	(0.954-1.082)	0.607
rs141853309	2p23.2	28293694	T	A	0.01	0.923	-0.055	0.107	0.946	(0.767-1.167)	0.608
rs7601155	2p23.2	28347682	C	T	0.035	0.794	-0.03	0.061	0.97	(0.861-1.094)	0.623
rs4401177	2p23.2	28344285	G	A	0.117	1	0.015	0.031	1.015	(0.955-1.079)	0.623
rs73922210	2p23.2	28298447	G	A	0.018	0.914	-0.039	0.08	0.962	(0.822-1.125)	0.626
rs13016086	2p23.2	28315770	T	C	0.109	1	-0.016	0.032	0.984	(0.924-1.048)	0.629
rs143247105	2p23.2	28289004	C	T	0.012	0.52	-0.062	0.13	0.94	(0.728-1.213)	0.634
rs62140425	2p23.2	28269852	C	A	0.016	0.596	0.049	0.104	1.05	(0.857-1.288)	0.638
chr2:28326849:D	2p23.2	28326849	AT	A	0.025	0.955	-0.031	0.066	0.969	(0.852-1.103)	0.642
rs12466422	2p23.2	28339906	A	G	0.013	0.616	-0.052	0.113	0.949	(0.761-1.185)	0.648
rs142232783	2p23.2	28328498	T	C	0.024	0.974	-0.03	0.067	0.97	(0.851-1.107)	0.650
rs190770266	2p23.2	28312186	G	A	0.017	0.661	-0.043	0.095	0.958	(0.795-1.154)	0.650
rs148499690	2p23.2	28328496	G	A	0.024	0.974	-0.03	0.067	0.97	(0.851-1.107)	0.655
rs115979327	2p23.2	28328460	T	G	0.024	0.974	-0.03	0.067	0.97	(0.851-1.107)	0.655
rs143755577	2p23.2	28337741	A	G	0.01	0.536	0.061	0.138	1.063	(0.811-1.393)	0.655
rs141897057	2p23.2	28294041	C	G	0.01	0.926	-0.048	0.107	0.953	(0.773-1.176)	0.656
rs143013881	2p23.2	28313196	C	G	0.048	0.895	0.022	0.05	1.022	(0.927-1.127)	0.657
rs7572644	2p23.2	28320033	T	C	0.198	0.999	-0.011	0.025	0.989	(0.942-1.039)	0.659
rs937813	2p23.2	28301540	T	C	0.114	0.932	-0.014	0.033	0.986	(0.924-1.052)	0.660
rs7581813	2p23.2	28319961	G	T	0.198	0.998	-0.011	0.025	0.989	(0.942-1.039)	0.664
rs116733012	2p23.2	28321473	A	G	0.024	0.986	-0.029	0.066	0.971	(0.854-1.106)	0.665
rs2048048	2p23.2	28358962	G	A	0.335	1	-0.009	0.021	0.991	(0.951-1.033)	0.666
rs7600749	2p23.2	28308462	A	G	0.026	0.974	-0.027	0.064	0.973	(0.859-1.103)	0.676
rs62140453	2p23.2	28354197	C	T	0.35	0.702	-0.01	0.025	0.99	(0.943-1.04)	0.684
rs192321967	2p23.2	28287645	G	C	0.007	0.461	-0.075	0.186	0.928	(0.644-1.336)	0.685
rs190907108	2p23.2	28354586	C	T	0.006	0.617	-0.067	0.167	0.935	(0.674-1.297)	0.687
rs186389245	2p23.2	28354381	A	T	0.006	0.621	-0.066	0.167	0.936	(0.675-1.299)	0.691
rs11691385	2p23.2	28298984	A	G	0.82	0.928	0.011	0.027	1.011	(0.959-1.066)	0.696
rs2337700	2p23.2	28306943	G	A	0.191	1	-0.01	0.025	0.99	(0.943-1.04)	0.707
rs6740392	2p23.2	28299344	T	G	0.57	0.849	-0.008	0.022	0.992	(0.95-1.036)	0.709
rs56414201	2p23.2	28361560	C	T	0.037	0.92	-0.021	0.055	0.979	(0.879-1.091)	0.710
rs74175071	2p23.2	28335068	T	C	0.204	0.826	-0.01	0.027	0.99	(0.939-1.044)	0.710
rs62140452	2p23.2	28354190	C	T	0.308	0.713	-0.01	0.026	0.99	(0.941-1.042)	0.713
rs74810045	2p23.2	28305786	C	G	0.008	0.527	-0.056	0.155	0.946	(0.698-1.281)	0.719
rs1911128	2p23.2	28279649	T	G	0.826	0.985	0.009	0.027	1.009	(0.957-1.064)	0.721
rs72814468	2p23.2	28359016	T	C	0.121	0.975	0.011	0.031	1.011	(0.951-1.074)	0.729
rs12618790	2p23.2	28349706	T	C	0.963	0.738	-0.021	0.062	0.979	(0.867-1.106)	0.730
rs149357753	2p23.2	28295721	C	T	0.008	0.878	-0.042	0.124	0.959	(0.752-1.223)	0.735
rs115164411	2p23.2	28304915	T	C	0.024	0.97	-0.022	0.067	0.978	(0.858-1.116)	0.741
rs10182585	2p23.2	28317809	A	G	0.641	0.999	0.007	0.021	1.007	(0.966-1.049)	0.742
rs10187665	2p23.2	28324130	A	G	0.641	0.995	0.007	0.021	1.007	(0.966-1.049)	0.750
rs13402525	2p23.2	28314858	G	T	0.64	1	0.007	0.021	1.007	(0.966-1.049)	0.750
rs150293561	2p23.2	28284224	G	T	0.04	0.781	-0.018	0.057	0.982	(0.878-1.098)	0.752
rs73922218	2p23.2	28310094	A	T	0.019	0.982	-0.024	0.075	0.976	(0.843-1.131)	0.754
rs149412989	2p23.2	28368929	G	A	0.017	0.987	-0.025	0.08	0.975	(0.834-1.141)	0.754
chr2:28348986:I	2p23.2	28348986	G	GT	0.024	0.961	-0.021	0.067	0.979	(0.859-1.117)	0.755
rs183036452	2p23.2	28349005	T	A	0.024	0.961	-0.021	0.067	0.979	(0.859-1.117)	0.756
chr2:28281417:I	2p23.2	28281417	A	AAT	0.041	0.698	-0.019	0.061	0.981	(0.871-1.106)	0.756
rs139767979	2p23.2	28366684	T	C	0.017	0.987	-0.025	0.08	0.975	(0.834-1.141)	0.756
rs139394389	2p23.2	28328602	G	A	0.017	0.987	-0.024	0.078	0.976	(0.838-1.138)	0.757
chr2:28312186:I	2p23.2	28312186	G	GA	0.037	0.993	-0.016	0.054	0.984	(0.885-1.094)	0.759
rs62140459	2p23.2	28357551	G	A	0.121	0.977	0.009	0.031	1.009	(0.95-1.072)	0.760
rs186927233	2p23.2	28327783	C	A	0.017	0.988	-0.024	0.078	0.976	(0.838-1.138)	0.761
rs6547822	2p23.2	28284941	G	A	0.985	0.47	0.037	0.121	1.038	(0.819-1.315)	0.761
chr2:28305859:D	2p23.2	28305859	GTCTTA	G	0.056	0.78	-0.015	0.05	0.985	(0.893-1.087)	0.761
rs10173426	2p23.2	28309577	A	G	0.641	0.993	0.006	0.021	1.006	(0.965-1.048)	0.766
chr2:28354995:D	2p23.2	28354995	TC	T	0.035	0.831	-0.017	0.06	0.983	(0.874-1.106)	0.771
rs62140449	2p23.2	28350375	C	T	0.123	0.98	0.009	0.031	1.009	(0.95-1.072)	0.772
rs6710214	2p23.2	28317441	A	G	0.641	0.999	0.006	0.021	1.006	(0.965-1.048)	0.774
rs188046095	2p23.2	28287323	C	T	0.008	0.842	-0.035	0.124	0.966	(0.757-1.231)	0.779
rs148342447	2p23.2	28365091	G	A	0.017	0.987	-0.022	0.079	0.978	(0.838-1.142)	0.785
rs17006512	2p23.2	28320853	T	C	0.017	0.998	-0.021	0.078	0.979	(0.84-1.141)	0.786
rs115747209	2p23.2	28320676	G	A	0.017	0.998	-0.021	0.078	0.979	(0.84-1.141)	0.786
rs143078593	2p23.2	28318058	G	A	0.017	0.994	-0.021	0.078	0.979	(0.84-1.141)	0.792
rs11678963	2p23.2	28315558	A	G	0.641	0.999	0.005	0.021	1.005	(0.964-1.047)	0.794
rs6758799	2p23.2	28284633	T	C	0.828	0.993	0.007	0.027	1.007	(0.955-1.062)	0.796
chr2:28315727:D	2p23.2	28315727	AG	A	0.017	0.993	-0.02	0.078	0.98	(0.841-1.142)	0.797
chr2:28312443:I	2p23.2	28312443	G	GA	0.015	0.537	0.029	0.114	1.029	(0.823-1.287)	0.797
rs187372867	2p23.2	28349042	G	A	0.008	0.496	-0.043	0.169	0.958	(0.688-1.334)	0.798
rs4665402	2p23.2	28296630	A	T	0.236	1	0.006	0.024	1.006	(0.96-1.054)	0.800
rs145776218	2p23.2	28313633	C	T	0.017	0.99	-0.019	0.078	0.981	(0.842-1.143)	0.807
rs112301260	2p23.2	28355266	A	G	0.008	0.627	0.034	0.139	1.035	(0.788-1.359)	0.810
rs141170212	2p23.2	28312832	A	C	0.017	0.988	-0.019	0.079	0.981	(0.84-1.145)	0.812
rs187930790	2p23.2	28354079	G	C	0.221	0.645	-0.007	0.03	0.993	(0.936-1.053)	0.813
rs76410083	2p23.2	28356671	A	G	0.016	0.574	0.025	0.107	1.025	(0.831-1.265)	0.818
rs139839516	2p23.2	28361978	G	T	0.017	0.988	-0.018	0.079	0.982	(0.841-1.147)	0.820
rs141362234	2p23.2	28360083	G	A	0.017	0.988	-0.018	0.079	0.982	(0.841-1.147)	0.822
rs138064765	2p23.2	28311007	T	C	0.017	0.985	-0.018	0.079	0.982	(0.841-1.147)	0.824
rs144381401	2p23.2	28357870	G	A	0.017	0.987	-0.017	0.079	0.983	(0.842-1.148)	0.825
rs141428078	2p23.2	28310661	G	A	0.017	0.984	-0.017	0.079	0.983	(0.842-1.148)	0.827
rs1911127	2p23.2	28279693	G	A	0.828	0.993	0.006	0.027	1.006	(0.954-1.061)	0.828
chr2:28351772:D	2p23.2	28351772	TG	T	0.017	0.984	-0.017	0.079	0.983	(0.842-1.148)	0.829
rs144626895	2p23.2	28280396	A	C	0.01	0.647	-0.027	0.128	0.973	(0.757-1.251)	0.831
rs140431635	2p23.2	28309729	T	C	0.017	0.983	-0.017	0.079	0.983	(0.842-1.148)	0.833
rs9309659	2p23.2	28326258	G	C	0.732	0.991	-0.004	0.023	0.996	(0.952-1.042)	0.844
rs184624049	2p23.2	28314913	A	G	0.008	0.556	-0.03	0.155	0.97	(0.716-1.315)	0.848
rs140254403	2p23.2	28363741	G	A	0.015	0.957	-0.016	0.086	0.984	(0.831-1.165)	0.850
chr2:28344589:D	2p23.2	28344589	TA	T	0.018	0.971	-0.014	0.079	0.986	(0.845-1.151)	0.860
rs13414801	2p23.2	28290347	T	C	0.656	1	-0.004	0.021	0.996	(0.956-1.038)	0.864
rs6737313	2p23.2	28299267	A	G	0.745	0.942	-0.004	0.024	0.996	(0.95-1.044)	0.877
rs71443003	2p23.2	28353518	G	A	0.09	0.922	-0.006	0.037	0.994	(0.924-1.069)	0.878
rs80221201	2p23.2	28366922	C	T	0.043	0.991	-0.007	0.05	0.993	(0.9-1.095)	0.881
rs115527090	2p23.2	28273445	A	C	0.008	0.46	0.024	0.169	1.024	(0.735-1.427)	0.887
rs192790092	2p23.2	28336294	T	G	0.006	0.354	-0.027	0.221	0.973	(0.631-1.501)	0.902
rs2337698	2p23.2	28303435	T	C	0.028	0.909	-0.007	0.064	0.993	(0.876-1.126)	0.909
rs140676730	2p23.2	28321010	T	C	0.008	0.821	0.014	0.124	1.014	(0.795-1.293)	0.909
rs183025280	2p23.2	28333384	G	T	0.018	0.967	-0.009	0.079	0.991	(0.849-1.157)	0.911
rs34967399	2p23.2	28357730	T	C	0.017	0.758	0.009	0.089	1.009	(0.848-1.201)	0.919
rs79063311	2p23.2	28300969	A	G	0.036	0.867	-0.006	0.058	0.994	(0.887-1.114)	0.920
chr2:28331852:D	2p23.2	28331852	GT	G	0.018	0.968	-0.008	0.079	0.992	(0.85-1.158)	0.921
rs184601907	2p23.2	28354166	T	C	0.038	0.709	0.006	0.063	1.006	(0.889-1.138)	0.928
rs141479371	2p23.2	28365135	C	G	0.009	0.702	-0.011	0.129	0.989	(0.768-1.274)	0.932
chr2:28335014:D	2p23.2	28335014	TTACC	T	0.916	0.75	0.003	0.041	1.003	(0.926-1.087)	0.935
rs151302103	2p23.2	28305061	C	T	0.008	0.955	-0.01	0.121	0.99	(0.781-1.255)	0.936
rs6733853	2p23.2	28355167	G	A	0.497	0.883	0.002	0.021	1.002	(0.962-1.044)	0.944
rs149519839	2p23.2	28299991	C	A	0.016	0.952	-0.005	0.081	0.995	(0.849-1.166)	0.950
rs78609504	2p23.2	28295953	A	G	0.008	0.664	0.007	0.14	1.007	(0.765-1.325)	0.960
rs114607001	2p23.2	28326514	A	G	0.024	0.749	-0.004	0.075	0.996	(0.86-1.154)	0.963
rs55796876	2p23.2	28329895	A	G	0.811	0.961	-0.001	0.026	0.999	(0.949-1.051)	0.965
rs12614744	2p23.2	28269702	T	A	0.17	0.99	0.001	0.027	1.001	(0.949-1.055)	0.972
rs6740628	2p23.2	28329602	T	C	0.987	0.559	0.004	0.119	1.004	(0.795-1.268)	0.973
rs74882377	2p23.2	28305413	G	A	0.006	0.568	0.006	0.177	1.006	(0.711-1.423)	0.974
rs1969131	2p23.2	28341375	C	T	0.175	0.98	0	0.027	1	(0.948-1.054)	0.988
rs145662582	2p23.2	28298911	A	C	0.008	0.629	-0.002	0.143	0.998	(0.754-1.321)	0.988
rs12614949	2p23.2	28307791	G	A	0.695	0.993	0	0.022	1	(0.958-1.044)	0.991
rs149305973	2p23.2	28339122	T	C	0.007	0.961	0	0.123	1	(0.786-1.273)	0.999
rs139958627	2p23.2	28339035	C	T	0.007	0.961	0	0.123	1	(0.786-1.273)	0.999
		NA			NA	NA	NA	NA	NA	(NA-NA)
rs114679233	4p15.33	14822230	G	A	0.008	0.558	0.484	0.155	1.623	(1.197-2.199)	0.002
rs1389999	4p15.33	14858341	C	T	0.654	1	0.059	0.021	1.061	(1.018-1.105)	0.005
rs182385885	4p15.33	14884593	G	A	0.009	0.37	-0.433	0.173	0.649	(0.462-0.91)	0.012
rs79276692	4p15.33	14837774	T	A	0.028	0.465	-0.216	0.09	0.806	(0.675-0.961)	0.016
rs4626198	4p15.33	14819201	G	A	0.214	0.847	-0.063	0.026	0.939	(0.892-0.988)	0.016
rs55820936	4p15.33	14849314	G	A	0.379	0.982	0.049	0.021	1.05	(1.008-1.094)	0.020
rs146984135	4p15.33	14815515	T	A	0.04	0.48	-0.169	0.074	0.845	(0.73-0.976)	0.022
rs56141623	4p15.33	14830762	A	C	0.16	0.692	-0.075	0.033	0.928	(0.87-0.99)	0.022
rs4569748	4p15.33	14832006	A	G	0.752	0.659	0.065	0.029	1.067	(1.008-1.13)	0.023
rs113250947	4p15.33	14830370	A	G	0.023	0.562	-0.2	0.09	0.819	(0.686-0.977)	0.026
rs192544131	4p15.33	14838916	C	T	0.033	0.536	0.172	0.078	1.188	(1.019-1.384)	0.027
rs6841236	4p15.33	14847845	C	T	0.378	0.99	0.046	0.021	1.047	(1.005-1.091)	0.028
rs6850252	4p15.33	14827886	A	T	0.215	0.81	-0.059	0.027	0.943	(0.894-0.994)	0.030
rs55712500	4p15.33	14824267	C	G	0.221	0.822	-0.057	0.026	0.945	(0.898-0.994)	0.030
rs58827138	4p15.33	14822993	C	A	0.221	0.823	-0.057	0.026	0.945	(0.898-0.994)	0.030
rs28437955	4p15.33	14823946	A	G	0.221	0.823	-0.057	0.026	0.945	(0.898-0.994)	0.030
rs190029742	4p15.33	14839011	A	T	0.275	0.685	0.059	0.027	1.061	(1.006-1.118)	0.030
rs138065464	4p15.33	14861716	G	A	0.038	0.478	0.161	0.076	1.175	(1.012-1.363)	0.034
rs16891110	4p15.33	14863183	A	G	0.038	0.474	0.162	0.077	1.176	(1.011-1.367)	0.034
rs73130608	4p15.33	14814258	G	A	0.019	0.683	-0.186	0.088	0.83	(0.699-0.987)	0.035
rs62409426	4p15.33	14847842	G	A	0.1	0.807	-0.078	0.037	0.925	(0.86-0.995)	0.036
rs10029128	4p15.33	14852132	A	G	0.11	0.814	-0.074	0.036	0.929	(0.865-0.997)	0.036
rs3898119	4p15.33	14858392	G	C	0.095	1	0.072	0.034	1.075	(1.005-1.149)	0.038
rs28537695	4p15.33	14839151	A	C	0.499	0.894	0.044	0.021	1.045	(1.003-1.089)	0.039
rs73241357	4p15.33	14856009	C	T	0.109	0.806	-0.074	0.036	0.929	(0.865-0.997)	0.039
rs6818066	4p15.33	14848030	A	C	0.383	1	0.043	0.021	1.044	(1.002-1.088)	0.039
rs7695275	4p15.33	14840148	T	C	0.503	0.899	0.044	0.021	1.045	(1.003-1.089)	0.040
rs73224704	4p15.33	14857805	G	A	0.107	0.89	0.071	0.035	1.074	(1.002-1.15)	0.041
rs6812607	4p15.33	14851147	G	A	0.108	0.813	-0.073	0.036	0.93	(0.866-0.998)	0.042
rs28557427	4p15.33	14854347	T	C	0.108	0.817	-0.073	0.036	0.93	(0.866-0.998)	0.042
rs149235211	4p15.33	14865014	T	C	0.038	0.465	0.157	0.077	1.17	(1.006-1.361)	0.043
chr4:14858848:D	4p15.33	14858848	AG	A	0.066	0.62	-0.104	0.051	0.901	(0.815-0.996)	0.043
rs56010433	4p15.33	14851491	G	C	0.108	0.814	-0.072	0.036	0.931	(0.867-0.999)	0.043
rs7663364	4p15.33	14829645	T	A	0.213	0.794	-0.055	0.027	0.946	(0.898-0.998)	0.045
rs184683885	4p15.33	14838339	G	A	0.067	0.477	-0.116	0.058	0.89	(0.795-0.998)	0.045
rs6837175	4p15.33	14822667	A	G	0.211	0.822	-0.054	0.027	0.947	(0.899-0.999)	0.046
rs147547266	4p15.33	14865382	T	A	0.038	0.46	0.154	0.078	1.166	(1.001-1.359)	0.047
rs56111711	4p15.33	14838977	T	C	0.112	0.586	-0.084	0.042	0.919	(0.847-0.998)	0.047
rs114008651	4p15.33	14865396	A	T	0.038	0.46	0.154	0.078	1.166	(1.001-1.359)	0.047
rs148856651	4p15.33	14825337	C	T	0.021	0.549	0.192	0.097	1.212	(1.002-1.465)	0.047
rs187202663	4p15.33	14838993	A	T	0.085	0.58	0.094	0.048	1.099	(1-1.207)	0.050
rs4698295	4p15.33	14812935	C	T	0.204	0.859	-0.052	0.027	0.949	(0.9-1.001)	0.051
rs11737884	4p15.33	14853812	A	G	0.109	0.814	-0.069	0.036	0.933	(0.87-1.002)	0.055
rs68021387	4p15.33	14811692	T	C	0.21	0.854	-0.051	0.026	0.95	(0.903-1)	0.055
rs6834109	4p15.33	14831800	T	C	0.027	0.544	-0.159	0.083	0.853	(0.725-1.004)	0.056
rs114881357	4p15.33	14887700	C	T	0.006	0.56	-0.321	0.168	0.725	(0.522-1.008)	0.056
rs115168167	4p15.33	14828342	A	C	0.016	0.699	-0.184	0.097	0.832	(0.688-1.006)	0.057
rs7681191	4p15.33	14829806	C	T	0.211	0.778	-0.052	0.028	0.949	(0.899-1.003)	0.059
rs6848922	4p15.33	14864422	T	C	0.461	0.552	0.052	0.027	1.053	(0.999-1.111)	0.059
rs12512199	4p15.33	14852051	T	C	0.184	0.905	0.051	0.027	1.052	(0.998-1.11)	0.060
rs55779200	4p15.33	14865674	G	A	0.056	0.495	-0.116	0.062	0.89	(0.789-1.006)	0.062
rs78028577	4p15.33	14819401	C	T	0.016	0.729	-0.175	0.094	0.839	(0.698-1.009)	0.063
rs77337118	4p15.33	14818965	T	G	0.016	0.729	-0.174	0.094	0.84	(0.699-1.01)	0.064
rs149258022	4p15.33	14817548	G	A	0.016	0.73	-0.174	0.094	0.84	(0.699-1.01)	0.065
rs116622919	4p15.33	14822480	A	C	0.015	0.721	-0.178	0.096	0.837	(0.693-1.01)	0.065
rs11943865	4p15.33	14865093	C	T	0.041	0.461	0.137	0.074	1.147	(0.992-1.326)	0.066
rs74955421	4p15.33	14808574	G	A	0.016	0.739	-0.171	0.094	0.843	(0.701-1.013)	0.068
rs115150268	4p15.33	14824022	G	A	0.015	0.72	-0.176	0.097	0.839	(0.693-1.014)	0.068
rs142218690	4p15.33	14815064	G	A	0.016	0.735	-0.171	0.094	0.843	(0.701-1.013)	0.068
rs76276595	4p15.33	14813080	G	T	0.006	0.48	-0.343	0.19	0.71	(0.489-1.03)	0.070
rs13109624	4p15.33	14908189	A	G	0.118	0.461	-0.082	0.046	0.921	(0.842-1.008)	0.074
chr4:14859007:I	4p15.33	14859007	G	GA	0.069	0.607	-0.09	0.051	0.914	(0.827-1.01)	0.078
rs6849344	4p15.33	14864612	T	C	0.046	0.457	0.124	0.071	1.132	(0.985-1.301)	0.081
rs57030948	4p15.33	14819364	G	C	0.072	0.616	-0.085	0.049	0.919	(0.834-1.011)	0.084
rs6449088	4p15.33	14843063	A	T	0.442	0.886	0.037	0.022	1.038	(0.994-1.083)	0.084
rs191116944	4p15.33	14838231	A	G	0.023	0.5	-0.162	0.094	0.85	(0.707-1.022)	0.085
rs11726211	4p15.33	14860525	G	A	0.061	0.559	-0.097	0.056	0.908	(0.813-1.013)	0.086
rs182282740	4p15.33	14838219	T	C	0.05	0.489	-0.108	0.067	0.898	(0.787-1.024)	0.104
chr4:14889010:I	4p15.33	14889010	G	GT	0.143	0.471	0.067	0.042	1.069	(0.985-1.161)	0.107
rs11931357	4p15.33	14865262	T	C	0.044	0.452	0.116	0.073	1.123	(0.973-1.296)	0.111
rs75711328	4p15.33	14834432	C	T	0.178	0.872	0.044	0.028	1.045	(0.989-1.104)	0.114
rs76696912	4p15.33	14837741	T	C	0.179	0.883	0.044	0.028	1.045	(0.989-1.104)	0.114
rs77188319	4p15.33	14855260	G	A	0.02	0.525	0.155	0.098	1.168	(0.964-1.415)	0.115
rs60366696	4p15.33	14865349	T	A	0.044	0.449	0.113	0.073	1.12	(0.97-1.292)	0.119
rs56177328	4p15.33	14855256	C	G	0.238	0.976	-0.037	0.024	0.964	(0.919-1.01)	0.121
rs150959381	4p15.33	14847675	C	T	0.008	0.509	-0.247	0.159	0.781	(0.572-1.067)	0.121
rs78766920	4p15.33	14898610	T	C	0.006	0.442	-0.322	0.208	0.725	(0.482-1.089)	0.122
chr4:14809011:I	4p15.33	14809011	A	AT	0.259	0.882	0.038	0.025	1.039	(0.989-1.091)	0.122
chr4:14835107:D	4p15.33	14835107	GA	G	0.512	0.822	0.034	0.022	1.035	(0.991-1.08)	0.122
rs67701072	4p15.33	14858030	C	T	0.189	0.836	-0.043	0.028	0.958	(0.907-1.012)	0.123
rs16891108	4p15.33	14862873	T	C	0.266	0.561	0.047	0.03	1.048	(0.988-1.112)	0.124
rs77107200	4p15.33	14835087	C	T	0.178	0.879	0.043	0.028	1.044	(0.988-1.103)	0.125
rs74858319	4p15.33	14856442	T	C	0.197	0.913	0.041	0.027	1.042	(0.988-1.098)	0.125
rs56848612	4p15.33	14856470	G	A	0.238	0.972	-0.037	0.024	0.964	(0.919-1.01)	0.125
rs12507849	4p15.33	14848086	T	G	0.175	0.953	0.041	0.027	1.042	(0.988-1.098)	0.125
rs13114642	4p15.33	14847751	T	C	0.175	0.953	0.041	0.027	1.042	(0.988-1.098)	0.126
rs75351747	4p15.33	14835094	A	T	0.179	0.881	0.043	0.028	1.044	(0.988-1.103)	0.127
rs16891104	4p15.33	14860842	T	C	0.212	0.55	0.051	0.033	1.052	(0.986-1.123)	0.128
rs6853723	4p15.33	14812561	T	C	0.255	0.891	0.038	0.025	1.039	(0.989-1.091)	0.128
rs114823043	4p15.33	14814225	C	A	0.068	0.637	0.076	0.05	1.079	(0.978-1.19)	0.130
rs59145515	4p15.33	14839071	T	C	0.191	0.827	0.042	0.028	1.043	(0.987-1.102)	0.131
rs34138752	4p15.33	14808572	T	G	0.263	0.901	0.036	0.024	1.037	(0.989-1.087)	0.134
rs11723465	4p15.33	14831131	A	G	0.217	0.653	0.046	0.031	1.047	(0.985-1.113)	0.134
rs115052339	4p15.33	14808420	A	G	0.019	0.52	0.157	0.105	1.17	(0.952-1.437)	0.135
rs35984733	4p15.33	14888687	G	C	0.181	0.601	0.051	0.034	1.052	(0.984-1.125)	0.135
rs186015465	4p15.33	14838535	A	T	0.056	0.539	0.089	0.06	1.093	(0.972-1.229)	0.137
rs34988173	4p15.33	14824107	C	T	0.255	0.859	0.037	0.025	1.038	(0.988-1.09)	0.137
chr4:14868106:D	4p15.33	14868106	GAT	G	0.495	0.476	0.043	0.029	1.044	(0.986-1.105)	0.138
rs76424636	4p15.33	14856837	C	A	0.015	0.512	0.172	0.116	1.188	(0.946-1.491)	0.138
rs9992384	4p15.33	14811260	G	T	0.253	0.89	0.037	0.025	1.038	(0.988-1.09)	0.141
rs13146676	4p15.33	14812247	T	A	0.256	0.896	0.036	0.025	1.037	(0.987-1.089)	0.141
rs11721768	4p15.33	14814112	A	G	0.256	0.895	0.036	0.025	1.037	(0.987-1.089)	0.141
rs7692506	4p15.33	14817096	T	C	0.267	0.887	0.036	0.024	1.037	(0.989-1.087)	0.141
rs75527339	4p15.33	14851636	A	T	0.011	0.564	0.194	0.132	1.214	(0.937-1.573)	0.142
rs6811874	4p15.33	14813651	A	G	0.256	0.897	0.036	0.025	1.037	(0.987-1.089)	0.142
rs11735837	4p15.33	14811584	T	C	0.256	0.896	0.036	0.025	1.037	(0.987-1.089)	0.144
rs13145996	4p15.33	14811962	T	C	0.256	0.896	0.036	0.025	1.037	(0.987-1.089)	0.144
rs11735799	4p15.33	14811725	A	T	0.256	0.896	0.036	0.025	1.037	(0.987-1.089)	0.144
rs4235370	4p15.33	14844405	A	G	0.273	1	0.033	0.023	1.034	(0.988-1.081)	0.145
rs140726571	4p15.33	14856630	T	G	0.006	0.441	-0.284	0.196	0.753	(0.513-1.105)	0.146
rs28532248	4p15.33	14862961	A	G	0.268	0.561	0.044	0.03	1.045	(0.985-1.108)	0.147
rs17440311	4p15.33	14885375	A	C	0.176	0.609	0.049	0.034	1.05	(0.983-1.123)	0.147
rs10030752	4p15.33	14809211	G	A	0.263	0.905	0.035	0.024	1.036	(0.988-1.085)	0.148
rs11734060	4p15.33	14814309	C	G	0.256	0.894	0.036	0.025	1.037	(0.987-1.089)	0.148
rs28478794	4p15.33	14817175	C	T	0.257	0.88	0.036	0.025	1.037	(0.987-1.089)	0.148
rs13109372	4p15.33	14823750	G	T	0.255	0.859	0.036	0.025	1.037	(0.987-1.089)	0.148
rs28415631	4p15.33	14815510	T	A	0.201	0.672	-0.044	0.03	0.957	(0.902-1.015)	0.148
rs76949526	4p15.33	14835343	T	C	0.179	0.881	0.04	0.028	1.041	(0.985-1.1)	0.149
rs1316686	4p15.33	14853491	A	G	0.234	1	-0.034	0.024	0.967	(0.922-1.013)	0.149
rs75738561	4p15.33	14907990	A	G	0.157	0.46	0.058	0.041	1.06	(0.978-1.148)	0.151
rs77167601	4p15.33	14836667	A	G	0.509	0.826	0.032	0.022	1.033	(0.989-1.078)	0.152
rs7670720	4p15.33	14837203	A	T	0.509	0.826	0.032	0.022	1.033	(0.989-1.078)	0.153
rs6449087	4p15.33	14835872	G	A	0.509	0.825	0.032	0.022	1.033	(0.989-1.078)	0.153
rs13146004	4p15.33	14811976	T	G	0.255	0.894	0.035	0.025	1.036	(0.986-1.088)	0.153
rs11734177	4p15.33	14814612	C	T	0.258	0.89	0.035	0.025	1.036	(0.986-1.088)	0.154
rs62409389	4p15.33	14819615	C	T	0.264	0.888	0.035	0.024	1.036	(0.988-1.085)	0.154
rs139021989	4p15.33	14818288	T	C	0.006	0.6	-0.257	0.18	0.773	(0.543-1.101)	0.155
rs4385054	4p15.33	14865028	T	A	0.396	0.527	0.04	0.028	1.041	(0.985-1.1)	0.155
rs62409388	4p15.33	14819402	G	A	0.266	0.885	0.034	0.024	1.035	(0.987-1.084)	0.160
rs4618307	4p15.33	14851233	T	C	0.233	0.985	-0.033	0.024	0.968	(0.923-1.014)	0.162
rs10428396	4p15.33	14846576	A	G	0.181	0.909	0.038	0.027	1.039	(0.985-1.095)	0.163
rs10428405	4p15.33	14846047	T	C	0.181	0.909	0.038	0.027	1.039	(0.985-1.095)	0.164
rs13114417	4p15.33	14840477	G	A	0.18	0.904	0.038	0.028	1.039	(0.983-1.097)	0.165
rs181556856	4p15.33	14838454	G	A	0.111	0.562	0.059	0.043	1.061	(0.975-1.154)	0.168
rs35953858	4p15.33	14824485	G	C	0.255	0.856	0.035	0.025	1.036	(0.986-1.088)	0.171
rs73239325	4p15.33	14839241	A	G	0.175	0.904	0.038	0.028	1.039	(0.983-1.097)	0.171
rs6853241	4p15.33	14814827	G	A	0.259	0.888	0.034	0.025	1.035	(0.985-1.087)	0.172
rs66510040	4p15.33	14839282	G	T	0.175	0.904	0.038	0.028	1.039	(0.983-1.097)	0.175
rs4367167	4p15.33	14825726	C	G	0.257	0.851	0.034	0.025	1.035	(0.985-1.087)	0.176
rs62410772	4p15.33	14868420	G	A	0.029	0.618	0.103	0.076	1.108	(0.955-1.287)	0.178
rs62410775	4p15.33	14870856	A	G	0.339	0.517	0.04	0.03	1.041	(0.981-1.104)	0.179
rs9994946	4p15.33	14882553	G	C	0.101	0.466	-0.066	0.049	0.936	(0.85-1.03)	0.180
rs13134953	4p15.33	14839245	A	C	0.175	0.904	0.037	0.028	1.038	(0.982-1.096)	0.180
rs4393990	4p15.33	14825832	C	T	0.257	0.851	0.034	0.025	1.035	(0.985-1.087)	0.181
rs4312754	4p15.33	14826035	A	G	0.264	0.859	0.033	0.025	1.034	(0.984-1.085)	0.181
rs4235371	4p15.33	14844599	T	A	0.273	0.996	0.03	0.023	1.03	(0.985-1.078)	0.181
rs60044667	4p15.33	14838837	G	A	0.206	0.591	0.043	0.032	1.044	(0.98-1.112)	0.183
rs35348441	4p15.33	14841195	A	G	0.176	0.915	0.037	0.028	1.038	(0.982-1.096)	0.183
rs138013982	4p15.33	14863850	T	C	0.022	0.503	0.128	0.096	1.137	(0.942-1.372)	0.184
rs11725087	4p15.33	14866931	T	A	0.338	0.517	0.039	0.03	1.04	(0.98-1.103)	0.184
rs78869989	4p15.33	14857649	C	T	0.186	0.849	0.037	0.028	1.038	(0.982-1.096)	0.185
rs13149331	4p15.33	14827868	T	C	0.266	0.839	0.033	0.025	1.034	(0.984-1.085)	0.187
rs12506349	4p15.33	14842470	A	G	0.177	0.917	0.036	0.028	1.037	(0.981-1.095)	0.187
rs4274836	4p15.33	14825606	G	T	0.254	0.854	0.033	0.025	1.034	(0.984-1.085)	0.188
rs56888185	4p15.33	14877095	C	T	0.031	0.609	0.098	0.074	1.103	(0.954-1.275)	0.188
rs76822417	4p15.33	14855502	C	T	0.182	0.89	0.036	0.028	1.037	(0.981-1.095)	0.188
rs4698300	4p15.33	14864246	T	C	0.264	0.557	0.04	0.031	1.041	(0.979-1.106)	0.190
rs11729993	4p15.33	14880725	C	A	0.03	0.66	0.095	0.073	1.1	(0.953-1.269)	0.191
rs76209789	4p15.33	14857744	A	G	0.183	0.857	0.037	0.028	1.038	(0.982-1.096)	0.194
chr4:14810768:D	4p15.33	14810768	CT	C	0.253	0.888	0.032	0.025	1.033	(0.983-1.084)	0.194
rs12504919	4p15.33	14840107	T	C	0.177	0.913	0.036	0.028	1.037	(0.981-1.095)	0.196
rs13147077	4p15.33	14840094	T	C	0.177	0.913	0.036	0.028	1.037	(0.981-1.095)	0.196
rs12504056	4p15.33	14839976	A	G	0.177	0.913	0.036	0.028	1.037	(0.981-1.095)	0.196
rs35853785	4p15.33	14839570	T	C	0.177	0.912	0.036	0.028	1.037	(0.981-1.095)	0.196
rs67612643	4p15.33	14839359	C	T	0.174	0.906	0.036	0.028	1.037	(0.981-1.095)	0.197
rs78853830	4p15.33	14893707	T	C	0.095	0.477	0.064	0.05	1.066	(0.967-1.176)	0.199
rs80018620	4p15.33	14839158	C	T	0.174	0.9	0.036	0.028	1.037	(0.981-1.095)	0.201
rs59834149	4p15.33	14838936	T	C	0.043	0.468	-0.093	0.073	0.911	(0.79-1.051)	0.202
rs12502388	4p15.33	14842391	C	T	0.177	0.909	0.035	0.028	1.036	(0.98-1.094)	0.202
chr4:14860094:D	4p15.33	14860094	TATATAC	T	0.019	0.444	-0.141	0.111	0.868	(0.699-1.08)	0.203
rs6848585	4p15.33	14879196	C	T	0.03	0.642	0.094	0.074	1.099	(0.95-1.27)	0.204
rs190013472	4p15.33	14838431	G	A	0.105	0.571	0.055	0.044	1.057	(0.969-1.152)	0.206
rs9684851	4p15.33	14842083	A	G	0.419	0.78	0.029	0.023	1.029	(0.984-1.077)	0.208
rs35653965	4p15.33	14839619	C	G	0.176	0.909	0.035	0.028	1.036	(0.98-1.094)	0.209
rs4572875	4p15.33	14833497	A	C	0.267	0.742	0.033	0.027	1.034	(0.98-1.09)	0.211
rs190771817	4p15.33	14837020	G	A	0.008	0.567	-0.186	0.15	0.83	(0.619-1.114)	0.215
chr4:14868090:D	4p15.33	14868090	GAT	G	0.025	0.451	0.119	0.096	1.126	(0.933-1.36)	0.216
rs2315335	4p15.33	14857206	T	G	0.613	0.882	0.027	0.022	1.027	(0.984-1.073)	0.216
rs34917366	4p15.33	14870383	C	T	0.615	0.507	0.035	0.029	1.036	(0.978-1.096)	0.222
rs13146235	4p15.33	14821743	G	T	0.01	0.479	0.181	0.149	1.198	(0.895-1.605)	0.223
rs77606320	4p15.33	14841723	C	T	0.175	0.91	0.034	0.028	1.035	(0.979-1.093)	0.223
rs1826705	4p15.33	14853337	T	C	0.615	0.949	0.026	0.021	1.026	(0.985-1.069)	0.224
rs4459987	4p15.33	14832866	G	C	0.566	0.615	0.031	0.026	1.031	(0.98-1.085)	0.226
chr4:14815508:D	4p15.33	14815508	AT	A	0.029	0.558	-0.097	0.08	0.908	(0.776-1.062)	0.228
rs144095555	4p15.33	14846757	G	A	0.139	0.583	0.046	0.038	1.047	(0.972-1.128)	0.229
rs12646676	4p15.33	14874657	G	A	0.031	0.626	0.089	0.074	1.093	(0.946-1.264)	0.230
rs62409413	4p15.33	14837719	G	T	0.051	0.651	0.067	0.056	1.069	(0.958-1.193)	0.235
rs9990522	4p15.33	14886330	G	A	0.434	0.531	0.033	0.028	1.034	(0.978-1.092)	0.235
rs6817671	4p15.33	14877900	A	G	0.033	0.612	0.086	0.073	1.09	(0.945-1.257)	0.239
rs67009196	4p15.33	14839131	A	G	0.163	0.874	0.034	0.029	1.035	(0.977-1.095)	0.239
rs7680180	4p15.33	14830000	G	A	0.493	0.893	-0.025	0.021	0.975	(0.936-1.016)	0.241
rs56241120	4p15.33	14838959	C	T	0.299	0.632	0.032	0.027	1.033	(0.979-1.089)	0.242
rs11930642	4p15.33	14829588	T	G	0.491	0.938	-0.024	0.021	0.976	(0.937-1.017)	0.243
rs2047203	4p15.33	14865904	A	T	0.311	0.503	0.036	0.031	1.037	(0.976-1.102)	0.243
rs79633987	4p15.33	14845158	C	T	0.01	0.612	0.15	0.129	1.162	(0.902-1.496)	0.243
rs1874206	4p15.33	14871655	T	C	0.615	0.507	0.034	0.029	1.035	(0.977-1.095)	0.245
rs35624253	4p15.33	14841338	C	A	0.169	0.891	0.033	0.028	1.034	(0.978-1.092)	0.245
rs6449086	4p15.33	14835844	G	T	0.565	0.801	0.026	0.023	1.026	(0.981-1.074)	0.245
rs56234517	4p15.33	14848843	C	T	0.118	0.893	0.038	0.033	1.039	(0.974-1.108)	0.248
rs6857368	4p15.33	14829039	A	G	0.492	0.941	-0.024	0.021	0.976	(0.937-1.017)	0.249
rs4254765	4p15.33	14825196	T	C	0.505	0.962	-0.024	0.02	0.976	(0.939-1.015)	0.250
rs61304755	4p15.33	14893478	T	C	0.478	0.522	0.032	0.028	1.033	(0.977-1.091)	0.252
rs9884305	4p15.33	14888787	G	A	0.48	0.521	0.032	0.028	1.033	(0.977-1.091)	0.253
rs111299667	4p15.33	14868513	C	A	0.199	0.505	0.04	0.036	1.041	(0.97-1.117)	0.261
rs2009285	4p15.33	14884329	T	C	0.481	0.519	0.031	0.028	1.031	(0.976-1.09)	0.264
rs4475143	4p15.33	14835668	G	A	0.112	0.656	0.044	0.039	1.045	(0.968-1.128)	0.264
rs62410830	4p15.33	14905644	A	G	0.479	0.521	0.031	0.028	1.031	(0.976-1.09)	0.266
rs56069845	4p15.33	14813687	T	C	0.13	0.787	-0.037	0.034	0.964	(0.902-1.03)	0.266
rs923985	4p15.33	14877062	A	T	0.431	0.514	0.032	0.029	1.033	(0.975-1.093)	0.266
rs139021470	4p15.33	14893788	A	C	0.013	0.368	-0.164	0.148	0.849	(0.635-1.134)	0.267
rs4698302	4p15.33	14872771	A	G	0.615	0.506	0.032	0.029	1.033	(0.975-1.093)	0.267
chr4:14866042:I	4p15.33	14866042	C	CT	0.025	0.449	0.107	0.097	1.113	(0.92-1.346)	0.269
rs56053961	4p15.33	14869293	G	C	0.199	0.505	0.039	0.035	1.04	(0.971-1.114)	0.269
rs62410831	4p15.33	14906633	T	C	0.048	0.947	0.053	0.048	1.054	(0.96-1.158)	0.271
rs62410785	4p15.33	14881307	G	A	0.143	0.601	0.04	0.037	1.041	(0.968-1.119)	0.273
rs190818247	4p15.33	14839001	A	C	0.065	0.564	0.06	0.055	1.062	(0.953-1.183)	0.273
rs80330178	4p15.33	14896574	G	A	0.012	0.491	0.143	0.132	1.154	(0.891-1.494)	0.279
rs115464316	4p15.33	14887863	G	A	0.012	0.492	0.142	0.132	1.153	(0.89-1.493)	0.279
rs34713879	4p15.33	14845741	C	T	0.122	0.868	0.036	0.033	1.037	(0.972-1.106)	0.279
rs190363998	4p15.33	14898603	A	G	0.007	0.531	-0.173	0.161	0.841	(0.614-1.153)	0.281
rs4469071	4p15.33	14819796	T	C	0.498	1	-0.022	0.02	0.978	(0.941-1.017)	0.282
rs9997562	4p15.33	14896179	T	C	0.479	0.522	0.03	0.028	1.03	(0.975-1.089)	0.284
rs12503719	4p15.33	14844881	A	C	0.115	0.87	0.036	0.034	1.037	(0.97-1.108)	0.285
rs12499803	4p15.33	14844879	C	A	0.115	0.87	0.036	0.034	1.037	(0.97-1.108)	0.286
rs12499804	4p15.33	14844891	C	G	0.115	0.87	0.036	0.034	1.037	(0.97-1.108)	0.286
rs12507189	4p15.33	14844893	G	A	0.115	0.87	0.036	0.034	1.037	(0.97-1.108)	0.286
rs71597560	4p15.33	14827355	G	A	0.009	0.448	0.173	0.163	1.189	(0.864-1.636)	0.289
rs62409425	4p15.33	14847759	T	C	0.06	0.824	0.049	0.047	1.05	(0.958-1.152)	0.289
rs6825119	4p15.33	14879258	A	G	0.031	0.643	0.076	0.072	1.079	(0.937-1.242)	0.292
chr4:14838098:D	4p15.33	14838098	GTATAT	G	0.19	0.763	0.031	0.029	1.031	(0.974-1.092)	0.293
rs74475120	4p15.33	14881990	C	G	0.134	0.489	0.044	0.042	1.045	(0.962-1.135)	0.296
rs59429012	4p15.33	14875008	T	C	0.169	0.582	0.037	0.035	1.038	(0.969-1.111)	0.297
rs192327601	4p15.33	14868913	G	A	0.006	0.435	0.215	0.206	1.24	(0.828-1.857)	0.298
rs4301109	4p15.33	14816497	C	T	0.497	0.988	-0.021	0.02	0.979	(0.942-1.018)	0.299
rs7658940	4p15.33	14818982	T	C	0.499	0.99	-0.021	0.02	0.979	(0.942-1.018)	0.300
rs78503145	4p15.33	14812814	T	C	0.132	0.701	0.037	0.036	1.038	(0.967-1.114)	0.300
rs13138689	4p15.33	14874745	A	G	0.615	0.506	0.03	0.029	1.03	(0.974-1.091)	0.302
rs114124071	4p15.33	14859210	C	T	0.028	0.484	-0.09	0.088	0.914	(0.769-1.086)	0.304
rs11730797	4p15.33	14877547	T	A	0.43	0.514	0.029	0.029	1.029	(0.973-1.09)	0.304
rs58164434	4p15.33	14876512	T	C	0.201	0.507	0.036	0.035	1.037	(0.968-1.11)	0.305
rs56129512	4p15.33	14849232	G	C	0.123	0.891	0.033	0.033	1.034	(0.969-1.103)	0.305
rs183407572	4p15.33	14835696	C	T	0.03	0.511	0.085	0.083	1.089	(0.925-1.281)	0.306
rs6850085	4p15.33	14866685	C	A	0.191	0.501	0.037	0.036	1.038	(0.967-1.114)	0.306
rs34417894	4p15.33	14843744	G	A	0.117	0.882	0.034	0.033	1.035	(0.97-1.104)	0.307
chr4:14844942:D	4p15.33	14844942	TTCTC	T	0.122	0.865	0.033	0.033	1.034	(0.969-1.103)	0.311
rs147338822	4p15.33	14836224	G	T	0.013	0.493	0.127	0.126	1.135	(0.887-1.453)	0.312
rs190665266	4p15.33	14838639	T	C	0.082	0.623	0.047	0.046	1.048	(0.958-1.147)	0.312
chr4:14844375:D	4p15.33	14844375	GTAATC	G	0.117	0.885	0.034	0.033	1.035	(0.97-1.104)	0.313
rs12512088	4p15.33	14844576	G	A	0.117	0.885	0.034	0.033	1.035	(0.97-1.104)	0.313
rs12504449	4p15.33	14843950	C	G	0.118	0.883	0.034	0.033	1.035	(0.97-1.104)	0.313
rs4301110	4p15.33	14816802	C	G	0.498	0.988	-0.02	0.02	0.98	(0.943-1.019)	0.313
rs13112451	4p15.33	14843286	A	G	0.118	0.882	0.034	0.033	1.035	(0.97-1.104)	0.313
rs13135577	4p15.33	14843101	G	C	0.118	0.882	0.034	0.033	1.035	(0.97-1.104)	0.313
rs12503362	4p15.33	14843006	C	T	0.118	0.882	0.034	0.033	1.035	(0.97-1.104)	0.313
rs12510758	4p15.33	14842798	G	A	0.118	0.881	0.034	0.033	1.035	(0.97-1.104)	0.313
rs11731529	4p15.33	14811750	C	T	0.49	1	-0.02	0.02	0.98	(0.943-1.019)	0.316
rs73239326	4p15.33	14839416	G	A	0.118	0.875	0.033	0.033	1.034	(0.969-1.103)	0.317
rs114948904	4p15.33	14809555	G	A	0.01	0.67	-0.125	0.126	0.882	(0.689-1.13)	0.320
rs73241347	4p15.33	14843481	A	G	0.01	0.677	-0.121	0.122	0.886	(0.698-1.125)	0.321
rs6841539	4p15.33	14811600	A	T	0.49	0.999	-0.02	0.02	0.98	(0.943-1.019)	0.323
rs10023036	4p15.33	14809157	T	A	0.49	0.994	-0.02	0.02	0.98	(0.943-1.019)	0.326
rs28477534	4p15.33	14860102	C	T	0.106	0.615	-0.041	0.042	0.96	(0.884-1.042)	0.327
chr4:14906585:I	4p15.33	14906585	C	CCTG	0.483	0.516	0.027	0.028	1.027	(0.973-1.085)	0.330
chr4:14884121:D	4p15.33	14884121	GAGA	G	0.048	0.975	0.046	0.048	1.047	(0.953-1.15)	0.331
rs62410771	4p15.33	14868141	T	G	0.221	0.494	0.034	0.035	1.035	(0.966-1.108)	0.331
rs4443273	4p15.33	14808684	C	T	0.489	0.992	-0.02	0.02	0.98	(0.943-1.019)	0.331
rs60098105	4p15.33	14842451	C	T	0.051	0.786	0.05	0.051	1.051	(0.951-1.162)	0.334
rs60915162	4p15.33	14837178	C	A	0.026	0.527	-0.084	0.087	0.919	(0.775-1.09)	0.336
rs11932844	4p15.33	14860702	T	A	0.168	0.612	-0.033	0.034	0.968	(0.905-1.034)	0.341
rs184745554	4p15.33	14838266	T	A	0.064	0.549	0.053	0.056	1.054	(0.945-1.177)	0.342
chr4:14906580:I	4p15.33	14906580	T	TTCC	0.482	0.515	0.026	0.028	1.026	(0.972-1.084)	0.343
rs180860613	4p15.33	14839002	T	G	0.038	0.55	-0.067	0.071	0.935	(0.814-1.075)	0.344
rs115914504	4p15.33	14877263	C	A	0.036	0.588	0.066	0.07	1.068	(0.931-1.225)	0.344
rs184240581	4p15.33	14838293	G	A	0.086	0.518	-0.047	0.05	0.954	(0.865-1.052)	0.345
rs188655330	4p15.33	14838939	A	T	0.036	0.437	-0.077	0.081	0.926	(0.79-1.085)	0.346
rs6828558	4p15.33	14820649	T	C	0.499	0.987	-0.019	0.02	0.981	(0.943-1.02)	0.349
rs12650203	4p15.33	14891546	C	A	0.05	1	0.043	0.046	1.044	(0.954-1.142)	0.353
rs62409391	4p15.33	14834337	C	T	0.177	0.751	0.028	0.03	1.028	(0.97-1.091)	0.358
rs73130664	4p15.33	14859764	T	C	0.029	0.423	-0.084	0.092	0.919	(0.768-1.101)	0.361
rs62410823	4p15.33	14886018	T	G	0.049	0.991	0.043	0.047	1.044	(0.952-1.145)	0.363
rs56115610	4p15.33	14861822	C	T	0.258	0.597	0.027	0.03	1.027	(0.969-1.09)	0.364
rs62410824	4p15.33	14886875	T	A	0.049	0.993	0.042	0.047	1.043	(0.951-1.144)	0.364
rs183009137	4p15.33	14839049	A	T	0.082	0.577	-0.044	0.048	0.957	(0.871-1.051)	0.365
rs4470621	4p15.33	14834859	G	A	0.182	0.782	0.027	0.029	1.027	(0.971-1.087)	0.365
rs34412794	4p15.33	14847225	C	T	0.116	0.881	0.03	0.034	1.03	(0.964-1.101)	0.367
rs41335947	4p15.33	14890310	C	T	0.049	0.997	0.042	0.047	1.043	(0.951-1.144)	0.367
rs73224716	4p15.33	14862141	A	G	0.258	0.595	0.027	0.03	1.027	(0.969-1.09)	0.367
rs6812113	4p15.33	14823299	G	A	0.494	1	-0.018	0.02	0.982	(0.944-1.021)	0.369
rs16891148	4p15.33	14902808	T	C	0.048	1	0.042	0.047	1.043	(0.951-1.144)	0.369
rs62409412	4p15.33	14837017	C	T	0.063	0.719	0.044	0.049	1.045	(0.949-1.15)	0.371
rs182696678	4p15.33	14821624	C	T	0.009	0.668	-0.117	0.131	0.89	(0.688-1.15)	0.371
rs35033069	4p15.33	14841282	C	T	0.116	0.872	0.03	0.034	1.03	(0.964-1.101)	0.374
rs188100381	4p15.33	14838609	T	C	0.13	0.591	0.034	0.038	1.035	(0.96-1.115)	0.379
rs12643375	4p15.33	14868461	T	G	0.605	0.498	0.026	0.029	1.026	(0.97-1.086)	0.381
rs71597561	4p15.33	14829782	G	A	0.019	0.491	0.093	0.106	1.097	(0.892-1.351)	0.381
rs5016275	4p15.33	14834849	C	G	0.183	0.778	0.026	0.029	1.026	(0.97-1.086)	0.385
rs79393402	4p15.33	14837747	C	A	0.059	0.701	0.044	0.051	1.045	(0.946-1.155)	0.388
chr4:14808958:D	4p15.33	14808958	CT	C	0.023	0.457	0.086	0.1	1.09	(0.896-1.326)	0.389
rs57828741	4p15.33	14842076	G	C	0.158	0.862	0.026	0.03	1.026	(0.968-1.088)	0.389
rs11722528	4p15.33	14863663	C	T	0.221	0.567	0.028	0.032	1.028	(0.966-1.095)	0.390
rs62410828	4p15.33	14896904	A	G	0.049	0.998	0.04	0.047	1.041	(0.949-1.141)	0.390
rs16891135	4p15.33	14895945	G	A	0.049	1	0.04	0.047	1.041	(0.949-1.141)	0.391
rs186697571	4p15.33	14838111	C	T	0.088	0.564	-0.04	0.047	0.961	(0.876-1.054)	0.394
rs62410788	4p15.33	14884053	C	T	0.129	0.491	0.036	0.043	1.037	(0.953-1.128)	0.395
chr4:14839097:I	4p15.33	14839097	G	GTATATAT	0.142	0.851	0.027	0.031	1.027	(0.967-1.092)	0.395
rs62409428	4p15.33	14854641	A	T	0.141	0.85	0.027	0.031	1.027	(0.967-1.092)	0.397
rs62410789	4p15.33	14884532	C	T	0.129	0.491	0.036	0.043	1.037	(0.953-1.128)	0.398
rs114753306	4p15.33	14896503	G	A	0.009	0.673	0.115	0.136	1.122	(0.859-1.465)	0.399
rs56137192	4p15.33	14838984	T	G	0.17	0.578	-0.029	0.035	0.971	(0.907-1.04)	0.410
rs11726698	4p15.33	14865643	G	A	0.785	0.481	-0.029	0.035	0.971	(0.907-1.04)	0.410
rs190919621	4p15.33	14838545	T	A	0.006	0.398	0.17	0.207	1.185	(0.79-1.778)	0.411
rs181341705	4p15.33	14838316	G	A	0.02	0.495	0.085	0.103	1.089	(0.89-1.332)	0.414
rs16891136	4p15.33	14896043	G	A	0.049	1	0.038	0.047	1.039	(0.947-1.139)	0.417
rs28435453	4p15.33	14863908	T	C	0.006	0.428	-0.162	0.2	0.85	(0.575-1.259)	0.418
rs12642724	4p15.33	14868462	A	G	0.604	0.497	0.023	0.029	1.023	(0.967-1.083)	0.422
chr4:14861252:I	4p15.33	14861252	A	AG	0.338	0.55	0.023	0.029	1.023	(0.967-1.083)	0.428
rs10034460	4p15.33	14883047	T	A	0.128	0.491	0.033	0.043	1.034	(0.95-1.124)	0.437
rs71597563	4p15.33	14901902	A	T	0.041	0.433	-0.06	0.078	0.942	(0.808-1.097)	0.439
rs76259610	4p15.33	14810087	T	C	0.019	0.407	-0.09	0.117	0.914	(0.727-1.149)	0.440
rs60818160	4p15.33	14854689	T	C	0.292	0.944	-0.017	0.023	0.983	(0.94-1.028)	0.444
rs140385208	4p15.33	14863654	C	T	0.006	0.541	0.132	0.175	1.141	(0.81-1.608)	0.451
rs35212452	4p15.33	14821805	T	G	0.014	0.702	0.078	0.103	1.081	(0.883-1.323)	0.451
rs2006754	4p15.33	14882122	G	A	0.528	0.516	0.021	0.028	1.021	(0.967-1.079)	0.453
rs56918392	4p15.33	14838842	T	C	0.042	0.544	-0.051	0.068	0.95	(0.832-1.086)	0.455
rs10939596	4p15.33	14837717	T	C	0.183	0.785	0.022	0.029	1.022	(0.966-1.082)	0.455
rs10805341	4p15.33	14836025	T	A	0.181	0.785	0.022	0.029	1.022	(0.966-1.082)	0.457
rs146830320	4p15.33	14810798	G	T	0.008	0.467	-0.123	0.166	0.884	(0.639-1.224)	0.457
rs34586505	4p15.33	14836663	C	T	0.181	0.785	0.022	0.029	1.022	(0.966-1.082)	0.457
rs10805340	4p15.33	14835918	A	G	0.181	0.785	0.022	0.029	1.022	(0.966-1.082)	0.458
rs4698298	4p15.33	14863504	T	C	0.226	0.579	0.023	0.032	1.023	(0.961-1.089)	0.458
rs73239319	4p15.33	14837111	G	A	0.181	0.785	0.022	0.029	1.022	(0.966-1.082)	0.458
rs34023436	4p15.33	14836239	A	G	0.181	0.785	0.022	0.029	1.022	(0.966-1.082)	0.458
rs67608178	4p15.33	14837091	T	C	0.181	0.785	0.022	0.029	1.022	(0.966-1.082)	0.458
rs2872899	4p15.33	14861270	T	C	0.339	0.55	0.021	0.029	1.021	(0.965-1.081)	0.458
rs4698299	4p15.33	14863713	T	C	0.226	0.578	0.023	0.032	1.023	(0.961-1.089)	0.458
rs10755214	4p15.33	14837311	G	T	0.181	0.785	0.022	0.029	1.022	(0.966-1.082)	0.462
rs11730592	4p15.33	14811420	C	T	0.014	0.428	0.098	0.134	1.103	(0.848-1.434)	0.465
rs965444	4p15.33	14861478	T	C	0.34	0.55	0.021	0.029	1.021	(0.965-1.081)	0.467
rs112535008	4p15.33	14859908	T	C	0.029	0.509	0.061	0.084	1.063	(0.902-1.253)	0.467
chr4:14839704:D	4p15.33	14839704	CT	C	0.597	0.909	0.015	0.021	1.015	(0.974-1.058)	0.471
rs191707200	4p15.33	14838112	A	G	0.114	0.6	0.029	0.041	1.029	(0.95-1.116)	0.478
chr4:14858227:D	4p15.33	14858227	CCA	C	0.046	0.673	-0.041	0.058	0.96	(0.857-1.075)	0.484
rs11721472	4p15.33	14862951	C	T	0.169	0.562	0.025	0.036	1.025	(0.955-1.1)	0.489
chr4:14819721:I	4p15.33	14819721	C	CT	0.031	0.702	0.048	0.069	1.049	(0.916-1.201)	0.489
rs10939597	4p15.33	14837753	C	T	0.182	0.786	0.02	0.029	1.02	(0.964-1.08)	0.490
rs10939595	4p15.33	14837656	C	T	0.182	0.786	0.02	0.029	1.02	(0.964-1.08)	0.490
rs190396434	4p15.33	14839057	A	C	0.08	0.641	0.031	0.046	1.031	(0.943-1.129)	0.499
rs62410787	4p15.33	14882187	C	T	0.127	0.491	0.029	0.043	1.029	(0.946-1.12)	0.501
rs142189515	4p15.33	14813916	C	A	0.006	0.537	-0.119	0.177	0.888	(0.628-1.256)	0.502
rs78793770	4p15.33	14833078	C	T	0.256	0.587	-0.02	0.03	0.98	(0.924-1.04)	0.503
rs11730869	4p15.33	14877976	A	T	0.234	0.499	0.022	0.033	1.022	(0.958-1.091)	0.513
rs190944182	4p15.33	14838477	G	A	0.081	0.538	-0.032	0.05	0.969	(0.878-1.068)	0.516
rs11936038	4p15.33	14860649	G	A	0.048	1	-0.031	0.047	0.969	(0.884-1.063)	0.517
rs77344753	4p15.33	14860161	T	C	0.022	0.601	0.056	0.088	1.058	(0.89-1.257)	0.522
rs56178181	4p15.33	14876013	C	T	0.401	0.496	0.019	0.029	1.019	(0.963-1.079)	0.522
rs35875792	4p15.33	14876173	G	A	0.401	0.496	0.019	0.029	1.019	(0.963-1.079)	0.522
rs34618392	4p15.33	14876114	T	C	0.401	0.496	0.019	0.029	1.019	(0.963-1.079)	0.527
rs190000719	4p15.33	14838209	T	A	0.035	0.511	0.049	0.077	1.05	(0.903-1.221)	0.529
rs10001220	4p15.33	14884541	G	A	0.349	0.513	0.018	0.029	1.018	(0.962-1.078)	0.534
rs41328848	4p15.33	14879210	C	T	0.091	0.459	-0.032	0.052	0.969	(0.875-1.072)	0.534
rs6858687	4p15.33	14876427	T	C	0.399	0.498	0.018	0.029	1.018	(0.962-1.078)	0.534
rs923986	4p15.33	14876815	C	T	0.399	0.498	0.018	0.029	1.018	(0.962-1.078)	0.535
rs13146213	4p15.33	14875972	A	C	0.403	0.495	0.018	0.029	1.018	(0.962-1.078)	0.539
rs77980327	4p15.33	14861510	A	G	0.046	0.946	-0.03	0.049	0.97	(0.882-1.068)	0.542
rs13135652	4p15.33	14878492	C	T	0.138	0.535	0.024	0.04	1.024	(0.947-1.108)	0.542
rs67017914	4p15.33	14869937	G	T	0.14	0.526	0.024	0.04	1.024	(0.947-1.108)	0.544
rs66832496	4p15.33	14872306	C	G	0.14	0.526	0.024	0.04	1.024	(0.947-1.108)	0.545
rs12640214	4p15.33	14883847	T	G	0.351	0.512	0.018	0.029	1.018	(0.962-1.078)	0.545
rs139905457	4p15.33	14823896	G	T	0.006	0.485	0.11	0.186	1.116	(0.775-1.607)	0.553
rs147460898	4p15.33	14823857	A	T	0.006	0.485	0.11	0.186	1.116	(0.775-1.607)	0.553
rs6853036	4p15.33	14862122	C	T	0.574	0.593	0.016	0.026	1.016	(0.966-1.069)	0.554
rs74886527	4p15.33	14843863	G	C	0.019	0.732	-0.051	0.088	0.95	(0.8-1.129)	0.559
rs185014409	4p15.33	14835509	A	C	0.009	0.444	-0.095	0.163	0.909	(0.661-1.252)	0.560
rs10032729	4p15.33	14879945	G	A	0.504	0.484	0.017	0.029	1.017	(0.961-1.077)	0.563
rs115676890	4p15.33	14830699	G	A	0.023	0.51	0.055	0.095	1.057	(0.877-1.273)	0.563
chr4:14875691:I	4p15.33	14875691	G	GA	0.393	0.488	0.017	0.03	1.017	(0.959-1.079)	0.566
rs185937911	4p15.33	14839053	T	C	0.072	0.523	0.031	0.054	1.031	(0.928-1.147)	0.566
chr4:14868462:I	4p15.33	14868462	A	AGG	0.589	0.486	0.017	0.029	1.017	(0.961-1.077)	0.569
rs7435358	4p15.33	14884419	T	C	0.353	0.512	0.016	0.029	1.016	(0.96-1.076)	0.571
rs190659806	4p15.33	14828448	A	T	0.007	0.491	-0.102	0.181	0.903	(0.633-1.288)	0.576
chr4:14868119:I	4p15.33	14868119	G	GAT	0.181	0.477	0.021	0.038	1.021	(0.948-1.1)	0.578
rs6834766	4p15.33	14862215	T	A	0.163	0.493	0.021	0.039	1.021	(0.946-1.102)	0.580
rs188370384	4p15.33	14838226	A	T	0.092	0.609	-0.025	0.045	0.975	(0.893-1.065)	0.582
rs73800423	4p15.33	14862532	C	A	0.019	0.382	-0.066	0.119	0.936	(0.741-1.182)	0.583
rs187731431	4p15.33	14838270	G	A	0.073	0.563	0.029	0.053	1.029	(0.928-1.142)	0.585
rs6815830	4p15.33	14906935	T	C	0.13	0.486	0.023	0.043	1.023	(0.941-1.113)	0.596
rs145981144	4p15.33	14861849	T	C	0.042	0.917	-0.028	0.053	0.972	(0.876-1.079)	0.596
rs13133499	4p15.33	14878230	G	T	0.136	0.535	0.021	0.04	1.021	(0.944-1.105)	0.599
rs73800420	4p15.33	14859556	G	A	0.027	0.428	-0.049	0.095	0.952	(0.79-1.147)	0.605
chr4:14860096:I	4p15.33	14860096	T	TATAC	0.124	0.592	-0.02	0.04	0.98	(0.906-1.06)	0.606
chr4:14880795:D	4p15.33	14880795	CTTGAG	C	0.023	0.424	0.052	0.103	1.053	(0.861-1.289)	0.615
rs142671953	4p15.33	14841533	C	A	0.072	0.877	0.021	0.041	1.021	(0.942-1.107)	0.616
rs13110461	4p15.33	14824254	G	C	0.48	0.978	-0.01	0.02	0.99	(0.952-1.03)	0.619
rs189993945	4p15.33	14838312	T	A	0.084	0.564	0.023	0.048	1.023	(0.931-1.124)	0.626
rs146507262	4p15.33	14870116	T	C	0.007	0.528	0.081	0.168	1.084	(0.78-1.507)	0.630
rs60511207	4p15.33	14872968	A	C	0.17	0.502	0.018	0.038	1.018	(0.945-1.097)	0.631
rs10470793	4p15.33	14815505	A	T	0.092	0.57	-0.022	0.046	0.978	(0.894-1.071)	0.635
rs10805338	4p15.33	14835667	C	T	0.157	0.716	0.015	0.033	1.015	(0.952-1.083)	0.636
rs56011584	4p15.33	14875297	T	C	0.17	0.502	0.018	0.038	1.018	(0.945-1.097)	0.637
rs58334425	4p15.33	14872855	A	G	0.17	0.502	0.018	0.038	1.018	(0.945-1.097)	0.637
rs183015836	4p15.33	14838598	C	T	0.215	0.617	0.015	0.031	1.015	(0.955-1.079)	0.638
rs9991540	4p15.33	14881360	G	C	0.09	0.46	-0.024	0.052	0.976	(0.882-1.081)	0.644
rs78398204	4p15.33	14881407	G	T	0.113	0.447	0.022	0.048	1.022	(0.93-1.123)	0.645
rs9991453	4p15.33	14881316	G	A	0.09	0.46	-0.024	0.052	0.976	(0.882-1.081)	0.645
rs191895455	4p15.33	14838247	G	A	0.093	0.495	0.023	0.049	1.023	(0.93-1.126)	0.646
rs11736594	4p15.33	14817539	T	G	0.485	0.966	-0.009	0.021	0.991	(0.951-1.033)	0.646
rs62410783	4p15.33	14877952	G	C	0.17	0.501	0.017	0.038	1.017	(0.944-1.096)	0.648
rs192331139	4p15.33	14903220	C	G	0.033	0.398	0.041	0.09	1.042	(0.873-1.243)	0.649
rs187875764	4p15.33	14838676	A	T	0.033	0.569	-0.033	0.074	0.968	(0.837-1.119)	0.655
rs62409414	4p15.33	14837802	T	A	0.155	0.715	0.015	0.033	1.015	(0.952-1.083)	0.656
rs62410778	4p15.33	14874587	C	T	0.17	0.502	0.017	0.038	1.017	(0.944-1.096)	0.657
rs188466249	4p15.33	14838243	T	A	0.048	0.562	0.027	0.063	1.027	(0.908-1.162)	0.668
rs56284300	4p15.33	14861911	C	T	0.383	0.57	0.012	0.028	1.012	(0.958-1.069)	0.668
rs10805339	4p15.33	14835701	G	A	0.184	0.746	0.013	0.03	1.013	(0.955-1.074)	0.673
rs34857995	4p15.33	14866195	C	T	0.2	0.541	-0.014	0.034	0.986	(0.923-1.054)	0.674
chr4:14848504:I	4p15.33	14848504	A	AT	0.02	0.528	0.042	0.101	1.043	(0.856-1.271)	0.677
rs186529426	4p15.33	14839007	A	G	0.044	0.567	0.027	0.066	1.027	(0.903-1.169)	0.684
rs80322403	4p15.33	14866413	G	A	0.076	0.48	0.022	0.055	1.022	(0.918-1.139)	0.692
rs73130633	4p15.33	14835643	C	A	0.138	0.784	-0.013	0.033	0.987	(0.925-1.053)	0.693
rs73800424	4p15.33	14863900	A	G	0.02	0.384	-0.046	0.118	0.955	(0.758-1.204)	0.697
chr4:14881221:D	4p15.33	14881221	CA	C	0.122	0.498	0.017	0.044	1.017	(0.933-1.109)	0.698
rs78494032	4p15.33	14901472	G	A	0.008	0.412	0.067	0.172	1.069	(0.763-1.498)	0.700
rs58353890	4p15.33	14867935	A	G	0.09	0.46	-0.02	0.052	0.98	(0.885-1.085)	0.701
rs73800429	4p15.33	14867466	G	A	0.09	0.46	-0.02	0.052	0.98	(0.885-1.085)	0.701
rs62410786	4p15.33	14881414	T	C	0.122	0.495	0.017	0.044	1.017	(0.933-1.109)	0.702
rs140744792	4p15.33	14883868	T	C	0.028	0.456	0.034	0.09	1.035	(0.867-1.234)	0.706
rs62409416	4p15.33	14837843	G	A	0.137	0.681	0.013	0.035	1.013	(0.946-1.085)	0.709
rs11736674	4p15.33	14852818	A	C	0.044	0.683	-0.022	0.06	0.978	(0.87-1.1)	0.713
rs113838932	4p15.33	14834237	G	C	0.065	0.865	0.016	0.044	1.016	(0.932-1.108)	0.713
rs75472584	4p15.33	14840724	G	A	0.045	0.643	-0.022	0.061	0.978	(0.868-1.102)	0.719
rs11731171	4p15.33	14844993	G	C	0.045	0.646	-0.022	0.061	0.978	(0.868-1.102)	0.719
rs182879770	4p15.33	14838667	G	A	0.063	0.505	0.021	0.058	1.021	(0.911-1.144)	0.720
rs62409415	4p15.33	14837841	C	A	0.137	0.682	0.013	0.035	1.013	(0.946-1.085)	0.720
rs149372560	4p15.33	14827460	A	G	0.011	0.645	-0.042	0.118	0.959	(0.761-1.208)	0.724
rs187675348	4p15.33	14835777	T	C	0.043	0.622	-0.022	0.064	0.978	(0.863-1.109)	0.731
rs10939594	4p15.33	14837288	C	A	0.156	0.716	0.011	0.033	1.011	(0.948-1.079)	0.732
rs56935118	4p15.33	14902647	A	T	0.251	0.472	0.012	0.034	1.012	(0.947-1.082)	0.732
rs112481208	4p15.33	14868217	A	G	0.085	0.463	-0.018	0.053	0.982	(0.885-1.09)	0.737
rs73797502	4p15.33	14840518	C	T	0.02	0.688	-0.029	0.086	0.971	(0.821-1.15)	0.738
rs183131701	4p15.33	14838235	A	T	0.059	0.511	-0.02	0.06	0.98	(0.871-1.103)	0.742
rs114317024	4p15.33	14869349	A	T	0.007	0.424	-0.06	0.185	0.942	(0.655-1.353)	0.745
rs11931632	4p15.33	14905055	C	T	0.252	0.471	0.011	0.034	1.011	(0.946-1.081)	0.747
rs7693913	4p15.33	14861709	C	T	0.387	0.571	0.009	0.027	1.009	(0.957-1.064)	0.749
rs76536668	4p15.33	14836183	G	C	0.042	0.623	-0.02	0.064	0.98	(0.865-1.111)	0.751
rs11725891	4p15.33	14865549	G	T	0.155	0.525	0.012	0.038	1.012	(0.939-1.09)	0.751
rs112530034	4p15.33	14840406	G	C	0.006	0.413	-0.066	0.21	0.936	(0.62-1.413)	0.753
rs1874211	4p15.33	14874204	A	G	0.264	0.502	0.01	0.032	1.01	(0.949-1.075)	0.753
rs111763110	4p15.33	14834311	G	T	0.066	0.863	0.014	0.043	1.014	(0.932-1.103)	0.755
rs73224726	4p15.33	14871341	G	A	0.052	0.47	0.02	0.066	1.02	(0.896-1.161)	0.759
rs77951517	4p15.33	14873819	C	T	0.088	0.463	-0.016	0.052	0.984	(0.889-1.09)	0.760
chr4:14903260:I	4p15.33	14903260	G	GT	0.297	0.475	0.01	0.032	1.01	(0.949-1.075)	0.764
rs55972481	4p15.33	14899125	C	T	0.007	0.403	-0.057	0.191	0.945	(0.65-1.373)	0.766
chr4:14838005:D	4p15.33	14838005	TAC	T	0.141	0.767	-0.01	0.033	0.99	(0.928-1.056)	0.769
rs11726667	4p15.33	14878059	C	G	0.23	0.502	0.01	0.034	1.01	(0.945-1.08)	0.769
rs73239324	4p15.33	14837991	G	A	0.15	0.705	0.01	0.034	1.01	(0.945-1.08)	0.772
rs55876431	4p15.33	14838966	G	T	0.259	0.604	-0.008	0.029	0.992	(0.937-1.05)	0.773
rs28437518	4p15.33	14867367	C	T	0.273	0.47	-0.01	0.033	0.99	(0.928-1.056)	0.774
rs79979046	4p15.33	14854198	C	T	0.043	0.684	-0.017	0.06	0.983	(0.874-1.106)	0.777
rs62409417	4p15.33	14837916	T	C	0.149	0.703	0.01	0.034	1.01	(0.945-1.08)	0.777
rs116467433	4p15.33	14856221	G	A	0.043	0.683	-0.017	0.06	0.983	(0.874-1.106)	0.779
rs76212733	4p15.33	14855972	T	C	0.043	0.683	-0.017	0.06	0.983	(0.874-1.106)	0.779
rs78879528	4p15.33	14856499	A	T	0.043	0.683	-0.017	0.06	0.983	(0.874-1.106)	0.779
rs114318647	4p15.33	14856723	T	C	0.043	0.683	-0.017	0.06	0.983	(0.874-1.106)	0.779
rs11722417	4p15.33	14856767	G	A	0.043	0.683	-0.017	0.06	0.983	(0.874-1.106)	0.779
rs750703	4p15.33	14903605	C	A	0.298	0.474	0.009	0.032	1.009	(0.948-1.074)	0.782
rs2315518	4p15.33	14902168	G	C	0.297	0.475	0.009	0.032	1.009	(0.948-1.074)	0.782
rs73115824	4p15.33	14899839	T	C	0.297	0.475	0.009	0.032	1.009	(0.948-1.074)	0.785
rs11930619	4p15.33	14898646	C	G	0.252	0.471	0.009	0.034	1.009	(0.944-1.079)	0.786
chr4:14841183:D	4p15.33	14841183	AT	A	0.037	0.558	0.019	0.072	1.019	(0.885-1.174)	0.787
rs4282169	4p15.33	14826640	G	A	0.068	0.78	-0.012	0.045	0.988	(0.905-1.079)	0.787
rs11936263	4p15.33	14904772	A	G	0.299	0.474	0.009	0.032	1.009	(0.948-1.074)	0.787
rs140218292	4p15.33	14834782	G	T	0.006	0.356	-0.063	0.234	0.939	(0.594-1.485)	0.789
rs13127412	4p15.33	14854862	T	C	0.014	0.765	0.026	0.099	1.026	(0.845-1.246)	0.789
rs11731253	4p15.33	14875327	G	A	0.263	0.503	0.009	0.032	1.009	(0.948-1.074)	0.790
rs11731278	4p15.33	14875371	G	C	0.263	0.503	0.009	0.032	1.009	(0.948-1.074)	0.791
rs11731167	4p15.33	14875071	G	A	0.263	0.503	0.009	0.032	1.009	(0.948-1.074)	0.791
rs28705937	4p15.33	14905261	T	A	0.299	0.474	0.008	0.032	1.008	(0.947-1.073)	0.791
rs11723192	4p15.33	14875073	C	T	0.263	0.503	0.009	0.032	1.009	(0.948-1.074)	0.791
rs1874213	4p15.33	14874138	C	G	0.263	0.503	0.009	0.032	1.009	(0.948-1.074)	0.791
rs1874212	4p15.33	14874202	T	C	0.263	0.503	0.009	0.032	1.009	(0.948-1.074)	0.791
rs7436033	4p15.33	14875558	G	A	0.263	0.503	0.009	0.032	1.009	(0.948-1.074)	0.791
rs73113959	4p15.33	14896773	C	T	0.251	0.474	0.009	0.034	1.009	(0.944-1.079)	0.791
rs4698301	4p15.33	14867462	G	T	0.273	0.47	-0.009	0.033	0.991	(0.929-1.057)	0.792
rs74437205	4p15.33	14812190	A	G	0.068	0.789	-0.012	0.045	0.988	(0.905-1.079)	0.792
rs28619320	4p15.33	14905500	T	A	0.299	0.474	0.008	0.032	1.008	(0.947-1.073)	0.794
chr4:14857168:I	4p15.33	14857168	T	TA	0.044	0.676	-0.016	0.061	0.984	(0.873-1.109)	0.794
rs7687711	4p15.33	14844813	A	G	0.007	0.428	-0.048	0.184	0.953	(0.665-1.367)	0.796
rs35617623	4p15.33	14836370	C	T	0.119	0.736	0.009	0.036	1.009	(0.94-1.083)	0.796
rs73130638	4p15.33	14837895	T	C	0.094	0.862	-0.01	0.037	0.99	(0.921-1.065)	0.797
rs184524662	4p15.33	14868131	G	T	0.064	0.448	0.016	0.061	1.016	(0.902-1.145)	0.797
rs77943874	4p15.33	14857770	A	G	0.066	0.817	0.011	0.045	1.011	(0.926-1.104)	0.800
rs28450720	4p15.33	14905322	C	A	0.299	0.474	0.008	0.032	1.008	(0.947-1.073)	0.801
rs76655420	4p15.33	14847282	C	G	0.069	0.902	0.01	0.042	1.01	(0.93-1.097)	0.802
rs73130635	4p15.33	14836495	T	C	0.094	0.861	-0.009	0.037	0.991	(0.922-1.066)	0.803
rs1985033	4p15.33	14882058	C	G	0.361	0.484	-0.007	0.03	0.993	(0.936-1.053)	0.805
rs1874210	4p15.33	14874376	C	T	0.263	0.503	0.008	0.032	1.008	(0.947-1.073)	0.806
rs140402745	4p15.33	14840936	G	A	0.03	0.613	-0.019	0.076	0.981	(0.845-1.139)	0.807
rs12505370	4p15.33	14868139	G	T	0.179	0.447	0.009	0.039	1.009	(0.935-1.089)	0.810
rs11726071	4p15.33	14872639	C	T	0.266	0.502	0.008	0.032	1.008	(0.947-1.073)	0.810
rs73113944	4p15.33	14885036	T	C	0.045	0.516	-0.016	0.067	0.984	(0.863-1.122)	0.811
rs73239311	4p15.33	14814766	T	C	0.011	0.502	0.031	0.135	1.031	(0.792-1.344)	0.816
rs115425981	4p15.33	14880919	C	T	0.019	0.717	-0.02	0.087	0.98	(0.827-1.162)	0.819
rs137942910	4p15.33	14841732	C	G	0.006	0.414	-0.047	0.21	0.954	(0.632-1.44)	0.823
rs73130658	4p15.33	14853770	C	A	0.065	0.858	0.01	0.044	1.01	(0.927-1.101)	0.826
chr4:14875094:I	4p15.33	14875094	G	GA	0.092	0.459	-0.011	0.051	0.989	(0.895-1.093)	0.828
rs10018589	4p15.33	14847678	T	A	0.02	0.698	-0.019	0.087	0.981	(0.827-1.164)	0.830
rs56058319	4p15.33	14872132	A	C	0.264	0.502	0.007	0.032	1.007	(0.946-1.072)	0.831
rs61604555	4p15.33	14838878	C	T	0.15	0.59	0.008	0.037	1.008	(0.938-1.084)	0.831
rs11944971	4p15.33	14873480	G	A	0.092	0.459	-0.011	0.051	0.989	(0.895-1.093)	0.833
rs115672803	4p15.33	14850299	A	T	0.044	0.654	-0.013	0.061	0.987	(0.876-1.112)	0.833
chr4:14868059:I	4p15.33	14868059	C	CT	0.188	0.456	0.008	0.038	1.008	(0.936-1.086)	0.835
rs78109545	4p15.33	14835503	A	G	0.041	0.627	-0.013	0.065	0.987	(0.869-1.121)	0.836
rs79579109	4p15.33	14849621	G	A	0.044	0.652	-0.012	0.061	0.988	(0.877-1.114)	0.838
rs77171738	4p15.33	14848500	A	G	0.044	0.652	-0.012	0.061	0.988	(0.877-1.114)	0.839
rs149098120	4p15.33	14841323	G	T	0.044	0.649	-0.012	0.061	0.988	(0.877-1.114)	0.843
rs1812878	4p15.33	14878820	A	G	0.26	0.503	0.006	0.033	1.006	(0.943-1.073)	0.847
rs142002797	4p15.33	14899277	T	C	0.017	0.481	-0.022	0.112	0.978	(0.785-1.218)	0.847
rs11731117	4p15.33	14872737	A	G	0.446	0.503	0.005	0.029	1.005	(0.949-1.064)	0.850
rs61066147	4p15.33	14856105	C	A	0.011	0.873	0.02	0.105	1.02	(0.83-1.253)	0.851
rs1494951	4p15.33	14892595	G	A	0.043	0.528	-0.013	0.068	0.987	(0.864-1.128)	0.853
chr4:14873596:D	4p15.33	14873596	TAATA	T	0.248	0.493	0.006	0.033	1.006	(0.943-1.073)	0.853
rs10005420	4p15.33	14896194	G	A	0.298	0.475	0.006	0.032	1.006	(0.945-1.071)	0.854
rs75722873	4p15.33	14811981	G	A	0.017	0.428	0.021	0.12	1.021	(0.807-1.292)	0.858
rs115203393	4p15.33	14875682	T	A	0.088	0.464	-0.009	0.052	0.991	(0.895-1.097)	0.860
rs79749872	4p15.33	14851432	G	C	0.011	0.868	0.018	0.105	1.018	(0.829-1.251)	0.861
rs7437094	4p15.33	14873918	A	C	0.264	0.503	0.006	0.032	1.006	(0.945-1.071)	0.862
rs11936343	4p15.33	14905014	A	G	0.301	0.475	0.006	0.032	1.006	(0.945-1.071)	0.862
rs11931562	4p15.33	14904847	C	T	0.301	0.475	0.006	0.032	1.006	(0.945-1.071)	0.862
rs9991095	4p15.33	14850836	G	A	0.127	0.821	-0.006	0.033	0.994	(0.932-1.06)	0.864
rs73130644	4p15.33	14839792	G	A	0.067	0.91	0.007	0.042	1.007	(0.927-1.093)	0.864
rs10025887	4p15.33	14850848	A	G	0.128	0.822	-0.006	0.033	0.994	(0.932-1.06)	0.865
rs28619960	4p15.33	14887657	G	A	0.253	0.472	0.006	0.034	1.006	(0.941-1.075)	0.866
rs183371600	4p15.33	14838138	C	T	0.091	0.556	0.008	0.047	1.008	(0.919-1.105)	0.869
rs180989831	4p15.33	14838500	A	G	0.205	0.553	-0.006	0.033	0.994	(0.932-1.06)	0.869
rs192217549	4p15.33	14841403	G	A	0.091	0.936	-0.006	0.036	0.994	(0.926-1.067)	0.874
rs11940575	4p15.33	14873001	A	G	0.264	0.503	0.005	0.032	1.005	(0.944-1.07)	0.878
rs10516281	4p15.33	14859224	T	A	0.126	0.609	0.006	0.039	1.006	(0.932-1.086)	0.880
rs11944768	4p15.33	14872983	G	C	0.264	0.502	0.005	0.032	1.005	(0.944-1.07)	0.881
chr4:14903220:I	4p15.33	14903220	C	CAAAG	0.296	0.475	0.005	0.032	1.005	(0.944-1.07)	0.882
rs11734932	4p15.33	14872790	G	A	0.264	0.503	0.005	0.032	1.005	(0.944-1.07)	0.883
rs11941641	4p15.33	14873287	T	C	0.264	0.503	0.005	0.032	1.005	(0.944-1.07)	0.884
rs73113964	4p15.33	14899690	A	T	0.3	0.475	0.005	0.032	1.005	(0.944-1.07)	0.884
rs11941606	4p15.33	14873154	T	C	0.264	0.503	0.005	0.032	1.005	(0.944-1.07)	0.884
rs11941717	4p15.33	14873538	T	C	0.264	0.503	0.005	0.032	1.005	(0.944-1.07)	0.884
rs11940768	4p15.33	14873522	A	G	0.264	0.503	0.005	0.032	1.005	(0.944-1.07)	0.884
chr4:14847783:I	4p15.33	14847783	A	AACAGCTCTGAGGAGGG	0.077	0.927	0.006	0.039	1.006	(0.932-1.086)	0.884
rs113293210	4p15.33	14846376	G	A	0.006	0.415	-0.028	0.204	0.972	(0.652-1.45)	0.891
rs11940615	4p15.33	14873110	A	G	0.264	0.502	0.004	0.032	1.004	(0.943-1.069)	0.891
rs11940765	4p15.33	14873514	A	T	0.264	0.502	0.004	0.032	1.004	(0.943-1.069)	0.894
rs1494941	4p15.33	14896947	T	G	0.302	0.475	0.004	0.032	1.004	(0.943-1.069)	0.896
rs11938154	4p15.33	14849961	C	T	0.132	0.835	-0.004	0.032	0.996	(0.935-1.06)	0.898
rs76490798	4p15.33	14857081	A	G	0.014	0.763	0.013	0.1	1.013	(0.833-1.232)	0.900
rs186299928	4p15.33	14838199	A	C	0.064	0.512	-0.007	0.057	0.993	(0.888-1.11)	0.902
rs73239321	4p15.33	14837123	C	G	0.108	0.696	-0.005	0.039	0.995	(0.922-1.074)	0.903
rs73224718	4p15.33	14864430	T	C	0.031	0.498	-0.01	0.083	0.99	(0.841-1.165)	0.903
rs4698297	4p15.33	14854246	C	A	0.126	0.839	-0.004	0.033	0.996	(0.934-1.063)	0.906
rs35443485	4p15.33	14841375	C	T	0.057	0.642	0.006	0.054	1.006	(0.905-1.118)	0.909
chr4:14887467:I	4p15.33	14887467	C	CA	0.026	0.488	0.01	0.091	1.01	(0.845-1.207)	0.910
rs11946951	4p15.33	14849763	G	A	0.087	0.926	0.004	0.037	1.004	(0.934-1.08)	0.912
chr4:14815491:D	4p15.33	14815491	AAAAT	A	0.124	0.638	-0.004	0.038	0.996	(0.925-1.073)	0.913
rs138399303	4p15.33	14822786	G	A	0.006	0.463	0.021	0.198	1.021	(0.693-1.505)	0.914
rs1389998	4p15.33	14898128	C	T	0.3	0.475	0.003	0.032	1.003	(0.942-1.068)	0.914
rs1494943	4p15.33	14898881	T	C	0.3	0.475	0.003	0.032	1.003	(0.942-1.068)	0.915
rs11947035	4p15.33	14849999	G	A	0.132	0.834	-0.003	0.032	0.997	(0.936-1.062)	0.915
rs11943038	4p15.33	14904620	T	C	0.301	0.47	0.003	0.032	1.003	(0.942-1.068)	0.916
rs191474532	4p15.33	14838289	T	A	0.072	0.597	0.005	0.05	1.005	(0.911-1.108)	0.917
rs57764184	4p15.33	14891702	T	C	0.046	0.507	-0.007	0.067	0.993	(0.871-1.132)	0.921
rs41464049	4p15.33	14897734	T	C	0.046	0.507	-0.007	0.067	0.993	(0.871-1.132)	0.921
rs73115833	4p15.33	14906035	T	C	0.308	0.474	0.003	0.032	1.003	(0.942-1.068)	0.922
rs73113961	4p15.33	14899631	C	T	0.046	0.507	-0.006	0.067	0.994	(0.872-1.134)	0.923
rs11943837	4p15.33	14850047	T	C	0.076	0.938	0.004	0.039	1.004	(0.93-1.084)	0.928
rs16891117	4p15.33	14866897	G	A	0.178	0.461	-0.004	0.039	0.996	(0.923-1.075)	0.928
rs2315334	4p15.33	14857129	C	A	0.076	0.859	-0.004	0.041	0.996	(0.919-1.079)	0.928
rs59605665	4p15.33	14848473	T	G	0.013	0.809	0.009	0.1	1.009	(0.829-1.228)	0.929
rs73130646	4p15.33	14843783	G	C	0.088	0.952	-0.003	0.036	0.997	(0.929-1.07)	0.931
chr4:14903216:I	4p15.33	14903216	A	AAAAC	0.294	0.475	0.003	0.032	1.003	(0.942-1.068)	0.931
rs59926155	4p15.33	14842547	C	T	0.088	0.951	-0.003	0.036	0.997	(0.929-1.07)	0.932
rs77247326	4p15.33	14817077	G	A	0.018	0.549	-0.009	0.103	0.991	(0.81-1.213)	0.932
rs11930879	4p15.33	14890632	A	G	0.298	0.475	-0.003	0.032	0.997	(0.936-1.062)	0.932
rs11728734	4p15.33	14870651	A	C	0.091	0.462	-0.004	0.051	0.996	(0.901-1.101)	0.934
rs11729815	4p15.33	14871178	T	A	0.085	0.47	-0.004	0.053	0.996	(0.898-1.105)	0.935
rs62409422	4p15.33	14846715	G	A	0.142	0.532	-0.003	0.04	0.997	(0.922-1.078)	0.936
rs28693052	4p15.33	14872657	C	T	0.182	0.459	0.003	0.038	1.003	(0.931-1.081)	0.937
rs28367068	4p15.33	14873450	T	C	0.182	0.459	0.003	0.039	1.003	(0.929-1.083)	0.938
chr4:14857163:I	4p15.33	14857163	T	TC	0.075	0.848	-0.003	0.041	0.997	(0.92-1.08)	0.939
rs73115826	4p15.33	14904821	A	G	0.047	0.506	-0.005	0.066	0.995	(0.874-1.132)	0.943
rs6849965	4p15.33	14873849	C	T	0.266	0.503	0.002	0.032	1.002	(0.941-1.067)	0.946
rs183914198	4p15.33	14839063	A	C	0.044	0.628	-0.004	0.063	0.996	(0.88-1.127)	0.946
rs4406012	4p15.33	14851394	G	C	0.083	0.9	0.003	0.038	1.003	(0.931-1.081)	0.946
rs923984	4p15.33	14874051	G	A	0.182	0.459	0.003	0.038	1.003	(0.931-1.081)	0.948
rs16891098	4p15.33	14858993	C	G	0.065	0.496	-0.003	0.058	0.997	(0.89-1.117)	0.953
rs112357902	4p15.33	14858792	A	T	0.006	0.417	0.011	0.205	1.011	(0.677-1.511)	0.956
chr4:14875293:D	4p15.33	14875293	TG	T	0.182	0.459	0.002	0.038	1.002	(0.93-1.079)	0.958
chr4:14868599:I	4p15.33	14868599	A	ACGG	0.183	0.456	0.002	0.039	1.002	(0.928-1.082)	0.958
rs28689618	4p15.33	14860051	C	T	0.369	0.578	0.001	0.028	1.001	(0.948-1.057)	0.958
rs67190065	4p15.33	14869815	C	T	0.183	0.456	-0.002	0.039	0.998	(0.925-1.077)	0.959
rs62409424	4p15.33	14846739	A	G	0.078	0.498	0.003	0.053	1.003	(0.904-1.113)	0.960
rs116067906	4p15.33	14819927	C	A	0.01	0.619	0.007	0.132	1.007	(0.777-1.304)	0.960
rs112130701	4p15.33	14868138	A	C	0.085	0.45	-0.003	0.054	0.997	(0.897-1.108)	0.961
rs148325481	4p15.33	14823353	G	A	0.006	0.475	0.009	0.197	1.009	(0.686-1.485)	0.963
rs73113956	4p15.33	14893269	C	G	0.249	0.473	-0.002	0.034	0.998	(0.934-1.067)	0.963
rs66765996	4p15.33	14868348	A	G	0.184	0.457	0.002	0.038	1.002	(0.93-1.079)	0.964
rs147610235	4p15.33	14821063	A	C	0.009	0.457	-0.007	0.159	0.993	(0.727-1.356)	0.965
rs67079762	4p15.33	14876728	G	A	0.18	0.458	0.002	0.039	1.002	(0.928-1.082)	0.965
rs59604684	4p15.33	14859816	T	C	0.102	0.664	-0.002	0.041	0.998	(0.921-1.082)	0.966
rs923983	4p15.33	14874104	C	T	0.182	0.459	0.002	0.038	1.002	(0.93-1.079)	0.968
rs57401746	4p15.33	14852964	C	G	0.083	0.904	0.001	0.038	1.001	(0.929-1.078)	0.968
rs4698303	4p15.33	14872811	T	C	0.183	0.457	0.002	0.038	1.002	(0.93-1.079)	0.968
rs141412633	4p15.33	14887253	G	A	0.02	0.6	0.003	0.093	1.003	(0.836-1.204)	0.971
rs186578169	4p15.33	14838464	T	G	0.029	0.481	0.003	0.087	1.003	(0.846-1.189)	0.974
rs146418460	4p15.33	14859310	C	A	0.007	0.575	-0.005	0.164	0.995	(0.721-1.372)	0.975
rs79151418	4p15.33	14865611	G	T	0.022	0.671	-0.002	0.083	0.998	(0.848-1.174)	0.978
rs56300322	4p15.33	14853500	T	C	0.072	0.901	0.001	0.041	1.001	(0.924-1.085)	0.979
rs28758367	4p15.33	14862050	T	C	0.211	0.571	-0.001	0.033	0.999	(0.936-1.066)	0.979
rs182290154	4p15.33	14878543	C	T	0.007	0.476	-0.004	0.182	0.996	(0.697-1.423)	0.983
rs28524915	4p15.33	14868897	C	T	0.184	0.456	-0.001	0.038	0.999	(0.927-1.076)	0.985
rs28670991	4p15.33	14868943	C	T	0.184	0.456	-0.001	0.038	0.999	(0.927-1.076)	0.985
rs10028504	4p15.33	14836137	C	T	0.008	0.422	0.003	0.171	1.003	(0.717-1.402)	0.986
rs78051805	4p15.33	14864543	C	T	0.024	0.409	-0.002	0.105	0.998	(0.812-1.226)	0.986
rs61489111	4p15.33	14852823	A	G	0.072	0.905	-0.001	0.041	0.999	(0.922-1.083)	0.987
rs28597787	4p15.33	14871034	G	A	0.183	0.458	-0.001	0.039	0.999	(0.925-1.078)	0.988
rs76381084	4p15.33	14811204	C	A	0.008	0.394	0.002	0.183	1.002	(0.7-1.434)	0.993
chr4:14857351:I	4p15.33	14857351	C	CA	0.077	0.848	0	0.041	1	(0.923-1.084)	0.996
rs73113947	4p15.33	14887471	C	A	0.297	0.475	0	0.032	1	(0.939-1.065)	0.996
rs57244146	4p15.33	14853077	G	A	0.083	0.904	0	0.038	1	(0.928-1.077)	0.998
rs10025001	4p15.33	14879929	T	C	0.398	0.502	0	0.029	1	(0.945-1.058)	0.999
rs146416943	4p15.33	14831002	T	G	0.006	0.463	0	0.188	1	(0.692-1.446)	0.999
rs10028168	4p15.33	14895940	C	T	0.3	0.475	0	0.032	1	(0.939-1.065)	0.999
rs1494952	4p15.33	14892354	C	T	0.295	0.475	0	0.032	1	(0.939-1.065)	1.000
rs1494942	4p15.33	14898233	T	C	0.048	0.524	0	0.065	1	(0.88-1.136)	1.000
		NA			NA	NA	NA	NA	NA	(NA-NA)
rs115413354	5q14.1	79912849	T	A	0.553	0.72	0.066	0.024	1.068	(1.019-1.12)	0.006
rs863901	5q14.1	79912540	A	G	0.343	1	0.057	0.021	1.059	(1.016-1.103)	0.007
rs836788	5q14.1	79912044	C	T	0.343	1	0.056	0.021	1.058	(1.015-1.102)	0.008
rs425463	5q14.1	79901952	G	A	0.34	1	0.053	0.021	1.054	(1.012-1.099)	0.011
rs431443	5q14.1	79900281	C	T	0.341	0.989	0.054	0.021	1.055	(1.013-1.1)	0.011
rs442767	5q14.1	79951496	G	T	0.336	0.999	-0.054	0.021	0.947	(0.909-0.987)	0.012
rs1105524	5q14.1	79950512	A	G	0.663	0.998	0.054	0.021	1.055	(1.013-1.1)	0.012
rs384925	5q14.1	79914633	A	G	0.664	0.999	0.053	0.021	1.054	(1.012-1.099)	0.012
rs861365	5q14.1	79915807	A	C	0.665	0.999	0.053	0.021	1.054	(1.012-1.099)	0.013
rs6453521	5q14.1	79852478	T	G	0.048	0.771	-0.133	0.053	0.875	(0.789-0.971)	0.013
rs525054	5q14.1	79932099	G	A	0.664	0.999	0.053	0.021	1.054	(1.012-1.099)	0.013
rs372069	5q14.1	79931007	C	G	0.664	0.999	0.053	0.021	1.054	(1.012-1.099)	0.013
rs7711441	5q14.1	79862202	A	T	0.065	0.835	-0.11	0.045	0.896	(0.82-0.978)	0.014
chr5:79942316:I	5q14.1	79942316	T	TCA	0.663	0.998	0.052	0.021	1.053	(1.011-1.098)	0.014
rs443611	5q14.1	79919170	C	T	0.655	0.999	0.052	0.021	1.053	(1.011-1.098)	0.015
rs1643665	5q14.1	79910843	G	A	0.664	0.99	0.052	0.021	1.053	(1.011-1.098)	0.016
rs2434329	5q14.1	79944196	A	T	0.666	0.979	0.051	0.022	1.052	(1.008-1.099)	0.017
rs140344224	5q14.1	79936347	C	G	0.015	0.553	-0.265	0.111	0.767	(0.617-0.954)	0.017
rs7728534	5q14.1	79862200	G	A	0.064	0.834	-0.106	0.045	0.899	(0.823-0.982)	0.018
rs2115014	5q14.1	79899922	C	G	0.66	0.984	0.051	0.021	1.052	(1.01-1.097)	0.018
rs10073069	5q14.1	79860587	C	A	0.066	0.831	-0.103	0.044	0.902	(0.828-0.983)	0.020
rs10058711	5q14.1	79893653	T	C	0.291	0.888	0.054	0.024	1.055	(1.007-1.106)	0.022
rs188099209	5q14.1	79932406	C	T	0.006	0.583	0.4	0.181	1.492	(1.046-2.127)	0.027
rs56369115	5q14.1	79908611	A	G	0.229	0.637	0.063	0.03	1.065	(1.004-1.13)	0.034
rs420522	5q14.1	79902336	G	A	0.246	0.975	0.049	0.024	1.05	(1.002-1.101)	0.037
chr5:79942318:I	5q14.1	79942318	A	ACG	0.646	0.942	0.045	0.022	1.046	(1.002-1.092)	0.038
chr5:79896559:I	5q14.1	79896559	T	TTATA	0.643	0.813	0.048	0.023	1.049	(1.003-1.098)	0.039
chr5:79912885:D	5q14.1	79912885	TATATATATATA	T	0.627	0.765	0.049	0.024	1.05	(1.002-1.101)	0.039
rs1650697	5q14.1	79950781	A	G	0.751	1	-0.047	0.023	0.954	(0.912-0.998)	0.041
rs245105	5q14.1	79928518	T	C	0.249	0.999	0.047	0.023	1.048	(1.002-1.096)	0.042
rs701383	5q14.1	79913275	G	A	0.249	0.996	0.047	0.023	1.048	(1.002-1.096)	0.043
rs12517451	5q14.1	79920073	C	T	0.25	1	0.047	0.023	1.048	(1.002-1.096)	0.043
rs4703814	5q14.1	79893715	A	G	0.289	1	-0.045	0.022	0.956	(0.916-0.998)	0.045
rs11741562	5q14.1	79893662	T	G	0.287	0.976	-0.045	0.023	0.956	(0.914-1)	0.046
chr5:79912887:D	5q14.1	79912887	TATATATATA	T	0.671	0.785	0.048	0.024	1.049	(1.001-1.1)	0.048
rs187262	5q14.1	79855876	T	C	0.77	0.91	-0.05	0.025	0.951	(0.906-0.999)	0.048
rs245100	5q14.1	79933093	A	G	0.253	0.985	0.046	0.023	1.047	(1.001-1.095)	0.048
rs192906457	5q14.1	79908601	A	G	0.114	0.715	0.074	0.037	1.077	(1.001-1.158)	0.049
rs173441	5q14.1	79893519	G	A	0.519	0.879	-0.042	0.021	0.959	(0.92-0.999)	0.050
chr5:79912895:D	5q14.1	79912895	TA	T	0.65	0.828	0.044	0.023	1.045	(0.999-1.093)	0.055
rs140302260	5q14.1	79946084	C	G	0.053	0.999	-0.085	0.045	0.919	(0.841-1.003)	0.058
rs150977859	5q14.1	79946787	C	T	0.053	0.999	-0.085	0.045	0.919	(0.841-1.003)	0.058
rs35709834	5q14.1	79942229	G	C	0.053	0.999	-0.085	0.045	0.919	(0.841-1.003)	0.059
rs72765560	5q14.1	79943686	C	T	0.053	0.999	-0.085	0.045	0.919	(0.841-1.003)	0.059
rs72765561	5q14.1	79944090	T	C	0.053	0.999	-0.085	0.045	0.919	(0.841-1.003)	0.059
rs146683450	5q14.1	79918052	G	A	0.054	0.998	-0.084	0.045	0.919	(0.842-1.004)	0.061
rs149907678	5q14.1	79932317	C	T	0.054	0.999	-0.084	0.045	0.919	(0.842-1.004)	0.061
rs72765555	5q14.1	79935610	A	G	0.054	0.999	-0.084	0.045	0.919	(0.842-1.004)	0.061
rs72765552	5q14.1	79928692	A	G	0.054	0.999	-0.084	0.045	0.919	(0.842-1.004)	0.061
rs56212706	5q14.1	79927857	G	A	0.054	0.999	-0.084	0.045	0.919	(0.842-1.004)	0.061
rs55896641	5q14.1	79928011	C	T	0.054	0.999	-0.084	0.045	0.919	(0.842-1.004)	0.061
rs140111339	5q14.1	79923385	A	C	0.054	0.997	-0.083	0.045	0.92	(0.843-1.005)	0.064
rs34235624	5q14.1	79914774	A	G	0.128	0.962	0.056	0.03	1.058	(0.997-1.122)	0.065
rs6151599	5q14.1	79951032	A	G	0.082	1	0.067	0.037	1.069	(0.994-1.15)	0.065
rs72765549	5q14.1	79921117	T	C	0.054	0.997	-0.082	0.045	0.921	(0.843-1.006)	0.067
rs80319290	5q14.1	79921566	C	T	0.053	0.999	-0.081	0.045	0.922	(0.844-1.007)	0.069
rs10052238	5q14.1	79940311	C	T	0.082	1	0.066	0.037	1.068	(0.994-1.149)	0.069
rs10078190	5q14.1	79938822	C	T	0.082	1	0.066	0.037	1.068	(0.994-1.149)	0.069
rs10054574	5q14.1	79927010	A	C	0.082	1	0.066	0.037	1.068	(0.994-1.149)	0.069
rs10474631	5q14.1	79935899	C	T	0.082	1	0.066	0.037	1.068	(0.994-1.149)	0.069
rs72765548	5q14.1	79914619	G	A	0.053	0.997	-0.081	0.045	0.922	(0.844-1.007)	0.070
rs56270084	5q14.1	79921949	C	T	0.082	0.999	0.066	0.037	1.068	(0.994-1.149)	0.071
rs67695365	5q14.1	79919252	T	A	0.082	0.999	0.066	0.037	1.068	(0.994-1.149)	0.071
[truncated: 1,214 more rows]

## Sheet: BRCA2
Online Resource 6b. Associations for imputed and genotyped SNPs in the BRCA2 mutation carriers loci (p<10-2) for overall breast cancer risk.
SNP	Locus	Position	Reference_Allele	Effect_Allele	EAF	r2	BC_logHR	BC_SE	BC_HR	95% CI	P-value
chr6:28226644:I	6p22.1	28226644	T	TAACAAG	0.039	0.945	0.256	0.077	1.292	(1.111-1.502)	0.001
chr6:28226650:I	6p22.1	28226650	G	GAACAA	0.039	0.945	0.25	0.078	1.284	(1.102-1.496)	0.001
rs62401443	6p22.1	28214646	T	C	0.018	0.468	-0.486	0.16	0.615	(0.45-0.842)	0.002
rs9468325	6p22.1	28250985	C	T	0.041	0.965	0.22	0.074	1.246	(1.078-1.441)	0.003
rs9468321	6p22.1	28224525	A	G	0.044	0.999	0.205	0.071	1.228	(1.068-1.411)	0.004
rs9461446	6p22.1	28227633	C	T	0.044	1	0.205	0.071	1.228	(1.068-1.411)	0.004
rs9468322	6p22.1	28231243	G	A	0.044	1	0.205	0.071	1.228	(1.068-1.411)	0.004
rs1778507	6p22.1	28230717	T	C	0.954	1	-0.189	0.07	0.828	(0.722-0.95)	0.007
rs9295767	6p22.1	28182450	G	A	0.04	0.985	0.194	0.075	1.214	(1.048-1.406)	0.01
rs7740487	6p22.1	28216486	C	G	0.126	0.995	0.11	0.044	1.116	(1.024-1.217)	0.013
rs68141011	6p22.1	28217797	G	T	0.127	0.999	0.108	0.044	1.114	(1.022-1.214)	0.014
rs13200462	6p22.1	28218199	A	C	0.127	0.999	0.108	0.044	1.114	(1.022-1.214)	0.014
rs6901575	6p22.1	28250984	G	A	0.126	0.988	0.108	0.044	1.114	(1.022-1.214)	0.015
rs6920512	6p22.1	28247221	G	A	0.915	0.873	-0.131	0.054	0.877	(0.789-0.975)	0.015
rs1419183	6p22.1	28242794	A	C	0.129	0.998	0.106	0.044	1.112	(1.02-1.212)	0.015
rs2743555	6p22.1	28241081	G	A	0.129	0.998	0.106	0.044	1.112	(1.02-1.212)	0.016
rs11965538	6p22.1	28239915	G	A	0.129	0.998	0.105	0.044	1.111	(1.019-1.211)	0.016
rs9986596	6p22.1	28219661	G	A	0.127	0.996	0.106	0.044	1.112	(1.02-1.212)	0.016
rs11962305	6p22.1	28199937	G	C	0.164	0.982	0.095	0.04	1.1	(1.017-1.189)	0.017
rs2799079	6p22.1	28235176	A	C	0.129	0.999	0.104	0.044	1.11	(1.018-1.21)	0.017
rs1778508	6p22.1	28229881	C	T	0.872	0.999	-0.104	0.044	0.901	(0.827-0.982)	0.017
rs2799077	6p22.1	28234597	C	T	0.129	0.999	0.104	0.044	1.11	(1.018-1.21)	0.017
chr6:28229461:I	6p22.1	28229461	G	GA	0.871	0.999	-0.104	0.044	0.901	(0.827-0.982)	0.017
rs1778511	6p22.1	28229411	G	A	0.871	0.999	-0.104	0.044	0.901	(0.827-0.982)	0.017
rs1679709	6p22.1	28228342	A	G	0.871	0.999	-0.104	0.044	0.901	(0.827-0.982)	0.017
rs1679732	6p22.1	28221264	G	A	0.871	0.999	-0.104	0.044	0.901	(0.827-0.982)	0.017
rs10456362	6p22.1	28221816	A	G	0.874	1	-0.102	0.044	0.903	(0.828-0.984)	0.02
chr6:28211441:D	6p22.1	28211441	TC	T	0.159	0.976	0.094	0.04	1.099	(1.016-1.188)	0.021
chr6:28209398:I	6p22.1	28209398	T	TATC	0.163	0.983	0.092	0.04	1.096	(1.014-1.186)	0.022
rs9393910	6p22.1	28208192	C	G	0.162	0.985	0.092	0.04	1.096	(1.014-1.186)	0.022
rs9368563	6p22.1	28208558	A	G	0.162	0.985	0.092	0.04	1.096	(1.014-1.186)	0.022
rs9357067	6p22.1	28210293	C	G	0.162	0.985	0.092	0.04	1.096	(1.014-1.186)	0.022
rs9295768	6p22.1	28209102	G	A	0.162	0.985	0.092	0.04	1.096	(1.014-1.186)	0.022
rs9468318	6p22.1	28209531	T	A	0.162	0.985	0.092	0.04	1.096	(1.014-1.186)	0.022
rs967005	6p22.1	28210688	C	T	0.162	0.985	0.092	0.04	1.096	(1.014-1.186)	0.022
rs9393909	6p22.1	28207200	C	T	0.162	0.985	0.091	0.04	1.095	(1.013-1.185)	0.023
rs2299029	6p22.1	28198831	G	A	0.162	0.984	0.091	0.04	1.095	(1.013-1.185)	0.024
rs9468317	6p22.1	28198456	T	C	0.162	0.984	0.091	0.04	1.095	(1.013-1.185)	0.024
rs9366718	6p22.1	28205502	A	T	0.163	0.985	0.089	0.04	1.093	(1.011-1.182)	0.026
rs9366717	6p22.1	28191057	C	T	0.113	0.991	0.102	0.046	1.107	(1.012-1.212)	0.027
rs9393908	6p22.1	28190830	T	A	0.113	0.991	0.102	0.046	1.107	(1.012-1.212)	0.027
rs11967137	6p22.1	28199764	A	G	0.163	0.984	0.088	0.04	1.092	(1.01-1.181)	0.027
rs78655767	6p22.1	28216846	A	T	0.008	0.988	0.36	0.166	1.433	(1.035-1.984)	0.03
rs114927617	6p22.1	28247247	G	A	0.008	0.985	0.359	0.165	1.432	(1.036-1.979)	0.03
rs9380069	6p22.1	28203300	A	G	0.115	0.988	0.099	0.046	1.104	(1.009-1.208)	0.03
rs34787248	6p22.1	28197886	C	T	0.161	0.98	0.086	0.04	1.09	(1.008-1.179)	0.032
rs1736904	6p22.1	28219270	G	A	0.186	0.998	0.08	0.038	1.083	(1.006-1.167)	0.034
chr6:28183242:I	6p22.1	28183242	T	TTCTGAGGAA	0.113	0.984	0.098	0.046	1.103	(1.008-1.207)	0.035
rs114078789	6p22.1	28274695	G	T	0.011	0.753	0.336	0.162	1.399	(1.019-1.922)	0.038
rs9461443	6p22.1	28194629	A	T	0.211	0.982	0.069	0.036	1.071	(0.998-1.15)	0.058
rs34477097	6p22.1	28197186	C	T	0.212	0.983	0.068	0.036	1.07	(0.997-1.149)	0.061
rs17720293	6p22.1	28214698	C	T	0.091	0.997	0.089	0.051	1.093	(0.989-1.208)	0.079
rs183851121	6p22.1	28203214	C	T	0.009	0.676	-0.324	0.185	0.723	(0.503-1.039)	0.08
rs6938961	6p22.1	28280297	G	A	0.061	0.618	0.134	0.077	1.143	(0.983-1.33)	0.081
rs61127718	6p22.1	28234423	T	C	0.026	0.996	0.154	0.092	1.166	(0.974-1.397)	0.093
rs146712830	6p22.1	28264884	C	T	0.007	0.429	-0.46	0.275	0.631	(0.368-1.082)	0.094
chr6:28232300:D	6p22.1	28232300	AG	A	0.026	0.996	0.153	0.092	1.165	(0.973-1.396)	0.095
rs853694	6p22.1	28279100	A	T	0.138	0.997	0.068	0.042	1.07	(0.986-1.162)	0.104
rs1936365	6p22.1	28268452	G	C	0.138	0.996	0.068	0.042	1.07	(0.986-1.162)	0.107
rs115837789	6p22.1	28266575	G	A	0.012	0.974	-0.216	0.136	0.806	(0.617-1.052)	0.112
rs6905391	6p22.1	28262686	G	A	0.138	0.993	0.065	0.042	1.067	(0.983-1.159)	0.123
chr6:28217822:I	6p22.1	28217822	A	AT	0.014	0.532	0.26	0.169	1.297	(0.931-1.806)	0.125
chr6:28266321:I	6p22.1	28266321	G	GA	0.01	0.325	0.389	0.263	1.476	(0.881-2.471)	0.14
rs4713158	6p22.1	28277771	C	A	0.332	0.996	0.045	0.031	1.046	(0.984-1.112)	0.148
rs9468333	6p22.1	28271198	C	T	0.332	0.996	0.045	0.031	1.046	(0.984-1.112)	0.149
rs1997660	6p22.1	28269663	A	G	0.333	0.996	0.045	0.031	1.046	(0.984-1.112)	0.15
rs9461449	6p22.1	28270064	T	A	0.053	0.993	0.093	0.065	1.097	(0.966-1.247)	0.151
chr6:28265398:D	6p22.1	28265398	CA	C	0.053	0.992	0.093	0.065	1.097	(0.966-1.247)	0.152
rs75617846	6p22.1	28181994	A	G	0.026	0.979	0.132	0.092	1.141	(0.953-1.367)	0.153
rs9461448	6p22.1	28263721	T	G	0.053	0.991	0.092	0.065	1.096	(0.965-1.245)	0.153
rs11755032	6p22.1	28255277	C	T	0.053	0.989	0.091	0.065	1.095	(0.964-1.244)	0.159
rs1150711	6p22.1	28208535	T	C	0.321	0.978	0.044	0.032	1.045	(0.981-1.113)	0.161
rs1339899	6p22.1	28271602	T	C	0.054	0.987	0.09	0.065	1.094	(0.963-1.243)	0.165
rs2743554	6p22.1	28265640	A	G	0.063	0.992	0.082	0.06	1.085	(0.965-1.221)	0.171
rs146249461	6p22.1	28270517	T	C	0.018	0.984	0.151	0.112	1.163	(0.934-1.448)	0.175
chr6:28214160:D	6p22.1	28214160	AACTGGTG	A	0.328	0.956	0.042	0.032	1.043	(0.979-1.11)	0.187
rs2799081	6p22.1	28270584	T	C	0.285	0.995	0.043	0.032	1.044	(0.98-1.112)	0.187
rs112991339	6p22.1	28197826	A	G	0.01	0.874	0.206	0.157	1.229	(0.903-1.671)	0.19
chr6:28268484:D	6p22.1	28268484	CT	C	0.055	0.993	0.083	0.063	1.087	(0.96-1.229)	0.191
chr6:28279890:D	6p22.1	28279890	CT	C	0.054	0.99	0.082	0.064	1.085	(0.957-1.231)	0.198
rs1233713	6p22.1	28198281	A	G	0.389	0.986	0.039	0.03	1.04	(0.98-1.103)	0.201
rs2142730	6p22.1	28266149	T	C	0.389	0.995	0.038	0.03	1.039	(0.979-1.102)	0.201
rs1150709	6p22.1	28207363	T	C	0.383	0.981	0.039	0.03	1.04	(0.98-1.103)	0.204
rs1150716	6p22.1	28262698	T	G	0.39	0.994	0.037	0.03	1.038	(0.978-1.101)	0.211
chr6:28276551:D	6p22.1	28276551	GGGTTT	G	0.054	0.984	0.08	0.065	1.083	(0.954-1.23)	0.22
rs1736891	6p22.1	28187101	C	A	0.386	0.981	0.036	0.03	1.037	(0.977-1.099)	0.239
rs144130050	6p22.1	28264188	T	C	0.014	0.625	0.186	0.158	1.204	(0.884-1.642)	0.239
rs7206	6p22.1	28201138	A	G	0.385	0.986	0.035	0.03	1.036	(0.976-1.098)	0.243
rs1150707	6p22.1	28197605	C	T	0.385	0.986	0.035	0.03	1.036	(0.976-1.098)	0.243
rs180721648	6p22.1	28276686	G	A	0.009	0.978	-0.177	0.152	0.838	(0.622-1.129)	0.245
rs1150718	6p22.1	28256947	C	A	0.361	0.996	0.035	0.03	1.036	(0.976-1.098)	0.251
rs147128885	6p22.1	28279565	G	A	0.009	0.976	-0.172	0.15	0.842	(0.628-1.13)	0.252
rs1150705	6p22.1	28193786	T	G	0.373	0.983	0.034	0.03	1.035	(0.976-1.097)	0.255
rs1233660	6p22.1	28260249	T	A	0.36	0.993	0.035	0.031	1.036	(0.975-1.1)	0.256
rs1778484	6p22.1	28240798	A	G	0.361	0.999	0.034	0.03	1.035	(0.976-1.097)	0.261
rs1150726	6p22.1	28243042	G	A	0.361	1	0.034	0.03	1.035	(0.976-1.097)	0.267
rs11752073	6p22.1	28204793	G	T	0.117	0.973	-0.051	0.046	0.95	(0.868-1.04)	0.27
rs79615215	6p22.1	28188774	G	A	0.117	0.965	-0.051	0.046	0.95	(0.868-1.04)	0.272
chr6:28204558:I	6p22.1	28204558	A	AG	0.365	0.983	0.033	0.03	1.034	(0.975-1.096)	0.273
rs1150721	6p22.1	28255040	G	C	0.36	0.996	0.033	0.03	1.034	(0.975-1.096)	0.278
rs1150724	6p22.1	28250236	C	T	0.361	1	0.033	0.03	1.034	(0.975-1.096)	0.28
rs6917759	6p22.1	28201364	A	G	0.117	0.973	-0.05	0.046	0.951	(0.869-1.041)	0.281
rs76542212	6p22.1	28198122	C	T	0.056	0.485	0.094	0.089	1.099	(0.923-1.308)	0.287
rs73742521	6p22.1	28280275	G	C	0.047	0.945	0.073	0.07	1.076	(0.938-1.234)	0.299
rs112863641	6p22.1	28217931	C	T	0.104	0.983	-0.049	0.048	0.952	(0.867-1.046)	0.303
rs73742520	6p22.1	28280273	G	C	0.047	0.947	0.072	0.07	1.075	(0.937-1.233)	0.306
rs13408	6p22.1	28212748	G	A	0.418	0.991	0.03	0.03	1.03	(0.972-1.093)	0.309
rs75911870	6p22.1	28264053	A	G	0.011	0.933	0.149	0.147	1.161	(0.87-1.548)	0.311
rs1736895	6p22.1	28219826	G	A	0.418	0.999	0.03	0.03	1.03	(0.972-1.093)	0.316
rs1531681	6p22.1	28226878	G	A	0.582	1	-0.029	0.03	0.971	(0.916-1.03)	0.323
rs12214383	6p22.1	28223731	T	C	0.582	1	-0.029	0.03	0.971	(0.916-1.03)	0.323
rs2394049	6p22.1	28239681	A	G	0.418	0.999	0.029	0.03	1.029	(0.971-1.092)	0.325
rs1778483	6p22.1	28240991	T	G	0.287	0.936	0.032	0.033	1.033	(0.968-1.102)	0.33
chr6:28218324:I	6p22.1	28218324	C	CAAAG	0.353	0.978	0.03	0.031	1.03	(0.97-1.095)	0.33
rs7741443	6p22.1	28241263	A	T	0.17	0.962	-0.038	0.04	0.963	(0.89-1.041)	0.335
rs150494015	6p22.1	28267557	A	G	0.015	0.473	0.166	0.174	1.181	(0.839-1.66)	0.34
rs993619	6p22.1	28189663	G	C	0.15	0.957	-0.039	0.042	0.962	(0.886-1.044)	0.349
rs150528836	6p22.1	28196083	T	C	0.013	0.888	0.126	0.134	1.134	(0.872-1.475)	0.349
rs34024998	6p22.1	28197752	G	C	0.358	0.972	0.028	0.031	1.028	(0.968-1.093)	0.362
chr6:28240989:D	6p22.1	28240989	GT	G	0.3	0.962	0.028	0.032	1.028	(0.966-1.095)	0.382
chr6:28224947:D	6p22.1	28224947	TTGTTA	T	0.175	0.998	-0.034	0.039	0.967	(0.895-1.043)	0.384
rs12197427	6p22.1	28195521	A	G	0.022	0.51	-0.121	0.14	0.886	(0.673-1.166)	0.389
rs1778482	6p22.1	28240992	G	C	0.286	0.935	0.029	0.033	1.029	(0.965-1.098)	0.39
rs114124258	6p22.1	28273827	C	T	0.049	0.964	-0.059	0.068	0.943	(0.825-1.077)	0.391
rs34396849	6p22.1	28250955	A	C	0.075	0.999	0.047	0.055	1.048	(0.941-1.167)	0.398
rs34878803	6p22.1	28250179	T	C	0.075	0.999	0.047	0.055	1.048	(0.941-1.167)	0.399
rs13211507	6p22.1	28257377	T	C	0.075	1	0.047	0.055	1.048	(0.941-1.167)	0.399
rs34691223	6p22.1	28258208	C	A	0.075	1	0.047	0.055	1.048	(0.941-1.167)	0.399
rs34950484	6p22.1	28278688	G	A	0.075	0.999	0.047	0.055	1.048	(0.941-1.167)	0.401
rs3800326	6p22.1	28264717	C	T	0.028	0.979	0.073	0.088	1.076	(0.905-1.278)	0.407
chr6:28277346:D	6p22.1	28277346	AT	A	0.075	0.999	0.046	0.055	1.047	(0.94-1.166)	0.411
rs183836968	6p22.1	28261933	A	G	0.009	0.884	0.134	0.164	1.143	(0.829-1.577)	0.414
rs182022782	6p22.1	28214427	C	A	0.025	0.748	0.086	0.107	1.09	(0.884-1.344)	0.422
rs67998226	6p22.1	28238059	T	C	0.075	0.999	0.044	0.055	1.045	(0.938-1.164)	0.424
chr6:28225332:I	6p22.1	28225332	T	TA	0.008	0.423	0.201	0.253	1.223	(0.745-2.007)	0.425
rs13207345	6p22.1	28265572	C	T	0.073	0.999	0.043	0.056	1.044	(0.935-1.165)	0.439
rs72854513	6p22.1	28265954	A	T	0.073	0.999	0.043	0.056	1.044	(0.935-1.165)	0.44
rs56189111	6p22.1	28271973	C	A	0.073	0.999	0.043	0.056	1.044	(0.935-1.165)	0.44
rs13191786	6p22.1	28277671	T	G	0.073	0.999	0.043	0.056	1.044	(0.935-1.165)	0.441
rs2299031	6p22.1	28196718	T	C	0.036	0.958	0.061	0.08	1.063	(0.909-1.243)	0.441
rs17776284	6p22.1	28196454	G	A	0.036	0.957	0.061	0.08	1.063	(0.909-1.243)	0.442
rs1778478	6p22.1	28247638	A	T	0.19	0.997	-0.029	0.038	0.971	(0.902-1.047)	0.442
rs1778477	6p22.1	28248594	A	T	0.19	0.997	-0.029	0.038	0.971	(0.902-1.047)	0.447
rs11751702	6p22.1	28229529	G	C	0.175	0.999	-0.029	0.038	0.971	(0.902-1.047)	0.452
rs72854512	6p22.1	28264040	G	A	0.027	0.801	-0.077	0.102	0.926	(0.758-1.131)	0.452
rs2185955	6p22.1	28222980	A	G	0.175	0.999	-0.029	0.038	0.971	(0.902-1.047)	0.453
chr6:28192344:D	6p22.1	28192344	AC	A	0.964	0.548	0.08	0.106	1.083	(0.88-1.333)	0.454
chr6:28192123:D	6p22.1	28192123	CCT	C	0.111	0.825	0.038	0.051	1.039	(0.94-1.148)	0.46
rs35656932	6p22.1	28191288	G	T	0.073	0.994	0.041	0.056	1.042	(0.934-1.163)	0.462
rs35001169	6p22.1	28187632	T	G	0.073	0.994	0.041	0.056	1.042	(0.934-1.163)	0.462
rs33932084	6p22.1	28268824	A	G	0.073	0.998	0.041	0.056	1.042	(0.934-1.163)	0.464
rs11756111	6p22.1	28252859	T	C	0.187	0.996	-0.027	0.038	0.973	(0.904-1.049)	0.469
chr6:28215270:I	6p22.1	28215270	G	GA	0.175	0.999	-0.027	0.038	0.973	(0.904-1.049)	0.475
rs76983085	6p22.1	28234014	T	G	0.047	0.967	-0.049	0.069	0.952	(0.832-1.09)	0.479
chr6:28216427:I	6p22.1	28216427	A	AGAAACCTGTC	0.073	0.999	0.039	0.056	1.04	(0.932-1.16)	0.481
rs3800327	6p22.1	28264928	G	C	0.06	0.766	0.049	0.07	1.05	(0.916-1.205)	0.482
rs13208096	6p22.1	28225311	C	G	0.073	1	0.039	0.056	1.04	(0.932-1.16)	0.482
rs13204012	6p22.1	28201531	G	A	0.073	0.995	0.039	0.056	1.04	(0.932-1.16)	0.483
rs13205211	6p22.1	28203056	T	G	0.073	0.995	0.039	0.056	1.04	(0.932-1.16)	0.483
rs34243448	6p22.1	28193102	C	A	0.073	0.994	0.039	0.056	1.04	(0.932-1.16)	0.484
rs2235359	6p22.1	28215641	T	G	0.175	1	-0.027	0.038	0.973	(0.904-1.049)	0.485
rs115815993	6p22.1	28217831	G	T	0.047	0.967	-0.047	0.069	0.954	(0.833-1.092)	0.496
rs1150699	6p22.1	28181675	G	A	0.162	0.96	-0.027	0.04	0.973	(0.9-1.053)	0.501
rs1233664	6p22.1	28185726	C	T	0.162	0.961	-0.027	0.04	0.973	(0.9-1.053)	0.503
rs1150704	6p22.1	28184371	T	G	0.162	0.96	-0.027	0.04	0.973	(0.9-1.053)	0.503
rs74598819	6p22.1	28238735	A	G	0.014	0.678	0.1	0.149	1.105	(0.825-1.48)	0.503
rs1736890	6p22.1	28189389	A	G	0.162	0.963	-0.026	0.04	0.974	(0.901-1.054)	0.516
rs140150373	6p22.1	28191947	T	A	0.012	0.834	-0.096	0.149	0.908	(0.678-1.217)	0.517
rs2142731	6p22.1	28250913	A	G	0.007	0.856	0.121	0.187	1.129	(0.782-1.628)	0.519
chr6:28217830:D	6p22.1	28217830	TG	T	0.039	0.843	-0.053	0.082	0.948	(0.808-1.114)	0.519
chr6:28193570:I	6p22.1	28193570	C	CTTA	0.014	0.591	0.103	0.16	1.108	(0.81-1.517)	0.521
rs75876212	6p22.1	28211791	A	G	0.018	0.935	0.073	0.114	1.076	(0.86-1.345)	0.521
rs1736894	6p22.1	28186554	C	A	0.161	0.963	-0.026	0.04	0.974	(0.901-1.054)	0.524
rs7757215	6p22.1	28212489	C	A	0.048	0.968	0.043	0.069	1.044	(0.912-1.195)	0.528
chr6:28274650:D	6p22.1	28274650	AAT	A	0.042	0.931	0.047	0.075	1.048	(0.905-1.214)	0.529
rs12215841	6p22.1	28232893	G	A	0.024	0.446	-0.089	0.142	0.915	(0.693-1.208)	0.531
rs12000	6p22.1	28227436	A	G	0.233	0.999	-0.022	0.035	0.978	(0.913-1.048)	0.531
rs1778469	6p22.1	28188782	G	C	0.162	0.964	-0.025	0.04	0.975	(0.902-1.055)	0.533
chr6:28184638:I	6p22.1	28184638	C	CA	0.011	0.609	0.112	0.179	1.119	(0.788-1.589)	0.533
rs6933173	6p22.1	28184642	C	A	0.112	0.597	0.037	0.06	1.038	(0.923-1.167)	0.534
rs60913498	6p22.1	28211457	T	A	0.049	0.967	0.042	0.068	1.043	(0.913-1.192)	0.536
rs16893889	6p22.1	28237172	A	G	0.227	0.99	-0.022	0.035	0.978	(0.913-1.048)	0.537
rs147178674	6p22.1	28236979	C	G	0.006	0.538	0.154	0.249	1.166	(0.716-1.9)	0.537
rs2179174	6p22.1	28238969	A	G	0.23	0.998	-0.021	0.035	0.979	(0.914-1.049)	0.538
rs73740587	6p22.1	28187719	A	G	0.153	0.964	-0.025	0.041	0.975	(0.9-1.057)	0.548
rs34481509	6p22.1	28261417	A	G	0.061	0.834	-0.039	0.065	0.962	(0.847-1.092)	0.549
rs78224691	6p22.1	28237110	G	A	0.227	0.989	-0.021	0.035	0.979	(0.914-1.049)	0.552
rs73400581	6p22.1	28193467	G	A	0.049	0.964	0.041	0.068	1.042	(0.912-1.19)	0.552
rs148835585	6p22.1	28221106	T	C	0.01	0.521	-0.119	0.202	0.888	(0.598-1.319)	0.556
rs75621300	6p22.1	28265218	A	G	0.104	0.989	-0.028	0.048	0.972	(0.885-1.068)	0.562
rs80136959	6p22.1	28206813	A	T	0.153	0.972	-0.024	0.041	0.976	(0.901-1.058)	0.565
rs142255256	6p22.1	28199866	T	C	0.153	0.972	-0.023	0.041	0.977	(0.902-1.059)	0.57
rs138854355	6p22.1	28187466	C	T	0.048	0.607	0.049	0.087	1.05	(0.886-1.245)	0.577
rs7744788	6p22.1	28257720	A	G	0.104	0.988	-0.026	0.048	0.974	(0.887-1.07)	0.58
rs16901846	6p22.1	28254988	T	C	0.104	0.988	-0.026	0.048	0.974	(0.887-1.07)	0.584
rs116289313	6p22.1	28198828	C	T	0.049	0.945	-0.038	0.07	0.963	(0.839-1.104)	0.586
rs78793798	6p22.1	28194598	A	G	0.047	0.959	-0.038	0.07	0.963	(0.839-1.104)	0.588
rs114282057	6p22.1	28197416	A	G	0.008	0.898	-0.093	0.172	0.911	(0.65-1.276)	0.59
chr6:28211437:I	6p22.1	28211437	C	CT	0.038	0.426	0.062	0.117	1.064	(0.846-1.338)	0.595
rs9468316	6p22.1	28192125	T	C	0.156	0.945	-0.022	0.041	0.978	(0.903-1.06)	0.6
rs77793619	6p22.1	28192122	C	G	0.144	0.892	-0.023	0.044	0.977	(0.897-1.065)	0.604
rs1150723	6p22.1	28251716	T	A	0.023	0.527	0.069	0.134	1.071	(0.824-1.393)	0.609
rs115041649	6p22.1	28274653	G	C	0.046	0.986	0.035	0.069	1.036	(0.905-1.186)	0.614
rs79567170	6p22.1	28280057	C	T	0.046	0.987	0.034	0.069	1.035	(0.904-1.184)	0.619
rs188657567	6p22.1	28260925	G	A	0.012	0.32	0.118	0.239	1.125	(0.704-1.798)	0.622
rs16893929	6p22.1	28270817	C	T	0.046	0.987	0.034	0.069	1.035	(0.904-1.184)	0.625
rs7769054	6p22.1	28209197	C	G	0.151	0.962	-0.02	0.042	0.98	(0.903-1.064)	0.626
rs16893917	6p22.1	28269407	G	A	0.046	0.987	0.034	0.069	1.035	(0.904-1.184)	0.627
rs149700310	6p22.1	28220516	C	A	0.009	0.924	0.077	0.16	1.08	(0.789-1.478)	0.63
rs3800324	6p22.1	28264681	G	A	0.046	0.987	0.033	0.069	1.034	(0.903-1.183)	0.633
rs12201260	6p22.1	28197493	A	G	0.039	0.733	0.038	0.081	1.039	(0.886-1.217)	0.638
rs77986494	6p22.1	28261497	A	G	0.047	0.988	0.033	0.069	1.034	(0.903-1.183)	0.639
rs11758148	6p22.1	28207737	A	C	0.151	0.962	-0.019	0.042	0.981	(0.904-1.065)	0.642
chr6:28192343:D	6p22.1	28192343	AAC	A	0.725	0.557	0.02	0.044	1.02	(0.936-1.112)	0.653
rs73400579	6p22.1	28185554	T	C	0.007	0.962	0.08	0.181	1.083	(0.76-1.545)	0.659
chr6:28280202:D	6p22.1	28280202	GTC	G	0.008	0.983	0.072	0.164	1.075	(0.779-1.482)	0.659
rs6932394	6p22.1	28279058	G	A	0.008	0.983	0.072	0.164	1.075	(0.779-1.482)	0.661
rs112148779	6p22.1	28278726	A	C	0.008	0.983	0.072	0.164	1.075	(0.779-1.482)	0.662
rs115264941	6p22.1	28276402	C	T	0.008	0.983	0.072	0.164	1.075	(0.779-1.482)	0.662
rs112421400	6p22.1	28205826	C	T	0.058	0.969	0.027	0.063	1.027	(0.908-1.162)	0.671
rs41269287	6p22.1	28213918	G	A	0.022	0.735	0.048	0.114	1.049	(0.839-1.312)	0.672
chr6:28192332:I	6p22.1	28192332	C	CA	0.196	0.451	0.023	0.054	1.023	(0.921-1.138)	0.675
rs114972842	6p22.1	28259505	A	G	0.022	0.741	0.047	0.113	1.048	(0.84-1.308)	0.676
rs182026916	6p22.1	28189141	T	G	0.015	0.446	-0.075	0.181	0.928	(0.651-1.323)	0.678
rs76974121	6p22.1	28192971	G	A	0.04	0.734	0.033	0.08	1.034	(0.884-1.209)	0.68
rs61592622	6p22.1	28254062	A	G	0.009	0.92	0.066	0.16	1.068	(0.781-1.462)	0.682
rs145027629	6p22.1	28279146	G	A	0.024	0.562	-0.051	0.125	0.95	(0.744-1.214)	0.685
rs73400575	6p22.1	28184308	G	C	0.046	0.966	0.028	0.07	1.028	(0.897-1.18)	0.692
chr6:28265829:D	6p22.1	28265829	CAG	C	0.008	0.986	0.064	0.164	1.066	(0.773-1.47)	0.698
chr6:28265833:D	6p22.1	28265833	GAA	G	0.008	0.986	0.064	0.164	1.066	(0.773-1.47)	0.698
rs74409018	6p22.1	28220243	G	C	0.006	0.881	0.075	0.194	1.078	(0.737-1.577)	0.7
rs73385818	6p22.1	28264823	C	A	0.008	0.986	0.063	0.164	1.065	(0.772-1.469)	0.703
chr6:28192121:I	6p22.1	28192121	C	CG	0.134	0.894	-0.017	0.045	0.983	(0.9-1.074)	0.709
rs118139957	6p22.1	28224832	C	G	0.008	0.845	0.066	0.182	1.068	(0.748-1.526)	0.716
rs188646880	6p22.1	28226303	T	C	0.02	0.696	0.045	0.125	1.046	(0.819-1.336)	0.719
rs4713155	6p22.1	28234402	A	T	0.006	0.881	0.069	0.194	1.071	(0.733-1.567)	0.721
rs74589008	6p22.1	28235357	C	T	0.014	0.953	0.044	0.125	1.045	(0.818-1.335)	0.726
rs2235358	6p22.1	28216027	A	G	0.046	0.973	0.024	0.07	1.024	(0.893-1.175)	0.727
rs73385806	6p22.1	28255085	A	G	0.008	0.991	0.058	0.169	1.06	(0.761-1.476)	0.731
chr6:28192124:D	6p22.1	28192124	CT	C	0.141	0.901	-0.015	0.044	0.985	(0.904-1.074)	0.733
rs73742509	6p22.1	28235468	G	A	0.058	0.984	0.021	0.063	1.021	(0.903-1.155)	0.734
rs73400580	6p22.1	28191718	T	C	0.007	0.964	0.059	0.175	1.061	(0.753-1.495)	0.735
chr6:28259710:D	6p22.1	28259710	TA	T	0.008	0.989	0.056	0.165	1.058	(0.765-1.461)	0.735
rs75426794	6p22.1	28274651	A	G	0.191	0.995	0.012	0.037	1.012	(0.941-1.088)	0.736
rs73400590	6p22.1	28197963	T	C	0.007	0.968	0.058	0.174	1.06	(0.753-1.49)	0.739
rs1936364	6p22.1	28275625	T	A	0.191	0.995	0.012	0.037	1.012	(0.941-1.088)	0.741
rs115301752	6p22.1	28270274	C	T	0.041	0.575	0.031	0.096	1.031	(0.855-1.245)	0.743
rs74830143	6p22.1	28267108	C	T	0.014	0.911	0.042	0.127	1.043	(0.813-1.338)	0.743
rs147550448	6p22.1	28221689	C	A	0.046	0.988	0.023	0.07	1.023	(0.892-1.174)	0.745
rs113710928	6p22.1	28278112	A	C	0.014	0.946	0.041	0.125	1.042	(0.815-1.331)	0.746
rs78007034	6p22.1	28255949	G	C	0.04	0.983	0.023	0.075	1.023	(0.883-1.185)	0.755
rs73385810	6p22.1	28256472	A	T	0.008	0.991	0.051	0.165	1.052	(0.762-1.454)	0.758
rs76143968	6p22.1	28250202	A	G	0.014	0.947	0.038	0.124	1.039	(0.815-1.325)	0.76
rs73385807	6p22.1	28255531	T	A	0.008	0.992	0.05	0.165	1.051	(0.761-1.453)	0.764
chr6:28214425:I	6p22.1	28214425	G	GC	0.036	0.574	-0.03	0.103	0.97	(0.793-1.188)	0.771
rs73740597	6p22.1	28204159	A	G	0.01	0.968	-0.042	0.145	0.959	(0.722-1.274)	0.773
rs79093134	6p22.1	28260632	C	T	0.057	0.979	0.018	0.063	1.018	(0.9-1.152)	0.774
rs73740600	6p22.1	28210330	A	G	0.01	0.969	-0.042	0.145	0.959	(0.722-1.274)	0.774
rs78526066	6p22.1	28198672	G	A	0.026	0.571	0.034	0.12	1.035	(0.818-1.309)	0.778
rs41269285	6p22.1	28194799	T	C	0.049	0.974	-0.019	0.068	0.981	(0.859-1.121)	0.779
rs11967622	6p22.1	28188614	G	A	0.007	0.963	0.049	0.176	1.05	(0.744-1.483)	0.779
rs56057304	6p22.1	28207991	A	G	0.036	0.914	0.023	0.081	1.023	(0.873-1.199)	0.781
rs1150719	6p22.1	28256622	G	A	0.177	0.993	-0.011	0.039	0.989	(0.916-1.068)	0.783
rs1150717	6p22.1	28259597	T	C	0.176	0.994	-0.011	0.039	0.989	(0.916-1.068)	0.783
rs16893892	6p22.1	28239873	A	G	0.006	0.884	0.053	0.194	1.054	(0.721-1.542)	0.783
rs72849222	6p22.1	28202354	G	T	0.049	0.975	-0.019	0.068	0.981	(0.859-1.121)	0.784
chr6:28202324:D	6p22.1	28202324	CGTT	C	0.049	0.975	-0.019	0.068	0.981	(0.859-1.121)	0.785
rs11965542	6p22.1	28239943	G	A	0.008	0.992	0.045	0.166	1.046	(0.756-1.448)	0.786
rs72854515	6p22.1	28280137	T	C	0.057	0.991	-0.017	0.063	0.983	(0.869-1.112)	0.786
rs1150702	6p22.1	28184097	A	T	0.009	0.861	-0.044	0.162	0.957	(0.697-1.315)	0.786
rs7752415	6p22.1	28276744	G	A	0.057	0.991	-0.017	0.063	0.983	(0.869-1.112)	0.786
rs1150701	6p22.1	28183886	A	C	0.009	0.861	-0.044	0.162	0.957	(0.697-1.315)	0.786
rs1150720	6p22.1	28255749	A	G	0.176	0.994	-0.01	0.039	0.99	(0.917-1.069)	0.788
rs41269291	6p22.1	28251539	A	G	0.049	0.988	-0.018	0.068	0.982	(0.86-1.122)	0.791
rs112688333	6p22.1	28216617	A	G	0.008	0.993	0.043	0.165	1.044	(0.755-1.443)	0.795
rs73402513	6p22.1	28215941	A	C	0.008	0.993	0.043	0.165	1.044	(0.755-1.443)	0.795
rs72854506	6p22.1	28252497	T	C	0.049	0.987	-0.018	0.068	0.982	(0.86-1.122)	0.795
rs62638680	6p22.1	28219695	G	A	0.008	0.995	0.043	0.165	1.044	(0.755-1.443)	0.796
rs11966237	6p22.1	28233781	A	G	0.008	0.996	0.043	0.165	1.044	(0.755-1.443)	0.796
rs78765006	6p22.1	28242705	C	T	0.008	0.996	0.043	0.165	1.044	(0.755-1.443)	0.796
rs139554830	6p22.1	28220373	C	A	0.007	0.583	-0.057	0.221	0.945	(0.613-1.457)	0.798
rs60005089	6p22.1	28279474	G	T	0.01	0.966	-0.037	0.145	0.964	(0.725-1.28)	0.801
rs72854503	6p22.1	28248062	A	G	0.057	0.995	-0.016	0.063	0.984	(0.87-1.113)	0.805
rs57481919	6p22.1	28217838	T	C	0.011	0.975	-0.035	0.144	0.966	(0.728-1.28)	0.807
rs11758337	6p22.1	28260443	C	G	0.173	0.994	-0.009	0.039	0.991	(0.918-1.07)	0.809
rs116420641	6p22.1	28275458	G	A	0.049	0.985	-0.016	0.068	0.984	(0.861-1.124)	0.809
rs79184598	6p22.1	28233860	G	A	0.011	0.974	-0.035	0.144	0.966	(0.728-1.28)	0.809
rs78521938	6p22.1	28279823	G	A	0.049	0.985	-0.016	0.068	0.984	(0.861-1.124)	0.81
rs16893827	6p22.1	28197469	T	C	0.046	0.971	0.017	0.07	1.017	(0.887-1.167)	0.81
rs72849211	6p22.1	28182896	C	G	0.065	0.97	-0.014	0.06	0.986	(0.877-1.109)	0.811
chr6:28203902:D	6p22.1	28203902	TTAGTC	T	0.097	0.973	0.012	0.05	1.012	(0.918-1.116)	0.812
rs66487884	6p22.1	28202912	C	G	0.097	0.973	0.012	0.05	1.012	(0.918-1.116)	0.814
rs73742514	6p22.1	28266422	T	C	0.011	0.972	-0.032	0.143	0.969	(0.732-1.282)	0.824
rs73742515	6p22.1	28267947	A	G	0.011	0.972	-0.032	0.143	0.969	(0.732-1.282)	0.825
chr6:28258863:D	6p22.1	28258863	CAAAT	C	0.176	0.993	-0.009	0.039	0.991	(0.918-1.07)	0.825
rs185136354	6p22.1	28183717	C	T	0.006	0.91	-0.043	0.196	0.958	(0.652-1.407)	0.826
rs147955086	6p22.1	28275324	G	A	0.011	0.971	-0.031	0.143	0.969	(0.733-1.283)	0.827
rs72850300	6p22.1	28226903	C	G	0.049	0.989	-0.015	0.068	0.985	(0.862-1.126)	0.827
rs72850299	6p22.1	28223725	T	C	0.049	0.989	-0.014	0.068	0.986	(0.863-1.127)	0.833
rs72850302	6p22.1	28241398	A	G	0.049	0.989	-0.014	0.068	0.986	(0.863-1.127)	0.834
rs72850298	6p22.1	28222556	G	A	0.049	0.989	-0.014	0.068	0.986	(0.863-1.127)	0.836
rs145380951	6p22.1	28211582	A	G	0.05	0.968	-0.013	0.068	0.987	(0.864-1.128)	0.843
rs74478410	6p22.1	28257013	G	T	0.047	0.601	-0.017	0.089	0.983	(0.826-1.171)	0.845
rs72850297	6p22.1	28220578	C	T	0.057	0.997	-0.012	0.063	0.988	(0.873-1.118)	0.845
rs184388572	6p22.1	28241332	C	A	0.07	0.727	0.013	0.066	1.013	(0.89-1.153)	0.847
rs41269289	6p22.1	28227145	G	C	0.057	0.998	-0.012	0.063	0.988	(0.873-1.118)	0.847
rs140272569	6p22.1	28225053	C	T	0.057	0.998	-0.012	0.063	0.988	(0.873-1.118)	0.848
rs72849214	6p22.1	28187215	G	A	0.05	0.97	-0.013	0.068	0.987	(0.864-1.128)	0.851
rs75043119	6p22.1	28187424	A	C	0.05	0.97	-0.013	0.068	0.987	(0.864-1.128)	0.851
rs73740585	6p22.1	28184271	G	A	0.01	0.951	-0.027	0.152	0.973	(0.723-1.311)	0.857
chr6:28182680:I	6p22.1	28182680	T	TCAAAA	0.006	0.833	0.034	0.197	1.035	(0.703-1.522)	0.862
rs11757730	6p22.1	28259533	G	A	0.167	0.962	-0.007	0.04	0.993	(0.918-1.074)	0.867
chr6:28181867:I	6p22.1	28181867	C	CAT	0.013	0.94	0.022	0.132	1.022	(0.789-1.324)	0.868
rs3800325	6p22.1	28264692	C	G	0.142	0.958	0.007	0.043	1.007	(0.926-1.096)	0.876
chr6:28260148:D	6p22.1	28260148	TA	T	0.008	0.461	-0.037	0.24	0.964	(0.602-1.542)	0.878
rs17720774	6p22.1	28230796	A	G	0.049	0.675	-0.012	0.082	0.988	(0.841-1.16)	0.879
rs140619608	6p22.1	28226282	A	G	0.021	0.714	0.018	0.119	1.018	(0.806-1.286)	0.881
rs145676979	6p22.1	28226283	T	C	0.021	0.714	0.018	0.119	1.018	(0.806-1.286)	0.881
rs115944880	6p22.1	28267788	A	C	0.012	0.986	0.019	0.132	1.019	(0.787-1.32)	0.884
chr6:28193882:D	6p22.1	28193882	CT	C	0.012	0.96	0.018	0.132	1.018	(0.786-1.319)	0.891
rs1132343	6p22.1	28194405	G	T	0.012	0.96	0.018	0.132	1.018	(0.786-1.319)	0.891
rs148551916	6p22.1	28197834	A	G	0.012	0.963	0.018	0.132	1.018	(0.786-1.319)	0.892
rs111745957	6p22.1	28199246	T	G	0.012	0.964	0.018	0.132	1.018	(0.786-1.319)	0.892
rs76248972	6p22.1	28202415	C	T	0.012	0.964	0.018	0.132	1.018	(0.786-1.319)	0.892
chr6:28202113:D	6p22.1	28202113	CTG	C	0.012	0.964	0.018	0.132	1.018	(0.786-1.319)	0.892
rs75723495	6p22.1	28206766	A	T	0.012	0.965	0.018	0.132	1.018	(0.786-1.319)	0.893
rs79949269	6p22.1	28211412	A	G	0.012	0.967	0.018	0.132	1.018	(0.786-1.319)	0.894
rs142592282	6p22.1	28267783	A	C	0.012	0.991	0.017	0.132	1.017	(0.785-1.317)	0.895
chr6:28245831:D	6p22.1	28245831	TC	T	0.007	0.785	0.026	0.2	1.026	(0.694-1.519)	0.896
rs116384251	6p22.1	28259351	A	G	0.012	0.991	0.017	0.132	1.017	(0.785-1.317)	0.898
rs76071172	6p22.1	28191336	C	T	0.013	0.955	0.017	0.132	1.017	(0.785-1.317)	0.898
rs9468334	6p22.1	28272948	T	C	0.196	0.994	0.004	0.037	1.004	(0.934-1.08)	0.904
rs78465429	6p22.1	28218241	G	A	0.012	0.991	0.016	0.132	1.016	(0.784-1.316)	0.906
chr6:28267014:D	6p22.1	28267014	TA	T	0.012	0.98	0.015	0.131	1.015	(0.785-1.312)	0.907
rs76574137	6p22.1	28219858	G	A	0.012	0.992	0.015	0.132	1.015	(0.784-1.315)	0.907
rs79880617	6p22.1	28220174	T	A	0.012	0.992	0.015	0.132	1.015	(0.784-1.315)	0.909
rs76440553	6p22.1	28231917	A	G	0.012	0.992	0.015	0.132	1.015	(0.784-1.315)	0.909
rs111663108	6p22.1	28229849	A	G	0.012	0.992	0.015	0.132	1.015	(0.784-1.315)	0.909
chr6:28229407:D	6p22.1	28229407	GA	G	0.012	0.992	0.015	0.132	1.015	(0.784-1.315)	0.909
rs79405774	6p22.1	28220928	G	C	0.012	0.992	0.015	0.132	1.015	(0.784-1.315)	0.909
rs61737338	6p22.1	28227217	C	T	0.012	0.992	0.015	0.132	1.015	(0.784-1.315)	0.909
rs56053755	6p22.1	28267116	C	T	0.141	0.955	0.005	0.043	1.005	(0.924-1.093)	0.909
rs76825012	6p22.1	28276743	C	T	0.188	0.988	0.004	0.037	1.004	(0.934-1.08)	0.913
rs151080251	6p22.1	28275586	C	G	0.006	0.975	-0.02	0.192	0.98	(0.673-1.428)	0.918
rs76133270	6p22.1	28205506	T	G	0.012	0.963	0.013	0.132	1.013	(0.782-1.312)	0.919
rs7750106	6p22.1	28223680	C	A	0.058	0.997	0.006	0.062	1.006	(0.891-1.136)	0.92
rs182830074	6p22.1	28236823	G	A	0.022	0.672	0.012	0.12	1.012	(0.8-1.28)	0.921
rs1635	6p22.1	28227604	C	A	0.058	0.997	0.006	0.062	1.006	(0.891-1.136)	0.923
chr6:28250112:D	6p22.1	28250112	GACAA	G	0.012	0.986	0.012	0.132	1.012	(0.781-1.311)	0.928
rs1736893	6p22.1	28186726	C	G	0.1	0.663	-0.005	0.06	0.995	(0.885-1.119)	0.928
rs150027890	6p22.1	28276584	G	A	0.039	0.957	0.007	0.076	1.007	(0.868-1.169)	0.929
rs182852812	6p22.1	28260415	A	G	0.008	0.934	-0.015	0.17	0.985	(0.706-1.375)	0.93
rs2299030	6p22.1	28198755	T	C	0.037	0.966	0.006	0.078	1.006	(0.863-1.172)	0.936
chr6:28256400:D	6p22.1	28256400	TG	T	0.008	0.933	-0.013	0.17	0.987	(0.707-1.377)	0.941
rs79355918	6p22.1	28247477	A	G	0.036	0.973	0.005	0.079	1.005	(0.861-1.173)	0.946
rs1150713	6p22.1	28263107	A	C	0.148	0.993	0.003	0.041	1.003	(0.926-1.087)	0.946
rs41269293	6p22.1	28254862	G	C	0.008	0.936	-0.011	0.17	0.989	(0.709-1.38)	0.948
chr6:28227859:D	6p22.1	28227859	AG	A	0.018	0.714	0.008	0.129	1.008	(0.783-1.298)	0.951
rs1233710	6p22.1	28215446	C	T	0.047	0.991	-0.004	0.069	0.996	(0.87-1.14)	0.951
rs6905368	6p22.1	28262655	G	C	0.133	0.994	0.002	0.043	1.002	(0.921-1.09)	0.953
rs1150714	6p22.1	28262869	T	C	0.148	0.994	0.002	0.041	1.002	(0.925-1.086)	0.954
chr6:28229596:D	6p22.1	28229596	GTC	G	0.983	0.414	0.01	0.173	1.01	(0.72-1.418)	0.954
rs55831267	6p22.1	28263388	C	A	0.133	0.995	0.002	0.043	1.002	(0.921-1.09)	0.955
rs2281043	6p22.1	28268497	C	T	0.148	0.995	0.002	0.041	1.002	(0.925-1.086)	0.957
rs184050810	6p22.1	28251261	G	A	0.008	0.937	-0.009	0.17	0.991	(0.71-1.383)	0.958
rs6923170	6p22.1	28265547	G	A	0.148	0.995	0.002	0.041	1.002	(0.925-1.086)	0.958
rs16893937	6p22.1	28272868	G	A	0.133	0.996	0.002	0.043	1.002	(0.921-1.09)	0.962
rs6456811	6p22.1	28270047	C	G	0.148	0.995	0.002	0.041	1.002	(0.925-1.086)	0.964
rs1062169	6p22.1	28270251	G	A	0.148	0.995	0.002	0.041	1.002	(0.925-1.086)	0.964
rs1233712	6p22.1	28193131	G	A	0.009	0.884	-0.006	0.163	0.994	(0.722-1.368)	0.971
rs1150708	6p22.1	28205827	G	A	0.008	0.91	0.006	0.173	1.006	(0.717-1.412)	0.973
rs1150703	6p22.1	28184260	G	T	0.007	0.84	-0.006	0.194	0.994	(0.68-1.454)	0.976
rs17720687	6p22.1	28228747	A	G	0.036	0.974	0.002	0.079	1.002	(0.858-1.17)	0.976
rs1233706	6p22.1	28205711	T	C	0.007	0.923	0.005	0.177	1.005	(0.71-1.422)	0.976
rs3734564	6p22.1	28227860	G	A	0.036	0.975	-0.002	0.078	0.998	(0.857-1.163)	0.984
chr6:28182701:I	6p22.1	28182701	C	CAA	0.007	0.798	0.004	0.198	1.004	(0.681-1.48)	0.986
rs1150712	6p22.1	28213239	T	C	0.006	0.868	0.002	0.196	1.002	(0.682-1.471)	0.993
		NA			NA	NA	NA	NA	NA	(NA-NA)	NA
rs189286892	8q11.21	48689961	G	A	0.012	0.537	-0.694	0.188	0.5	(0.346-0.722)	0
rs144786027	8q11.21	48748531	G	A	0.007	0.856	-0.682	0.188	0.506	(0.35-0.731)	0
rs139516792	8q11.21	48717938	C	T	0.007	0.856	-0.682	0.188	0.506	(0.35-0.731)	0
rs8178252	8q11.21	48690558	C	T	0.006	0.835	-0.751	0.213	0.472	(0.311-0.716)	0
rs190121005	8q11.21	48692624	C	T	0.009	0.588	-0.72	0.207	0.487	(0.324-0.73)	0
rs79196108	8q11.21	48659008	A	G	0.018	0.807	0.292	0.123	1.339	(1.052-1.704)	0.018
rs184803814	8q11.21	48723603	C	T	0.007	0.513	0.454	0.249	1.575	(0.967-2.565)	0.068
rs146708026	8q11.21	48705905	C	T	0.006	0.355	-0.556	0.32	0.573	(0.306-1.074)	0.083
rs77770830	8q11.21	48685818	G	C	0.007	0.718	0.365	0.213	1.441	(0.949-2.187)	0.086
chr8:48709340:I	8q11.21	48709340	T	TA	0.066	0.963	0.102	0.06	1.107	(0.985-1.246)	0.089
rs146188128	8q11.21	48712132	T	G	0.02	0.464	0.235	0.155	1.265	(0.934-1.714)	0.13
rs62539156	8q11.21	48697592	C	G	0.007	0.46	0.382	0.266	1.465	(0.87-2.468)	0.151
rs150946685	8q11.21	48754451	C	T	0.007	0.66	0.281	0.203	1.324	(0.89-1.972)	0.167
rs45507799	8q11.21	48710684	G	A	0.009	0.541	-0.279	0.202	0.757	(0.509-1.124)	0.168
chr8:48687327:I	8q11.21	48687327	C	CT	0.013	0.443	-0.259	0.196	0.772	(0.526-1.133)	0.186
rs143109871	8q11.21	48667724	C	A	0.01	0.736	0.217	0.164	1.242	(0.901-1.713)	0.187
rs193033481	8q11.21	48685006	T	C	0.012	0.58	0.214	0.172	1.239	(0.884-1.735)	0.215
rs72646391	8q11.21	48687031	C	G	0.02	0.408	-0.186	0.159	0.83	(0.608-1.134)	0.245
rs62539155	8q11.21	48692431	G	C	0.012	0.325	0.257	0.233	1.293	(0.819-2.041)	0.271
rs137884888	8q11.21	48687770	A	T	0.012	0.645	-0.172	0.163	0.842	(0.612-1.159)	0.29
rs183022373	8q11.21	48720245	C	T	0.011	0.663	0.176	0.168	1.192	(0.858-1.657)	0.295
rs191226016	8q11.21	48708495	G	A	0.012	0.558	-0.185	0.177	0.831	(0.587-1.176)	0.295
rs8178259	8q11.21	48687778	T	A	0.02	0.603	-0.138	0.134	0.871	(0.67-1.133)	0.305
rs112601435	8q11.21	48662826	T	C	0.009	0.323	0.264	0.264	1.302	(0.776-2.185)	0.318
rs146933089	8q11.21	48733572	C	T	0.015	0.842	-0.126	0.129	0.882	(0.685-1.135)	0.331
chr8:48711171:D	8q11.21	48711171	GCA	G	0.01	0.435	0.215	0.221	1.24	(0.804-1.912)	0.331
chr8:48698854:I	8q11.21	48698854	T	TC	0.01	0.434	0.215	0.221	1.24	(0.804-1.912)	0.332
rs149846044	8q11.21	48709575	T	C	0.015	0.855	-0.125	0.129	0.882	(0.685-1.136)	0.334
rs150162309	8q11.21	48710274	C	T	0.015	0.855	-0.125	0.129	0.882	(0.685-1.136)	0.336
rs191266228	8q11.21	48708002	G	A	0.015	0.855	-0.124	0.129	0.883	(0.686-1.138)	0.336
rs139737406	8q11.21	48704033	C	T	0.015	0.855	-0.124	0.129	0.883	(0.686-1.138)	0.337
rs181293156	8q11.21	48715339	G	A	0.007	0.892	-0.174	0.182	0.84	(0.588-1.2)	0.338
rs143116990	8q11.21	48701987	C	T	0.015	0.855	-0.124	0.129	0.883	(0.686-1.138)	0.338
rs7830743	8q11.21	48710955	A	G	0.057	1	0.057	0.063	1.059	(0.936-1.198)	0.366
rs146308009	8q11.21	48674420	G	A	0.016	0.609	-0.135	0.15	0.874	(0.651-1.172)	0.369
rs141154042	8q11.21	48696598	T	C	0.057	0.997	0.056	0.063	1.058	(0.935-1.197)	0.381
rs118162034	8q11.21	48727608	T	G	0.057	0.999	0.055	0.063	1.057	(0.934-1.195)	0.383
rs4873728	8q11.21	48739440	C	A	0.057	0.999	0.054	0.063	1.055	(0.933-1.194)	0.39
rs146160864	8q11.21	48717061	A	G	0.057	0.999	0.054	0.063	1.055	(0.933-1.194)	0.392
rs7828380	8q11.21	48711682	C	G	0.058	0.999	0.053	0.063	1.054	(0.932-1.193)	0.398
rs7832898	8q11.21	48722783	T	C	0.059	0.989	0.053	0.062	1.054	(0.934-1.191)	0.399
chr8:48726136:D	8q11.21	48726136	AT	A	0.038	0.356	-0.108	0.128	0.898	(0.698-1.154)	0.399
rs144457792	8q11.21	48684893	C	T	0.024	0.599	-0.103	0.123	0.902	(0.709-1.148)	0.399
rs10097508	8q11.21	48745344	C	T	0.058	0.999	0.052	0.063	1.053	(0.931-1.192)	0.403
rs141412008	8q11.21	48659992	A	G	0.077	0.439	0.068	0.082	1.07	(0.911-1.257)	0.407
rs7830633	8q11.21	48678205	G	A	0.061	0.973	0.05	0.062	1.051	(0.931-1.187)	0.422
rs189044159	8q11.21	48685076	A	G	0.017	0.953	0.092	0.115	1.096	(0.875-1.374)	0.426
rs189835942	8q11.21	48659851	C	T	0.006	0.941	-0.15	0.189	0.861	(0.594-1.247)	0.427
rs7830350	8q11.21	48677981	G	A	0.058	0.997	0.05	0.063	1.051	(0.929-1.189)	0.427
rs28809491	8q11.21	48666070	G	A	0.057	0.989	0.05	0.063	1.051	(0.929-1.189)	0.429
rs28795698	8q11.21	48670183	T	C	0.058	0.996	0.049	0.063	1.05	(0.928-1.188)	0.431
rs150744576	8q11.21	48677478	C	G	0.008	0.47	-0.186	0.236	0.83	(0.523-1.319)	0.432
rs7017622	8q11.21	48668558	G	A	0.058	0.996	0.049	0.063	1.05	(0.928-1.188)	0.432
rs185113395	8q11.21	48696249	C	A	0.006	0.942	-0.149	0.189	0.862	(0.595-1.248)	0.432
rs10109158	8q11.21	48721675	A	G	0.062	0.983	0.044	0.061	1.045	(0.927-1.178)	0.469
rs74992121	8q11.21	48684514	C	T	0.012	0.894	0.102	0.143	1.107	(0.837-1.466)	0.475
rs8178225	8q11.21	48711857	C	T	0.009	0.566	0.143	0.206	1.154	(0.77-1.728)	0.487
rs7845909	8q11.21	48684365	A	T	0.478	0.895	0.021	0.031	1.021	(0.961-1.085)	0.489
rs115056889	8q11.21	48705210	G	C	0.054	0.975	0.045	0.066	1.046	(0.919-1.19)	0.489
rs137953562	8q11.21	48663245	T	C	0.009	0.435	-0.151	0.24	0.86	(0.537-1.376)	0.53
rs8178216	8q11.21	48719844	G	A	0.009	1	0.095	0.152	1.1	(0.816-1.481)	0.533
rs79283501	8q11.21	48734892	C	T	0.056	0.999	0.038	0.062	1.039	(0.92-1.173)	0.545
rs112365698	8q11.21	48661413	G	A	0.03	0.592	-0.067	0.111	0.935	(0.752-1.162)	0.546
rs2725277	8q11.21	48672124	C	A	0.056	0.999	0.037	0.062	1.038	(0.919-1.172)	0.549
rs189808179	8q11.21	48668643	G	A	0.028	0.419	0.082	0.137	1.085	(0.83-1.42)	0.549
rs4278157	8q11.21	48739305	G	A	0.056	1	0.037	0.062	1.038	(0.919-1.172)	0.55
rs2466760	8q11.21	48689893	C	G	0.056	0.997	0.036	0.062	1.037	(0.918-1.171)	0.56
rs117782174	8q11.21	48722329	C	T	0.007	0.579	0.138	0.239	1.148	(0.719-1.834)	0.564
rs141447907	8q11.21	48715459	C	T	0.01	0.873	0.091	0.157	1.095	(0.805-1.49)	0.564
rs143222038	8q11.21	48707319	T	C	0.007	0.579	0.137	0.239	1.147	(0.718-1.832)	0.567
rs2632502	8q11.21	48671294	G	A	0.056	1	0.035	0.062	1.036	(0.917-1.169)	0.567
rs62539154	8q11.21	48677930	G	A	0.093	0.952	0.029	0.051	1.029	(0.932-1.138)	0.569
rs79810317	8q11.21	48693758	C	A	0.034	0.961	0.045	0.083	1.046	(0.889-1.231)	0.585
chr8:48687504:D	8q11.21	48687504	GTC	G	0.043	0.965	0.04	0.074	1.041	(0.9-1.203)	0.586
chr8:48711073:D	8q11.21	48711073	CTCT	C	0.022	0.74	0.06	0.115	1.062	(0.848-1.33)	0.601
rs6995756	8q11.21	48710301	A	G	0.063	0.999	0.031	0.06	1.031	(0.917-1.16)	0.605
rs72646401	8q11.21	48724723	C	G	0.064	0.99	0.03	0.06	1.03	(0.916-1.159)	0.611
rs182911889	8q11.21	48688555	T	C	0.007	0.826	-0.095	0.191	0.909	(0.625-1.322)	0.618
rs8178249	8q11.21	48691068	G	A	0.007	0.826	-0.095	0.191	0.909	(0.625-1.322)	0.618
rs117034947	8q11.21	48710724	G	A	0.01	0.747	0.082	0.167	1.085	(0.782-1.506)	0.624
rs6473736	8q11.21	48687774	A	T	0.165	0.681	-0.023	0.047	0.977	(0.891-1.072)	0.63
rs7839161	8q11.21	48684355	C	G	0.063	0.998	0.028	0.06	1.028	(0.914-1.157)	0.636
rs116848774	8q11.21	48703304	C	T	0.018	0.367	-0.079	0.18	0.924	(0.649-1.315)	0.66
chr8:48680444:D	8q11.21	48680444	AT	A	0.01	0.905	0.067	0.155	1.069	(0.789-1.449)	0.667
rs8178243	8q11.21	48694884	G	A	0.009	1	-0.065	0.153	0.937	(0.694-1.265)	0.671
rs138239814	8q11.21	48675714	C	A	0.008	0.554	-0.091	0.22	0.913	(0.593-1.405)	0.678
chr8:48674936:I	8q11.21	48674936	G	GC	0.026	0.514	0.05	0.128	1.051	(0.818-1.351)	0.697
rs75840615	8q11.21	48714974	C	A	0.017	0.325	0.076	0.197	1.079	(0.733-1.587)	0.698
rs2955067	8q11.21	48674068	G	A	0.113	0.969	0.015	0.046	1.015	(0.928-1.111)	0.752
rs143576275	8q11.21	48674067	C	T	0.014	0.779	0.043	0.14	1.044	(0.793-1.374)	0.758
rs117988840	8q11.21	48668401	G	A	0.042	0.963	-0.022	0.074	0.978	(0.846-1.131)	0.762
rs9918758	8q11.21	48663714	A	C	0.066	0.995	-0.017	0.059	0.983	(0.876-1.104)	0.766
rs4521758	8q11.21	48741570	C	T	0.122	1	0.012	0.044	1.012	(0.928-1.103)	0.779
rs117431673	8q11.21	48753856	C	T	0.045	1	0.018	0.071	1.018	(0.886-1.17)	0.803
chr8:48747249:I	8q11.21	48747249	T	TC	0.066	0.995	-0.015	0.059	0.985	(0.878-1.106)	0.805
rs7813617	8q11.21	48666031	T	C	0.067	0.998	-0.014	0.058	0.986	(0.88-1.105)	0.806
rs6473701	8q11.21	48659988	G	A	0.099	0.749	-0.013	0.057	0.987	(0.883-1.104)	0.813
chr8:48740550:D	8q11.21	48740550	TG	T	0.026	0.593	-0.028	0.118	0.972	(0.772-1.225)	0.815
rs144272057	8q11.21	48695447	T	C	0.026	0.864	0.023	0.099	1.023	(0.843-1.242)	0.821
rs192017321	8q11.21	48678199	C	G	0.008	0.682	0.045	0.2	1.046	(0.707-1.548)	0.824
rs2515631	8q11.21	48707977	C	T	0.058	0.989	-0.014	0.063	0.986	(0.872-1.116)	0.825
rs112914460	8q11.21	48737941	G	A	0.058	0.989	-0.014	0.063	0.986	(0.872-1.116)	0.826
rs7014544	8q11.21	48744985	C	G	0.067	1	-0.012	0.058	0.988	(0.882-1.107)	0.838
rs8178213	8q11.21	48729746	G	A	0.034	0.79	-0.018	0.09	0.982	(0.823-1.172)	0.838
rs183370880	8q11.21	48708030	G	A	0.007	0.702	0.04	0.199	1.041	(0.705-1.537)	0.842
rs7016660	8q11.21	48713898	A	G	0.067	1	-0.011	0.058	0.989	(0.883-1.108)	0.845
rs7838910	8q11.21	48714335	C	T	0.067	1	-0.011	0.058	0.989	(0.883-1.108)	0.845
rs7818445	8q11.21	48725136	G	T	0.068	0.991	-0.011	0.058	0.989	(0.883-1.108)	0.847
rs8178258	8q11.21	48689366	C	T	0.067	0.999	-0.011	0.058	0.989	(0.883-1.108)	0.85
rs8178238	8q11.21	48697424	C	G	0.049	0.957	0.013	0.069	1.013	(0.885-1.16)	0.855
chr8:48697006:D	8q11.21	48697006	CA	C	0.049	0.957	0.013	0.069	1.013	(0.885-1.16)	0.855
rs72646396	8q11.21	48696105	C	A	0.049	0.957	0.013	0.069	1.013	(0.885-1.16)	0.856
rs8178255	8q11.21	48690066	A	G	0.066	1	-0.01	0.059	0.99	(0.882-1.111)	0.87
chr8:48747246:I	8q11.21	48747246	A	ACTT	0.063	0.985	-0.009	0.061	0.991	(0.879-1.117)	0.876
rs72647906	8q11.21	48747977	T	G	0.067	0.998	-0.009	0.058	0.991	(0.885-1.11)	0.884
rs75252820	8q11.21	48663720	G	T	0.012	0.392	-0.03	0.214	0.97	(0.638-1.476)	0.89
rs74337706	8q11.21	48727894	G	C	0.056	1	-0.007	0.064	0.993	(0.876-1.126)	0.915
rs141876505	8q11.21	48698560	G	A	0.006	0.591	-0.023	0.238	0.977	(0.613-1.558)	0.923
rs13255227	8q11.21	48674122	C	T	0.058	1	-0.005	0.062	0.995	(0.881-1.124)	0.933
rs188779667	8q11.21	48733033	C	T	0.039	0.502	0.009	0.106	1.009	(0.82-1.242)	0.935
rs8178179	8q11.21	48745127	T	G	0.056	1	-0.004	0.064	0.996	(0.879-1.129)	0.947
rs55738030	8q11.21	48736863	G	A	0.015	0.793	-0.008	0.136	0.992	(0.76-1.295)	0.955
rs7831196	8q11.21	48670303	C	T	0.069	0.985	0.002	0.058	1.002	(0.894-1.123)	0.968
rs113638202	8q11.21	48747250	T	C	0.053	0.826	0.002	0.072	1.002	(0.87-1.154)	0.976
		NA			NA	NA	NA	NA	NA	(NA-NA)	NA
rs12935084	16p13.3	1336249	T	C	0.71	0.755	-0.111	0.037	0.895	(0.832-0.962)	0.003
rs4984799	16p13.3	1337717	T	C	0.712	0.756	-0.108	0.037	0.898	(0.835-0.965)	0.003
rs4984800	16p13.3	1338307	C	A	0.712	0.753	-0.108	0.037	0.898	(0.835-0.965)	0.004
rs2268049	16p13.3	1371154	C	T	0.154	1	0.114	0.04	1.121	(1.036-1.212)	0.004
rs4984801	16p13.3	1339927	A	C	0.329	0.545	-0.119	0.042	0.888	(0.818-0.964)	0.005
rs12102342	16p13.3	1362556	G	A	0.147	0.939	0.119	0.042	1.126	(1.037-1.223)	0.005
rs147584646	16p13.3	1386922	C	A	0.006	0.509	-0.706	0.252	0.494	(0.301-0.809)	0.005
rs8052688	16p13.3	1372183	G	C	0.155	0.993	0.112	0.04	1.119	(1.034-1.21)	0.005
rs12446440	16p13.3	1330216	C	T	0.567	0.682	-0.099	0.036	0.906	(0.844-0.972)	0.005
rs191529904	16p13.3	1342601	T	C	0.057	0.432	-0.264	0.095	0.768	(0.638-0.925)	0.006
rs112402119	16p13.3	1410736	C	T	0.044	0.657	0.242	0.087	1.274	(1.074-1.511)	0.006
rs8062442	16p13.3	1361079	A	G	0.146	0.929	0.117	0.043	1.124	(1.033-1.223)	0.006
rs28510571	16p13.3	1372582	T	A	0.155	0.995	0.11	0.04	1.116	(1.032-1.207)	0.006
rs12719791	16p13.3	1347968	G	A	0.794	0.855	-0.105	0.039	0.9	(0.834-0.972)	0.006
rs4610	16p13.3	1364365	A	G	0.138	0.931	0.118	0.044	1.125	(1.032-1.227)	0.007
rs78704578	16p13.3	1406271	G	A	0.006	0.513	-0.688	0.257	0.503	(0.304-0.832)	0.007
rs2281226	16p13.3	1364767	A	C	0.618	0.979	-0.081	0.03	0.922	(0.87-0.978)	0.008
rs11647760	16p13.3	1367610	C	A	0.617	0.978	-0.081	0.03	0.922	(0.87-0.978)	0.008
rs12918274	16p13.3	1365325	C	A	0.618	0.979	-0.081	0.03	0.922	(0.87-0.978)	0.008
rs4984797	16p13.3	1336403	G	A	0.58	0.717	-0.093	0.035	0.911	(0.851-0.976)	0.008
rs7185893	16p13.3	1354589	T	G	0.703	0.878	-0.09	0.034	0.914	(0.855-0.977)	0.008
rs2401948	16p13.3	1340854	G	C	0.569	0.825	-0.086	0.032	0.918	(0.862-0.977)	0.008
rs62011260	16p13.3	1358561	T	G	0.616	0.973	-0.08	0.03	0.923	(0.87-0.979)	0.008
rs34128123	16p13.3	1326832	T	A	0.043	0.44	-0.287	0.109	0.751	(0.606-0.929)	0.008
rs7500182	16p13.3	1341297	C	A	0.32	0.84	0.09	0.034	1.094	(1.024-1.17)	0.008
rs4984809	16p13.3	1366048	A	G	0.616	0.979	-0.08	0.03	0.923	(0.87-0.979)	0.008
rs4984643	16p13.3	1339755	C	T	0.295	0.546	-0.114	0.043	0.892	(0.82-0.971)	0.008
rs4984802	16p13.3	1340465	A	C	0.578	0.824	-0.086	0.033	0.918	(0.86-0.979)	0.009
rs188642699	16p13.3	1418446	A	G	0.016	0.644	-0.381	0.146	0.683	(0.513-0.91)	0.009
rs75893715	16p13.3	1360091	C	T	0.286	0.952	0.086	0.033	1.09	(1.022-1.163)	0.009
rs9674436	16p13.3	1342841	A	G	0.581	0.868	-0.082	0.032	0.921	(0.865-0.981)	0.009
rs11248863	16p13.3	1344768	T	C	0.589	0.895	-0.081	0.031	0.922	(0.868-0.98)	0.009
rs4984811	16p13.3	1378069	A	G	0.393	0.684	-0.094	0.036	0.91	(0.848-0.977)	0.01
rs12920764	16p13.3	1362187	C	T	0.615	0.976	-0.078	0.03	0.925	(0.872-0.981)	0.01
rs11248866	16p13.3	1365341	G	A	0.615	0.977	-0.078	0.03	0.925	(0.872-0.981)	0.01
rs8060456	16p13.3	1368202	G	A	0.137	0.929	0.113	0.044	1.12	(1.027-1.22)	0.01
rs4984798	16p13.3	1336438	G	A	0.581	0.715	-0.09	0.035	0.914	(0.853-0.979)	0.01
rs141528465	16p13.3	1343811	C	A	0.021	0.649	0.325	0.127	1.384	(1.079-1.775)	0.011
rs12102374	16p13.3	1362559	C	G	0.142	0.949	0.109	0.043	1.115	(1.025-1.213)	0.011
rs114342132	16p13.3	1391137	C	T	0.01	0.647	-0.471	0.186	0.624	(0.434-0.899)	0.011
rs4984808	16p13.3	1365967	C	T	0.616	0.974	-0.077	0.03	0.926	(0.873-0.982)	0.011
chr16:1372825:I	16p13.3	1372825	C	CT	0.158	0.983	0.1	0.04	1.105	(1.022-1.195)	0.012
rs8057293	16p13.3	1360843	C	T	0.145	0.944	0.106	0.042	1.112	(1.024-1.207)	0.013
rs13333511	16p13.3	1354412	G	A	0.15	0.935	0.104	0.042	1.11	(1.022-1.205)	0.014
rs8060742	16p13.3	1361167	G	T	0.143	0.95	0.105	0.043	1.111	(1.021-1.208)	0.014
rs72775490	16p13.3	1360657	C	T	0.1	0.547	-0.16	0.065	0.852	(0.75-0.968)	0.014
rs8056919	16p13.3	1360601	C	T	0.143	0.946	0.104	0.043	1.11	(1.02-1.207)	0.015
rs28625102	16p13.3	1351027	C	A	0.286	0.965	0.08	0.033	1.083	(1.015-1.156)	0.015
rs113951440	16p13.3	1417791	T	C	0.05	0.661	0.199	0.082	1.22	(1.039-1.433)	0.015
rs8047143	16p13.3	1349659	T	G	0.286	0.974	0.079	0.033	1.082	(1.014-1.155)	0.015
rs1061621	16p13.3	1376892	C	T	0.164	1	0.094	0.039	1.099	(1.018-1.186)	0.017
rs1061611	16p13.3	1376838	C	T	0.163	0.998	0.093	0.039	1.097	(1.017-1.185)	0.017
rs67594383	16p13.3	1342492	C	T	0.51	0.718	-0.082	0.034	0.921	(0.862-0.985)	0.017
rs9926183	16p13.3	1363878	C	T	0.271	0.981	0.078	0.033	1.081	(1.013-1.153)	0.017
rs761063	16p13.3	1376386	G	C	0.713	0.952	-0.078	0.033	0.925	(0.867-0.987)	0.018
rs2401949	16p13.3	1346686	A	G	0.71	0.979	-0.076	0.032	0.927	(0.87-0.987)	0.018
rs4984803	16p13.3	1349929	G	A	0.614	0.963	-0.072	0.031	0.931	(0.876-0.989)	0.018
rs11641374	16p13.3	1347717	C	A	0.613	0.964	-0.072	0.031	0.931	(0.876-0.989)	0.019
rs1061633	16p13.3	1376929	C	T	0.162	0.996	0.09	0.039	1.094	(1.014-1.181)	0.021
rs11647740	16p13.3	1347862	T	C	0.614	0.959	-0.07	0.031	0.932	(0.877-0.991)	0.022
rs9921869	16p13.3	1354583	T	G	0.146	0.943	0.096	0.042	1.101	(1.014-1.195)	0.023
rs9940055	16p13.3	1333387	C	T	0.572	0.701	-0.08	0.035	0.923	(0.862-0.989)	0.023
rs113817326	16p13.3	1389394	G	A	0.05	0.714	0.179	0.079	1.196	(1.024-1.396)	0.023
rs28457180	16p13.3	1375789	A	G	0.164	0.985	0.089	0.039	1.093	(1.013-1.18)	0.024
rs7187167	16p13.3	1349209	T	C	0.709	1	-0.072	0.032	0.931	(0.874-0.991)	0.024
rs142707844	16p13.3	1364392	C	T	0.006	0.65	0.525	0.237	1.69	(1.062-2.69)	0.027
rs2369842	16p13.3	1366425	G	T	0.283	0.967	0.073	0.033	1.076	(1.008-1.148)	0.027
rs180969192	16p13.3	1344481	G	A	0.016	0.466	-0.374	0.17	0.688	(0.493-0.96)	0.028
chr16:1342708:D	16p13.3	1342708	CTT	C	0.502	0.726	-0.075	0.034	0.928	(0.868-0.992)	0.028
rs11648562	16p13.3	1373024	C	G	0.347	0.644	-0.082	0.038	0.921	(0.855-0.993)	0.032
rs8063	16p13.3	1374818	A	G	0.728	1	-0.068	0.033	0.934	(0.876-0.997)	0.037
rs11648216	16p13.3	1373017	G	A	0.344	0.644	-0.078	0.038	0.925	(0.859-0.996)	0.041
rs4017714	16p13.3	1366317	A	G	0.151	0.922	0.085	0.042	1.089	(1.003-1.182)	0.045
chr16:1337089:I	16p13.3	1337089	T	TA	0.856	0.791	-0.093	0.047	0.911	(0.831-0.999)	0.045
rs13332240	16p13.3	1323540	G	A	0.024	0.374	-0.308	0.154	0.735	(0.543-0.994)	0.046
rs187653083	16p13.3	1395615	A	T	0.064	0.563	0.156	0.079	1.169	(1.001-1.365)	0.05
chr16:1357844:D	16p13.3	1357844	GGAGA	G	0.152	0.921	0.082	0.042	1.085	(1-1.179)	0.052
rs11648215	16p13.3	1373015	G	A	0.347	0.644	-0.074	0.038	0.929	(0.862-1)	0.055
rs761060	16p13.3	1374656	A	G	0.831	0.708	-0.087	0.046	0.917	(0.838-1.003)	0.058
rs113223071	16p13.3	1335279	T	C	0.16	0.469	0.108	0.057	1.114	(0.996-1.246)	0.059
rs7204003	16p13.3	1377363	G	A	0.47	0.712	0.063	0.034	1.065	(0.996-1.138)	0.069
rs75998799	16p13.3	1366079	G	A	0.033	0.458	-0.22	0.121	0.803	(0.633-1.017)	0.069
rs76707057	16p13.3	1336434	C	T	0.066	0.435	-0.16	0.089	0.852	(0.716-1.015)	0.071
rs188259912	16p13.3	1326233	G	A	0.007	0.381	-0.503	0.281	0.605	(0.349-1.049)	0.074
rs3826051	16p13.3	1414498	C	T	0.42	0.652	-0.065	0.036	0.937	(0.873-1.006)	0.075
rs113609879	16p13.3	1336504	C	T	0.028	0.454	-0.232	0.131	0.793	(0.613-1.025)	0.078
rs114413799	16p13.3	1351612	C	A	0.051	0.497	-0.163	0.093	0.85	(0.708-1.019)	0.081
rs77558238	16p13.3	1322410	G	A	0.007	0.803	0.337	0.194	1.401	(0.958-2.049)	0.083
rs113045719	16p13.3	1331596	C	A	0.028	0.451	-0.225	0.131	0.799	(0.618-1.032)	0.086
rs112989995	16p13.3	1336549	A	G	0.028	0.455	-0.224	0.131	0.799	(0.618-1.033)	0.088
rs192368474	16p13.3	1407524	G	A	0.008	0.515	-0.375	0.222	0.687	(0.445-1.062)	0.091
rs113140905	16p13.3	1333355	T	C	0.027	0.454	-0.218	0.133	0.804	(0.62-1.044)	0.099
rs111288705	16p13.3	1334382	G	A	0.027	0.454	-0.218	0.132	0.804	(0.621-1.042)	0.1
rs140532679	16p13.3	1362890	A	G	0.009	0.588	-0.32	0.197	0.726	(0.494-1.068)	0.105
rs73500249	16p13.3	1335928	G	A	0.031	0.45	-0.201	0.126	0.818	(0.639-1.047)	0.111
chr16:1358064:D	16p13.3	1358064	GAGTA	G	0.025	0.456	-0.218	0.138	0.804	(0.614-1.054)	0.114
rs28541713	16p13.3	1401845	C	G	0.035	0.705	0.148	0.094	1.16	(0.964-1.394)	0.116
rs142974143	16p13.3	1335957	G	A	0.025	0.429	-0.225	0.145	0.799	(0.601-1.061)	0.121
rs72775486	16p13.3	1341353	G	A	0.008	0.5	0.35	0.23	1.419	(0.904-2.227)	0.128
rs8046903	16p13.3	1362011	C	T	0.028	0.641	0.165	0.109	1.179	(0.953-1.46)	0.131
rs9673869	16p13.3	1343163	G	C	0.495	0.745	-0.051	0.034	0.95	(0.889-1.016)	0.132
rs187697657	16p13.3	1383681	G	T	0.036	0.557	-0.157	0.105	0.855	(0.696-1.05)	0.133
rs12103312	16p13.3	1398602	G	A	0.033	0.735	0.14	0.095	1.15	(0.955-1.386)	0.138
rs117394445	16p13.3	1354069	A	G	0.01	0.447	-0.326	0.222	0.722	(0.467-1.115)	0.143
rs11648851	16p13.3	1419087	A	G	0.786	0.488	0.074	0.051	1.077	(0.974-1.19)	0.146
chr16:1343225:D	16p13.3	1343225	TC	T	0.013	0.466	-0.268	0.186	0.765	(0.531-1.101)	0.151
rs60937866	16p13.3	1401187	T	C	0.034	0.723	0.135	0.095	1.145	(0.95-1.379)	0.154
rs145682619	16p13.3	1332303	C	T	0.007	0.36	-0.423	0.3	0.655	(0.364-1.179)	0.157
rs148328147	16p13.3	1356745	G	A	0.019	0.63	0.191	0.136	1.21	(0.927-1.58)	0.16
rs189991767	16p13.3	1326888	G	A	0.03	0.457	-0.177	0.126	0.838	(0.654-1.072)	0.16
rs61749061	16p13.3	1389196	C	T	0.011	0.426	0.3	0.214	1.35	(0.887-2.053)	0.162
rs189481636	16p13.3	1358874	G	A	0.007	0.489	-0.344	0.246	0.709	(0.438-1.148)	0.163
rs761055	16p13.3	1393181	G	C	0.032	0.728	0.135	0.097	1.145	(0.946-1.384)	0.164
rs139949164	16p13.3	1349696	A	G	0.008	0.342	-0.377	0.272	0.686	(0.402-1.169)	0.167
rs58198264	16p13.3	1327471	G	A	0.031	0.409	-0.181	0.131	0.834	(0.645-1.079)	0.167
rs180841971	16p13.3	1357612	T	G	0.009	0.515	-0.289	0.212	0.749	(0.494-1.135)	0.174
rs11866635	16p13.3	1391132	C	T	0.031	0.738	0.132	0.098	1.141	(0.942-1.383)	0.18
rs8055112	16p13.3	1397698	G	A	0.032	0.731	0.129	0.096	1.138	(0.943-1.373)	0.182
rs146267392	16p13.3	1414074	C	G	0.006	0.518	0.351	0.263	1.42	(0.848-2.379)	0.183
chr16:1362079:I	16p13.3	1362079	C	CA	0.044	0.488	-0.134	0.101	0.875	(0.718-1.066)	0.188
rs142132780	16p13.3	1418046	G	T	0.022	0.806	0.146	0.111	1.157	(0.931-1.438)	0.188
rs2294605	16p13.3	1400693	C	T	0.392	0.644	0.049	0.038	1.05	(0.975-1.131)	0.195
chr16:1342706:D	16p13.3	1342706	CA	C	0.439	0.612	-0.048	0.037	0.953	(0.886-1.025)	0.196
rs146223320	16p13.3	1398345	C	A	0.006	0.602	-0.309	0.241	0.734	(0.458-1.177)	0.199
rs72779215	16p13.3	1400019	G	A	0.046	0.516	-0.122	0.095	0.885	(0.735-1.066)	0.199
rs189382337	16p13.3	1332688	G	A	0.007	0.525	-0.314	0.245	0.731	(0.452-1.181)	0.2
chr16:1397283	16p13.3	1397283	T	C	0.006	0.369	-0.397	0.31	0.672	(0.366-1.234)	0.2
rs8053760	16p13.3	1409080	A	G	0.413	0.68	0.047	0.037	1.048	(0.975-1.127)	0.201
rs34428580	16p13.3	1414830	C	T	0.087	0.502	-0.094	0.074	0.91	(0.787-1.052)	0.203
rs74823949	16p13.3	1414910	T	C	0.031	0.717	0.126	0.1	1.134	(0.932-1.38)	0.205
rs143894144	16p13.3	1392148	C	T	0.006	0.442	-0.361	0.286	0.697	(0.398-1.221)	0.207
rs73500234	16p13.3	1327103	C	G	0.009	0.43	-0.294	0.234	0.745	(0.471-1.179)	0.209
rs77633104	16p13.3	1388909	C	T	0.016	0.718	0.174	0.139	1.19	(0.906-1.563)	0.21
chr16:1394746	16p13.3	1394746	A	G	0.08	0.512	0.092	0.075	1.096	(0.946-1.27)	0.219
rs140794528	16p13.3	1378796	A	T	0.032	0.771	-0.116	0.095	0.89	(0.739-1.073)	0.222
rs114280977	16p13.3	1394491	G	A	0.064	0.47	0.106	0.088	1.112	(0.936-1.321)	0.229
chr16:1394741:D	16p13.3	1394741	AGCCAACAGG	A	0.381	0.615	-0.046	0.039	0.955	(0.885-1.031)	0.231
rs112744716	16p13.3	1330298	C	G	0.01	0.48	-0.247	0.207	0.781	(0.521-1.172)	0.233
rs710902	16p13.3	1376510	T	C	0.875	0.942	-0.054	0.045	0.947	(0.867-1.035)	0.234
rs150337481	16p13.3	1393589	G	A	0.01	0.451	-0.263	0.224	0.769	(0.496-1.192)	0.241
rs138705096	16p13.3	1356902	G	A	0.008	0.445	-0.279	0.239	0.757	(0.474-1.209)	0.243
rs139916311	16p13.3	1352620	G	A	0.016	0.561	0.178	0.156	1.195	(0.88-1.622)	0.253
rs17807737	16p13.3	1329964	C	T	0.076	0.577	-0.083	0.073	0.92	(0.798-1.062)	0.254
rs4017713	16p13.3	1366436	G	C	0.138	0.93	0.05	0.044	1.051	(0.964-1.146)	0.256
rs140321291	16p13.3	1393267	A	C	0.039	0.689	0.102	0.091	1.107	(0.926-1.324)	0.264
rs115466201	16p13.3	1372135	G	A	0.029	0.642	0.12	0.107	1.127	(0.914-1.391)	0.266
rs61647420	16p13.3	1329767	T	G	0.016	0.516	0.18	0.162	1.197	(0.872-1.645)	0.266
rs78947817	16p13.3	1381181	T	C	0.009	0.597	0.217	0.197	1.242	(0.844-1.828)	0.271
rs2235631	16p13.3	1392236	C	T	0.006	0.373	-0.346	0.316	0.708	(0.381-1.314)	0.274
rs116468525	16p13.3	1405044	G	A	0.012	0.772	0.163	0.15	1.177	(0.877-1.579)	0.275
rs182246200	16p13.3	1419067	T	G	0.039	0.506	-0.114	0.106	0.892	(0.725-1.098)	0.281
rs142542904	16p13.3	1408337	A	G	0.008	0.647	-0.212	0.198	0.809	(0.549-1.193)	0.284
rs77961034	16p13.3	1329135	C	A	0.068	0.491	0.088	0.083	1.092	(0.928-1.285)	0.286
rs8060970	16p13.3	1407093	G	T	0.157	0.695	-0.052	0.048	0.949	(0.864-1.043)	0.286
rs11645659	16p13.3	1378356	C	T	0.03	0.453	-0.133	0.127	0.875	(0.683-1.123)	0.294
rs139294140	16p13.3	1379706	G	A	0.018	0.733	0.133	0.128	1.142	(0.889-1.468)	0.297
rs79959864	16p13.3	1417375	A	C	0.035	0.662	0.1	0.096	1.105	(0.916-1.334)	0.298
rs138209905	16p13.3	1393613	G	A	0.03	0.787	-0.102	0.098	0.903	(0.745-1.094)	0.3
rs11248865	16p13.3	1354179	C	T	0.033	0.447	-0.123	0.122	0.884	(0.696-1.123)	0.312
chr16:1394750	16p13.3	1394750	G	A	0.011	0.331	0.248	0.246	1.281	(0.791-2.075)	0.313
rs186443993	16p13.3	1406484	C	T	0.009	0.396	-0.24	0.239	0.787	(0.492-1.257)	0.315
rs118090684	16p13.3	1347520	T	C	0.009	0.859	0.168	0.17	1.183	(0.848-1.651)	0.324
rs188732504	16p13.3	1350042	G	A	0.006	0.646	0.217	0.229	1.242	(0.793-1.946)	0.344
rs141196266	16p13.3	1321904	C	T	0.04	0.444	0.106	0.113	1.112	(0.891-1.387)	0.349
rs138288642	16p13.3	1420341	C	T	0.011	0.427	0.199	0.213	1.22	(0.804-1.852)	0.349
rs143992901	16p13.3	1378499	G	A	0.043	0.796	0.074	0.08	1.077	(0.921-1.26)	0.355
rs11248873	16p13.3	1400478	C	T	0.358	0.629	0.036	0.039	1.037	(0.96-1.119)	0.355
rs12597545	16p13.3	1394430	C	T	0.374	0.608	0.036	0.039	1.037	(0.96-1.119)	0.356
rs11866615	16p13.3	1419667	A	G	0.988	0.802	0.138	0.149	1.148	(0.857-1.537)	0.356
rs28654239	16p13.3	1401895	G	C	0.037	0.703	0.085	0.093	1.089	(0.907-1.306)	0.356
rs117793364	16p13.3	1342994	G	A	0.017	0.428	-0.157	0.171	0.855	(0.611-1.195)	0.36
rs184427725	16p13.3	1345967	T	C	0.007	0.476	-0.226	0.248	0.798	(0.491-1.297)	0.363
rs2235632	16p13.3	1393020	G	A	0.453	0.619	0.033	0.038	1.034	(0.959-1.113)	0.375
chr16:1394740:D	16p13.3	1394740	GAGCCAAC	G	0.349	0.593	-0.036	0.04	0.965	(0.892-1.043)	0.376
chr16:1409275:I	16p13.3	1409275	G	GT	0.028	0.538	-0.105	0.12	0.9	(0.712-1.139)	0.381
rs12921496	16p13.3	1328479	T	A	0.566	0.525	-0.035	0.04	0.966	(0.893-1.044)	0.382
rs117282191	16p13.3	1388141	T	C	0.024	0.769	0.095	0.108	1.1	(0.89-1.359)	0.382
rs34468534	16p13.3	1391221	G	A	0.381	0.625	-0.034	0.039	0.967	(0.895-1.043)	0.384
rs184399423	16p13.3	1342657	T	C	0.041	0.594	0.083	0.096	1.087	(0.9-1.311)	0.391
rs78268478	16p13.3	1389629	A	G	0.03	0.694	0.088	0.103	1.092	(0.892-1.336)	0.391
rs909919	16p13.3	1370868	A	G	0.989	0.824	0.129	0.152	1.138	(0.845-1.533)	0.396
chr16:1374401:I	16p13.3	1374401	C	CT	0.844	0.805	0.037	0.045	1.038	(0.95-1.133)	0.406
rs34019514	16p13.3	1349564	C	T	0.011	0.778	-0.131	0.159	0.877	(0.642-1.198)	0.411
rs28755969	16p13.3	1418596	T	C	0.742	0.631	0.034	0.042	1.035	(0.953-1.123)	0.413
rs151054423	16p13.3	1393264	G	A	0.029	0.778	-0.081	0.1	0.922	(0.758-1.122)	0.42
rs80026191	16p13.3	1382459	A	T	0.198	0.634	-0.037	0.046	0.964	(0.881-1.055)	0.42
chr16:1358496:D	16p13.3	1358496	ATGAG	A	0.023	0.783	0.086	0.109	1.09	(0.88-1.349)	0.43
rs190793233	16p13.3	1354736	C	T	0.009	0.625	-0.152	0.193	0.859	(0.588-1.254)	0.431
rs11641860	16p13.3	1326837	A	G	0.366	0.49	0.034	0.043	1.035	(0.951-1.126)	0.435
rs138288520	16p13.3	1358858	G	C	0.043	0.637	0.07	0.09	1.073	(0.899-1.279)	0.436
rs113612401	16p13.3	1327436	G	A	0.029	0.71	0.079	0.102	1.082	(0.886-1.322)	0.438
rs8046527	16p13.3	1369073	C	G	0.892	0.973	-0.037	0.047	0.964	(0.879-1.057)	0.441
rs909912	16p13.3	1380868	C	A	0.464	0.611	-0.029	0.038	0.971	(0.902-1.047)	0.446
rs149144749	16p13.3	1355747	T	G	0.006	0.612	-0.178	0.235	0.837	(0.528-1.327)	0.448
rs184761081	16p13.3	1342579	C	T	0.103	0.465	-0.053	0.069	0.948	(0.828-1.086)	0.449
chr16:1385464:I	16p13.3	1385464	G	GC	0.23	0.549	-0.035	0.047	0.966	(0.881-1.059)	0.449
chr16:1362082:I	16p13.3	1362082	C	CG	0.898	0.912	-0.038	0.05	0.963	(0.873-1.062)	0.45
rs2369700	16p13.3	1374513	G	A	0.888	0.956	-0.036	0.047	0.965	(0.88-1.058)	0.45
chr16:1383724:D	16p13.3	1383724	GC	G	0.46	0.602	-0.029	0.038	0.971	(0.902-1.047)	0.452
chr16:1393851:D	16p13.3	1393851	GCTGGGACAGGCCGT	G	0.057	0.67	0.058	0.077	1.06	(0.911-1.232)	0.452
rs9935863	16p13.3	1384908	C	T	0.009	0.485	-0.16	0.214	0.852	(0.56-1.296)	0.455
rs60129568	16p13.3	1387049	G	A	0.007	0.37	-0.22	0.295	0.803	(0.45-1.431)	0.456
rs11642118	16p13.3	1388618	G	A	0.017	0.816	-0.091	0.123	0.913	(0.717-1.162)	0.457
rs8052605	16p13.3	1379374	G	T	0.89	0.957	-0.035	0.048	0.966	(0.879-1.061)	0.457
rs742458	16p13.3	1392877	T	C	0.407	0.621	-0.028	0.038	0.972	(0.903-1.048)	0.457
rs8058975	16p13.3	1364917	G	T	0.022	0.804	0.082	0.111	1.085	(0.873-1.349)	0.459
rs4984816	16p13.3	1389993	T	C	0.892	0.875	0.037	0.05	1.038	(0.941-1.145)	0.461
rs145620183	16p13.3	1362952	A	T	0.022	0.803	0.082	0.111	1.085	(0.873-1.349)	0.462
rs1575040	16p13.3	1361075	G	A	0.079	0.928	0.041	0.056	1.042	(0.934-1.163)	0.462
rs12447872	16p13.3	1380322	T	C	0.919	0.897	-0.041	0.056	0.96	(0.86-1.071)	0.463
rs11865211	16p13.3	1402493	C	T	0.027	0.748	0.075	0.103	1.078	(0.881-1.319)	0.468
rs118089365	16p13.3	1355806	C	T	0.022	0.801	0.08	0.111	1.083	(0.871-1.347)	0.469
rs12719789	16p13.3	1328535	C	T	0.421	0.522	-0.029	0.041	0.971	(0.896-1.053)	0.471
rs182200691	16p13.3	1360531	C	T	0.006	0.562	0.188	0.263	1.207	(0.721-2.021)	0.475
rs12149281	16p13.3	1379020	T	A	0.27	0.571	-0.031	0.043	0.969	(0.891-1.055)	0.477
rs12719790	16p13.3	1328598	C	T	0.414	0.523	-0.029	0.041	0.971	(0.896-1.053)	0.479
rs186602992	16p13.3	1359383	A	G	0.007	0.459	-0.176	0.251	0.839	(0.513-1.372)	0.482
rs9922926	16p13.3	1383608	A	G	0.49	0.587	0.027	0.039	1.027	(0.952-1.109)	0.489
rs57890635	16p13.3	1411129	C	T	0.289	0.603	-0.029	0.042	0.971	(0.895-1.055)	0.492
rs1883561	16p13.3	1380761	T	G	0.459	0.625	-0.026	0.038	0.974	(0.904-1.05)	0.494
rs72779206	16p13.3	1382352	T	G	0.126	0.56	-0.04	0.059	0.961	(0.856-1.079)	0.503
rs62012934	16p13.3	1330798	C	T	0.013	0.484	-0.126	0.188	0.882	(0.61-1.274)	0.503
rs62011305	16p13.3	1411126	A	T	0.578	0.649	0.024	0.037	1.024	(0.953-1.101)	0.507
rs116986044	16p13.3	1398934	G	A	0.016	0.828	-0.083	0.125	0.92	(0.72-1.176)	0.509
rs113785479	16p13.3	1339513	T	A	0.078	0.853	0.039	0.058	1.04	(0.928-1.165)	0.509
rs140183420	16p13.3	1336195	G	A	0.009	0.379	0.163	0.248	1.177	(0.724-1.914)	0.512
chr16:1382898:I	16p13.3	1382898	G	GA	0.015	0.49	-0.11	0.168	0.896	(0.645-1.245)	0.512
chr16:1372777:D	16p13.3	1372777	AG	A	0.323	0.673	-0.025	0.038	0.975	(0.905-1.051)	0.513
rs80026488	16p13.3	1330069	G	A	0.078	0.797	0.04	0.061	1.041	(0.924-1.173)	0.514
rs8062881	16p13.3	1361651	C	G	0.127	0.951	0.029	0.045	1.029	(0.943-1.124)	0.516
rs117738549	16p13.3	1334697	G	A	0.018	0.65	-0.089	0.138	0.915	(0.698-1.199)	0.519
rs7190309	16p13.3	1371496	A	G	0.891	0.98	-0.03	0.047	0.97	(0.885-1.064)	0.522
rs4984813	16p13.3	1384220	A	G	0.923	0.85	0.038	0.059	1.039	(0.925-1.166)	0.523
rs4984817	16p13.3	1398818	G	C	0.891	0.884	0.032	0.05	1.033	(0.936-1.139)	0.525
rs35786958	16p13.3	1326785	A	T	0.357	0.491	-0.027	0.044	0.973	(0.893-1.061)	0.528
rs74655871	16p13.3	1358669	G	A	0.127	0.95	0.028	0.045	1.028	(0.942-1.123)	0.529
rs62011307	16p13.3	1420086	C	T	0.008	0.788	0.115	0.184	1.122	(0.782-1.609)	0.533
rs62012932	16p13.3	1321927	T	C	0.006	0.454	0.178	0.287	1.195	(0.681-2.097)	0.535
rs761056	16p13.3	1393191	C	T	0.871	0.892	0.029	0.046	1.029	(0.941-1.127)	0.536
rs140222202	16p13.3	1411368	G	A	0.008	0.532	0.139	0.224	1.149	(0.741-1.783)	0.536
rs761054	16p13.3	1393178	G	A	0.87	0.889	0.029	0.046	1.029	(0.941-1.127)	0.536
rs8047332	16p13.3	1362295	C	T	0.127	0.951	0.028	0.045	1.028	(0.942-1.123)	0.54
rs34250044	16p13.3	1353734	C	T	0.067	0.481	-0.052	0.085	0.949	(0.804-1.121)	0.541
rs115266906	16p13.3	1405970	G	A	0.05	0.62	-0.052	0.086	0.949	(0.802-1.124)	0.544
rs139312447	16p13.3	1383189	G	A	0.007	0.413	0.164	0.272	1.178	(0.691-2.008)	0.547
rs10903005	16p13.3	1377578	G	C	0.891	0.974	-0.028	0.047	0.972	(0.887-1.066)	0.547
rs1811834	16p13.3	1379523	T	C	0.878	0.894	-0.028	0.047	0.972	(0.887-1.066)	0.55
rs75956141	16p13.3	1416355	C	T	0.02	0.47	0.091	0.152	1.095	(0.813-1.475)	0.551
chr16:1398074:I	16p13.3	1398074	T	TCC	0.885	0.858	0.03	0.05	1.03	(0.934-1.137)	0.551
rs117303694	16p13.3	1332756	C	T	0.037	0.557	0.062	0.104	1.064	(0.868-1.305)	0.552
rs11646486	16p13.3	1326892	G	C	0.175	0.551	0.031	0.052	1.031	(0.932-1.142)	0.552
rs138056410	16p13.3	1363386	C	T	0.127	0.954	0.027	0.045	1.027	(0.941-1.122)	0.552
rs7186045	16p13.3	1365943	C	T	0.127	0.956	0.027	0.045	1.027	(0.941-1.122)	0.557
rs2235633	16p13.3	1366140	C	T	0.127	0.957	0.026	0.045	1.026	(0.94-1.121)	0.557
chr16:1376999:I	16p13.3	1376999	C	CA	0.893	0.988	-0.028	0.047	0.972	(0.887-1.066)	0.559
rs138570401	16p13.3	1403665	C	T	0.028	0.782	-0.058	0.1	0.944	(0.776-1.148)	0.562
rs141727396	16p13.3	1323895	G	A	0.017	0.429	-0.099	0.172	0.906	(0.647-1.269)	0.564
rs7205697	16p13.3	1407615	C	T	0.874	0.807	0.028	0.049	1.028	(0.934-1.132)	0.566
rs35372461	16p13.3	1337523	T	C	0.08	0.843	0.033	0.058	1.034	(0.922-1.158)	0.568
rs57913519	16p13.3	1395611	A	C	0.478	0.569	0.022	0.039	1.022	(0.947-1.103)	0.568
rs731046	16p13.3	1376405	G	A	0.017	0.819	-0.07	0.123	0.932	(0.733-1.187)	0.57
rs111839679	16p13.3	1417607	C	A	0.05	0.678	0.046	0.081	1.047	(0.893-1.227)	0.57
rs6600134	16p13.3	1362038	A	C	0.897	0.957	-0.028	0.049	0.972	(0.883-1.07)	0.57
rs909913	16p13.3	1380870	T	C	0.893	0.947	-0.027	0.048	0.973	(0.886-1.069)	0.572
rs112254148	16p13.3	1373070	C	T	0.07	0.554	-0.044	0.078	0.957	(0.821-1.115)	0.573
rs144282065	16p13.3	1349528	G	A	0.014	0.754	0.08	0.143	1.083	(0.819-1.434)	0.577
rs10903006	16p13.3	1381707	A	G	0.893	0.943	-0.027	0.048	0.973	(0.886-1.069)	0.581
rs909914	16p13.3	1381714	A	G	0.893	0.943	-0.027	0.048	0.973	(0.886-1.069)	0.581
rs150120826	16p13.3	1379005	T	C	0.028	0.815	-0.054	0.099	0.947	(0.78-1.15)	0.583
rs4984822	16p13.3	1414887	A	G	0.843	0.851	-0.023	0.043	0.977	(0.898-1.063)	0.594
rs143510648	16p13.3	1413938	C	T	0.006	0.524	0.143	0.269	1.154	(0.681-1.955)	0.595
rs189437102	16p13.3	1342587	T	C	0.056	0.487	-0.048	0.09	0.953	(0.799-1.137)	0.595
rs146698176	16p13.3	1407870	C	T	0.007	0.52	-0.131	0.247	0.877	(0.541-1.423)	0.595
rs183665448	16p13.3	1372912	G	A	0.011	0.498	-0.106	0.2	0.899	(0.608-1.331)	0.598
rs7199081	16p13.3	1390545	A	C	0.406	0.605	-0.02	0.039	0.98	(0.908-1.058)	0.6
chr16:1367731:I	16p13.3	1367731	A	AC	0.893	0.978	-0.025	0.048	0.975	(0.888-1.072)	0.604
rs112444742	16p13.3	1337123	C	T	0.08	0.841	0.03	0.058	1.03	(0.92-1.155)	0.609
chr16:1378768:D	16p13.3	1378768	AATTT	A	0.027	0.825	-0.051	0.099	0.95	(0.783-1.154)	0.61
rs72779216	16p13.3	1400283	A	C	0.013	0.585	-0.084	0.167	0.919	(0.663-1.275)	0.613
rs8050313	16p13.3	1375563	G	T	0.892	0.995	-0.024	0.047	0.976	(0.89-1.07)	0.615
rs761061	16p13.3	1375914	A	G	0.892	0.994	-0.023	0.047	0.977	(0.891-1.072)	0.618
rs761062	16p13.3	1375960	A	G	0.892	0.994	-0.023	0.047	0.977	(0.891-1.072)	0.618
rs761064	16p13.3	1376430	T	C	0.892	0.993	-0.023	0.047	0.977	(0.891-1.072)	0.623
rs2887538	16p13.3	1410133	G	A	0.614	0.653	0.018	0.037	1.018	(0.947-1.095)	0.623
rs11648169	16p13.3	1385451	C	G	0.375	0.638	-0.018	0.038	0.982	(0.912-1.058)	0.63
rs118138478	16p13.3	1386358	G	T	0.076	0.742	-0.031	0.064	0.969	(0.855-1.099)	0.63
rs7302	16p13.3	1375263	T	G	0.889	1	-0.022	0.046	0.978	(0.894-1.071)	0.637
rs761059	16p13.3	1374524	A	G	0.581	0.654	-0.017	0.037	0.983	(0.914-1.057)	0.639
rs13333385	16p13.3	1324097	G	A	0.348	0.476	-0.021	0.044	0.979	(0.898-1.067)	0.64
rs12373114	16p13.3	1324103	A	G	0.348	0.476	-0.021	0.044	0.979	(0.898-1.067)	0.643
rs112493599	16p13.3	1391893	C	T	0.011	0.466	0.097	0.212	1.102	(0.727-1.669)	0.646
chr16:1397518:I	16p13.3	1397518	G	GC	0.809	0.714	0.02	0.044	1.02	(0.936-1.112)	0.647
rs12922525	16p13.3	1321875	T	G	0.872	0.616	-0.026	0.056	0.974	(0.873-1.087)	0.649
rs113575698	16p13.3	1328386	C	G	0.077	0.543	-0.033	0.074	0.968	(0.837-1.119)	0.654
rs36008476	16p13.3	1353507	G	A	0.077	0.898	0.025	0.057	1.025	(0.917-1.147)	0.657
rs4984644	16p13.3	1407792	T	C	0.912	0.791	0.025	0.057	1.025	(0.917-1.147)	0.658
rs7198283	16p13.3	1367650	C	A	0.893	0.98	-0.021	0.048	0.979	(0.891-1.076)	0.658
rs186746820	16p13.3	1386634	C	T	0.009	0.431	-0.102	0.232	0.903	(0.573-1.423)	0.66
rs4638578	16p13.3	1366308	T	A	0.893	0.978	-0.021	0.048	0.979	(0.891-1.076)	0.66
rs4984810	16p13.3	1366070	A	G	0.893	0.978	-0.021	0.048	0.979	(0.891-1.076)	0.66
rs8062227	16p13.3	1368517	C	T	0.893	0.98	-0.021	0.048	0.979	(0.891-1.076)	0.661
rs12449104	16p13.3	1368982	C	A	0.893	0.981	-0.021	0.048	0.979	(0.891-1.076)	0.661
rs4984807	16p13.3	1365935	C	G	0.894	0.978	-0.021	0.048	0.979	(0.891-1.076)	0.661
rs761058	16p13.3	1374163	A	G	0.894	0.991	-0.021	0.047	0.979	(0.893-1.074)	0.662
rs8063596	16p13.3	1365250	G	A	0.894	0.977	-0.021	0.048	0.979	(0.891-1.076)	0.662
rs8044721	16p13.3	1365210	A	G	0.894	0.977	-0.021	0.048	0.979	(0.891-1.076)	0.662
rs4984806	16p13.3	1364281	T	C	0.894	0.976	-0.021	0.048	0.979	(0.891-1.076)	0.662
rs9941160	16p13.3	1364140	T	C	0.894	0.975	-0.021	0.048	0.979	(0.891-1.076)	0.663
rs9926094	16p13.3	1363742	C	G	0.894	0.975	-0.021	0.048	0.979	(0.891-1.076)	0.663
rs12925270	16p13.3	1375937	C	A	0.191	0.571	-0.022	0.05	0.978	(0.887-1.079)	0.665
rs10903004	16p13.3	1362819	T	C	0.894	0.974	-0.021	0.048	0.979	(0.891-1.076)	0.665
rs4017786	16p13.3	1370597	G	C	0.893	0.984	-0.021	0.047	0.979	(0.893-1.074)	0.666
rs113946793	16p13.3	1330909	T	G	0.163	0.704	0.02	0.048	1.02	(0.929-1.121)	0.667
rs4984805	16p13.3	1359217	A	G	0.894	0.971	-0.02	0.048	0.98	(0.892-1.077)	0.67
rs62011261	16p13.3	1358563	C	A	0.894	0.971	-0.02	0.048	0.98	(0.892-1.077)	0.671
rs11643527	16p13.3	1372710	T	G	0.894	0.988	-0.02	0.047	0.98	(0.894-1.075)	0.672
rs8053875	16p13.3	1372163	C	G	0.894	0.988	-0.02	0.047	0.98	(0.894-1.075)	0.672
rs6600137	16p13.3	1407441	A	G	0.89	0.875	0.021	0.05	1.021	(0.926-1.126)	0.674
rs113792347	16p13.3	1389751	C	G	0.373	0.583	-0.017	0.04	0.983	(0.909-1.063)	0.675
rs12446893	16p13.3	1371295	G	A	0.894	0.987	-0.02	0.047	0.98	(0.894-1.075)	0.675
rs9933497	16p13.3	1369730	A	G	0.894	0.985	-0.02	0.047	0.98	(0.894-1.075)	0.678
rs12447051	16p13.3	1371246	C	G	0.894	0.986	-0.02	0.047	0.98	(0.894-1.075)	0.679
rs8063770	16p13.3	1370614	C	G	0.894	0.986	-0.02	0.047	0.98	(0.894-1.075)	0.679
rs8043720	16p13.3	1370630	A	G	0.894	0.986	-0.02	0.047	0.98	(0.894-1.075)	0.679
rs909917	16p13.3	1370309	C	G	0.894	0.986	-0.02	0.047	0.98	(0.894-1.075)	0.679
rs909918	16p13.3	1370729	C	A	0.894	0.986	-0.02	0.047	0.98	(0.894-1.075)	0.679
rs909916	16p13.3	1370303	T	C	0.894	0.986	-0.02	0.047	0.98	(0.894-1.075)	0.679
rs188035944	16p13.3	1382392	G	A	0.006	0.6	0.103	0.25	1.108	(0.679-1.809)	0.68
rs12597285	16p13.3	1420487	A	G	0.897	0.892	0.021	0.051	1.021	(0.924-1.129)	0.681
rs8045459	16p13.3	1369176	G	A	0.894	0.985	-0.02	0.048	0.98	(0.892-1.077)	0.681
rs909915	16p13.3	1369926	T	C	0.894	0.985	-0.02	0.047	0.98	(0.894-1.075)	0.681
rs35723863	16p13.3	1330421	G	A	0.163	0.701	0.019	0.048	1.019	(0.928-1.12)	0.682
rs4984812	16p13.3	1383911	T	C	0.888	0.906	-0.02	0.049	0.98	(0.89-1.079)	0.683
rs8046847	16p13.3	1369250	C	G	0.894	0.984	-0.019	0.047	0.981	(0.895-1.076)	0.684
rs12926175	16p13.3	1323159	G	A	0.067	0.417	-0.037	0.091	0.964	(0.806-1.152)	0.686
rs35397349	16p13.3	1333607	T	C	0.096	0.857	0.022	0.053	1.022	(0.921-1.134)	0.686
rs35639513	16p13.3	1333562	C	T	0.096	0.857	0.022	0.053	1.022	(0.921-1.134)	0.686
rs11248868	16p13.3	1373593	G	T	0.894	0.987	-0.019	0.047	0.981	(0.895-1.076)	0.686
rs11248867	16p13.3	1373283	G	C	0.894	0.987	-0.019	0.047	0.981	(0.895-1.076)	0.687
rs761057	16p13.3	1404726	T	C	0.895	0.893	0.02	0.051	1.02	(0.923-1.127)	0.688
rs10903007	16p13.3	1420556	A	G	0.898	0.893	0.021	0.051	1.021	(0.924-1.129)	0.688
rs118154114	16p13.3	1324419	T	G	0.057	0.578	0.033	0.083	1.034	(0.878-1.216)	0.689
rs117956012	16p13.3	1338124	C	T	0.017	0.662	-0.056	0.139	0.946	(0.72-1.242)	0.689
rs8060108	16p13.3	1382470	G	C	0.89	0.93	-0.019	0.048	0.981	(0.893-1.078)	0.689
rs150288155	16p13.3	1338331	G	A	0.017	0.663	-0.056	0.139	0.946	(0.72-1.242)	0.689
rs11864305	16p13.3	1387253	A	T	0.403	0.625	-0.015	0.038	0.985	(0.914-1.061)	0.691
chr16:1408199:D	16p13.3	1408199	CA	C	0.051	0.438	0.04	0.101	1.041	(0.854-1.269)	0.691
rs1132358	16p13.3	1397815	C	T	0.413	0.607	-0.015	0.038	0.985	(0.914-1.061)	0.693
rs62014776	16p13.3	1339750	G	A	0.095	0.874	0.021	0.053	1.021	(0.92-1.133)	0.696
rs35388401	16p13.3	1404746	C	T	0.014	0.573	-0.063	0.162	0.939	(0.684-1.29)	0.698
rs111684211	16p13.3	1383716	C	T	0.462	0.61	-0.015	0.038	0.985	(0.914-1.061)	0.698
rs112915913	16p13.3	1369074	T	C	0.131	0.908	0.018	0.046	1.018	(0.93-1.114)	0.701
rs7202125	16p13.3	1373919	G	C	0.89	0.978	-0.018	0.047	0.982	(0.896-1.077)	0.703
chr16:1408194:D	16p13.3	1408194	TC	T	0.105	0.535	-0.025	0.066	0.975	(0.857-1.11)	0.707
rs140747460	16p13.3	1345045	G	T	0.03	0.465	0.046	0.125	1.047	(0.82-1.338)	0.715
rs7195339	16p13.3	1371542	T	C	0.891	0.963	-0.017	0.048	0.983	(0.895-1.08)	0.717
rs118110600	16p13.3	1369419	C	G	0.026	0.83	-0.036	0.101	0.965	(0.791-1.176)	0.721
rs35264734	16p13.3	1344660	C	G	0.076	0.89	0.021	0.058	1.021	(0.911-1.144)	0.722
rs2092388	16p13.3	1345109	A	G	0.076	0.891	0.02	0.058	1.02	(0.911-1.143)	0.723
rs76435359	16p13.3	1388330	G	C	0.026	0.62	0.041	0.115	1.042	(0.832-1.305)	0.724
rs183037640	16p13.3	1395614	A	C	0.12	0.556	0.021	0.06	1.021	(0.908-1.149)	0.725
rs6600135	16p13.3	1362199	G	A	0.892	0.964	-0.017	0.048	0.983	(0.895-1.08)	0.727
rs2401950	16p13.3	1346875	G	A	0.076	0.895	0.02	0.057	1.02	(0.912-1.141)	0.728
rs185060782	16p13.3	1383750	G	A	0.018	0.666	0.046	0.132	1.047	(0.808-1.356)	0.729
rs148460222	16p13.3	1409692	C	T	0.014	0.438	-0.064	0.192	0.938	(0.644-1.367)	0.738
rs1061497	16p13.3	1415331	C	T	0.839	0.843	-0.014	0.043	0.986	(0.906-1.073)	0.74
rs148421898	16p13.3	1335938	G	T	0.017	0.658	-0.046	0.139	0.955	(0.727-1.254)	0.742
rs147942722	16p13.3	1354891	C	T	0.066	0.792	-0.022	0.067	0.978	(0.858-1.116)	0.742
rs8048759	16p13.3	1378788	C	T	0.55	0.672	0.012	0.036	1.012	(0.943-1.086)	0.744
rs112377811	16p13.3	1395420	C	T	0.077	0.536	-0.025	0.076	0.975	(0.84-1.132)	0.744
rs12930585	16p13.3	1357511	A	G	0.893	0.936	-0.016	0.048	0.984	(0.896-1.081)	0.745
rs113424510	16p13.3	1331222	T	C	0.171	0.698	0.015	0.047	1.015	(0.926-1.113)	0.748
rs28525444	16p13.3	1420813	A	G	0.024	0.79	0.034	0.108	1.035	(0.837-1.278)	0.751
chr16:1395400:D	16p13.3	1395400	CTG	C	0.038	0.797	0.027	0.085	1.027	(0.87-1.214)	0.751
rs4984793	16p13.3	1322981	G	A	0.361	0.488	-0.014	0.044	0.986	(0.905-1.075)	0.751
rs192813507	16p13.3	1387786	C	A	0.007	0.569	0.071	0.226	1.074	(0.689-1.672)	0.752
rs11865640	16p13.3	1415299	G	A	0.02	0.676	0.04	0.125	1.041	(0.815-1.33)	0.753
rs12935781	16p13.3	1328432	A	T	0.554	0.531	-0.013	0.04	0.987	(0.913-1.068)	0.755
rs116106398	16p13.3	1388672	C	T	0.007	0.461	-0.082	0.264	0.921	(0.549-1.546)	0.755
rs742460	16p13.3	1405537	C	T	0.315	0.621	-0.012	0.04	0.988	(0.914-1.069)	0.756
rs79927246	16p13.3	1330037	C	T	0.014	0.473	0.056	0.18	1.058	(0.743-1.505)	0.756
chr16:1338921:D	16p13.3	1338921	GT	G	0.018	0.602	-0.044	0.141	0.957	(0.726-1.262)	0.756
rs12149300	16p13.3	1327843	A	G	0.361	0.507	-0.013	0.043	0.987	(0.907-1.074)	0.758
rs1883557	16p13.3	1322248	T	C	0.361	0.487	-0.013	0.044	0.987	(0.906-1.076)	0.763
rs8051743	16p13.3	1369159	T	C	0.892	0.976	-0.014	0.047	0.986	(0.899-1.081)	0.764
rs11641869	16p13.3	1326879	A	T	0.146	0.538	0.017	0.056	1.017	(0.911-1.135)	0.766
rs1883558	16p13.3	1326381	C	T	0.359	0.493	-0.013	0.043	0.987	(0.907-1.074)	0.767
rs13338616	16p13.3	1388416	T	C	0.853	0.689	0.015	0.05	1.015	(0.92-1.12)	0.768
rs35336536	16p13.3	1323016	T	C	0.154	0.595	0.015	0.053	1.015	(0.915-1.126)	0.774
rs149689600	16p13.3	1414609	G	A	0.007	0.363	-0.084	0.294	0.919	(0.517-1.636)	0.775
rs6600128	16p13.3	1350644	T	C	0.897	0.932	-0.014	0.05	0.986	(0.894-1.088)	0.776
rs35060045	16p13.3	1327322	G	A	0.157	0.581	-0.015	0.053	0.985	(0.888-1.093)	0.776
rs1962736	16p13.3	1325971	G	A	0.517	0.503	-0.011	0.041	0.989	(0.913-1.072)	0.785
rs6600130	16p13.3	1354720	C	G	0.889	0.909	-0.013	0.048	0.987	(0.898-1.084)	0.786
rs116779417	16p13.3	1372628	T	A	0.107	0.975	0.013	0.048	1.013	(0.922-1.113)	0.79
rs73500280	16p13.3	1350008	G	A	0.032	0.447	-0.033	0.124	0.968	(0.759-1.234)	0.791
rs35710332	16p13.3	1332072	T	C	0.123	0.754	-0.013	0.051	0.987	(0.893-1.091)	0.792
rs34164153	16p13.3	1331902	T	C	0.123	0.754	-0.013	0.051	0.987	(0.893-1.091)	0.792
rs114871548	16p13.3	1372660	C	T	0.107	0.973	0.013	0.048	1.013	(0.922-1.113)	0.793
rs117999299	16p13.3	1341137	G	A	0.032	0.548	0.029	0.111	1.029	(0.828-1.28)	0.793
rs139136481	16p13.3	1406974	G	C	0.007	0.558	-0.063	0.24	0.939	(0.587-1.503)	0.793
rs8057707	16p13.3	1327434	C	G	0.358	0.503	-0.011	0.043	0.989	(0.909-1.076)	0.794
rs77551033	16p13.3	1380362	G	A	0.053	0.766	-0.019	0.075	0.981	(0.847-1.137)	0.796
rs2072987	16p13.3	1412005	C	T	0.039	0.439	0.029	0.113	1.029	(0.825-1.285)	0.797
rs145642207	16p13.3	1342378	C	T	0.039	0.548	0.026	0.102	1.026	(0.84-1.253)	0.8
rs17135316	16p13.3	1335621	C	G	0.127	0.748	-0.013	0.05	0.987	(0.895-1.089)	0.802
rs17807841	16p13.3	1332721	C	G	0.123	0.755	-0.013	0.051	0.987	(0.893-1.091)	0.803
rs12595864	16p13.3	1386603	C	T	0.4	0.629	-0.009	0.038	0.991	(0.92-1.068)	0.803
rs113973129	16p13.3	1372804	C	T	0.028	0.48	-0.031	0.128	0.969	(0.754-1.246)	0.808
rs6600136	16p13.3	1388093	C	G	0.891	0.752	-0.013	0.054	0.987	(0.888-1.097)	0.808
rs181010725	16p13.3	1371745	C	T	0.006	0.456	0.066	0.272	1.068	(0.627-1.82)	0.809
rs4984823	16p13.3	1417408	T	C	0.893	0.888	0.012	0.05	1.012	(0.918-1.116)	0.811
chr16:1385463:I	16p13.3	1385463	C	CG	0.406	0.63	-0.009	0.038	0.991	(0.92-1.068)	0.812
rs4984818	16p13.3	1403598	C	T	0.891	0.877	0.012	0.05	1.012	(0.918-1.116)	0.814
rs742461	16p13.3	1405664	T	C	0.891	0.876	0.012	0.05	1.012	(0.918-1.116)	0.816
rs8055458	16p13.3	1323389	A	C	0.362	0.488	-0.01	0.044	0.99	(0.908-1.079)	0.816
rs35903896	16p13.3	1395169	C	T	0.038	0.802	0.02	0.086	1.02	(0.862-1.208)	0.817
rs144836546	16p13.3	1373104	C	T	0.09	0.893	0.012	0.054	1.012	(0.91-1.125)	0.817
rs17135320	16p13.3	1367314	G	C	0.104	1	0.011	0.048	1.011	(0.92-1.111)	0.818
rs8060254	16p13.3	1323539	T	C	0.362	0.488	-0.01	0.044	0.99	(0.908-1.079)	0.822
rs4984795	16p13.3	1323285	T	C	0.362	0.488	-0.01	0.044	0.99	(0.908-1.079)	0.822
rs10903002	16p13.3	1324459	G	C	0.553	0.494	0.009	0.042	1.009	(0.929-1.096)	0.824
rs4984814	16p13.3	1385650	A	C	0.433	0.612	0.008	0.038	1.008	(0.936-1.086)	0.826
rs10903003	16p13.3	1324466	C	T	0.361	0.485	-0.01	0.044	0.99	(0.908-1.079)	0.828
rs11862246	16p13.3	1419691	G	A	0.893	0.892	0.011	0.05	1.011	(0.917-1.115)	0.828
chr16:1371422:D	16p13.3	1371422	GCTGAGGGGT	G	0.868	0.897	-0.01	0.045	0.99	(0.906-1.081)	0.828
rs1811835	16p13.3	1379555	T	C	0.886	0.916	-0.01	0.048	0.99	(0.901-1.088)	0.828
chr16:1414668:D	16p13.3	1414668	TG	T	0.902	0.853	-0.011	0.053	0.989	(0.891-1.097)	0.83
rs67090011	16p13.3	1321567	C	T	0.361	0.488	-0.009	0.044	0.991	(0.909-1.08)	0.836
rs113064632	16p13.3	1377420	C	T	0.056	0.533	0.018	0.088	1.018	(0.857-1.21)	0.836
rs34832920	16p13.3	1418241	G	A	0.86	0.845	-0.009	0.046	0.991	(0.906-1.085)	0.84
rs11641079	16p13.3	1380652	C	A	0.435	0.62	0.008	0.038	1.008	(0.936-1.086)	0.842
chr16:1324541:D	16p13.3	1324541	GC	G	0.356	0.482	-0.009	0.044	0.991	(0.909-1.08)	0.843
rs11640768	16p13.3	1380682	G	A	0.435	0.62	0.008	0.038	1.008	(0.936-1.086)	0.843
rs144465246	16p13.3	1386599	C	T	0.063	0.762	-0.014	0.069	0.986	(0.861-1.129)	0.844
rs7195012	16p13.3	1381072	G	A	0.435	0.619	0.007	0.038	1.007	(0.935-1.085)	0.844
rs34361866	16p13.3	1340632	G	A	0.092	0.852	0.011	0.055	1.011	(0.908-1.126)	0.845
rs117119020	16p13.3	1382690	G	A	0.007	0.505	-0.049	0.251	0.952	(0.582-1.557)	0.846
chr16:1328514:I	16p13.3	1328514	T	TGAG	0.525	0.519	-0.008	0.041	0.992	(0.915-1.075)	0.846
rs116145925	16p13.3	1368455	C	T	0.104	0.992	0.009	0.048	1.009	(0.918-1.109)	0.847
rs73500239	16p13.3	1332341	G	C	0.127	0.746	-0.01	0.051	0.99	(0.896-1.094)	0.851
rs11646485	16p13.3	1326884	G	A	0.146	0.555	-0.01	0.056	0.99	(0.887-1.105)	0.856
rs3759936	16p13.3	1381680	G	A	0.434	0.618	0.007	0.038	1.007	(0.935-1.085)	0.857
rs79005361	16p13.3	1370682	G	A	0.104	0.991	0.009	0.048	1.009	(0.918-1.109)	0.857
rs11248872	16p13.3	1394551	A	G	0.902	0.851	0.01	0.053	1.01	(0.91-1.121)	0.857
rs9328917	16p13.3	1357226	G	A	0.896	0.944	-0.009	0.049	0.991	(0.9-1.091)	0.857
rs4984804	16p13.3	1356683	C	T	0.896	0.944	-0.009	0.049	0.991	(0.9-1.091)	0.857
rs6600129	16p13.3	1353857	T	C	0.896	0.943	-0.009	0.049	0.991	(0.9-1.091)	0.859
rs7202933	16p13.3	1354438	C	A	0.896	0.943	-0.009	0.049	0.991	(0.9-1.091)	0.859
rs7197416	16p13.3	1388888	C	T	0.902	0.847	0.009	0.054	1.009	(0.908-1.122)	0.862
rs4984820	16p13.3	1407809	T	C	0.923	0.847	0.01	0.059	1.01	(0.9-1.134)	0.868
rs181788750	16p13.3	1408959	C	T	0.034	0.55	-0.017	0.108	0.983	(0.796-1.215)	0.873
chr16:1349570:I	16p13.3	1349570	A	AC	0.007	0.466	-0.04	0.256	0.961	(0.582-1.587)	0.875
rs117658255	16p13.3	1414618	C	T	0.008	0.425	0.04	0.257	1.041	(0.629-1.722)	0.878
rs1132356	16p13.3	1394507	A	C	0.901	0.853	0.008	0.053	1.008	(0.909-1.118)	0.88
rs7201634	16p13.3	1385866	A	G	0.912	0.88	-0.008	0.055	0.992	(0.891-1.105)	0.885
rs3759937	16p13.3	1381917	C	A	0.145	0.57	-0.008	0.055	0.992	(0.891-1.105)	0.887
rs113679925	16p13.3	1328437	G	C	0.081	0.541	-0.01	0.073	0.99	(0.858-1.142)	0.889
chr16:1371223:D	16p13.3	1371223	AC	A	0.881	0.917	-0.006	0.047	0.994	(0.907-1.09)	0.89
rs112543345	16p13.3	1367206	C	T	0.054	0.878	0.01	0.069	1.01	(0.882-1.156)	0.891
rs78931180	16p13.3	1367680	G	A	0.054	0.879	0.01	0.069	1.01	(0.882-1.156)	0.891
rs116678909	16p13.3	1420638	C	T	0.015	0.743	-0.019	0.138	0.981	(0.749-1.286)	0.892
rs11248864	16p13.3	1353515	T	C	0.882	0.9	-0.006	0.047	0.994	(0.907-1.09)	0.893
rs2369699	16p13.3	1391871	C	G	0.441	0.618	-0.005	0.038	0.995	(0.924-1.072)	0.893
rs11644706	16p13.3	1358917	A	T	0.883	0.887	-0.006	0.048	0.994	(0.905-1.092)	0.895
rs5016389	16p13.3	1395593	C	A	0.128	0.487	-0.008	0.062	0.992	(0.879-1.12)	0.896
rs62641042	16p13.3	1358426	G	A	0.214	0.475	0.006	0.052	1.006	(0.909-1.114)	0.903
rs7185635	16p13.3	1383327	G	A	0.443	0.618	0.005	0.038	1.005	(0.933-1.083)	0.904
rs11248862	16p13.3	1344291	A	G	0.901	0.912	-0.006	0.051	0.994	(0.899-1.099)	0.906
rs143421795	16p13.3	1391086	G	C	0.006	0.405	0.033	0.286	1.034	(0.59-1.81)	0.909
rs146279538	16p13.3	1416847	C	T	0.008	0.56	0.026	0.225	1.026	(0.66-1.595)	0.909
rs61742684	16p13.3	1389222	C	T	0.062	0.757	-0.008	0.07	0.992	(0.865-1.138)	0.911
rs9933940	16p13.3	1322110	A	G	0.699	0.503	0.005	0.045	1.005	(0.92-1.098)	0.911
rs11645809	16p13.3	1358976	T	A	0.88	0.904	0.005	0.047	1.005	(0.917-1.102)	0.912
rs113718708	16p13.3	1380703	C	T	0.076	0.532	0.008	0.076	1.008	(0.869-1.17)	0.915
rs113501236	16p13.3	1381125	G	A	0.076	0.532	0.008	0.076	1.008	(0.869-1.17)	0.917
rs9923479	16p13.3	1322132	C	G	0.699	0.503	0.005	0.045	1.005	(0.92-1.098)	0.92
rs117520248	16p13.3	1374577	C	T	0.032	0.762	-0.009	0.095	0.991	(0.823-1.194)	0.921
rs4984794	16p13.3	1323096	A	G	0.698	0.503	0.004	0.045	1.004	(0.919-1.097)	0.922
rs139376246	16p13.3	1331733	C	T	0.008	0.457	-0.022	0.232	0.978	(0.621-1.541)	0.924
rs112923052	16p13.3	1330081	G	A	0.074	0.612	0.007	0.072	1.007	(0.874-1.16)	0.926
rs113016123	16p13.3	1331231	A	G	0.078	0.592	-0.007	0.071	0.993	(0.864-1.141)	0.927
rs113000595	16p13.3	1321833	C	T	0.178	0.479	-0.005	0.055	0.995	(0.893-1.108)	0.931
rs79019482	16p13.3	1349889	G	C	0.113	0.483	-0.006	0.067	0.994	(0.872-1.134)	0.932
rs111589071	16p13.3	1367462	A	G	0.054	0.874	0.006	0.069	1.006	(0.879-1.152)	0.932
rs11248874	16p13.3	1419947	A	G	0.923	0.854	0.005	0.059	1.005	(0.895-1.128)	0.934
rs111931396	16p13.3	1330238	A	C	0.074	0.612	0.006	0.072	1.006	(0.874-1.158)	0.934
rs56171311	16p13.3	1419305	G	A	0.868	0.861	0.003	0.046	1.003	(0.917-1.098)	0.947
rs1610294	16p13.3	1323781	T	C	0.703	0.502	0.003	0.046	1.003	(0.917-1.098)	0.95
rs9923916	16p13.3	1322605	C	T	0.177	0.481	-0.003	0.055	0.997	(0.895-1.11)	0.95
rs142601738	16p13.3	1409744	C	T	0.027	0.45	0.008	0.135	1.008	(0.774-1.313)	0.952
rs7202563	16p13.3	1389153	C	A	0.919	0.828	-0.003	0.059	0.997	(0.888-1.119)	0.956
rs117492134	16p13.3	1329753	G	A	0.038	0.61	0.005	0.097	1.005	(0.831-1.215)	0.956
rs9597	16p13.3	1374951	C	G	0.035	0.535	-0.005	0.11	0.995	(0.802-1.234)	0.963
rs9922819	16p13.3	1383502	A	G	0.98	0.472	0.006	0.151	1.006	(0.748-1.352)	0.968
rs117651146	16p13.3	1362481	C	T	0.007	0.465	-0.01	0.258	0.99	(0.597-1.642)	0.968
rs55637159	16p13.3	1419321	G	A	0.869	0.866	0.001	0.046	1.001	(0.915-1.095)	0.977
rs116345826	16p13.3	1413427	G	A	0.123	0.722	-0.001	0.053	0.999	(0.9-1.108)	0.979
rs4984815	16p13.3	1386728	T	C	0.909	0.87	0.001	0.055	1.001	(0.899-1.115)	0.981
rs141406317	16p13.3	1379415	G	A	0.007	0.544	0.004	0.23	1.004	(0.64-1.576)	0.985
rs192209428	16p13.3	1338451	G	A	0.007	0.686	-0.004	0.209	0.996	(0.661-1.5)	0.986
rs4984796	16p13.3	1329427	G	C	0.781	0.537	0.001	0.048	1.001	(0.911-1.1)	0.99
rs112696038	16p13.3	1385756	C	T	0.076	0.531	0	0.076	1	(0.862-1.161)	0.997
