# Supplementary material for: Association of breast cancer risk in BRCA1 and BRCA2 mutation carriers with genetic variants showing differential allelic expression: identification of a modifier of breast cancer risk at locus 11q22.3
Source: Breast Cancer Res Treat. 2016 Oct 28;161(1):117–34. doi: 10.1007/s10549-016-4018-2 (PMC5222911; doi:10.1007/s10549-016-4018-2)
Supplement: Supplementary file 7 — Supplementary material 7 (XLSX 180 kb) [file 10549_2016_4018_MOESM7_ESM.xlsx]

## Sheet: eQTL_BC_241
Online Resource 7a. 11q22.3 eQTL SNPs from BC241 breast tumour dataset
Gene	ePosition	SNP	mPosition	N	P-value	r2
SLC35F2	107695815	rs181187590	108032233	237	1.38e-05	0.0774401
SLC35F2	107695815	rs186400268	108016730	236	1.44e-05	0.0774108
ELMOD1	1.075e+08	rs181187590	108032233	237	0.000134	0.060327
ELMOD1	1.075e+08	rs186400268	108016730	236	0.000139	0.0602523
SLC35F2	107695815	rs3218674	108115587	241	0.000149	0.0585065
SLC35F2	107695815	rs79866170	108099374	240	0.000171	0.0577206
EXPH5	1.0842e+08	rs181187590	108032233	237	0.000296	0.0543031
EXPH5	1.0842e+08	rs186400268	108016730	236	0.000304	0.0543391
ATM	108166692	rs4987915	108113564	240	0.000371	0.0519628
ATM	108166692	rs4988037	108172998	241	0.000379	0.0515911
EXPH5	1.0842e+08	rs141518244	108033830	237	0.000651	0.0483557
EXPH5	1.0842e+08	rs3218674	108115587	241	0.00125	0.0427517
C11orf65	108295992	rs592955	108156473	237	0.00139	0.0426256
ATM	108166692	rs35303872	108032707	239	0.00143	0.0420798
C11orf65	108295992	rs582157	108161202	240	0.00164	0.0408834
EXPH5	1.0842e+08	rs79866170	108099374	240	0.00202	0.0393387
C11orf65	108295992	chr11:108055259:I	108055259	233	0.00222	0.0397965
C11orf65	108295992	rs627418	108131225	239	0.0024	0.0382001
C11orf65	108295992	rs1003623	108152582	241	0.0024	0.0378887
C11orf65	108295992	rs1003624	108152645	241	0.0024	0.0378887
C11orf65	108295992	rs624366	108154097	241	0.0024	0.0378887
C11orf65	108295992	rs654005	108155397	241	0.0024	0.0378887
C11orf65	108295992	rs609261	108158134	241	0.0024	0.0378887
C11orf65	108295992	rs600329	108163733	241	0.0024	0.0378887
C11orf65	108295992	rs583725	108165075	241	0.0024	0.0378887
C11orf65	108295992	chr11:108166958:D	108166958	241	0.0024	0.0378887
C11orf65	108295992	rs645485	108168863	241	0.0024	0.0378887
C11orf65	108295992	rs619972	108169619	241	0.0024	0.0378887
C11orf65	108295992	rs1150203	108170271	241	0.0024	0.0378887
C11orf65	108295992	rs637064	108140909	240	0.00247	0.0378551
C11orf65	108295992	rs11212579	108150664	240	0.00247	0.0378551
C11orf65	108295992	chr11:108111429:D	108111429	240	0.00257	0.0375556
C11orf65	108295992	rs228588	108113331	240	0.00257	0.0375556
C11orf65	108295992	rs694376	108119048	240	0.00257	0.0375556
C11orf65	108295992	rs599164	108120439	240	0.00257	0.0375556
C11orf65	108295992	rs1973723	108033955	239	0.00266	0.0374618
C11orf65	108295992	rs647681	108161252	241	0.0029	0.0364962
C11orf65	108295992	rs621947	108165219	241	0.0029	0.0364962
C11orf65	108295992	chr11:108075271:D	108075271	232	0.00295	0.0377898
C11orf65	108295992	rs664677	108143182	240	0.00298	0.0364411
C11orf65	108295992	rs618499	108148839	240	0.00298	0.0364411
C11orf65	108295992	rs4987982	108151269	240	0.00298	0.0364411
C11orf65	108295992	rs641312	108148265	239	0.00311	0.0362837
C11orf65	108295992	rs601111	108159356	236	0.00312	0.0367159
C11orf65	108295992	rs10890821	108022061	237	0.00321	0.0363521
C11orf65	108295992	rs12575358	108022234	237	0.00321	0.0363521
C11orf65	108295992	rs4754298	108023284	237	0.00321	0.0363521
C11orf65	108295992	rs10789656	108024336	234	0.00333	0.0365449
C11orf65	108295992	rs172927	108124299	240	0.00343	0.0354102
C11orf65	108295992	rs672964	108125471	240	0.00343	0.0354102
C11orf65	108295992	rs672655	108129657	240	0.00343	0.0354102
C11orf65	108295992	chr11:108031294:D	108031294	237	0.00347	0.0357748
EXPH5	1.0842e+08	rs592955	108156473	237	0.0035	0.0357115
C11orf65	108295992	chr11:108029109:I	108029109	239	0.00355	0.035303
C11orf65	108295992	rs11212538	108045956	240	0.00361	0.0350465
C11orf65	108295992	rs4754301	108048541	240	0.00361	0.0350465
C11orf65	108295992	rs1850730	108051112	240	0.00361	0.0350465
C11orf65	108295992	rs4623864	108051300	240	0.00361	0.0350465
C11orf65	108295992	rs11212543	108054922	240	0.00361	0.0350465
C11orf65	108295992	rs4753833	108057430	240	0.00361	0.0350465
C11orf65	108295992	rs3781869	108059000	240	0.00361	0.0350465
C11orf65	108295992	rs3781868	108059569	240	0.00361	0.0350465
C11orf65	108295992	rs4754305	108075912	240	0.00361	0.0350465
C11orf65	108295992	rs11605442	108077857	240	0.00361	0.0350465
C11orf65	108295992	rs228597	108107009	240	0.00361	0.0350465
C11orf65	108295992	rs694799	108119366	240	0.00361	0.0350465
C11orf65	108295992	rs11212546	108064935	241	0.00362	0.0348621
C11orf65	108295992	rs609557	108084513	241	0.00362	0.0348621
C11orf65	108295992	rs183460	108090710	241	0.00362	0.0348621
C11orf65	108295992	rs189037	108093833	241	0.00362	0.0348621
C11orf65	108295992	rs625120	108095220	241	0.00362	0.0348621
C11orf65	108295992	rs228590	108096141	241	0.00362	0.0348621
C11orf65	108295992	rs228591	108097333	241	0.00362	0.0348621
C11orf65	108295992	rs228596	108105928	241	0.00362	0.0348621
C11orf65	108295992	rs228598	108107497	241	0.00362	0.0348621
C11orf65	108295992	rs600931	108117335	241	0.00362	0.0348621
C11orf65	108295992	rs599406	108118234	241	0.00362	0.0348621
C11orf65	108295992	rs600691	108118479	241	0.00362	0.0348621
C11orf65	108295992	rs228592	108123189	241	0.00362	0.0348621
C11orf65	108295992	rs641605	108101919	240	0.00381	0.0346355
C11orf65	108295992	rs228589	108093208	241	0.00385	0.0344176
C11orf65	108295992	chr11:108145072:D	108145072	232	0.00386	0.0357162
C11orf65	108295992	rs642496	108137775	239	0.0042	0.0340606
C11orf65	108295992	rs4754299	108025214	240	0.00428	0.033785
C11orf65	108295992	rs12787445	108034124	240	0.00428	0.033785
C11orf65	108295992	rs2070661	108043988	241	0.00436	0.0335117
C11orf65	108295992	rs1893813	108054604	241	0.00436	0.0335117
C11orf65	108295992	rs7118967	108057856	241	0.00436	0.0335117
C11orf65	108295992	rs2056267	108061808	241	0.00436	0.0335117
C11orf65	108295992	rs2083707	108066130	241	0.00436	0.0335117
C11orf65	108295992	rs1607476	108075161	241	0.00436	0.0335117
C11orf65	108295992	rs12272183	108077181	241	0.00436	0.0335117
C11orf65	108295992	rs228607	108088493	241	0.00436	0.0335117
C11orf65	108295992	rs183459	108089197	241	0.00436	0.0335117
C11orf65	108295992	rs228594	108104525	241	0.00436	0.0335117
C11orf65	108295992	rs623860	108106782	241	0.00436	0.0335117
C11orf65	108295992	rs228599	108107660	241	0.00436	0.0335117
C11orf65	108295992	rs679782	108116700	241	0.00436	0.0335117
C11orf65	108295992	rs4027718	108065708	236	0.00455	0.0338962
C11orf65	108295992	rs661467	108101492	240	0.00458	0.0332827
C11orf65	108295992	rs228601	108132445	233	0.00471	0.0340588
ACAT1	108005574	rs77376169	108085808	236	0.00479	0.0334972
C11orf65	108295992	chr11:108067234:D	108067234	235	0.0048	0.0336241
C11orf65	108295992	rs594153	108131646	237	0.00517	0.0327865
C11orf65	108295992	rs6589007	108040104	241	0.00605	0.031106
C11orf65	108295992	rs7395528	108056708	241	0.00605	0.031106
C11orf65	108295992	rs11212551	108078693	241	0.00605	0.031106
C11orf65	108295992	rs228608	108088900	241	0.00605	0.031106
EXPH5	1.0842e+08	rs145904821	108009211	236	0.00625	0.0315171
C11orf65	108295992	rs80078892	108165407	229	0.00722	0.0313633
NPAT	1.08061e+08	rs11212524	108014088	239	0.00892	0.0285014
NPAT	1.08061e+08	rs10890817	108006047	238	0.00958	0.0280987
NPAT	1.08061e+08	rs10789655	108011857	238	0.00958	0.0280987
EXPH5	1.0842e+08	rs582157	108161202	240	0.00962	0.0278294
CUL5	1.07929e+08	rs7926222	108008302	239	0.0103	0.0274689
CUL5	1.07929e+08	rs10789654	108009381	239	0.0103	0.0274689
CUL5	1.07929e+08	rs10749914	108012077	239	0.0103	0.0274689
CUL5	1.07929e+08	rs1550608	108006466	235	0.0104	0.0278259
CUL5	1.07929e+08	rs10890814	107991611	239	0.0105	0.0272813
CUL5	1.07929e+08	rs2356518	107999603	239	0.0105	0.0272813
CUL5	1.07929e+08	rs10890815	108001621	239	0.0105	0.0272813
EXPH5	1.0842e+08	rs620815	108148332	241	0.0106	0.0269997
EXPH5	1.0842e+08	rs3741049	108009927	241	0.0114	0.0264924
EXPH5	1.0842e+08	rs637064	108140909	240	0.0114	0.0265809
EXPH5	1.0842e+08	rs11212579	108150664	240	0.0114	0.0265809
EXPH5	1.0842e+08	rs1003623	108152582	241	0.0115	0.0264171
EXPH5	1.0842e+08	rs1003624	108152645	241	0.0115	0.0264171
EXPH5	1.0842e+08	rs624366	108154097	241	0.0115	0.0264171
EXPH5	1.0842e+08	rs654005	108155397	241	0.0115	0.0264171
EXPH5	1.0842e+08	rs609261	108158134	241	0.0115	0.0264171
EXPH5	1.0842e+08	rs600329	108163733	241	0.0115	0.0264171
EXPH5	1.0842e+08	rs583725	108165075	241	0.0115	0.0264171
EXPH5	1.0842e+08	chr11:108166958:D	108166958	241	0.0115	0.0264171
EXPH5	1.0842e+08	rs645485	108168863	241	0.0115	0.0264171
EXPH5	1.0842e+08	rs619972	108169619	241	0.0115	0.0264171
EXPH5	1.0842e+08	rs1150203	108170271	241	0.0115	0.0264171
CUL5	1.07929e+08	rs10890817	108006047	238	0.0118	0.0265713
CUL5	1.07929e+08	rs10789655	108011857	238	0.0118	0.0265713
ATM	108166692	rs10789656	108024336	234	0.0118	0.0269926
EXPH5	1.0842e+08	rs1973723	108033955	239	0.0118	0.0264302
EXPH5	1.0842e+08	chr11:108029109:I	108029109	239	0.0121	0.0262542
CUL5	1.07929e+08	rs10890816	108001714	235	0.0125	0.026461
CUL5	1.07929e+08	rs7123836	107995903	238	0.0126	0.0260812
ELMOD1	1.075e+08	rs79866170	108099374	240	0.0127	0.0258039
EXPH5	1.0842e+08	chr11:108145072:D	108145072	232	0.0127	0.0267187
NPAT	1.08061e+08	rs7123836	107995903	238	0.0129	0.0259204
NPAT	1.08061e+08	rs1550608	108006466	235	0.0129	0.0262454
EXPH5	1.0842e+08	rs4027718	108065708	236	0.013	0.0260997
NPAT	1.08061e+08	rs10890816	108001714	235	0.0131	0.0261518
EXPH5	1.0842e+08	rs75150151	108028984	240	0.0131	0.0256045
EXPH5	1.0842e+08	rs80078892	108165407	229	0.0131	0.0268078
EXPH5	1.0842e+08	chr11:108075271:D	108075271	232	0.0132	0.0264303
CUL5	1.07929e+08	rs12361905	108015769	239	0.0133	0.0255896
NPAT	1.08061e+08	rs7926222	108008302	239	0.0137	0.0253491
NPAT	1.08061e+08	rs10789654	108009381	239	0.0137	0.0253491
NPAT	1.08061e+08	rs10749914	108012077	239	0.0137	0.0253491
EXPH5	1.0842e+08	rs10789656	108024336	234	0.0137	0.025914
EXPH5	1.0842e+08	rs228589	108093208	241	0.014	0.0249952
ALKBH8	1.07405e+08	rs186400268	108016730	236	0.0144	0.0253127
ALKBH8	1.07405e+08	rs181187590	108032233	237	0.0144	0.0251915
CUL5	1.07929e+08	rs11212524	108014088	239	0.0145	0.0249682
NPAT	1.08061e+08	rs117813661	108126353	240	0.0149	0.0246621
EXPH5	1.0842e+08	rs172927	108124299	240	0.0149	0.0246381
EXPH5	1.0842e+08	rs672964	108125471	240	0.0149	0.0246381
EXPH5	1.0842e+08	rs672655	108129657	240	0.0149	0.0246381
ACAT1	108005574	rs3741055	107992325	239	0.0152	0.024599
ACAT1	108005574	rs3741056	107992346	239	0.0152	0.024599
ACAT1	108005574	rs7114794	107993500	239	0.0152	0.024599
ACAT1	108005574	rs11212515	107997465	239	0.0152	0.024599
ACAT1	108005574	rs11607588	108006156	234	0.0153	0.0250667
EXPH5	1.0842e+08	rs11212546	108064935	241	0.0154	0.0243305
EXPH5	1.0842e+08	rs609557	108084513	241	0.0154	0.0243305
EXPH5	1.0842e+08	rs183460	108090710	241	0.0154	0.0243305
EXPH5	1.0842e+08	rs189037	108093833	241	0.0154	0.0243305
EXPH5	1.0842e+08	rs625120	108095220	241	0.0154	0.0243305
EXPH5	1.0842e+08	rs228590	108096141	241	0.0154	0.0243305
EXPH5	1.0842e+08	rs228591	108097333	241	0.0154	0.0243305
EXPH5	1.0842e+08	rs228596	108105928	241	0.0154	0.0243305
EXPH5	1.0842e+08	rs228598	108107497	241	0.0154	0.0243305
EXPH5	1.0842e+08	rs600931	108117335	241	0.0154	0.0243305
EXPH5	1.0842e+08	rs599406	108118234	241	0.0154	0.0243305
EXPH5	1.0842e+08	rs600691	108118479	241	0.0154	0.0243305
EXPH5	1.0842e+08	rs228592	108123189	241	0.0154	0.0243305
EXPH5	1.0842e+08	rs11212538	108045956	240	0.0156	0.0243023
EXPH5	1.0842e+08	rs4754301	108048541	240	0.0156	0.0243023
EXPH5	1.0842e+08	rs1850730	108051112	240	0.0156	0.0243023
EXPH5	1.0842e+08	rs4623864	108051300	240	0.0156	0.0243023
EXPH5	1.0842e+08	rs11212543	108054922	240	0.0156	0.0243023
EXPH5	1.0842e+08	rs4753833	108057430	240	0.0156	0.0243023
EXPH5	1.0842e+08	rs3781869	108059000	240	0.0156	0.0243023
EXPH5	1.0842e+08	rs3781868	108059569	240	0.0156	0.0243023
EXPH5	1.0842e+08	rs4754305	108075912	240	0.0156	0.0243023
EXPH5	1.0842e+08	rs11605442	108077857	240	0.0156	0.0243023
EXPH5	1.0842e+08	rs228597	108107009	240	0.0156	0.0243023
EXPH5	1.0842e+08	rs694799	108119366	240	0.0156	0.0243023
ACAT1	108005574	rs57149652	108052428	240	0.0158	0.0242342
ACAT1	108005574	rs77166385	108054082	240	0.0158	0.0242342
ATM	108166692	chr11:108075271:D	108075271	232	0.0158	0.0250809
NPAT	1.08061e+08	rs12361905	108015769	239	0.0159	0.0242938
NPAT	1.08061e+08	rs10890814	107991611	239	0.0162	0.0241573
NPAT	1.08061e+08	rs2356518	107999603	239	0.0162	0.0241573
NPAT	1.08061e+08	rs10890815	108001621	239	0.0162	0.0241573
EXPH5	1.0842e+08	rs6589004	108023745	233	0.0162	0.0247774
ACAT1	108005574	rs12419212	108060284	241	0.0163	0.0239241
ACAT1	108005574	rs74708928	108065252	241	0.0163	0.0239241
ACAT1	108005574	rs76110388	108090396	241	0.0163	0.0239241
ACAT1	108005574	rs4987876	108092637	241	0.0163	0.0239241
ACAT1	108005574	rs75305266	108114506	241	0.0163	0.0239241
ATM	108166692	rs4987886	108096053	235	0.0163	0.0245169
EXPH5	1.0842e+08	rs6589007	108040104	241	0.0169	0.023637
EXPH5	1.0842e+08	rs7395528	108056708	241	0.0169	0.023637
EXPH5	1.0842e+08	rs11212551	108078693	241	0.0169	0.023637
EXPH5	1.0842e+08	rs228608	108088900	241	0.0169	0.023637
EXPH5	1.0842e+08	chr11:108067234:D	108067234	235	0.017	0.0241941
C11orf65	108295992	rs12794010	108013361	240	0.0173	0.0235857
EXPH5	1.0842e+08	chr11:108055259:I	108055259	233	0.0175	0.0241883
NPAT	1.08061e+08	rs4754300	108039042	239	0.0177	0.0234979
NPAT	1.08061e+08	rs73006208	108041816	239	0.0177	0.0234979
NPAT	1.08061e+08	chr11:108047407:I	108047407	239	0.0177	0.0234979
NPAT	1.08061e+08	rs1519074	108047982	239	0.0177	0.0234979
EXPH5	1.0842e+08	rs601111	108159356	236	0.0177	0.023796
ACAT1	108005574	rs59021565	107999907	234	0.0178	0.0239757
CUL5	1.07929e+08	rs9666209	108011566	236	0.0179	0.0237227
C11orf65	108295992	rs1893812	108054500	233	0.0182	0.0238914
EXPH5	1.0842e+08	chr11:108031294:D	108031294	237	0.0184	0.0234375
ATM	108166692	rs594153	108131646	237	0.0187	0.0233076
ATM	108166692	chr11:108055259:I	108055259	233	0.0188	0.023648
EXPH5	1.0842e+08	rs683312	108068954	241	0.0188	0.0228666
EXPH5	1.0842e+08	rs228601	108132445	233	0.0189	0.0236356
ATM	108166692	rs627418	108131225	239	0.0193	0.0228899
ATM	108166692	chr11:108111429:D	108111429	240	0.0194	0.0227518
ATM	108166692	rs228588	108113331	240	0.0194	0.0227518
ATM	108166692	rs694376	108119048	240	0.0194	0.0227518
ATM	108166692	rs599164	108120439	240	0.0194	0.0227518
ATM	108166692	rs11607588	108006156	234	0.0195	0.023273
NPAT	1.08061e+08	rs111741588	108080583	234	0.0196	0.0232648
NPAT	1.08061e+08	rs73006241	108089151	241	0.0197	0.0225309
NPAT	1.08061e+08	rs55985317	108110663	241	0.0197	0.0225309
EXPH5	1.0842e+08	rs612706	108063530	240	0.0197	0.0226435
EXPH5	1.0842e+08	rs7129527	108044995	239	0.0206	0.0224224
EXPH5	1.0842e+08	rs641605	108101919	240	0.0206	0.0223022
NPAT	1.08061e+08	rs9666209	108011566	236	0.0208	0.022634
ACAT1	108005574	rs4144901	108044091	241	0.0211	0.0220429
ATM	108166692	rs4754299	108025214	240	0.0211	0.0221455
ATM	108166692	rs12787445	108034124	240	0.0211	0.0221455
ACAT1	108005574	rs12226047	108005215	239	0.0213	0.0221804
ATM	108166692	chr11:108031294:D	108031294	237	0.022	0.0221046
C11orf65	108295992	rs7931681	108004798	240	0.022	0.0218562
EXPH5	1.0842e+08	rs1800889	108163487	241	0.0221	0.0217347
ATM	108166692	rs189429673	108136040	234	0.0226	0.0221945
ACAT1	108005574	rs12226342	108005343	238	0.0227	0.0218063
EXPH5	1.0842e+08	rs10890821	108022061	237	0.0227	0.0218848
EXPH5	1.0842e+08	rs12575358	108022234	237	0.0227	0.0218848
EXPH5	1.0842e+08	rs4754298	108023284	237	0.0227	0.0218848
ATM	108166692	rs10890821	108022061	237	0.0229	0.0218319
ATM	108166692	rs12575358	108022234	237	0.0229	0.0218319
ATM	108166692	rs4754298	108023284	237	0.0229	0.0218319
C11orf65	108295992	rs11212525	108016014	241	0.0233	0.0213421
ATM	108166692	rs661467	108101492	240	0.0234	0.0214097
C11orf65	108295992	rs34971817	107997908	240	0.0237	0.0213212
ACAT1	108005574	rs12420555	108024050	237	0.0238	0.0215427
ACAT1	108005574	rs78243683	108031376	237	0.0238	0.0215427
EXPH5	1.0842e+08	rs664677	108143182	240	0.0241	0.0211964
EXPH5	1.0842e+08	rs618499	108148839	240	0.0241	0.0211964
EXPH5	1.0842e+08	rs4987982	108151269	240	0.0241	0.0211964
ACAT1	108005574	rs11212570	108130712	241	0.0242	0.0210816
ATM	108166692	chr11:108029109:I	108029109	239	0.0242	0.0212597
EXPH5	1.0842e+08	rs647681	108161252	241	0.0243	0.0210334
EXPH5	1.0842e+08	rs621947	108165219	241	0.0243	0.0210334
ATM	108166692	rs647681	108161252	241	0.0248	0.0208971
ATM	108166692	rs621947	108165219	241	0.0248	0.0208971
EXPH5	1.0842e+08	rs4754299	108025214	240	0.0252	0.0208783
EXPH5	1.0842e+08	rs12787445	108034124	240	0.0252	0.0208783
ATM	108166692	rs664677	108143182	240	0.0253	0.02083
ATM	108166692	rs618499	108148839	240	0.0253	0.02083
ATM	108166692	rs4987982	108151269	240	0.0253	0.02083
EXPH5	1.0842e+08	rs641312	108148265	239	0.0256	0.0208432
ELMOD1	1.075e+08	rs3092847	108094538	237	0.0257	0.0210006
ELMOD1	1.075e+08	rs4987980	108141454	237	0.0257	0.0210006
ELMOD1	1.075e+08	rs76053502	108155699	237	0.0257	0.0210006
ATM	108166692	rs641605	108101919	240	0.0267	0.0204673
ATM	108166692	rs76395038	108047119	238	0.0275	0.0204258
ATM	108166692	rs592955	108156473	237	0.0276	0.0204864
ACAT1	108005574	rs10890820	108014949	240	0.0279	0.0201527
EXPH5	1.0842e+08	rs1893812	108054500	233	0.028	0.02073
ATM	108166692	rs34971817	107997908	240	0.0281	0.0201084
EXPH5	1.0842e+08	rs228606	108087847	241	0.0281	0.0200179
EXPH5	1.0842e+08	chr11:108098459:D	108098459	241	0.0281	0.0200179
EXPH5	1.0842e+08	rs228595	108105593	241	0.0281	0.0200179
ATM	108166692	rs228589	108093208	241	0.0282	0.0200018
SLN	1.0758e+08	rs138610611	108055132	240	0.0283	0.0200478
ATM	108166692	rs2070661	108043988	241	0.0284	0.0199455
ATM	108166692	rs1893813	108054604	241	0.0284	0.0199455
ATM	108166692	rs7118967	108057856	241	0.0284	0.0199455
ATM	108166692	rs2056267	108061808	241	0.0284	0.0199455
ATM	108166692	rs2083707	108066130	241	0.0284	0.0199455
ATM	108166692	rs1607476	108075161	241	0.0284	0.0199455
ATM	108166692	rs12272183	108077181	241	0.0284	0.0199455
ATM	108166692	rs228607	108088493	241	0.0284	0.0199455
ATM	108166692	rs183459	108089197	241	0.0284	0.0199455
ATM	108166692	rs228594	108104525	241	0.0284	0.0199455
ATM	108166692	rs623860	108106782	241	0.0284	0.0199455
ATM	108166692	rs228599	108107660	241	0.0284	0.0199455
ATM	108166692	rs679782	108116700	241	0.0284	0.0199455
ATM	108166692	rs1003623	108152582	241	0.0284	0.0199295
ATM	108166692	rs1003624	108152645	241	0.0284	0.0199295
ATM	108166692	rs624366	108154097	241	0.0284	0.0199295
ATM	108166692	rs654005	108155397	241	0.0284	0.0199295
ATM	108166692	rs609261	108158134	241	0.0284	0.0199295
ATM	108166692	rs600329	108163733	241	0.0284	0.0199295
ATM	108166692	rs583725	108165075	241	0.0284	0.0199295
ATM	108166692	chr11:108166958:D	108166958	241	0.0284	0.0199295
ATM	108166692	rs645485	108168863	241	0.0284	0.0199295
ATM	108166692	rs619972	108169619	241	0.0284	0.0199295
ATM	108166692	rs1150203	108170271	241	0.0284	0.0199295
EXPH5	1.0842e+08	rs627418	108131225	239	0.0287	0.0200254
ATM	108166692	rs642496	108137775	239	0.0288	0.0200173
ATM	108166692	rs641312	108148265	239	0.0288	0.0200092
ATM	108166692	rs637064	108140909	240	0.0289	0.0198905
ATM	108166692	rs11212579	108150664	240	0.0289	0.0198905
ATM	108166692	rs651030	108141701	240	0.0292	0.0198339
EXPH5	1.0842e+08	rs651030	108141701	240	0.0292	0.0198299
EXPH5	1.0842e+08	chr11:108111429:D	108111429	240	0.0296	0.019729
EXPH5	1.0842e+08	rs228588	108113331	240	0.0296	0.019729
EXPH5	1.0842e+08	rs694376	108119048	240	0.0296	0.019729
EXPH5	1.0842e+08	rs599164	108120439	240	0.0296	0.019729
EXPH5	1.0842e+08	rs35422249	108010159	240	0.0297	0.0197048
NPAT	1.08061e+08	rs4753835	108145249	240	0.0299	0.0196603
NPAT	1.08061e+08	rs137896766	108146299	240	0.0299	0.0196603
NPAT	1.08061e+08	chr11:108150207:D	108150207	240	0.0299	0.0196603
ATM	108166692	rs228606	108087847	241	0.0301	0.0195234
ATM	108166692	chr11:108098459:D	108098459	241	0.0301	0.0195234
ATM	108166692	rs228595	108105593	241	0.0301	0.0195234
EXPH5	1.0842e+08	rs642496	108137775	239	0.0305	0.0196038
NPAT	1.08061e+08	rs3092991	108140516	241	0.0308	0.0193544
NPAT	1.08061e+08	rs4988023	108168995	241	0.0308	0.0193544
ACAT1	108005574	rs77376169	108085808	236	0.031	0.0197311
CUL5	1.07929e+08	rs138610611	108055132	240	0.0312	0.0193534
C11orf65	108295992	rs61913679	108010101	234	0.0316	0.0197611
EXPH5	1.0842e+08	rs2070661	108043988	241	0.0317	0.0191532
EXPH5	1.0842e+08	rs1893813	108054604	241	0.0317	0.0191532
EXPH5	1.0842e+08	rs7118967	108057856	241	0.0317	0.0191532
EXPH5	1.0842e+08	rs2056267	108061808	241	0.0317	0.0191532
EXPH5	1.0842e+08	rs2083707	108066130	241	0.0317	0.0191532
EXPH5	1.0842e+08	rs1607476	108075161	241	0.0317	0.0191532
EXPH5	1.0842e+08	rs12272183	108077181	241	0.0317	0.0191532
EXPH5	1.0842e+08	rs228607	108088493	241	0.0317	0.0191532
EXPH5	1.0842e+08	rs183459	108089197	241	0.0317	0.0191532
EXPH5	1.0842e+08	rs228594	108104525	241	0.0317	0.0191532
EXPH5	1.0842e+08	rs623860	108106782	241	0.0317	0.0191532
EXPH5	1.0842e+08	rs228599	108107660	241	0.0317	0.0191532
EXPH5	1.0842e+08	rs679782	108116700	241	0.0317	0.0191532
ATM	108166692	rs7931681	108004798	240	0.0323	0.0191149
ATM	108166692	rs172927	108124299	240	0.0323	0.0191068
ATM	108166692	rs672964	108125471	240	0.0323	0.0191068
ATM	108166692	rs672655	108129657	240	0.0323	0.0191068
ATM	108166692	rs11212546	108064935	241	0.0324	0.0190002
ATM	108166692	rs609557	108084513	241	0.0324	0.0190002
ATM	108166692	rs183460	108090710	241	0.0324	0.0190002
ATM	108166692	rs189037	108093833	241	0.0324	0.0190002
ATM	108166692	rs625120	108095220	241	0.0324	0.0190002
ATM	108166692	rs228590	108096141	241	0.0324	0.0190002
ATM	108166692	rs228591	108097333	241	0.0324	0.0190002
ATM	108166692	rs228596	108105928	241	0.0324	0.0190002
ATM	108166692	rs228598	108107497	241	0.0324	0.0190002
ATM	108166692	rs600931	108117335	241	0.0324	0.0190002
ATM	108166692	rs599406	108118234	241	0.0324	0.0190002
ATM	108166692	rs600691	108118479	241	0.0324	0.0190002
ATM	108166692	rs228592	108123189	241	0.0324	0.0190002
ATM	108166692	chr11:108145072:D	108145072	232	0.0324	0.0197499
ATM	108166692	rs4027718	108065708	236	0.0325	0.0193983
ATM	108166692	rs11212538	108045956	240	0.0326	0.0190381
ATM	108166692	rs4754301	108048541	240	0.0326	0.0190381
ATM	108166692	rs1850730	108051112	240	0.0326	0.0190381
ATM	108166692	rs4623864	108051300	240	0.0326	0.0190381
ATM	108166692	rs11212543	108054922	240	0.0326	0.0190381
ATM	108166692	rs4753833	108057430	240	0.0326	0.0190381
ATM	108166692	rs3781869	108059000	240	0.0326	0.0190381
ATM	108166692	rs3781868	108059569	240	0.0326	0.0190381
ATM	108166692	rs4754305	108075912	240	0.0326	0.0190381
ATM	108166692	rs11605442	108077857	240	0.0326	0.0190381
ATM	108166692	rs228597	108107009	240	0.0326	0.0190381
ATM	108166692	rs694799	108119366	240	0.0326	0.0190381
C11orf65	108295992	rs4754296	108006182	233	0.0326	0.0196078
ATM	108166692	rs1973723	108033955	239	0.033	0.0190438
ATM	108166692	rs12794010	108013361	240	0.0332	0.0189168
ATM	108166692	rs601111	108159356	236	0.0334	0.0191887
ATM	108166692	rs7129527	108044995	239	0.0335	0.0189342
ATM	108166692	chr11:108067234:D	108067234	235	0.0338	0.0191993
ACAT1	108005574	rs4754297	108017547	231	0.0342	0.0194273
ALKBH8	1.07405e+08	rs35422249	108010159	240	0.0351	0.0185243
ALKBH8	1.07405e+08	rs9666209	108011566	236	0.0351	0.0188309
SLN	1.0758e+08	rs1800054	108098576	241	0.0352	0.0184241
C11orf65	108295992	rs4144901	108044091	241	0.0353	0.018412
C11orf65	108295992	rs55788757	108016507	235	0.0355	0.0188317
SLN	1.0758e+08	rs75176448	108038861	240	0.0357	0.0183988
SLN	1.0758e+08	rs3092847	108094538	237	0.0357	0.0186375
SLN	1.0758e+08	rs4987980	108141454	237	0.0357	0.0186375
SLN	1.0758e+08	rs76053502	108155699	237	0.0357	0.0186375
ATM	108166692	rs11212570	108130712	241	0.0362	0.0182345
CUL5	1.07929e+08	rs7931681	108004798	240	0.0367	0.0182004
ACAT1	108005574	rs181187590	108032233	237	0.0368	0.0184285
ACAT1	108005574	rs186400268	108016730	236	0.0376	0.018337
ALKBH8	1.07405e+08	rs10890817	108006047	238	0.0395	0.0178371
ALKBH8	1.07405e+08	rs10789655	108011857	238	0.0395	0.0178371
ATM	108166692	rs57149652	108052428	240	0.0396	0.0176817
ATM	108166692	rs77166385	108054082	240	0.0396	0.0176817
ATM	108166692	rs77376169	108085808	236	0.0397	0.0179579
ALKBH8	1.07405e+08	rs1550608	108006466	235	0.0402	0.0179426
ACAT1	108005574	rs7926222	108008302	239	0.0405	0.0175799
ACAT1	108005574	rs10789654	108009381	239	0.0405	0.0175799
ACAT1	108005574	rs10749914	108012077	239	0.0405	0.0175799
EXPH5	1.0842e+08	rs10890825	108057918	241	0.0406	0.0174273
ATM	108166692	rs582157	108161202	240	0.0408	0.0174709
ATM	108166692	rs35422249	108010159	240	0.0411	0.017406
EXPH5	1.0842e+08	rs661467	108101492	240	0.0414	0.0173654
ATM	108166692	rs11212525	108016014	241	0.0426	0.0170879
CWF19L2	1.07263e+08	rs111741588	108080583	234	0.0431	0.0175195
ELMOD1	1.075e+08	rs3218674	108115587	241	0.0441	0.0168493
ALKBH8	1.07405e+08	rs7926222	108008302	239	0.0449	0.0168586
ALKBH8	1.07405e+08	rs10789654	108009381	239	0.0449	0.0168586
ALKBH8	1.07405e+08	rs10749914	108012077	239	0.0449	0.0168586
EXPH5	1.0842e+08	rs594153	108131646	237	0.045	0.0169873
ATM	108166692	rs228601	108132445	233	0.0451	0.0172764
ACAT1	108005574	rs10890814	107991611	239	0.0455	0.0167729
ACAT1	108005574	rs2356518	107999603	239	0.0455	0.0167729
ACAT1	108005574	rs10890815	108001621	239	0.0455	0.0167729
ACAT1	108005574	rs12361905	108015769	239	0.046	0.0166914
ALKBH8	1.07405e+08	rs61214973	107990733	240	0.0462	0.0166021
ALKBH8	1.07405e+08	rs3741054	107992312	240	0.0462	0.0166021
ALKBH8	1.07405e+08	rs112087419	107998126	240	0.0462	0.0166021
ALKBH8	1.07405e+08	rs35188041	108009660	240	0.0462	0.0166021
ALKBH8	1.07405e+08	rs55854804	108013006	240	0.0462	0.0166021
CWF19L2	1.07263e+08	rs3218674	108115587	241	0.0465	0.0164852
ATM	108166692	rs6589007	108040104	241	0.0466	0.016465
ATM	108166692	rs7395528	108056708	241	0.0466	0.016465
ATM	108166692	rs11212551	108078693	241	0.0466	0.016465
ATM	108166692	rs228608	108088900	241	0.0466	0.016465
EXPH5	1.0842e+08	rs34971817	107997908	240	0.0467	0.0165167
EXPH5	1.0842e+08	rs12794010	108013361	240	0.0469	0.0164883
CUL5	1.07929e+08	rs34971817	107997908	240	0.0473	0.0164233
ALKBH8	1.07405e+08	rs75085583	108016500	239	0.0474	0.0164914
EXPH5	1.0842e+08	rs920679	108038477	239	0.0476	0.0164506
C11orf65	108295992	rs4753834	108112978	241	0.0478	0.0162949
ALKBH8	1.07405e+08	rs11212524	108014088	239	0.0481	0.0163771
EXPH5	1.0842e+08	rs11212525	108016014	241	0.0488	0.0161451
KDELC2	1.08356e+08	rs138610611	108055132	240	0.0492	0.016159
ALKBH8	1.07405e+08	rs7931681	108004798	240	0.0495	0.0161142
NPAT	1.08061e+08	rs11212570	108130712	241	0.0499	0.0159993
ATM	108166692	rs12419212	108060284	241	0.0499	0.0159831
ATM	108166692	rs74708928	108065252	241	0.0499	0.0159831
ATM	108166692	rs76110388	108090396	241	0.0499	0.0159831
ATM	108166692	rs4987876	108092637	241	0.0499	0.0159831
ATM	108166692	rs75305266	108114506	241	0.0499	0.0159831
EXPH5	1.0842e+08	rs7931681	108004798	240	0.05	0.0160491

## Sheet: eQTL_BC765
Online Resource 7b. 11q22.3 eQTL SNPs from BC765 breast tumour dataset
Gene	ePosition	SNP	mPosition	N	P-value	r2
LOC643923	107463210	rs183293362	108159051	740	0.000227	0.0182671
ATM	1.08167e+08	rs4987924	108116482	752	0.000833	0.0147861
KDELC2	108355996	rs4753834	108112978	760	0.00086	0.0145555
ATM	1.08167e+08	rs1800058	108160350	754	0.00115	0.0139671
ATM	1.08167e+08	rs116938054	108016190	754	0.00119	0.0138778
ATM	1.08167e+08	rs4987874	108092303	754	0.00119	0.0138778
ATM	1.08167e+08	rs4987923	108116412	753	0.00119	0.0138961
ATM	1.08167e+08	rs75092469	108090335	754	0.00119	0.0138778
ATM	1.08167e+08	rs75610336	108069039	754	0.00119	0.0138778
ATM	1.08167e+08	rs186335296	108010054	755	0.00127	0.0136995
KDELC2	108355996	rs665293	108142617	754	0.0015	0.0133279
KDELC2	108355996	rs228593	108141134	753	0.00172	0.0130031
KDELC2	108355996	rs1150201	108165053	752	0.00211	0.0125264
KDELC2	108355996	SNP_A-8331656	108038477	765	0.00214	0.0122888
KDELC2	108355996	rs61913701	108051989	714	0.00317	0.0121648
ACAT1	1.08006e+08	rs117187961	108008243	754	0.0032	0.0114979
KDELC2	108355996	rs10890825	108057918	764	0.00329	0.0112807
DDX10	108673733	rs139215477	108052002	745	0.00389	0.0111647
NPAT	108060741	rs4987924	108116482	752	0.00408	0.0109442
KDELC2	108355996	chr11:108047407:I	108047407	756	0.00464	0.0105831
KDELC2	108355996	rs1519074	108047982	756	0.00464	0.0105831
KDELC2	108355996	rs4754300	108039042	756	0.00464	0.0105831
KDELC2	108355996	rs73006208	108041816	756	0.00464	0.0105831
KDELC2	108355996	rs4754296	108006182	753	0.005	0.0104463
KDELC2	108355996	rs58774930	108083480	749	0.00524	0.0103889
KDELC2	108355996	rs4753835	108145249	756	0.00571	0.0100869
KDELC2	108355996	rs61913679	108010101	755	0.00584	0.0100494
NPAT	108060741	rs1800058	108160350	754	0.00593	0.0100248
KDELC2	108355996	chr11:108150207:D	108150207	759	0.00608	0.00990099
KDELC2	108355996	rs137896766	108146299	759	0.00608	0.00990099
NPAT	108060741	rs4987923	108116412	753	0.00635	0.00987488
NPAT	108060741	rs116938054	108016190	754	0.00642	0.00983581
NPAT	108060741	rs4987874	108092303	754	0.00642	0.00983581
NPAT	108060741	rs75092469	108090335	754	0.00642	0.00983581
NPAT	108060741	rs75610336	108069039	754	0.00642	0.00983581
NPAT	108060741	rs186335296	108010054	755	0.00656	0.00977339
KDELC2	108355996	rs55788757	108016507	747	0.00661	0.0098602
KDELC2	108355996	rs10890816	108001714	748	0.00666	0.0098274
KDELC2	108355996	rs117813661	108126353	762	0.00666	0.00964811
KDELC2	108355996	rs3092991	108140516	762	0.00666	0.00964811
KDELC2	108355996	rs55985317	108110663	762	0.00666	0.00964811
EXPH5	108420266	rs58774930	108083480	749	0.00671	0.00979731
DDX10	108673733	rs145904821	108009211	701	0.00695	0.0103762
KDELC2	108355996	SNP_A-2128296	108168995	765	0.00706	0.00947426
ELMOD1	107499661	rs76395107	108079330	743	0.0072	0.00970516
CWF19L2	1.07263e+08	rs4987924	108116482	752	0.00736	0.00953749
KDELC2	108355996	SNP_A-8320548	108008302	765	0.00747	0.00934308
KDELC2	108355996	rs73006241	108089151	764	0.00786	0.00923543
KDELC2	108355996	rs12226342	108005343	745	0.00807	0.00940862
ACAT1	1.08006e+08	rs80130550	108067397	708	0.00817	0.00986628
ACAT1	1.08006e+08	rs145904821	108009211	701	0.00839	0.00989819
KDELC2	108355996	rs2356518	107999603	762	0.00847	0.00908383
KDELC2	108355996	rs10749914	108012077	751	0.00916	0.00903118
KDELC2	108355996	rs7928764	108021276	742	0.00931	0.00910286
KDELC2	108355996	rs12226047	108005215	749	0.00942	0.00898941
KDELC2	108355996	SNP_A-8629976	107993500	765	0.00968	0.00874075
KDELC2	108355996	rs10890814	107991611	762	0.00979	0.0087478
KDELC2	108355996	rs10789654	108009381	760	0.00992	0.00873957
KDELC2	108355996	rs7123836	107995903	759	0.0102	0.00869
KDELC2	108355996	rs10890815	108001621	758	0.0107	0.008587
ELMOD1	107499661	rs2235010	108127145	764	0.0107	0.00852512
ELMOD1	107499661	rs4987922	108116371	764	0.0107	0.00852512
KDELC2	108355996	rs1550608	108006466	757	0.0109	0.00855011
ALKBH8	107404957	chr11:108100222:I	108100222	747	0.0117	0.00849764
CWF19L2	1.07263e+08	rs1800058	108160350	754	0.0121	0.00835121
CWF19L2	1.07263e+08	rs76395038	108047119	707	0.0123	0.0088612
SLC35F2	1.07696e+08	chr11:108100222:I	108100222	747	0.0126	0.00833003
KDELC2	108355996	rs10890817	108006047	763	0.0126	0.00814985
CWF19L2	1.07263e+08	rs116938054	108016190	754	0.0126	0.00824136
CWF19L2	1.07263e+08	rs4987874	108092303	754	0.0126	0.00824136
CWF19L2	1.07263e+08	rs75092469	108090335	754	0.0126	0.00824136
CWF19L2	1.07263e+08	rs75610336	108069039	754	0.0126	0.00824136
CWF19L2	1.07263e+08	rs4987923	108116412	753	0.0128	0.00821426
CWF19L2	1.07263e+08	rs186335296	108010054	755	0.0129	0.0081887
EXPH5	108420266	SNP_A-8339052	108092637	765	0.0138	0.00792232
EXPH5	108420266	rs75305266	108114506	752	0.0145	0.00794307
KDELC2	108355996	rs10890819	108014799	728	0.0149	0.00813846
KDELC2	108355996	rs10890820	108014949	728	0.0149	0.00813846
EXPH5	108420266	rs12419212	108060284	763	0.0158	0.00763638
EXPH5	108420266	rs74708928	108065252	760	0.016	0.00762609
EXPH5	108420266	rs76110388	108090396	764	0.0161	0.00757473
RAB39A	1.07817e+08	rs2235010	108127145	764	0.0162	0.00755922
RAB39A	1.07817e+08	rs4987922	108116371	764	0.0162	0.00755922
DDX10	108673733	rs73006226	108072728	728	0.0162	0.00794193
KDELC2	108355996	rs11212524	108014088	750	0.0164	0.00767592
KDELC2	108355996	rs11212515	107997465	752	0.0166	0.00762409
KDELC2	108355996	rs12361905	108015769	745	0.0178	0.00754029
CWF19L2	1.07263e+08	rs145904821	108009211	701	0.0202	0.0076985
ATM	1.08167e+08	chr11:108100222:I	108100222	747	0.0208	0.00714721
RAB39A	1.07817e+08	rs139215477	108052002	745	0.0212	0.00713181
EXPH5	108420266	SNP_A-8588063	108006156	765	0.023	0.00675743
EXPH5	108420266	rs12420555	108024050	754	0.024	0.00675591
KDELC2	108355996	rs10789655	108011857	741	0.0244	0.0068379
ACAT1	1.08006e+08	SNP_A-4295186	108130712	765	0.0244	0.00662165
C11orf65	1.08296e+08	chr11:108010538:D	108010538	704	0.0245	0.00718448
EXPH5	108420266	rs78243683	108031376	755	0.0245	0.00669852
KDELC2	108355996	rs3741055	107992325	756	0.0248	0.00666221
KDELC2	108355996	rs4754297	108017547	717	0.0251	0.00700099
EXPH5	108420266	rs77166385	108054082	755	0.0252	0.00663693
RAB39A	1.07817e+08	rs117590923	108095034	718	0.0254	0.00695685
KDELC2	108355996	rs3741056	107992346	755	0.0254	0.00661334
EXPH5	108420266	rs77376169	108085808	747	0.0256	0.00666932
EXPH5	108420266	rs57149652	108052428	756	0.0257	0.00658107
KDELC2	108355996	rs9666209	108011566	740	0.0263	0.00667466
EXPH5	108420266	rs4753834	108112978	760	0.0264	0.00648277
C11orf65	1.08296e+08	chr11:108010537:D	108010537	703	0.0265	0.00700479
EXPH5	108420266	rs59021565	107999907	761	0.0265	0.00647168
C11orf65	1.08296e+08	rs75085583	108016500	743	0.0268	0.00660254
KDELC2	108355996	rs117187961	108008243	754	0.0291	0.00631361
KDELC2	108355996	rs651030	108141701	761	0.0294	0.00623363
KDELC2	108355996	rs7129527	108044995	756	0.0298	0.00624589
C11orf65	1.08296e+08	rs112087419	107998126	753	0.0301	0.00624964
C11orf65	1.08296e+08	rs35188041	108009660	755	0.0301	0.00623315
ELMOD1	107499661	rs4987886	108096053	724	0.0309	0.00643478
C11orf65	1.08296e+08	rs55854804	108013006	751	0.0314	0.0061647
LOC643923	107463210	rs624852	108131797	709	0.0321	0.00648246
KDELC2	108355996	rs228595	108105593	761	0.0324	0.00602019
RAB39A	1.07817e+08	rs117923923	108048383	717	0.0325	0.00638001
C11orf65	1.08296e+08	rs3741054	107992312	752	0.0327	0.00606828
DDX10	108673733	rs76395038	108047119	707	0.0327	0.00645312
LOC643923	107463210	rs624888	108131776	712	0.0332	0.00636903
KDELC2	108355996	rs9734846	108009174	695	0.0334	0.00651144
SLN	107580444	rs4987879	108093077	763	0.0349	0.00583176
SLN	107580444	rs182426131	108041250	762	0.0353	0.00581728
C11orf65	1.08296e+08	rs61214973	107990733	747	0.0353	0.00593106
DDX10	108673733	rs2235010	108127145	764	0.036	0.00575799
DDX10	108673733	rs4987922	108116371	764	0.036	0.00575799
KDELC2	108355996	chr11:108098459:D	108098459	761	0.0364	0.00575718
DDX10	108673733	rs138610611	108055132	735	0.0368	0.00593591
ACAT1	1.08006e+08	rs651030	108141701	761	0.0369	0.00572331
SLN	107580444	rs76053502	108155699	762	0.037	0.00571452
SLN	107580444	rs3092847	108094538	763	0.0379	0.00564989
SLN	107580444	rs4987980	108141454	763	0.0379	0.00564989
ACAT1	1.08006e+08	rs117869373	108074248	754	0.0382	0.00569872
ATM	1.08167e+08	rs187427601	108121054	756	0.0382	0.00568763
LOC643923	107463210	rs80078892	108165407	710	0.0402	0.00592932
ACAT1	1.08006e+08	rs2234996	108106326	698	0.0403	0.00602952
ATM	1.08167e+08	rs183293362	108159051	740	0.0406	0.00566823
ALKBH8	107404957	rs4987924	108116482	752	0.0409	0.00555958
ATM	1.08167e+08	rs3741054	107992312	752	0.0417	0.00551739
KDELC2	108355996	rs117869373	108074248	754	0.0418	0.00550017
KDELC2	108355996	rs111741588	108080583	742	0.0421	0.00556881
ATM	1.08167e+08	rs61214973	107990733	747	0.0421	0.00553297
KDELC2	108355996	rs4987924	108116482	752	0.0425	0.00547519
LOC643923	107463210	rs621947	108165219	764	0.0428	0.00537385
ATM	1.08167e+08	rs112087419	107998126	753	0.0429	0.00544818
LOC643923	107463210	rs4987982	108151269	765	0.0436	0.00532795
ACAT1	1.08006e+08	rs1150201	108165053	752	0.0437	0.00541189
CWF19L2	1.07263e+08	rs140499847	108109622	724	0.0438	0.00561922
ELMOD1	107499661	rs77376169	108085808	747	0.0438	0.0054427
CWF19L2	1.07263e+08	rs138228649	108086488	727	0.0439	0.00558927
CWF19L2	1.07263e+08	rs45466794	108130077	727	0.0439	0.00558927
ACAT1	1.08006e+08	rs139215477	108052002	745	0.0446	0.00541866
LOC643923	107463210	SNP_A-1840526	108066130	765	0.045	0.00525403
LOC643923	107463210	rs647681	108161252	765	0.0454	0.00523847
LOC643923	107463210	rs664677	108143182	765	0.0454	0.00523847
KDELC2	108355996	SNP_A-4236168	108087847	765	0.046	0.00520604
KDELC2	108355996	rs80130550	108067397	708	0.0462	0.0056198
LOC643923	107463210	rs228599	108107660	764	0.0477	0.00513751
LOC643923	107463210	rs599164	108120439	764	0.0477	0.00513751
LOC643923	107463210	rs623860	108106782	764	0.0477	0.00513751
LOC643923	107463210	rs679782	108116700	764	0.0477	0.00513751
ACAT1	1.08006e+08	chr11:108098459:D	108098459	761	0.0479	0.00514859
NPAT	108060741	rs626434	108127288	755	0.048	0.00518283
ATM	1.08167e+08	rs35188041	108009660	755	0.0486	0.00515391
NPAT	108060741	rs187427601	108121054	756	0.0491	0.00512348
LOC643923	107463210	rs627418	108131225	765	0.0491	0.00506335
LOC643923	107463210	rs642496	108137775	765	0.0491	0.00506335
ACAT1	1.08006e+08	rs228595	108105593	761	0.0497	0.00506643
KDELC2	108355996	rs1800058	108160350	754	0.0498	0.0051094
ACAT1	1.08006e+08	rs61913701	108051989	714	0.0498	0.00539212

## Sheet: eQTL_NB93
Online Resource 7c. 11q22.3 eQTL SNPs from NB93 normal breast dataset
Gene	ePosition	SNP	mPosition	N	P-value	r2
ACAT1	1.08006e+08	chr11:108075271:D	108075271	87	0.00654	0.0837753
ACAT1	1.08006e+08	rs11212525	108016014	88	0.00875	0.0772334
ACAT1	1.08006e+08	SNP_A-1907368	108168863	93	0.0095	0.0716275
ACAT1	1.08006e+08	SNP_A-4219376	108084513	93	0.0096	0.071438
SLC35F2	1.07696e+08	rs11212525	108016014	88	0.00964	0.0753583
SLC35F2	1.07696e+08	rs12794010	108013361	89	0.0109	0.0721781
ALKBH8	107404957	rs138610611	108055132	91	0.011	0.0703893
ACAT1	1.08006e+08	rs228601	108132445	89	0.011	0.0719406
ACAT1	1.08006e+08	rs12794010	108013361	89	0.0113	0.0714453
ACAT1	1.08006e+08	chr11:108067234:D	108067234	91	0.0118	0.0690669
ACAT1	1.08006e+08	chr11:108031294:D	108031294	92	0.0119	0.0681686
ACAT1	1.08006e+08	rs11212527	108021205	86	0.012	0.0728067
ACAT1	1.08006e+08	rs10890821	108022061	89	0.0121	0.0701949
ACAT1	1.08006e+08	rs12575358	108022234	89	0.0121	0.0701949
ACAT1	1.08006e+08	rs4754298	108023284	89	0.0121	0.0701949
KDELC2	108355996	rs4144901	108044091	90	0.0129	0.0682112
ACAT1	1.08006e+08	chr11:108029109:I	108029109	93	0.0142	0.0643347
ACAT1	1.08006e+08	rs6589007	108040104	93	0.0142	0.0643347
ACAT1	1.08006e+08	rs4754301	108048541	93	0.0142	0.0643347
ACAT1	1.08006e+08	rs1850730	108051112	93	0.0142	0.0643347
ACAT1	1.08006e+08	rs4623864	108051300	93	0.0142	0.0643347
ACAT1	1.08006e+08	rs11212543	108054922	93	0.0142	0.0643347
ACAT1	1.08006e+08	rs7395528	108056708	93	0.0142	0.0643347
ACAT1	1.08006e+08	rs3781868	108059569	93	0.0142	0.0643347
ACAT1	1.08006e+08	rs4754305	108075912	93	0.0142	0.0643347
ACAT1	1.08006e+08	rs11605442	108077857	93	0.0142	0.0643347
ACAT1	1.08006e+08	rs228608	108088900	93	0.0142	0.0643347
ACAT1	1.08006e+08	rs183460	108090710	93	0.0142	0.0643347
ACAT1	1.08006e+08	rs625120	108095220	93	0.0142	0.0643347
ACAT1	1.08006e+08	rs228590	108096141	93	0.0142	0.0643347
ACAT1	1.08006e+08	SNP_A-2277116	108097333	93	0.0142	0.0643347
ACAT1	1.08006e+08	rs641605	108101919	93	0.0142	0.0643347
ACAT1	1.08006e+08	rs228597	108107009	93	0.0142	0.0643347
ACAT1	1.08006e+08	rs228598	108107497	93	0.0142	0.0643347
ACAT1	1.08006e+08	rs600931	108117335	93	0.0142	0.0643347
ACAT1	1.08006e+08	rs599406	108118234	93	0.0142	0.0643347
ACAT1	1.08006e+08	rs694799	108119366	93	0.0142	0.0643347
ACAT1	1.08006e+08	rs228592	108123189	93	0.0142	0.0643347
ACAT1	1.08006e+08	rs637064	108140909	93	0.0142	0.0643347
ACAT1	1.08006e+08	rs11212579	108150664	93	0.0142	0.0643347
ACAT1	1.08006e+08	rs1003623	108152582	93	0.0142	0.0643347
ACAT1	1.08006e+08	rs1003624	108152645	93	0.0142	0.0643347
ACAT1	1.08006e+08	rs624366	108154097	93	0.0142	0.0643347
ACAT1	1.08006e+08	rs654005	108155397	93	0.0142	0.0643347
ACAT1	1.08006e+08	rs609261	108158134	93	0.0142	0.0643347
ACAT1	1.08006e+08	rs582157	108161202	93	0.0142	0.0643347
ACAT1	1.08006e+08	rs600329	108163733	93	0.0142	0.0643347
ACAT1	1.08006e+08	rs583725	108165075	93	0.0142	0.0643347
ACAT1	1.08006e+08	chr11:108166958:D	108166958	93	0.0142	0.0643347
ACAT1	1.08006e+08	rs1607476	108075161	92	0.0155	0.0633781
EXPH5	108420266	rs11212525	108016014	88	0.0155	0.0662121
ACAT1	1.08006e+08	rs592955	108156473	90	0.0161	0.0640887
ACAT1	1.08006e+08	rs4144901	108044091	90	0.017	0.0630623
ACAT1	1.08006e+08	chr11:108075107:I	108075107	86	0.0175	0.0654206
EXPH5	108420266	rs12794010	108013361	89	0.0179	0.0627424
ACAT1	1.08006e+08	rs228589	108093208	92	0.0184	0.0602485
ACAT1	1.08006e+08	rs11212538	108045956	92	0.0188	0.0597871
ACAT1	1.08006e+08	rs4753833	108057430	92	0.0188	0.0597871
ACAT1	1.08006e+08	rs3781869	108059000	92	0.0188	0.0597871
ACAT1	1.08006e+08	rs11212546	108064935	92	0.0188	0.0597871
ACAT1	1.08006e+08	rs189037	108093833	92	0.0188	0.0597871
ACAT1	1.08006e+08	rs228596	108105928	92	0.0188	0.0597871
ACAT1	1.08006e+08	rs600691	108118479	92	0.0188	0.0597871
ACAT1	1.08006e+08	rs172927	108124299	92	0.0188	0.0597871
ACAT1	1.08006e+08	rs672964	108125471	92	0.0188	0.0597871
ACAT1	1.08006e+08	rs672655	108129657	92	0.0188	0.0597871
ACAT1	1.08006e+08	rs619972	108169619	92	0.0188	0.0597871
ACAT1	1.08006e+08	rs1150203	108170271	92	0.0188	0.0597871
ACAT1	1.08006e+08	SNP_A-1840526	108066130	93	0.0216	0.0566136
ACAT1	1.08006e+08	rs4754299	108025214	93	0.0229	0.0555953
ACAT1	1.08006e+08	SNP_A-8642059	108034124	93	0.0229	0.0555953
ACAT1	1.08006e+08	rs2070661	108043988	93	0.0229	0.0555953
ACAT1	1.08006e+08	rs1893813	108054604	93	0.0229	0.0555953
ACAT1	1.08006e+08	rs7118967	108057856	93	0.0229	0.0555953
ACAT1	1.08006e+08	rs2056267	108061808	93	0.0229	0.0555953
ACAT1	1.08006e+08	rs12272183	108077181	93	0.0229	0.0555953
ACAT1	1.08006e+08	rs228607	108088493	93	0.0229	0.0555953
ACAT1	1.08006e+08	rs183459	108089197	93	0.0229	0.0555953
ACAT1	1.08006e+08	rs661467	108101492	93	0.0229	0.0555953
ACAT1	1.08006e+08	rs228594	108104525	93	0.0229	0.0555953
ACAT1	1.08006e+08	rs623860	108106782	93	0.0229	0.0555953
ACAT1	1.08006e+08	rs228599	108107660	93	0.0229	0.0555953
ACAT1	1.08006e+08	chr11:108111429:D	108111429	93	0.0229	0.0555953
ACAT1	1.08006e+08	rs228588	108113331	93	0.0229	0.0555953
ACAT1	1.08006e+08	rs679782	108116700	93	0.0229	0.0555953
ACAT1	1.08006e+08	rs694376	108119048	93	0.0229	0.0555953
ACAT1	1.08006e+08	rs599164	108120439	93	0.0229	0.0555953
ACAT1	1.08006e+08	rs627418	108131225	93	0.0229	0.0555953
ACAT1	1.08006e+08	rs594153	108131646	93	0.0229	0.0555953
ACAT1	1.08006e+08	rs642496	108137775	93	0.0229	0.0555953
ACAT1	1.08006e+08	rs664677	108143182	93	0.0229	0.0555953
ACAT1	1.08006e+08	SNP_A-8339383	108148839	93	0.0229	0.0555953
ACAT1	1.08006e+08	rs4987982	108151269	93	0.0229	0.0555953
ACAT1	1.08006e+08	rs647681	108161252	93	0.0229	0.0555953
ACAT1	1.08006e+08	rs621947	108165219	93	0.0229	0.0555953
C11orf65	1.08296e+08	rs137896766	108146299	91	0.0229	0.0568237
C11orf65	1.08296e+08	chr11:108150207:D	108150207	91	0.0229	0.0568237
C11orf65	1.08296e+08	chr11:108031294:D	108031294	92	0.0238	0.0554454
C11orf65	1.08296e+08	rs1973723	108033955	91	0.0238	0.0561135
C11orf65	1.08296e+08	rs11212527	108021205	86	0.0239	0.0592557
ACAT1	1.08006e+08	rs1973723	108033955	91	0.0251	0.0550914
ACAT1	1.08006e+08	rs7931681	108004798	92	0.0253	0.0543934
ACAT1	1.08006e+08	rs10789656	108024336	91	0.0257	0.0546497
C11orf65	1.08296e+08	SNP_A-4219376	108084513	93	0.027	0.0526064
C11orf65	1.08296e+08	rs592955	108156473	90	0.0271	0.0543125
C11orf65	1.08296e+08	rs228601	108132445	89	0.0275	0.0546561
C11orf65	1.08296e+08	rs11212538	108045956	92	0.029	0.0518831
C11orf65	1.08296e+08	rs4753833	108057430	92	0.029	0.0518831
C11orf65	1.08296e+08	rs3781869	108059000	92	0.029	0.0518831
C11orf65	1.08296e+08	rs11212546	108064935	92	0.029	0.0518831
C11orf65	1.08296e+08	rs189037	108093833	92	0.029	0.0518831
C11orf65	1.08296e+08	rs228596	108105928	92	0.029	0.0518831
C11orf65	1.08296e+08	rs600691	108118479	92	0.029	0.0518831
C11orf65	1.08296e+08	rs172927	108124299	92	0.029	0.0518831
C11orf65	1.08296e+08	rs672964	108125471	92	0.029	0.0518831
C11orf65	1.08296e+08	rs672655	108129657	92	0.029	0.0518831
C11orf65	1.08296e+08	rs619972	108169619	92	0.029	0.0518831
C11orf65	1.08296e+08	rs1150203	108170271	92	0.029	0.0518831
C11orf65	1.08296e+08	rs228589	108093208	92	0.0291	0.0518331
ACAT1	1.08006e+08	chr11:108055259:I	108055259	92	0.0292	0.0517732
EXPH5	108420266	chr11:108075271:D	108075271	87	0.0293	0.0546522
C11orf65	1.08296e+08	chr11:108029109:I	108029109	93	0.0295	0.0510157
C11orf65	1.08296e+08	rs6589007	108040104	93	0.0295	0.0510157
C11orf65	1.08296e+08	rs4754301	108048541	93	0.0295	0.0510157
C11orf65	1.08296e+08	rs1850730	108051112	93	0.0295	0.0510157
C11orf65	1.08296e+08	rs4623864	108051300	93	0.0295	0.0510157
C11orf65	1.08296e+08	rs11212543	108054922	93	0.0295	0.0510157
C11orf65	1.08296e+08	rs7395528	108056708	93	0.0295	0.0510157
C11orf65	1.08296e+08	rs3781868	108059569	93	0.0295	0.0510157
C11orf65	1.08296e+08	rs4754305	108075912	93	0.0295	0.0510157
C11orf65	1.08296e+08	rs11605442	108077857	93	0.0295	0.0510157
C11orf65	1.08296e+08	rs228608	108088900	93	0.0295	0.0510157
C11orf65	1.08296e+08	rs183460	108090710	93	0.0295	0.0510157
C11orf65	1.08296e+08	rs625120	108095220	93	0.0295	0.0510157
C11orf65	1.08296e+08	rs228590	108096141	93	0.0295	0.0510157
C11orf65	1.08296e+08	SNP_A-2277116	108097333	93	0.0295	0.0510157
C11orf65	1.08296e+08	rs641605	108101919	93	0.0295	0.0510157
C11orf65	1.08296e+08	rs228597	108107009	93	0.0295	0.0510157
C11orf65	1.08296e+08	rs228598	108107497	93	0.0295	0.0510157
C11orf65	1.08296e+08	rs600931	108117335	93	0.0295	0.0510157
C11orf65	1.08296e+08	rs599406	108118234	93	0.0295	0.0510157
C11orf65	1.08296e+08	rs694799	108119366	93	0.0295	0.0510157
C11orf65	1.08296e+08	rs228592	108123189	93	0.0295	0.0510157
C11orf65	1.08296e+08	rs637064	108140909	93	0.0295	0.0510157
C11orf65	1.08296e+08	rs11212579	108150664	93	0.0295	0.0510157
C11orf65	1.08296e+08	rs1003623	108152582	93	0.0295	0.0510157
C11orf65	1.08296e+08	rs1003624	108152645	93	0.0295	0.0510157
C11orf65	1.08296e+08	rs624366	108154097	93	0.0295	0.0510157
C11orf65	1.08296e+08	rs654005	108155397	93	0.0295	0.0510157
C11orf65	1.08296e+08	rs609261	108158134	93	0.0295	0.0510157
C11orf65	1.08296e+08	rs582157	108161202	93	0.0295	0.0510157
C11orf65	1.08296e+08	rs600329	108163733	93	0.0295	0.0510157
C11orf65	1.08296e+08	rs583725	108165075	93	0.0295	0.0510157
C11orf65	1.08296e+08	chr11:108166958:D	108166958	93	0.0295	0.0510157
C11orf65	1.08296e+08	chr11:108052191:I	108052191	84	0.0296	0.0563867
ACAT1	1.08006e+08	rs4027718	108065708	89	0.0298	0.0531437
C11orf65	1.08296e+08	rs1893812	108054500	85	0.0301	0.0554228
C11orf65	1.08296e+08	rs80078892	108165407	85	0.0301	0.0554228
ACAT1	1.08006e+08	rs1893812	108054500	85	0.0304	0.0552077
ACAT1	1.08006e+08	rs80078892	108165407	85	0.0304	0.0552077
SLC35F2	1.07696e+08	rs4144901	108044091	90	0.031	0.0517752
ACAT1	1.08006e+08	rs34971817	107997908	91	0.0317	0.0508084
C11orf65	1.08296e+08	rs4753834	108112978	92	0.0325	0.049791
C11orf65	1.08296e+08	chr11:108067234:D	108067234	91	0.0329	0.0501094
ACAT1	1.08006e+08	rs641312	108148265	90	0.033	0.0506295
C11orf65	1.08296e+08	SNP_A-2128296	108168995	93	0.0332	0.0488733
ACAT1	1.08006e+08	rs11212551	108078693	90	0.0339	0.0501274
C11orf65	1.08296e+08	rs10789656	108024336	91	0.0359	0.0484947
C11orf65	1.08296e+08	chr11:108075271:D	108075271	87	0.0378	0.0497697
C11orf65	1.08296e+08	rs4753835	108145249	90	0.0397	0.047186
C11orf65	1.08296e+08	SNP_A-1907368	108168863	93	0.0403	0.0454212
ACAT1	1.08006e+08	chr11:108052191:I	108052191	84	0.0408	0.0500353
EXPH5	108420266	rs7931681	108004798	92	0.0414	0.0453967
ACAT1	1.08006e+08	rs624852	108131797	87	0.0444	0.0467112
C11orf65	1.08296e+08	rs4027718	108065708	89	0.0461	0.0449426
C11orf65	1.08296e+08	rs10890821	108022061	89	0.0469	0.0446384
C11orf65	1.08296e+08	rs12575358	108022234	89	0.0469	0.0446384
C11orf65	1.08296e+08	rs4754298	108023284	89	0.0469	0.0446384
C11orf65	1.08296e+08	rs11212551	108078693	90	0.0473	0.0439667
ACAT1	1.08006e+08	rs624888	108131776	86	0.0479	0.045769
C11orf65	1.08296e+08	rs624888	108131776	86	0.0481	0.0457148
ACAT1	1.08006e+08	rs6589004	108023745	92	0.0491	0.0423392
EXPH5	108420266	chr11:108031294:D	108031294	92	0.0491	0.0423494
DDX10	108673733	chr11:108031294:D	108031294	92	0.0491	0.0423392

## Sheet: eQTL_NB_116
Online Resource 7d. 11q22.3 eQTL SNPs from NB116 normal breast dataset
Gene	ePosition	SNP	mPosition	N	P-value	r2
SLC35F2	107695815	rs4754297	108017547	114	0.0107	0.0567071
NPAT	1.08061e+08	rs141518244	108033830	116	0.0137	0.0520933
SLC35F2	107695815	rs10890819	108014799	116	0.0159	0.0498892
SLC35F2	107695815	rs10890820	108014949	116	0.0159	0.0498892
SLC35F2	107695815	rs12226047	108005215	114	0.018	0.0489292
SLC35F2	107695815	rs12226342	108005343	114	0.018	0.0489292
SLC35F2	107695815	rs920679	108038477	116	0.019	0.0473007
SLC35F2	107695815	rs10890825	108057918	116	0.019	0.0473007
SLC35F2	107695815	rs228593	108141134	116	0.019	0.0473007
SLC35F2	107695815	rs665293	108142617	116	0.019	0.0473007
SLC35F2	107695815	rs1150201	108165053	116	0.019	0.0473007
SLC35F2	107695815	rs7928764	108021276	115	0.0201	0.0469041
SLC35F2	107695815	rs61913701	108051989	111	0.0228	0.0466611
SLC35F2	107695815	rs12420555	108024050	116	0.0255	0.0429819
SLC35F2	107695815	rs78243683	108031376	116	0.0255	0.0429819
SLC35F2	107695815	rs57149652	108052428	116	0.0255	0.0429819
SLC35F2	107695815	rs77166385	108054082	116	0.0255	0.0429819
SLC35F2	107695815	rs12419212	108060284	116	0.0255	0.0429819
SLC35F2	107695815	rs74708928	108065252	116	0.0255	0.0429819
SLC35F2	107695815	rs76110388	108090396	116	0.0255	0.0429819
SLC35F2	107695815	rs4987876	108092637	116	0.0255	0.0429819
SLC35F2	107695815	rs75305266	108114506	116	0.0255	0.0429819
SLC35F2	107695815	rs11212515	107997465	114	0.0306	0.0410713
NPAT	1.08061e+08	rs3741049	108009927	113	0.0309	0.0413018
SLC35F2	107695815	rs10890817	108006047	116	0.0321	0.0396523
SLC35F2	107695815	rs1550608	108006466	116	0.0321	0.0396523
SLC35F2	107695815	rs9666209	108011566	116	0.0321	0.0396523
SLC35F2	107695815	rs10789655	108011857	116	0.0321	0.0396523
SLC35F2	107695815	rs11212524	108014088	116	0.0321	0.0396523
SLC35F2	107695815	rs3741055	107992325	116	0.033	0.0392395
SLC35F2	107695815	rs3741056	107992346	116	0.033	0.0392395
SLC35F2	107695815	rs7114794	107993500	116	0.033	0.0392395
ALKBH8	1.07405e+08	rs11212570	108130712	116	0.0363	0.0378773
SLC35F2	107695815	rs77376169	108085808	115	0.0446	0.0352353
EXPH5	1.0842e+08	rs61913701	108051989	111	0.0468	0.0357652
NPAT	1.08061e+08	rs2234996	108106326	116	0.0475	0.0340129
ALKBH8	1.07405e+08	rs35422249	108010159	114	0.0491	0.034133
